# Supplementary material for: Analyses of GWAS and sub-threshold loci lead to the discovery of dendrite development and morphology dysfunction underlying schizophrenia genetic risk
Source: Research Square preprint supplement (doi:10.21203/rs.3.rs-240477/v1), 2021-03-02
Supplement: Supplementary file 1 [file a40763bb52113c5e79991555.xlsx]

## Sheet: Index of STs
Index of STs
ST1	HRGs derived from iRIGS
ST2	GSEA with MPO of allHRGs, sigHRGs and subHRGs
ST3	GSEA with biological process terms of GO and significant terms of allHRGs are listed here
ST4	Literature support of HRGs in dendrite development term
ST5	eQTL evidence of LRP8 and ASAP1
ST6	iPSC lines used in this study.

## Sheet: ST1 iRIGS results
ST1 HRGs derived from iRIGS
official_name	p	SNP	region_p	ensembl	chr	pos_hg19	distance	index	name	ngene	score	pick	rank	dendrite_development	regulation_of_dendrite_development
KLC1	0.151	sigGWAS_rs10083370	1	ENSG00000126214	14	104314182	285949	10	sigGWAS_rs10083370_KLC1	20	3.02	chosen	1/20
FOXG1	1	sigGWAS_rs10148671	1	ENSG00000176165	14	29469373	234323	1	sigGWAS_rs10148671_FOXG1	1	1	chosen	1/1
DDHD2	0.618	sigGWAS_rs10156310	1	ENSG00000085788	8	38209129	126393	14	sigGWAS_rs10156310_DDHD2	20	12.36	chosen	1/20
ZNF804A	0.684	sigGWAS_rs10196799	1	ENSG00000170396	2	185640728	177635	1	sigGWAS_rs10196799_ZNF804A	2	1.368	chosen	1/2
PTK2B	0.82	sigGWAS_rs1042992	1	ENSG00000120899	8	26269191	899808	12	sigGWAS_rs1042992_PTK2B	12	9.84	chosen	1/12
CBR4	0.566	sigGWAS_rs10520163	1	ENSG00000145439	4	170626552	695126	1	sigGWAS_rs10520163_CBR4	7	3.962	chosen	1/7
MAD1L1	0.568	sigGWAS_rs10650434	1	ENSG00000002822	7	2025096	247782	12	sigGWAS_rs10650434_MAD1L1	20	11.36	chosen	1/20
ABCD2	0.325	sigGWAS_rs10783624	1	ENSG00000173208	12	39522907	490646	4	sigGWAS_rs10783624_ABCD2	6	1.95	chosen	1/6
PHF7	0.688	sigGWAS_rs1080500	1	ENSG00000010318	3	53175017	731507	10	sigGWAS_rs1080500_PHF7	20	13.76	chosen	1/20
COL15A1	0.481	sigGWAS_rs10985817	1	ENSG00000204291	9	101071090	634371	17	sigGWAS_rs10985817_COL15A1	20	9.62	chosen	1/20
GRIA1	0.955	sigGWAS_rs111294930	1	ENSG00000155511	5	152177121	692054	3	sigGWAS_rs111294930_GRIA1	3	2.865	chosen	1/3
DPYD	1	sigGWAS_rs11165867	1	ENSG00000188641	1	97878068	508537	2	sigGWAS_rs11165867_DPYD	2	2	chosen	1/2
SOX5	0.89	sigGWAS_rs1120004	1	ENSG00000134532	12	23633432	470534	3	sigGWAS_rs1120004_SOX5	3	2.67	chosen	1/3
SATB1	0.77	sigGWAS_rs11409090	1	ENSG00000182568	3	17887635	599445	2	sigGWAS_rs11409090_SATB1	2	1.54	chosen	1/2
TMEM219	0.278	sigGWAS_rs11646127	1	ENSG00000149932	16	29966277	14071	19	sigGWAS_rs11646127_TMEM219	20	5.56	chosen	1/20
CUL3	0.873	sigGWAS_rs11685299	1	ENSG00000036257	2	225391296	58814	7	sigGWAS_rs11685299_CUL3	9	7.857	chosen	1/9
PTK2B	0.762	sigGWAS_rs11783093	1	ENSG00000120899	8	27425349	256350	4	sigGWAS_rs11783093_PTK2B	18	13.716	chosen	1/18
FOXG1	0.56	sigGWAS_rs1191551	1	ENSG00000176165	14	30000405	765355	1	sigGWAS_rs1191551_FOXG1	2	1.12	chosen	1/2
TNKS	0.74	sigGWAS_rs11993663	1	ENSG00000173273	8	10032894	619470	1	sigGWAS_rs11993663_TNKS	6	4.44	chosen	1/6
NLGN4X	0.967	sigGWAS_rs12009217	1	ENSG00000146938	X	5920882	226022	1	sigGWAS_rs12009217_NLGN4X	2	1.934	chosen	1/2
FPGT	1	sigGWAS_rs12129573	1	ENSG00000254685	1	73768366	895556	2	sigGWAS_rs12129573_FPGT	2	2	chosen	1/2
PDE4B	0.464	sigGWAS_rs12129719	1	ENSG00000184588	1	66324512	66315	6	sigGWAS_rs12129719_PDE4B	9	4.176	chosen	1/9
TLE3	0.691	sigGWAS_rs12148337	1	ENSG00000140332	15	70589272	198757	4	sigGWAS_rs12148337_TLE3	10	6.91	chosen	1/10
OR8D4	0.252	sigGWAS_rs12293670	1	ENSG00000181518	11	124612932	835823	4	sigGWAS_rs12293670_OR8D4	20	5.04	chosen	1/20
NFKB2	0.286	sigGWAS_rs12416331	1	ENSG00000077150	10	104928914	774685	4	sigGWAS_rs12416331_NFKB2	20	5.72	chosen	1/20
METTL22	0.724	sigGWAS_rs12447542	1	ENSG00000067365	16	7744180	971360	2	sigGWAS_rs12447542_METTL22	2	1.448	chosen	1/2
GRM3	0.834	sigGWAS_rs12704290	1	ENSG00000198822	7	86427626	154396	1	sigGWAS_rs12704290_GRM3	8	6.672	chosen	1/8
LRRN3	0.403	sigGWAS_rs12705761	1	ENSG00000173114	7	110976264	245202	2	sigGWAS_rs12705761_LRRN3	4	1.612	chosen	1/4
KLHL29	1	sigGWAS_rs12712510	1	ENSG00000119771	2	22749726	858362	1	sigGWAS_rs12712510_KLHL29	1	1	chosen	1/1
VPS13C	0.637	sigGWAS_rs12898315	1	ENSG00000129003	15	61854003	498669	2	sigGWAS_rs12898315_VPS13C	5	3.185	chosen	1/5
AKAP13	0.476	sigGWAS_rs12908161	1	ENSG00000170776	15	85207825	569992	10	sigGWAS_rs12908161_AKAP13	10	4.76	chosen	1/10
ZEB2	0.996	sigGWAS_rs12991836	1	ENSG00000169554	2	145141541	140606	2	sigGWAS_rs12991836_ZEB2	2	1.992	chosen	1/2
UBE2D3	0.752	sigGWAS_rs13107325	1	ENSG00000109332	4	103188709	601344	6	sigGWAS_rs13107325_UBE2D3	11	8.272	chosen	1/11
GAB1	0.704	sigGWAS_rs13121251	1	ENSG00000109458	4	143829759	428156	3	sigGWAS_rs13121251_GAB1	6	4.224	chosen	1/6
CTNNA1	0.582	sigGWAS_rs13169274	1	ENSG00000044115	5	137855305	91351	20	sigGWAS_rs13169274_CTNNA1	20	11.64	chosen	1/20
TLE1	0.977	sigGWAS_rs1319017	1	ENSG00000196781	9	84736303	432083	1	sigGWAS_rs1319017_TLE1	3	2.931	chosen	1/3
RIMS1	0.646	sigGWAS_rs1339227	1	ENSG00000079841	6	73155701	559295	1	sigGWAS_rs1339227_RIMS1	7	4.522	chosen	1/7
FHIT	1	sigGWAS_rs1353545	1	ENSG00000189283	3	60287845	949288	1	sigGWAS_rs1353545_FHIT	1	1	chosen	1/1
CSMD1	1	sigGWAS_rs139425113	1	ENSG00000183117	8	4180611	671883	1	sigGWAS_rs139425113_CSMD1	1	1	chosen	1/1
FCGR1A	0.397	sigGWAS_rs140505938	1	ENSG00000150337	1	150031490	277263	3	sigGWAS_rs140505938_FCGR1A	20	7.94	chosen	1/20
CEP170	0.329	sigGWAS_rs14403	1	ENSG00000143702	1	243663893	245185	2	sigGWAS_rs14403_CEP170	8	2.632	chosen	1/8
SATB2	0.983	sigGWAS_rs1451488	1	ENSG00000119042	2	199990107	345882	1	sigGWAS_rs1451488_SATB2	4	3.932	chosen	1/4
OSBPL3	0.622	sigGWAS_rs146678232	1	ENSG00000070882	7	24777089	244164	4	sigGWAS_rs146678232_OSBPL3	7	4.354	chosen	1/7
CHD7	0.499	sigGWAS_rs1473594	1	ENSG00000171316	8	60696526	894811	4	sigGWAS_rs1473594_CHD7	4	1.996	chosen	1/4
DAAM1	0.607	sigGWAS_rs150437760	1	ENSG00000100592	14	59981768	326404	2	sigGWAS_rs150437760_DAAM1	11	6.677	chosen	1/11
MEF2C	0.996	sigGWAS_rs16867576	1	ENSG00000081189	5	88746331	546409	1	sigGWAS_rs16867576_MEF2C	2	1.992	chosen	1/2	MEF2C	MEF2C
FGF10	0.384	sigGWAS_rs16902086	1	ENSG00000070193	5	45285752	895944	1	sigGWAS_rs16902086_FGF10	3	1.152	chosen	1/3
CDH8	0.923	sigGWAS_rs17465671	1	ENSG00000150394	16	63712719	1641980	1	sigGWAS_rs17465671_CDH8	2	1.846	chosen	1/2
FES	0.384	sigGWAS_rs17514846	1	ENSG00000182511	15	91416550	10375	14	sigGWAS_rs17514846_FES	20	7.68	chosen	1/20
ARL14EP	0.376	sigGWAS_rs1765142	1	ENSG00000152219	11	30378559	33961	3	sigGWAS_rs1765142_ARL14EP	5	1.88	chosen	1/5
LUZP2	1	sigGWAS_rs1899543	1	ENSG00000187398	11	24406419	112097	1	sigGWAS_rs1899543_LUZP2	1	1	chosen	1/1
PARD6A	0.323	sigGWAS_rs1975802	1	ENSG00000102981	16	68285847	590996	13	sigGWAS_rs1975802_PARD6A	20	6.46	chosen	1/20
PRKCB	0.778	sigGWAS_rs198160	1	ENSG00000166501	16	24240725	393403	12	sigGWAS_rs198160_PRKCB	19	14.782	chosen	1/19
CACNA1C	0.479	sigGWAS_rs2007044	1	ENSG00000151067	12	2344960	265008	7	sigGWAS_rs2007044_CACNA1C	15	7.185	chosen	1/15
ZNF536	0.956	sigGWAS_rs2053079	1	ENSG00000198597	19	30987423	124095	7	sigGWAS_rs2053079_ZNF536	8	7.648	chosen	1/8
ALMS1	0.855	sigGWAS_rs2077586	1	ENSG00000116127	2	73161551	451335	13	sigGWAS_rs2077586_ALMS1	20	17.1	chosen	1/20
LRRN3	1	sigGWAS_rs211829	1	ENSG00000173114	7	110048893	682169	1	sigGWAS_rs211829_LRRN3	1	1	chosen	1/1
PPARGC1A	0.941	sigGWAS_rs215411	1	ENSG00000109819	4	23423603	482109	3	sigGWAS_rs215411_PPARGC1A	3	2.823	chosen	1/3
HYDIN	0.256	sigGWAS_rs2161711	1	ENSG00000157423	16	71359066	94441	9	sigGWAS_rs2161711_HYDIN	20	5.12	chosen	1/20
PRSS35	0.473	sigGWAS_rs217287	1	ENSG00000146250	6	84407466	185272	6	sigGWAS_rs217287_PRSS35	10	4.73	chosen	1/10
RGS6	0.334	sigGWAS_rs2332700	1	ENSG00000182732	14	72417326	102003	2	sigGWAS_rs2332700_RGS6	4	1.336	chosen	1/4
PSD3	0.395	sigGWAS_rs2410572	1	ENSG00000156011	8	18421474	520766	8	sigGWAS_rs2410572_PSD3	9	3.555	chosen	1/9
NCAM1	0.442	sigGWAS_rs2514218	1	ENSG00000149294	11	113392994	560997	1	sigGWAS_rs2514218_NCAM1	15	6.63	chosen	1/15
MEF2C	0.997	sigGWAS_rs254782	1	ENSG00000081189	5	88000630	199292	2	sigGWAS_rs254782_MEF2C	2	1.994	chosen	1/2	MEF2C	MEF2C
DPYD	0.994	sigGWAS_rs2660304	1	ENSG00000188641	1	98512127	125522	1	sigGWAS_rs2660304_DPYD	2	1.988	chosen	1/2
SEMA6D	0.481	sigGWAS_rs281299	1	ENSG00000137872	15	47686081	209783	1	sigGWAS_rs281299_SEMA6D	6	2.886	chosen	1/6
BRINP3	1	sigGWAS_rs28374258	1	ENSG00000162670	1	190949551	502792	1	sigGWAS_rs28374258_BRINP3	1	1	chosen	1/1
MPHOSPH9	0.262	sigGWAS_rs2851447	1	ENSG00000051825	12	123665113	63448	19	sigGWAS_rs2851447_MPHOSPH9	20	5.24	chosen	1/20
UPF1	0.358	sigGWAS_rs2905432	1	ENSG00000005007	19	19484295	541551	15	sigGWAS_rs2905432_UPF1	20	7.16	chosen	1/20
OPCML	1	sigGWAS_rs2917569	1	ENSG00000183715	11	132568255	834159	1	sigGWAS_rs2917569_OPCML	1	1	chosen	1/1
AOX1	0.463	sigGWAS_rs2949006	1	ENSG00000138356	2	200715388	735203	8	sigGWAS_rs2949006_AOX1	9	4.167	chosen	1/9
YBX1	0.333	sigGWAS_rs2970610	1	ENSG00000065978	1	44097530	949432	2	sigGWAS_rs2970610_YBX1	20	6.66	chosen	1/20
PBRM1	0.218	sigGWAS_rs312477	1	ENSG00000163939	3	53515136	795203	3	sigGWAS_rs312477_PBRM1	20	4.36	chosen	1/20
ZKSCAN3	0.158	sigGWAS_rs3130820	1	ENSG00000189298	6	29206683	888992	5	sigGWAS_rs3130820_ZKSCAN3	20	3.16	chosen	1/20
AKAP6	0.679	sigGWAS_rs34179565	1	ENSG00000151320	14	33298731	500252	2	sigGWAS_rs34179565_AKAP6	3	2.037	chosen	1/3
RERE	0.39	sigGWAS_rs34269918	1	ENSG00000142599	1	8424984	452718	8	sigGWAS_rs34269918_RERE	15	5.85	chosen	1/15	RERE
CCDC39	0.53	sigGWAS_rs34796896	1	ENSG00000145075	3	180623255	34462	3	sigGWAS_rs34796896_CCDC39	6	3.18	chosen	1/6
CNTN4	0.528	sigGWAS_rs35346733	1	ENSG00000144619	3	2521322	380825	1	sigGWAS_rs35346733_CNTN4	4	2.112	chosen	1/4
EML1	0.351	sigGWAS_rs35604463	1	ENSG00000066629	14	99712032	491998	8	sigGWAS_rs35604463_EML1	11	3.861	chosen	1/11
LAMA2	0.991	sigGWAS_rs35736453	1	ENSG00000196569	6	128329493	874793	9	sigGWAS_rs35736453_LAMA2	9	8.919	chosen	1/9
NTM	0.31	sigGWAS_rs35774874	1	ENSG00000182667	11	130811356	429017	9	sigGWAS_rs35774874_NTM	9	2.79	chosen	1/9
SYBU	0.966	sigGWAS_rs36043959	1	ENSG00000147642	8	111472014	767994	2	sigGWAS_rs36043959_SYBU	3	2.898	chosen	1/3
NUP37	0.481	sigGWAS_rs36104021	1	ENSG00000075188	12	103361112	847210	2	sigGWAS_rs36104021_NUP37	13	6.253	chosen	1/13
DGKI	0.6	sigGWAS_rs3735025	1	ENSG00000157680	7	137074844	456994	3	sigGWAS_rs3735025_DGKI	5	3	chosen	1/5
LINGO1	0.191	sigGWAS_rs3743078	1	ENSG00000169783	15	78894759	781517	1	sigGWAS_rs3743078_LINGO1	20	3.82	chosen	1/20
INPP5D	0.521	sigGWAS_rs4144797	1	ENSG00000168918	2	233562197	362480	20	sigGWAS_rs4144797_INPP5D	20	10.42	chosen	1/20
BTG1	0.812	sigGWAS_rs4240748	1	ENSG00000133639	12	92246786	292887	6	sigGWAS_rs4240748_BTG1	10	8.12	chosen	1/10
CNGB1	0.293	sigGWAS_rs42945	1	ENSG00000070729	16	58545426	540406	8	sigGWAS_rs42945_CNGB1	20	5.86	chosen	1/20
PRSS35	0.457	sigGWAS_rs4470825	1	ENSG00000146250	6	83789798	432396	8	sigGWAS_rs4470825_PRSS35	11	5.027	chosen	1/11
SKI	0.207	sigGWAS_rs4648845	1	ENSG00000157933	1	2387101	226967	19	sigGWAS_rs4648845_SKI	20	4.14	chosen	1/20
PAPPA2	0.886	sigGWAS_rs4650963	1	ENSG00000116183	1	177309490	877183	1	sigGWAS_rs4650963_PAPPA2	5	4.43	chosen	1/5
ATP2A2	0.234	sigGWAS_rs4766428	1	ENSG00000174437	12	110723245	4684	15	sigGWAS_rs4766428_ATP2A2	20	4.68	chosen	1/20
NMD3	0.285	sigGWAS_rs489939	1	ENSG00000169251	3	161470592	648108	3	sigGWAS_rs489939_NMD3	5	1.425	chosen	1/5
LLGL1	0.346	sigGWAS_rs4925114	1	ENSG00000131899	17	17711270	417631	19	sigGWAS_rs4925114_LLGL1	20	6.92	chosen	1/20
B3GAT1	0.438	sigGWAS_rs4936215	1	ENSG00000109956	11	133852684	429128	11	sigGWAS_rs4936215_B3GAT1	11	4.818	chosen	1/11
DUSP26	0.715	sigGWAS_rs55669358	1	ENSG00000133878	8	34312412	854788	5	sigGWAS_rs55669358_DUSP26	6	4.29	chosen	1/6
ALMS1	0.854	sigGWAS_rs56145559	1	ENSG00000116127	2	73623439	10553	12	sigGWAS_rs56145559_ALMS1	20	17.08	chosen	1/20
THBS1	0.751	sigGWAS_rs56282503	1	ENSG00000137801	15	40566759	693479	1	sigGWAS_rs56282503_THBS1	20	15.02	chosen	1/20
NFATC1	0.432	sigGWAS_rs56775891	1	ENSG00000131196	18	77575613	419841	3	sigGWAS_rs56775891_NFATC1	11	4.752	chosen	1/11
ZEB2	0.992	sigGWAS_rs56807175	1	ENSG00000169554	2	146436222	1154075	2	sigGWAS_rs56807175_ZEB2	2	1.984	chosen	1/2
SUN2	0.449	sigGWAS_rs5757730	1	ENSG00000100242	22	39967430	777282	5	sigGWAS_rs5757730_SUN2	20	8.98	chosen	1/20
TSNARE1	0.5	sigGWAS_rs58033671	1	ENSG00000171045	8	143320118	164483	3	sigGWAS_rs58033671_TSNARE1	20	10	chosen	1/20
TCF4	0.69	sigGWAS_rs5825114	1	ENSG00000196628	18	52749216	582802	8	sigGWAS_rs5825114_TCF4	8	5.52	chosen	1/8
NRXN2	0.262	sigGWAS_rs58950470	1	ENSG00000110076	11	65383755	893095	1	sigGWAS_rs58950470_NRXN2	20	5.24	chosen	1/20
TNFRSF13C	0.866	sigGWAS_rs6002655	1	ENSG00000159958	22	42603814	280992	19	sigGWAS_rs6002655_TNFRSF13C	20	17.32	chosen	1/20
RALGAPA2	0.491	sigGWAS_rs6035706	1	ENSG00000188559	20	20821005	127739	5	sigGWAS_rs6035706_RALGAPA2	8	3.928	chosen	1/8
TGM2	0.757	sigGWAS_rs6065094	1	ENSG00000198959	20	37453194	658214	4	sigGWAS_rs6065094_TGM2	15	11.355	chosen	1/15
NACA	0.181	sigGWAS_rs61937595	1	ENSG00000196531	12	57682956	557544	15	sigGWAS_rs61937595_NACA	20	3.62	chosen	1/20
GPM6A	0.927	sigGWAS_rs62334820	1	ENSG00000150625	4	176855221	68594	1	sigGWAS_rs62334820_GPM6A	6	5.562	chosen	1/6
PJA1	0.336	sigGWAS_rs62606711	1	ENSG00000181191	X	68377204	8160	5	sigGWAS_rs62606711_PJA1	10	3.36	chosen	1/10
EPHA7	0.946	sigGWAS_rs634940	1	ENSG00000135333	6	93077500	1051765	2	sigGWAS_rs634940_EPHA7	2	1.892	chosen	1/2
SF3B1	0.457	sigGWAS_rs6434928	1	ENSG00000115524	2	198304577	4762	7	sigGWAS_rs6434928_SF3B1	15	6.855	chosen	1/15
KIF14	0.523	sigGWAS_rs6678676	1	ENSG00000118193	1	200266503	323359	3	sigGWAS_rs6678676_KIF14	12	6.276	chosen	1/12
F3	0.327	sigGWAS_rs6680011	1	ENSG00000117525	1	95840866	833510	2	sigGWAS_rs6680011_F3	7	2.289	chosen	1/7
LLGL1	0.358	sigGWAS_rs66885728	1	ENSG00000131899	17	19014831	885930	2	sigGWAS_rs66885728_LLGL1	20	7.16	chosen	1/20
PTPRU	0.586	sigGWAS_rs6694545	1	ENSG00000060656	1	30437268	874240	4	sigGWAS_rs6694545_PTPRU	7	4.102	chosen	1/7
PRDX6	0.756	sigGWAS_rs6701877	1	ENSG00000117592	1	174015259	568854	3	sigGWAS_rs6701877_PRDX6	15	11.34	chosen	1/15
FANCD2	0.209	sigGWAS_rs6800435	1	ENSG00000144554	3	10804551	736453	13	sigGWAS_rs6800435_FANCD2	20	4.18	chosen	1/20
MMP16	1	sigGWAS_rs7010876	1	ENSG00000156103	8	89264751	75503	2	sigGWAS_rs7010876_MMP16	2	2	chosen	1/2
ADAMTS9	0.476	sigGWAS_rs704373	1	ENSG00000163638	3	63867355	806321	7	sigGWAS_rs704373_ADAMTS9	7	3.332	chosen	1/7
ZDHHC5	0.874	sigGWAS_rs7129727	1	ENSG00000156599	11	57484660	49441	20	sigGWAS_rs7129727_ZDHHC5	20	17.48	chosen	1/20
GRIN2A	0.849	sigGWAS_rs7191183	1	ENSG00000183454	16	9900057	376554	4	sigGWAS_rs7191183_GRIN2A	8	6.792	chosen	1/8
RPA1	0.277	sigGWAS_rs7216638	1	ENSG00000132383	17	2156453	423457	17	sigGWAS_rs7216638_RPA1	20	5.54	chosen	1/20
BAIAP2	0.406	sigGWAS_rs7225476	1	ENSG00000175866	17	78561603	447345	18	sigGWAS_rs7225476_BAIAP2	20	8.12	chosen	1/20	BAIAP2	BAIAP2
UTRN	0.711	sigGWAS_rs72342102	1	ENSG00000152818	6	143650824	956013	12	sigGWAS_rs72342102_UTRN	12	8.532	chosen	1/12
CHRM3	0.977	sigGWAS_rs72769124	1	ENSG00000133019	1	239210058	339807	1	sigGWAS_rs72769124_CHRM3	2	1.954	chosen	1/2
LDLR	0.233	sigGWAS_rs72986630	1	ENSG00000130164	19	11849736	649698	7	sigGWAS_rs72986630_LDLR	20	4.66	chosen	1/20
STAG1	0.781	sigGWAS_rs7432375	1	ENSG00000118007	3	136288405	182815	4	sigGWAS_rs7432375_STAG1	7	5.467	chosen	1/7
MKL2	0.94	sigGWAS_rs7499750	1	ENSG00000186260	16	13749265	415913	4	sigGWAS_rs7499750_MKL2	6	5.64	chosen	1/6
NUCB1	0.246	sigGWAS_rs7508148	1	ENSG00000104805	19	50152142	748835	13	sigGWAS_rs7508148_NUCB1	20	4.92	chosen	1/20
VRK2	0.787	sigGWAS_rs7596038	1	ENSG00000028116	2	58383820	249034	1	sigGWAS_rs7596038_VRK2	2	1.574	chosen	1/2
LRRFIP2	0.275	sigGWAS_rs75968099	1	ENSG00000093167	3	36858583	366597	6	sigGWAS_rs75968099_LRRFIP2	9	2.475	chosen	1/9
MARCKS	0.714	sigGWAS_rs760608	1	ENSG00000155130	6	114719447	540906	1	sigGWAS_rs760608_MARCKS	3	2.142	chosen	1/3
RYBP	0.518	sigGWAS_rs7632921	1	ENSG00000163602	3	71543758	952311	5	sigGWAS_rs7632921_RYBP	5	2.59	chosen	1/5
PDE4D	0.963	sigGWAS_rs7701440	1	ENSG00000113448	5	60620980	803033	1	sigGWAS_rs7701440_PDE4D	9	8.667	chosen	1/9
EMB	0.685	sigGWAS_rs77853293	1	ENSG00000170571	5	49840113	101031	1	sigGWAS_rs77853293_EMB	3	2.055	chosen	1/3
SRPK2	0.428	sigGWAS_rs7789569	1	ENSG00000135250	7	104927586	112169	3	sigGWAS_rs7789569_SRPK2	10	4.28	chosen	1/10
MKLN1	0.787	sigGWAS_rs7801375	1	ENSG00000128585	7	131567263	772408	1	sigGWAS_rs7801375_MKLN1	3	2.361	chosen	1/3
HOMER2	0.227	sigGWAS_rs783540	1	ENSG00000103942	15	83254708	399953	10	sigGWAS_rs783540_HOMER2	16	3.632	chosen	1/16
CACNB2	0.744	sigGWAS_rs7893279	1	ENSG00000165995	10	18745105	315499	4	sigGWAS_rs7893279_CACNB2	6	4.464	chosen	1/6
LRP4	0.571	sigGWAS_rs7951870	1	ENSG00000134569	11	46373311	566882	20	sigGWAS_rs7951870_LRP4	20	11.42	chosen	1/20	LRP4
B3GAT1	0.462	sigGWAS_rs893949	1	ENSG00000109956	11	134296384	14572	11	sigGWAS_rs893949_B3GAT1	11	5.082	chosen	1/11
POU4F1	0.578	sigGWAS_rs9545047	1	ENSG00000152192	13	79859456	681783	1	sigGWAS_rs9545047_POU4F1	4	2.312	chosen	1/4
EP300	0.844	sigGWAS_rs9607782	1	ENSG00000100393	22	41587556	99766	10	sigGWAS_rs9607782_EP300	20	16.88	chosen	1/20
DPH3	0.335	sigGWAS_rs9881798	1	ENSG00000154813	3	16846967	540488	3	sigGWAS_rs9881798_DPH3	7	2.345	chosen	1/7
UBR5	0.525	subGWAS_rs10106298	1	ENSG00000104517	8	103688381	263312	3	subGWAS_rs10106298_UBR5	13	6.825	chosen	1/13
CREB3	0.213	subGWAS_rs10124101	1	ENSG00000107175	9	36308827	576495	11	subGWAS_rs10124101_CREB3	20	4.26	chosen	1/20
IGF2BP3	0.297	subGWAS_rs10262624	1	ENSG00000136231	7	23915676	405590	6	subGWAS_rs10262624_IGF2BP3	13	3.861	chosen	1/13
NMD3	0.211	subGWAS_rs10470477	1	ENSG00000169251	3	160903774	81290	9	subGWAS_rs10470477_NMD3	11	2.321	chosen	1/11
UFL1	0.99	subGWAS_rs10544666	1	ENSG00000014123	6	97397200	427729	2	subGWAS_rs10544666_UFL1	7	6.93	chosen	1/7
SLC9A8	0.352	subGWAS_rs10547611	1	ENSG00000197818	20	47530801	898449	10	subGWAS_rs10547611_SLC9A8	10	3.52	chosen	1/10
EEF1D	0.53	subGWAS_rs10552126	1	ENSG00000104529	8	144844056	162345	19	subGWAS_rs10552126_EEF1D	20	10.6	chosen	1/20
AVEN	0.526	subGWAS_rs10718217	1	ENSG00000169857	15	34656627	325250	1	subGWAS_rs10718217_AVEN	16	8.416	chosen	1/16
PLXNC1	0.807	subGWAS_rs10745694	1	ENSG00000136040	12	95181478	638979	1	subGWAS_rs10745694_PLXNC1	9	7.263	chosen	1/9
PPIP5K1	0.255	subGWAS_rs1079309	1	ENSG00000168781	15	43783164	199119	20	subGWAS_rs1079309_PPIP5K1	20	5.1	chosen	1/20
UBE2Q1	0.497	subGWAS_rs10796933	1	ENSG00000160714	1	154789036	257532	20	subGWAS_rs10796933_UBE2Q1	20	9.94	chosen	1/20
PHLDA1	0.345	subGWAS_rs10862476	1	ENSG00000139289	12	77133805	706093	1	subGWAS_rs10862476_PHLDA1	7	2.415	chosen	1/7
CR1L	0.292	subGWAS_rs10863593	1	ENSG00000197721	1	208018074	199616	14	subGWAS_rs10863593_CR1L	17	4.964	chosen	1/17
CAND1	0.707	subGWAS_rs10878577	1	ENSG00000111530	12	67593841	69220	3	subGWAS_rs10878577_CAND1	5	3.535	chosen	1/5
TEK	0.957	subGWAS_rs10967586	1	ENSG00000120156	9	26895808	213331	5	subGWAS_rs10967586_TEK	9	8.613	chosen	1/9
IKBIP	0.798	subGWAS_rs11109785	1	ENSG00000166130	12	99656023	617132	3	subGWAS_rs11109785_IKBIP	8	6.384	chosen	1/8
TFRC	0.242	subGWAS_rs111770664	1	ENSG00000072274	3	196046921	237861	7	subGWAS_rs111770664_TFRC	20	4.84	chosen	1/20
GSTO1	0.393	subGWAS_rs11192193	1	ENSG00000148834	10	106569253	574139	6	subGWAS_rs11192193_GSTO1	9	3.537	chosen	1/9
AGBL4	0.868	subGWAS_rs11205624	1	ENSG00000186094	1	49867034	622551	2	subGWAS_rs11205624_AGBL4	4	3.472	chosen	1/4
CASP4	0.471	subGWAS_rs11226509	1	ENSG00000196954	11	104673660	166503	4	subGWAS_rs11226509_CASP4	10	4.71	chosen	1/10
TNFRSF19	0.367	subGWAS_rs113035110	1	ENSG00000127863	13	23572171	572338	3	subGWAS_rs113035110_TNFRSF19	5	1.835	chosen	1/5
AEBP1	0.187	subGWAS_rs11308115	1	ENSG00000106624	7	44613611	469651	11	subGWAS_rs11308115_AEBP1	20	3.74	chosen	1/20
CUL7	0.312	subGWAS_rs113113059	1	ENSG00000044090	6	43160375	138692	18	subGWAS_rs113113059_CUL7	20	6.24	chosen	1/20	CUL7	CUL7
KIT	0.307	subGWAS_rs1132998	1	ENSG00000157404	4	54966919	557166	7	subGWAS_rs1132998_KIT	7	2.149	chosen	1/7
PSMD9	0.324	subGWAS_rs11415678	1	ENSG00000110801	12	122920078	593441	8	subGWAS_rs11415678_PSMD9	20	6.48	chosen	1/20
XPR1	0.865	subGWAS_rs11487432	1	ENSG00000143324	1	180634944	33804	8	subGWAS_rs11487432_XPR1	13	11.245	chosen	1/13
KIF14	0.469	subGWAS_rs11583328	1	ENSG00000118193	1	201002173	412311	2	subGWAS_rs11583328_KIF14	20	9.38	chosen	1/20
STK32B	0.192	subGWAS_rs115846182	1	ENSG00000152953	4	4468864	584305	10	subGWAS_rs115846182_STK32B	10	1.92	chosen	1/10
SLITRK1	1	subGWAS_rs11617058	1	ENSG00000178235	13	85293112	836584	1	subGWAS_rs11617058_SLITRK1	1	1	chosen	1/1
GPHN	0.65	subGWAS_rs11625793	1	ENSG00000171723	14	66315883	658242	8	subGWAS_rs11625793_GPHN	8	5.2	chosen	1/8
PID1	0.619	subGWAS_rs11688570	1	ENSG00000153823	2	229317492	818509	7	subGWAS_rs11688570_PID1	7	4.333	chosen	1/7
TRPS1	1	subGWAS_rs11778934	1	ENSG00000104447	8	116551405	270494	1	subGWAS_rs11778934_TRPS1	1	1	chosen	1/1
ELAVL2	0.977	subGWAS_rs11795350	1	ENSG00000107105	9	23678879	147456	1	subGWAS_rs11795350_ELAVL2	2	1.954	chosen	1/2
CAPN9	0.216	subGWAS_rs11807834	1	ENSG00000135773	1	230272624	610506	14	subGWAS_rs11807834_CAPN9	18	3.888	chosen	1/18
FBN1	0.472	subGWAS_rs11854184	1	ENSG00000166147	15	49293194	355148	6	subGWAS_rs11854184_FBN1	15	7.08	chosen	1/15
LRP8	0.599	subGWAS_rs12031155	1	ENSG00000157193	1	53714139	79603	17	subGWAS_rs12031155_LRP8	20	11.98	chosen	1/20	LRP8	LRP8
POU2F1	0.349	subGWAS_rs12123801	1	ENSG00000143190	1	166561495	628571	12	subGWAS_rs12123801_POU2F1	14	4.886	chosen	1/14
NGF	0.347	subGWAS_rs12134493	1	ENSG00000134259	1	115677946	202911	12	subGWAS_rs12134493_NGF	17	5.899	chosen	1/17
C1orf185	0.388	subGWAS_rs12138061	1	ENSG00000204006	1	50572096	995810	6	subGWAS_rs12138061_C1orf185	6	2.328	chosen	1/6
RAB30	0.84	subGWAS_rs12294291	1	ENSG00000137502	11	83197722	414757	4	subGWAS_rs12294291_RAB30	7	5.88	chosen	1/7
RCOR1	0.225	subGWAS_rs12432904	1	ENSG00000089902	14	103812320	753322	4	subGWAS_rs12432904_RCOR1	20	4.5	chosen	1/20
TTN	0.948	subGWAS_rs12463394	1	ENSG00000155657	2	180327237	631708	3	subGWAS_rs12463394_TTN	7	6.636	chosen	1/7
DPYSL5	0.247	subGWAS_rs12474906	1	ENSG00000157851	2	28033538	962923	1	subGWAS_rs12474906_DPYSL5	20	4.94	chosen	1/20
GRIA1	0.249	subGWAS_rs12523627	1	ENSG00000155511	5	153459405	590230	1	subGWAS_rs12523627_GRIA1	12	2.988	chosen	1/12
CYFIP2	0.725	subGWAS_rs12652777	1	ENSG00000055163	5	155775075	918014	8	subGWAS_rs12652777_CYFIP2	9	6.525	chosen	1/9
CDCA7L	0.846	subGWAS_rs12672629	1	ENSG00000164649	7	21531831	453871	5	subGWAS_rs12672629_CDCA7L	6	5.076	chosen	1/6
KLF12	0.902	subGWAS_rs12877581	1	ENSG00000118922	13	74325499	382895	4	subGWAS_rs12877581_KLF12	4	3.608	chosen	1/4
ALDH1A2	0.529	subGWAS_rs12911832	1	ENSG00000128918	15	58985904	195839	1	subGWAS_rs12911832_ALDH1A2	14	7.406	chosen	1/14
RGMA	0.593	subGWAS_rs12914508	1	ENSG00000182175	15	93455982	176451	5	subGWAS_rs12914508_RGMA	6	3.558	chosen	1/6
CEBPA	0.252	subGWAS_rs12985481	1	ENSG00000245848	19	33897669	104199	14	subGWAS_rs12985481_CEBPA	20	5.04	chosen	1/20
PCDH7	1	subGWAS_rs13145415	1	ENSG00000169851	4	30823157	101120	1	subGWAS_rs13145415_PCDH7	1	1	chosen	1/1
RELN	0.655	subGWAS_rs13238946	1	ENSG00000189056	7	104096791	466828	1	subGWAS_rs13238946_RELN	5	3.275	chosen	1/5	RELN	RELN
CDK5RAP2	0.831	subGWAS_rs1360695	1	ENSG00000136861	9	122549086	793362	2	subGWAS_rs1360695_CDK5RAP2	3	2.493	chosen	1/3
CD53	0.353	subGWAS_rs1389724	1	ENSG00000143119	1	111356841	58931	15	subGWAS_rs1389724_CD53	20	7.06	chosen	1/20
PTBP2	1	subGWAS_rs139283246	1	ENSG00000117569	1	97120607	66614	1	subGWAS_rs139283246_PTBP2	1	1	chosen	1/1
CCDC50	0.506	subGWAS_rs140130327	1	ENSG00000152492	3	191341579	294713	4	subGWAS_rs140130327_CCDC50	5	2.53	chosen	1/5
ASAP1	0.944	subGWAS_rs140364301	1	ENSG00000153317	8	131274703	181203	3	subGWAS_rs140364301_ASAP1	4	3.776	chosen	1/4	ASAP1	ASAP1
ARRDC3	1	subGWAS_rs141884226	1	ENSG00000113369	5	91381947	702771	1	subGWAS_rs141884226_ARRDC3	1	1	chosen	1/1
DMD	1	subGWAS_rs145393289	1	ENSG00000198947	X	32855282	502276	1	subGWAS_rs145393289_DMD	1	1	chosen	1/1
NCAM2	1	subGWAS_rs1482419	1	ENSG00000154654	21	22117491	253142	1	subGWAS_rs1482419_NCAM2	1	1	chosen	1/1
SPTBN1	0.309	subGWAS_rs148661029	1	ENSG00000115306	2	54972226	288804	9	subGWAS_rs148661029_SPTBN1	17	5.253	chosen	1/17
NIPBL	0.893	subGWAS_rs1549250	1	ENSG00000164190	5	37821221	944360	1	subGWAS_rs1549250_NIPBL	7	6.251	chosen	1/7
CPS1	0.751	subGWAS_rs16846200	1	ENSG00000021826	2	212311744	969338	2	subGWAS_rs16846200_CPS1	2	1.502	chosen	1/2
CDCA7	0.484	subGWAS_rs17320820	1	ENSG00000144354	2	175163818	944270	1	subGWAS_rs17320820_CDCA7	11	5.324	chosen	1/11
TAF6	0.173	subGWAS_rs1734907	1	ENSG00000106290	7	100315517	598053	14	subGWAS_rs1734907_TAF6	20	3.46	chosen	1/20
EXT1	0.795	subGWAS_rs17668001	1	ENSG00000182197	8	118557476	566616	7	subGWAS_rs17668001_EXT1	7	5.565	chosen	1/7
KLF6	0.994	subGWAS_rs17731	1	ENSG00000067082	10	3821561	5912	3	subGWAS_rs17731_KLF6	3	2.982	chosen	1/3
PITPNM1	0.576	subGWAS_rs182366314	1	ENSG00000110697	11	68243430	969696	2	subGWAS_rs182366314_PITPNM1	20	11.52	chosen	1/20
ETV5	0.452	subGWAS_rs1862906	1	ENSG00000244405	3	185675973	152134	9	subGWAS_rs1862906_ETV5	20	9.04	chosen	1/20
RGS7BP	0.652	subGWAS_rs1903305	1	ENSG00000186479	5	63736385	65699	3	subGWAS_rs1903305_RGS7BP	6	3.912	chosen	1/6
FZD10	0.719	subGWAS_rs1915485	1	ENSG00000111432	12	129885628	761376	4	subGWAS_rs1915485_FZD10	5	3.595	chosen	1/5
PDHA2	1	subGWAS_rs1922857	1	ENSG00000163114	4	97652057	890818	1	subGWAS_rs1922857_PDHA2	1	1	chosen	1/1
DCAF12L1	1	subGWAS_rs192723772	1	ENSG00000198889	X	125807960	121126	2	subGWAS_rs192723772_DCAF12L1	3	3	chosen	1/3
SUDS3	0.34	subGWAS_rs1995357	1	ENSG00000111707	12	117945315	868870	15	subGWAS_rs1995357_SUDS3	15	5.1	chosen	1/15
KIF5C	0.501	subGWAS_rs200327371	1	ENSG00000168280	2	149429178	203641	5	subGWAS_rs200327371_KIF5C	7	3.507	chosen	1/7
GPR153	0.293	subGWAS_rs200448	1	ENSG00000158292	1	6701978	380943	8	subGWAS_rs200448_GPR153	20	5.86	chosen	1/20
SOX6	0.411	subGWAS_rs2008905	1	ENSG00000110693	11	17184623	423485	1	subGWAS_rs2008905_SOX6	16	6.576	chosen	1/16
MBL2	1	subGWAS_rs201619937	1	ENSG00000165471	10	55511085	979625	1	subGWAS_rs201619937_MBL2	1	1	chosen	1/1
FZD5	0.574	subGWAS_rs201633612	1	ENSG00000163251	2	208519446	114841	9	subGWAS_rs201633612_FZD5	18	10.332	chosen	1/18
GLDC	0.49	subGWAS_rs2026714	1	ENSG00000178445	9	7177284	531634	4	subGWAS_rs2026714_GLDC	6	2.94	chosen	1/6
FYN	0.558	subGWAS_rs2038014	1	ENSG00000010810	6	111897865	296790	9	subGWAS_rs2038014_FYN	14	7.812	chosen	1/14	FYN
P2RX5	0.261	subGWAS_rs2085045	1	ENSG00000083454	17	4040675	440977	18	subGWAS_rs2085045_P2RX5	20	5.22	chosen	1/20
ADCY9	0.467	subGWAS_rs2270366	1	ENSG00000162104	16	4558615	392429	6	subGWAS_rs2270366_ADCY9	20	9.34	chosen	1/20
OR4N2	0.37	subGWAS_rs2319380	1	ENSG00000176294	14	21147845	960671	1	subGWAS_rs2319380_OR4N2	20	7.4	chosen	1/20
SLC8A3	0.381	subGWAS_rs2526882	1	ENSG00000100678	14	71374702	718915	1	subGWAS_rs2526882_SLC8A3	11	4.191	chosen	1/11
CXADR	0.882	subGWAS_rs2824007	1	ENSG00000154639	21	18113064	771636	1	subGWAS_rs2824007_CXADR	2	1.764	chosen	1/2
ARHGEF10	0.741	subGWAS_rs28416291	1	ENSG00000104728	8	3078731	1306589	3	subGWAS_rs28416291_ARHGEF10	6	4.446	chosen	1/6
LRRTM4	1	subGWAS_rs2861076	1	ENSG00000176204	2	77703418	117027	1	subGWAS_rs2861076_LRRTM4	1	1	chosen	1/1
RTN4	0.419	subGWAS_rs2868985	1	ENSG00000115310	2	56191470	851713	1	subGWAS_rs2868985_RTN4	9	3.771	chosen	1/9
CACNA2D1	0.734	subGWAS_rs2888019	1	ENSG00000153956	7	82503409	430295	1	subGWAS_rs2888019_CACNA2D1	3	2.202	chosen	1/3
CXXC4	0.483	subGWAS_rs2905627	1	ENSG00000168772	4	105450085	34027	2	subGWAS_rs2905627_CXXC4	4	1.932	chosen	1/4
POM121	0.578	subGWAS_rs2944815	1	ENSG00000196313	7	71811748	538188	3	subGWAS_rs2944815_POM121	7	4.046	chosen	1/7
NUDT12	1	subGWAS_rs3074391	1	ENSG00000112874	5	103596149	697655	1	subGWAS_rs3074391_NUDT12	1	1	chosen	1/1
KRT4	0.937	subGWAS_rs3214023	1	ENSG00000170477	12	53682986	474651	20	subGWAS_rs3214023_KRT4	20	18.74	chosen	1/20
NETO1	0.798	subGWAS_rs337718	1	ENSG00000166342	18	69774278	760906	2	subGWAS_rs337718_NETO1	2	1.596	chosen	1/2
MPHOSPH9	0.3	subGWAS_rs34102591	1	ENSG00000051825	12	124480801	752240	2	subGWAS_rs34102591_MPHOSPH9	20	6	chosen	1/20
SPEG	0.742	subGWAS_rs34375916	1	ENSG00000072195	2	221269370	969802	3	subGWAS_rs34375916_SPEG	11	8.162	chosen	1/11
DPP4	0.417	subGWAS_rs34685708	1	ENSG00000197635	2	162828729	102323	5	subGWAS_rs34685708_DPP4	10	4.17	chosen	1/10
HNMT	0.559	subGWAS_rs34730157	1	ENSG00000150540	2	139205671	484081	1	subGWAS_rs34730157_HNMT	3	1.677	chosen	1/3
ZNF521	0.531	subGWAS_rs34777351	1	ENSG00000198795	18	23106223	174009	1	subGWAS_rs34777351_ZNF521	4	2.124	chosen	1/4
MATR3	0.484	subGWAS_rs35123781	1	ENSG00000015479	5	139065180	455739	3	subGWAS_rs35123781_MATR3	20	9.68	chosen	1/20
SND1	0.891	subGWAS_rs35297615	1	ENSG00000197157	7	127284269	7965	7	subGWAS_rs35297615_SND1	14	12.474	chosen	1/14
TMEFF2	0.485	subGWAS_rs35610290	1	ENSG00000144339	2	194378903	1318468	3	subGWAS_rs35610290_TMEFF2	3	1.455	chosen	1/3
ACVR2A	0.679	subGWAS_rs35662245	1	ENSG00000121989	2	147583187	1018899	1	subGWAS_rs35662245_ACVR2A	4	2.716	chosen	1/4
SELPLG	0.18	subGWAS_rs3764002	1	ENSG00000110876	12	108618630	409105	11	subGWAS_rs3764002_SELPLG	19	3.42	chosen	1/19
ITPKB	0.31	subGWAS_rs41314284	1	ENSG00000143772	1	226790001	137023	15	subGWAS_rs41314284_ITPKB	19	5.89	chosen	1/19
RB1CC1	0.974	subGWAS_rs4425746	1	ENSG00000023287	8	52662717	995686	5	subGWAS_rs4425746_RB1CC1	5	4.87	chosen	1/5
JAM2	0.97	subGWAS_rs4484102	1	ENSG00000154721	21	25103088	1908496	2	subGWAS_rs4484102_JAM2	2	1.94	chosen	1/2
NFIB	0.768	subGWAS_rs4615688	1	ENSG00000147862	9	14505861	106879	1	subGWAS_rs4615688_NFIB	6	4.608	chosen	1/6
PCDH17	1	subGWAS_rs4627212	1	ENSG00000118946	13	58822051	616107	1	subGWAS_rs4627212_PCDH17	1	1	chosen	1/1
DCC	1	subGWAS_rs4632195	1	ENSG00000187323	18	50746748	879590	1	subGWAS_rs4632195_DCC	1	1	chosen	1/1	DCC	DCC
UFL1	0.988	subGWAS_rs474447	1	ENSG00000014123	6	96439030	530441	3	subGWAS_rs474447_UFL1	7	6.916	chosen	1/7
NHLRC3	0.31	subGWAS_rs478606	1	ENSG00000188811	13	38861081	751362	7	subGWAS_rs478606_NHLRC3	7	2.17	chosen	1/7
TRPM6	0.617	subGWAS_rs500102	1	ENSG00000119121	9	77358745	144265	2	subGWAS_rs500102_TRPM6	6	3.702	chosen	1/6
PTAFR	0.631	subGWAS_rs533123	1	ENSG00000169403	1	29141155	620708	7	subGWAS_rs533123_PTAFR	20	12.62	chosen	1/20
CNNM3	0.242	subGWAS_rs55950364	1	ENSG00000168763	2	97521748	39766	17	subGWAS_rs55950364_CNNM3	20	4.84	chosen	1/20
BCAR1	0.239	subGWAS_rs55960814	1	ENSG00000050820	16	74581867	720084	14	subGWAS_rs55960814_BCAR1	18	4.302	chosen	1/18
IL1RAPL1	1	subGWAS_rs55986193	1	ENSG00000169306	X	29270166	664650	1	subGWAS_rs55986193_IL1RAPL1	5	5	chosen	1/5	IL1RAPL1	IL1RAPL1
HDAC10	0.216	subGWAS_rs5769765	1	ENSG00000100429	22	50271176	418658	13	subGWAS_rs5769765_HDAC10	20	4.32	chosen	1/20
FAS	0.316	subGWAS_rs58415414	1	ENSG00000026103	10	91424019	694466	8	subGWAS_rs58415414_FAS	18	5.688	chosen	1/18
SPTBN1	0.505	subGWAS_rs60674360	1	ENSG00000115306	2	54310736	372686	9	subGWAS_rs60674360_SPTBN1	10	5.05	chosen	1/10
PPP1R21	0.433	subGWAS_rs60710459	1	ENSG00000162869	2	48687857	20120	5	subGWAS_rs60710459_PPP1R21	9	3.897	chosen	1/9
GAS6	0.377	subGWAS_rs60890541	1	ENSG00000183087	13	114916023	348977	10	subGWAS_rs60890541_GAS6	14	5.278	chosen	1/14
HMGA2	0.735	subGWAS_rs61921611	1	ENSG00000149948	12	66367726	149815	4	subGWAS_rs61921611_HMGA2	9	6.615	chosen	1/9
CDK5R1	0.47	subGWAS_rs62065467	1	ENSG00000176749	17	30760318	53319	10	subGWAS_rs62065467_CDK5R1	13	6.11	chosen	1/13	CDK5R1	CDK5R1
ITGA6	0.612	subGWAS_rs62184961	1	ENSG00000091409	2	172975569	316513	11	subGWAS_rs62184961_ITGA6	13	7.956	chosen	1/13
MGAT5	0.466	subGWAS_rs6430491	1	ENSG00000152127	2	134840967	36587	2	subGWAS_rs6430491_MGAT5	7	3.262	chosen	1/7
ERBB4	0.814	subGWAS_rs6435711	1	ENSG00000178568	2	213410065	6500	1	subGWAS_rs6435711_ERBB4	3	2.442	chosen	1/3
KCNJ2	0.857	subGWAS_rs6501418	1	ENSG00000123700	17	68895776	730962	2	subGWAS_rs6501418_KCNJ2	2	1.714	chosen	1/2
TTPA	0.846	subGWAS_rs67801322	1	ENSG00000137561	8	64649452	650840	2	subGWAS_rs67801322_TTPA	4	3.384	chosen	1/4
RNF145	0.547	subGWAS_rs67867295	1	ENSG00000145860	5	158728264	91203	2	subGWAS_rs67867295_RNF145	8	4.376	chosen	1/8
RBPJ	0.83	subGWAS_rs6825268	1	ENSG00000168214	4	26783453	618376	3	subGWAS_rs6825268_RBPJ	6	4.98	chosen	1/6
PPIP5K2	0.294	subGWAS_rs6878284	1	ENSG00000145725	5	101769726	686127	5	subGWAS_rs6878284_PPIP5K2	6	1.764	chosen	1/6
TREM2	0.472	subGWAS_rs6917512	1	ENSG00000095970	6	40828285	302639	7	subGWAS_rs6917512_TREM2	18	8.496	chosen	1/18
C6orf118	1	subGWAS_rs6919939	1	ENSG00000112539	6	164975014	748082	1	subGWAS_rs6919939_C6orf118	1	1	chosen	1/1
MAGI2	0.629	subGWAS_rs6951046	1	ENSG00000187391	7	78372798	710092	3	subGWAS_rs6951046_MAGI2	3	1.887	chosen	1/3
TUSC3	0.652	subGWAS_rs7002619	1	ENSG00000104723	8	16065557	790833	2	subGWAS_rs7002619_TUSC3	6	3.912	chosen	1/6
CD14	0.899	subGWAS_rs70988775	1	ENSG00000170458	5	140155905	142619	14	subGWAS_rs70988775_CD14	20	17.98	chosen	1/20
CCNH	0.965	subGWAS_rs710369	1	ENSG00000134480	5	87095250	386414	2	subGWAS_rs710369_CCNH	3	2.895	chosen	1/3
RAB30	0.853	subGWAS_rs7122181	1	ENSG00000137502	11	81202910	1580055	4	subGWAS_rs7122181_RAB30	7	5.971	chosen	1/7
EAPP	0.329	subGWAS_rs7140760	1	ENSG00000129518	14	34253107	755809	4	subGWAS_rs7140760_EAPP	6	1.974	chosen	1/6
NFKBIA	0.413	subGWAS_rs7145883	1	ENSG00000100906	14	35528819	345136	11	subGWAS_rs7145883_NFKBIA	14	5.782	chosen	1/14
MAN2A1	0.758	subGWAS_rs71575306	1	ENSG00000112893	5	109046210	21143	3	subGWAS_rs71575306_MAN2A1	3	2.274	chosen	1/3
CEBPB	0.441	subGWAS_rs7267348	1	ENSG00000172216	20	48131036	676340	16	subGWAS_rs7267348_CEBPB	17	7.497	chosen	1/17
FCGR1A	0.318	subGWAS_rs72700829	1	ENSG00000150337	1	150540181	785954	2	subGWAS_rs72700829_FCGR1A	20	6.36	chosen	1/20
EGR2	0.873	subGWAS_rs72829007	1	ENSG00000122877	10	64087955	591705	7	subGWAS_rs72829007_EGR2	8	6.984	chosen	1/8
CEP290	0.981	subGWAS_rs7294484	1	ENSG00000198707	12	87702406	833587	4	subGWAS_rs7294484_CEP290	5	4.905	chosen	1/5
EEF2K	0.5	subGWAS_rs74643689	1	ENSG00000103319	16	21691577	526026	19	subGWAS_rs74643689_EEF2K	20	10	chosen	1/20	EEF2K	EEF2K
FGF10	0.381	subGWAS_rs74724331	1	ENSG00000070193	5	44758161	368353	1	subGWAS_rs74724331_FGF10	3	1.143	chosen	1/3
ESRRA	0.526	subGWAS_rs74896026	1	ENSG00000173153	11	64684990	611946	19	subGWAS_rs74896026_ESRRA	20	10.52	chosen	1/20
ZRANB2	0.533	subGWAS_rs7531932	1	ENSG00000132485	1	72134585	587605	2	subGWAS_rs7531932_ZRANB2	3	1.599	chosen	1/3
PLCL2	0.545	subGWAS_rs75342952	1	ENSG00000154822	3	17386077	541918	3	subGWAS_rs75342952_PLCL2	3	1.635	chosen	1/3
REL	0.399	subGWAS_rs7599488	1	ENSG00000162924	2	60718347	390309	3	subGWAS_rs7599488_REL	9	3.591	chosen	1/9
SATB1	0.785	subGWAS_rs7617937	1	ENSG00000182568	3	18887985	400905	2	subGWAS_rs7617937_SATB1	3	2.355	chosen	1/3
CHMP3	0.437	subGWAS_rs76239019	1	ENSG00000115561	2	86947783	462	9	subGWAS_rs76239019_CHMP3	15	6.555	chosen	1/15
PACSIN2	0.357	subGWAS_rs76365544	1	ENSG00000100266	22	44146279	735128	2	subGWAS_rs76365544_PACSIN2	20	7.14	chosen	1/20
EFNA5	0.933	subGWAS_rs7708343	1	ENSG00000184349	5	107205182	198586	1	subGWAS_rs7708343_EFNA5	3	2.799	chosen	1/3
HSPA8	0.988	subGWAS_rs77502336	1	ENSG00000109971	11	123394636	460698	5	subGWAS_rs77502336_HSPA8	20	19.76	chosen	1/20
VPS41	0.696	subGWAS_rs7786896	1	ENSG00000006715	7	39093928	121934	3	subGWAS_rs7786896_VPS41	7	4.872	chosen	1/7
NR4A2	0.532	subGWAS_rs77941179	1	ENSG00000153234	2	156843847	355013	1	subGWAS_rs77941179_NR4A2	2	1.064	chosen	1/2
XPO7	0.269	subGWAS_rs7814263	1	ENSG00000130227	8	22186618	409438	3	subGWAS_rs7814263_XPO7	20	5.38	chosen	1/20
FANCL	1	subGWAS_rs78226650	1	ENSG00000115392	2	59153054	684547	1	subGWAS_rs78226650_FANCL	1	1	chosen	1/1
DUSP26	0.857	subGWAS_rs78267637	1	ENSG00000133878	8	33790200	332576	5	subGWAS_rs78267637_DUSP26	5	4.285	chosen	1/5
NOL8	0.17	subGWAS_rs7875611	1	ENSG00000198000	9	95679009	591091	4	subGWAS_rs7875611_NOL8	20	3.4	chosen	1/20
SVIL	0.533	subGWAS_rs7899469	1	ENSG00000197321	10	30009830	15880	2	subGWAS_rs7899469_SVIL	6	3.198	chosen	1/6
ARAP1	0.353	subGWAS_rs7927908	1	ENSG00000186635	11	72201615	303029	16	subGWAS_rs7927908_ARAP1	20	7.06	chosen	1/20
MDGA2	0.903	subGWAS_rs8012618	1	ENSG00000139915	14	47542996	601161	2	subGWAS_rs8012618_MDGA2	2	1.806	chosen	1/2
SLC7A6	0.5	subGWAS_rs8049057	1	ENSG00000103064	16	69210661	912228	3	subGWAS_rs8049057_SLC7A6	20	10	chosen	1/20
RBFOX1	1	subGWAS_rs8054347	1	ENSG00000078328	16	6717757	648662	1	subGWAS_rs8054347_RBFOX1	1	1	chosen	1/1
CLTCL1	0.329	subGWAS_rs8137258	1	ENSG00000070371	22	20135961	856722	3	subGWAS_rs8137258_CLTCL1	20	6.58	chosen	1/20
LSAMP	1	subGWAS_rs817492	1	ENSG00000185565	3	117693473	22622	1	subGWAS_rs817492_LSAMP	1	1	chosen	1/1
RPL15	0.33	subGWAS_rs9310732	1	ENSG00000174748	3	24215557	257521	4	subGWAS_rs9310732_RPL15	6	1.98	chosen	1/6
CRYL1	0.349	subGWAS_rs9316337	1	ENSG00000165475	13	21962207	862211	1	subGWAS_rs9316337_CRYL1	12	4.188	chosen	1/12
RANBP2	0.928	subGWAS_rs9330316	1	ENSG00000153201	2	110284236	948299	1	subGWAS_rs9330316_RANBP2	10	9.28	chosen	1/10
TSC22D1	0.811	subGWAS_rs9595066	1	ENSG00000102804	13	44706268	445015	5	subGWAS_rs9595066_TSC22D1	8	6.488	chosen	1/8
FAM19A5	1	subGWAS_rs9615807	1	ENSG00000219438	22	48614954	270318	1	subGWAS_rs9615807_FAM19A5	1	1	chosen	1/1
MTAP	0.379	subGWAS_rs9695226	1	ENSG00000099810	9	22759396	956761	1	subGWAS_rs9695226_MTAP	4	1.516	chosen	1/4
STT3B	0.482	subGWAS_rs9810544	1	ENSG00000163527	3	31534464	39666	3	subGWAS_rs9810544_STT3B	8	3.856	chosen	1/8
TBL1XR1	0.977	subGWAS_rs9855893	1	ENSG00000177565	3	175167277	1747984	2	subGWAS_rs9855893_TBL1XR1	2	1.954	chosen	1/2
ARHGAP44	0.404	subGWAS_rs9907138	1	ENSG00000006740	17	12866090	173261	4	subGWAS_rs9907138_ARHGAP44	6	2.424	chosen	1/6	ARHGAP44	ARHGAP44

## Sheet: ST2 MPO
ST2 GSEA with MPO of allHRGs, sigHRGs and subHRGs
pathname	termid	allGWAS	allOR	allpopsize	sigGWAS	sigOR	sigpopsize	subGWAS	subOR	subpopsize	term	description
MP:0010768 (392)	MP:0010768	2.53e-21	4.06	4121	2.39e-08	4.02	4121	3.08e-12	4.16	4121	MP:0010768	mortality/aging
MP:0003631 (253)	MP:0003631	6.2e-21	4.77	2675	4.46e-12	5.85	2675	5.75e-09	4.22	2675	MP:0003631	nervous system phenotype
MP:0010769 (374)	MP:0010769	4.46e-20	3.97	3831	8.83e-08	3.91	3831	1.06e-11	4.14	3831	MP:0010769	abnormal survival
MP:0000001 (816)	MP:0000001	3.24e-19	3.55	8795	3.42e-10	4.3	8795	7.78e-09	3.2	8795	MP:0000001	mammalian phenotype
MP:0010770 (336)	MP:0010770	1.44e-18	3.92	3411	6.16e-07	3.78	3411	3.18e-11	4.24	3411	MP:0010770	preweaning lethality
MP:0003632 (195)	MP:0003632	8.52e-17	4.71	2104	1.34e-08	5.36	2104	5.59e-08	4.44	2104	MP:0003632	abnormal nervous system morphology
MP:0005621 (219)	MP:0005621	1.14e-16	4.41	2487	3.41e-07	4.52	2487	3.13e-09	4.66	2487	MP:0005621	abnormal cell physiology
MP:0003633 (134)	MP:0003633	5.63e-16	5.7	1504	1.58e-07	6.12	1504	1.03e-07	5.64	1504	MP:0003633	abnormal nervous system physiology
MP:0010832 (165)	MP:0010832	1.91e-15	4.89	1680	1.45e-06	5.05	1680	3.17e-09	5.51	1680	MP:0010832	lethality during fetal growth through weaning
MP:0002152 (117)	MP:0002152	3.05e-15	6.05	1268	3.86e-08	6.93	1268	5.8e-07	5.87	1268	MP:0002152	abnormal brain morphology
MP:0005384 (260)	MP:0005384	1.21e-13	3.64	2940	2.31e-05	3.65	2940	9.48e-08	3.85	2940	MP:0005384	cellular phenotype
MP:0002080 (179)	MP:0002080	5.39e-13	4.2	1909	0.000208	3.98	1909	2.82e-07	4.47	1909	MP:0002080	prenatal lethality
MP:0000428 (94)	MP:0000428	6.56e-13	6.28	891	3.49e-08	9.76	891	5.04e-05	5.31	891	MP:0000428	abnormal craniofacial morphology
MP:0005382 (94)	MP:0005382	6.56e-13	6.28	895	3.49e-08	9.76	895	5.04e-05	5.31	895	MP:0005382	craniofacial phenotype
MP:0005369 (97)	MP:0005369	3.49e-12	5.87	1052	3.27e-08	8.1	1052	0.00704	4.22	1052	MP:0005369	muscle phenotype
MP:0005385 (194)	MP:0005385	6.78e-12	3.84	2095	1.24e-08	5.51	2095	0.0154	2.8	2095	MP:0005385	cardiovascular system phenotype
MP:0001544 (120)	MP:0001544	1.25e-11	4.93	1275	3.25e-09	8.09	1275	0.0384	3.29	1275	MP:0001544	abnormal cardiovascular system physiology
MP:0002128 (44)	MP:0002128	2.87e-11	11.73	551	3.15e-07	14.21	551	0.0053	10.34	551	MP:0002128	abnormal blood circulation
MP:0002882 (92)	MP:0002882	4.75e-11	5.69	1125	0.000112	6.03	1125	5.15e-06	6.01	1125	MP:0002882	abnormal neuron morphology
MP:0005378 (295)	MP:0005378	5.35e-11	3.12	3347	3.48e-05	3.44	3347	1.82e-06	3.37	3347	MP:0005378	growth/size/body region phenotype
MP:0005376 (349)	MP:0005376	3.44e-10	2.86	3908	0.00225	2.77	3908	9.67e-06	3	3908	MP:0005376	homeostasis/metabolism phenotype
MP:0014134 (100)	MP:0014134	4.84e-10	5.05	1085	9e-05	5.29	1085	0.000613	4.99	1085	MP:0014134	abnormal embryo morphology
MP:0005380 (133)	MP:0005380	6.45e-10	4.22	1429	0.00181	3.94	1429	3.61e-05	4.67	1429	MP:0005380	embryo phenotype
MP:0002127 (147)	MP:0002127	1.71e-09	3.91	1579	1.3e-05	5.01	1579	0.0157	3.11	1579	MP:0002127	abnormal cardiovascular system morphology
MP:0005294 (55)	MP:0005294	2.58e-09	7.63	509	8.38e-05	10.36	509	0.0222	5.24	509	MP:0005294	abnormal heart ventricle morphology
MP:0002106 (64)	MP:0002106	2.63e-09	6.67	689	1.1e-06	10.94	689	0.399	3.89	689	MP:0002106	abnormal muscle physiology
MP:0001914 (36)	MP:0001914	2.74e-09	12.24	438	4.75e-06	15.6	438	0.159	9.15	438	MP:0001914	hemorrhage
MP:0000783 (72)	MP:0000783	7.25e-09	5.86	757	0.00101	5.9	757	0.000547	5.96	757	MP:0000783	abnormal forebrain morphology
MP:0003861 (96)	MP:0003861	9.31e-09	4.76	919	0.0733	4.01	919	3.01e-05	5.52	919	MP:0003861	abnormal nervous system development
MP:0004924 (249)	MP:0004924	1.08e-08	2.98	2761	0.000127	3.46	2761	0.00102	2.88	2761	MP:0004924	abnormal behavior
MP:0005386 (249)	MP:0005386	1.08e-08	2.98	2761	0.000127	3.46	2761	0.00102	2.88	2761	MP:0005386	behavior/neurological phenotype
MP:0000266 (112)	MP:0000266	1.89e-08	4.25	1133	0.000189	5.22	1133	0.0201	3.47	1133	MP:0000266	abnormal heart morphology
MP:0001764 (315)	MP:0001764	4.82e-08	2.68	3436	0.0774	2.44	3436	3.05e-05	2.99	3436	MP:0001764	abnormal homeostasis
MP:0004196 (76)	MP:0004196	5.95e-08	5.24	923	0.0294	4.69	923	8.55e-05	6.67	923	MP:0004196	abnormal prenatal growth/weight/body size
MP:0002206 (46)	MP:0002206	1.25e-07	7.67	510	0.00325	8.02	510	0.0037	8.12	510	MP:0002206	abnormal CNS synaptic transmission
MP:0003635 (55)	MP:0003635	1.31e-07	6.52	582	0.000793	8.66	582	0.0131	5.6	582	MP:0003635	abnormal synaptic transmission
MP:0008762 (137)	MP:0008762	1.67e-07	3.6	1467	0.0738	3.42	1467	0.000661	3.76	1467	MP:0008762	embryonic lethality
MP:0000787 (59)	MP:0000787	2.22e-07	6.03	591	0.049	5.05	591	0.000577	7.5	591	MP:0000787	abnormal telencephalon morphology
MP:0002085 (72)	MP:0002085	2.25e-07	5.2	782	0.000282	6.27	782	0.0928	4.4	782	MP:0002085	abnormal embryonic tissue morphology
MP:0008540 (44)	MP:0008540	2.34e-07	7.77	434	0.0241	6.71	434	0.0017	9.14	434	MP:0008540	abnormal cerebral hemisphere morphology
MP:0002092 (117)	MP:0002092	5.03e-07	3.78	1162	0.0143	3.81	1162	0.000931	4.12	1162	MP:0002092	abnormal eye morphology
MP:0005329 (37)	MP:0005329	6.95e-07	8.77	320	0.0487	9.29	320	0.0141	7.49	320	MP:0005329	abnormal myocardium layer morphology
MP:0005391 (122)	MP:0005391	7.5e-07	3.65	1262	0.00504	4.01	1262	0.00413	3.69	1262	MP:0005391	vision/eye phenotype
MP:0000350 (58)	MP:0000350	7.57e-07	5.81	671	0.313	4.58	671	0.000151	7.99	671	MP:0000350	abnormal cell proliferation
MP:0002925 (52)	MP:0002925	8.86e-07	6.3	600	0.0119	6.67	600	0.0146	6.63	600	MP:0002925	abnormal cardiovascular development
MP:0005388 (116)	MP:0005388	1.35e-06	3.68	1067	0.0141	3.96	1067	0.00339	4	1067	MP:0005388	respiratory system phenotype
MP:0002082 (90)	MP:0002082	1.41e-06	4.23	915	0.387	3.88	915	5.04e-05	5.31	915	MP:0002082	postnatal lethality
MP:0000438 (56)	MP:0000438	1.46e-06	5.81	559	4.34e-05	9.98	559	0.213	4.53	559	MP:0000438	abnormal cranium morphology
MP:0004811 (38)	MP:0004811	1.5e-06	8.18	452	0.361	6.17	452	0.000284	12.21	452	MP:0004811	abnormal neuron physiology
MP:0010545 (38)	MP:0010545	1.5e-06	8.18	326	0.0487	9.29	326	0.0141	7.49	326	MP:0010545	abnormal heart layer morphology
MP:0010866 (53)	MP:0010866	1.6e-06	6.05	704	0.0749	5.66	704	0.00108	7.66	704	MP:0010866	abnormal prenatal body size
MP:0003091 (33)	MP:0003091	2.27e-06	9.29	383	0.0487	9.29	383	0.0053	10.34	383	MP:0003091	abnormal cell migration
MP:0002116 (57)	MP:0002116	2.53e-06	5.6	570	4.34e-05	9.98	570	0.332	4.26	570	MP:0002116	abnormal craniofacial bone morphology
MP:0002063 (45)	MP:0002063	3.34e-06	6.7	564	0.000116	13.43	564	1	3.84	564	MP:0002063	abnormal learning/memory/conditioning
MP:0014114 (45)	MP:0014114	3.34e-06	6.7	565	0.000116	13.43	565	1	3.84	565	MP:0014114	abnormal cognition
MP:0002089 (202)	MP:0002089	3.44e-06	2.81	2439	0.00236	3.35	2439	0.00489	2.91	2439	MP:0002089	abnormal postnatal growth/weight/body size
MP:0002108 (71)	MP:0002108	3.56e-06	4.73	700	0.00068	6.61	700	0.453	3.62	700	MP:0002108	abnormal muscle morphology
MP:0001265 (150)	MP:0001265	8.5e-06	3.09	1863	0.00506	3.76	1863	0.00351	3.3	1863	MP:0001265	decreased body size
MP:0002083 (73)	MP:0002083	8.67e-06	4.49	863	0.948	4.2	863	0.00367	4.69	863	MP:0002083	premature death
MP:0006208 (35)	MP:0006208	1.07e-05	7.95	338	0.00306	9.26	338	1	6.73	338	MP:0006208	lethality throughout fetal growth and development
MP:0002081 (96)	MP:0002081	1.38e-05	3.77	946	0.0268	4.05	946	0.0253	4.09	946	MP:0002081	perinatal lethality
MP:0003492 (57)	MP:0003492	1.39e-05	5.2	778	0.313	4.58	778	0.000306	7.37	778	MP:0003492	abnormal involuntary movement
MP:0003935 (30)	MP:0003935	1.64e-05	9.11	288	3.82e-06	37.22	288	1	5.02	288	MP:0003935	abnormal craniofacial development
MP:0005397 (237)	MP:0005397	2.07e-05	2.54	2783	0.0231	2.81	2783	0.0196	2.58	2783	MP:0005397	hematopoietic system phenotype
MP:0001634 (25)	MP:0001634	2.1e-05	11.15	245	0.000976	13.61	245	1	8.3	245	MP:0001634	internal hemorrhage
MP:0010630 (25)	MP:0010630	2.1e-05	11.15	236	0.564	16.28	236	0.0482	8.07	236	MP:0010630	abnormal cardiac muscle tissue morphology
MP:0000913 (58)	MP:0000913	2.29e-05	5.02	571	1	3.82	571	0.00113	6.92	571	MP:0000913	abnormal brain development
MP:0003956 (175)	MP:0003956	2.29e-05	2.82	2157	0.00306	3.51	2157	0.0239	2.85	2157	MP:0003956	abnormal body size
MP:0001614 (90)	MP:0001614	2.36e-05	3.82	928	0.00451	5.08	928	0.534	3.11	928	MP:0001614	abnormal blood vessel morphology
MP:0000432 (65)	MP:0000432	2.53e-05	4.63	690	0.0119	6.67	690	0.0256	4.52	690	MP:0000432	abnormal head morphology
MP:0000281 (28)	MP:0000281	2.93e-05	9.46	239	0.00253	11.33	239	1	4.99	239	MP:0000281	abnormal interventricular septum morphology
MP:0002066 (168)	MP:0002066	3.41e-05	2.83	1915	0.00599	3.43	1915	0.0737	2.74	1915	MP:0002066	abnormal motor capabilities/coordination/movement
MP:0002189 (14)	MP:0002189	4.42e-05	31.02	121	0.9	26.95	121	0.0444	35.3	121	MP:0002189	abnormal myocardial trabeculae morphology
MP:0000801 (26)	MP:0000801	5.16e-05	9.9	248	0.799	7.32	248	0.0151	12.79	248	MP:0000801	abnormal temporal lobe morphology
MP:0000807 (26)	MP:0000807	5.16e-05	9.9	242	0.799	7.32	242	0.0151	12.79	242	MP:0000807	abnormal hippocampus morphology
MP:0005387 (228)	MP:0005387	5.49e-05	2.51	2731	0.0712	2.73	2731	0.0272	2.57	2731	MP:0005387	immune system phenotype
MP:0011091 (21)	MP:0011091	5.73e-05	13.04	274	0.0678	14.68	274	0.11	13.5	274	MP:0011091	prenatal lethality, complete penetrance
MP:0002723 (71)	MP:0002723	7.31e-05	4.19	866	1	3.65	866	0.00847	4.81	866	MP:0002723	abnormal immune serum protein physiology
MP:0005390 (180)	MP:0005390	7.49e-05	2.69	1819	0.000293	3.9	1819	0.886	2.31	1819	MP:0005390	skeleton phenotype
MP:0004166 (27)	MP:0004166	0.000118	8.91	284	1	6.27	284	0.0151	12.79	284	MP:0004166	abnormal limbic system morphology
MP:0006113 (30)	MP:0006113	0.000139	7.88	277	0.00253	11.33	277	1	3.74	277	MP:0006113	abnormal heart septum morphology
MP:0009931 (30)	MP:0009931	0.000139	7.88	358	1	6.5	358	0.00303	9.65	358	MP:0009931	abnormal skin appearance
MP:0000259 (39)	MP:0000259	0.00015	6.17	402	1	5.04	402	0.022	9.42	402	MP:0000259	abnormal vascular development
MP:0002429 (77)	MP:0002429	0.000182	3.84	805	0.387	3.88	805	0.0208	4.38	805	MP:0002429	abnormal blood cell morphology/development
MP:0001784 (49)	MP:0001784	0.000188	5.11	558	0.0213	6.15	558	1	5.09	558	MP:0001784	abnormal fluid regulation
MP:0003491 (116)	MP:0003491	0.000193	3.12	1307	0.000224	4.93	1307	1	2.37	1307	MP:0003491	abnormal voluntary movement
MP:0001845 (81)	MP:0001845	0.000203	3.72	956	1	3.28	956	0.0168	4.26	956	MP:0001845	abnormal inflammatory response
MP:0001516 (46)	MP:0001516	0.000217	5.31	633	0.00135	10.59	633	1	3.29	633	MP:0001516	abnormal motor coordination/balance
MP:0006207 (63)	MP:0006207	0.000219	4.29	711	1	3.72	711	0.0368	4.93	711	MP:0006207	embryonic lethality during organogenesis
MP:0013693 (63)	MP:0013693	0.000219	4.29	687	0.478	4.31	687	0.0592	4.65	687	MP:0013693	abnormal hemopoiesis
MP:0005508 (176)	MP:0005508	0.000222	2.63	1726	0.000823	3.74	1726	1	2.23	1726	MP:0005508	abnormal skeleton morphology
MP:0010771 (121)	MP:0010771	0.00025	3.04	1438	0.356	3.14	1438	0.0384	3.29	1438	MP:0010771	integument phenotype
MP:0002873 (142)	MP:0002873	0.00026	2.84	1668	1	1.97	1668	0.000114	4.1	1668	MP:0002873	normal phenotype
MP:0012321 (142)	MP:0012321	0.00026	2.84	1605	0.0494	3.33	1605	0.152	2.8	1605	MP:0012321	abnormal total tissue mass
MP:0001392 (105)	MP:0001392	0.000263	3.23	1216	0.000246	5.35	1216	1	2.41	1216	MP:0001392	abnormal locomotor behavior
MP:0002396 (213)	MP:0002396	0.000274	2.45	2419	0.0118	3.03	2419	0.294	2.34	2419	MP:0002396	abnormal hematopoietic system morphology/development
MP:0001790 (151)	MP:0001790	0.000291	2.76	1833	0.916	2.63	1833	0.0159	3.18	1833	MP:0001790	abnormal immune system physiology
MP:0002133 (75)	MP:0002133	0.000342	3.8	680	0.387	3.88	680	0.0489	4.46	680	MP:0002133	abnormal respiratory system physiology
MP:0010402 (23)	MP:0010402	0.000373	9.77	173	0.0386	12.47	173	1	7.5	173	MP:0010402	ventricular septal defect
MP:0002086 (54)	MP:0002086	0.00041	4.59	546	1	3.82	546	0.0812	5.19	546	MP:0002086	abnormal extraembryonic tissue morphology
MP:0004197 (18)	MP:0004197	0.000413	13.48	225	0.0213	22.04	225	0.809	15.03	225	MP:0004197	abnormal fetal growth/weight/body size
MP:0005076 (44)	MP:0005076	0.000415	5.29	480	0.0489	6.77	480	0.564	5.11	480	MP:0005076	abnormal cell differentiation
MP:0005406 (58)	MP:0005406	0.000516	4.34	547	0.00883	5.78	547	1	2.65	547	MP:0005406	abnormal heart size
MP:0001785 (29)	MP:0001785	0.000527	7.42	356	0.0212	11.16	356	1	7.04	356	MP:0001785	edema
MP:0002169 (141)	MP:0002169	0.00058	2.77	1665	1	1.97	1665	0.00032	3.94	1665	MP:0002169	no abnormal phenotype detected
MP:0000313 (88)	MP:0000313	0.000599	3.41	1063	1	3.02	1063	0.0121	3.87	1063	MP:0000313	abnormal cell death
MP:0002088 (62)	MP:0002088	0.000625	4.12	765	1	3.2	765	0.0222	5.24	765	MP:0002088	abnormal embryonic growth/weight/body size
MP:0011099 (21)	MP:0011099	0.000652	10.39	194	0.799	7.32	194	0.236	30.04	194	MP:0011099	lethality throughout fetal growth and development, complete penetrance
MP:0011098 (45)	MP:0011098	0.000688	5.06	560	1	4.12	560	0.091	5.6	560	MP:0011098	embryonic lethality during organogenesis, complete penetrance
MP:0002067 (59)	MP:0002067	0.000786	4.2	785	0.313	4.58	785	0.0368	4.93	785	MP:0002067	abnormal sensory capabilities/reflexes/nociception
MP:0013657 (134)	MP:0013657	0.000842	2.79	1469	0.432	2.98	1469	0.0924	2.98	1469	MP:0013657	abnormal blood cell morphology
MP:0002207 (14)	MP:0002207	0.000933	18.89	174	0.322	12.75	174	0.236	Inf	174	MP:0002207	abnormal long term potentiation
MP:0005312 (14)	MP:0005312	0.000933	18.89	91	0.564	16.28	91	1	24.91	91	MP:0005312	pericardial effusion
MP:0006042 (49)	MP:0006042	0.000941	4.69	550	1	4.25	550	0.025	5.59	550	MP:0006042	increased apoptosis
MP:0012556 (49)	MP:0012556	0.000941	4.69	555	1	4.25	555	0.025	5.59	555	MP:0012556	increased cell death
MP:0000841 (30)	MP:0000841	0.00103	6.84	366	1	6.36	366	0.0482	8.07	366	MP:0000841	abnormal hindbrain morphology
MP:0003232 (19)	MP:0003232	0.00111	11.22	158	1	6.73	158	0.0351	20.26	158	MP:0003232	abnormal forebrain development
MP:0003743 (53)	MP:0003743	0.00121	4.39	548	0.0984	6.85	548	0.503	4.02	548	MP:0003743	abnormal facial morphology
MP:0010499 (12)	MP:0010499	0.00123	25.69	89	1	Inf	89	0.489	11.75	89	MP:0010499	abnormal ventricle myocardium morphology
MP:0005451 (162)	MP:0005451	0.00133	2.55	1811	0.286	2.8	1811	0.136	2.71	1811	MP:0005451	abnormal body composition
MP:0001648 (83)	MP:0001648	0.00145	3.38	934	1	3.03	934	0.0227	3.8	934	MP:0001648	abnormal apoptosis
MP:0003313 (87)	MP:0003313	0.0015	3.3	931	0.000824	5.65	931	1	2.25	931	MP:0003313	abnormal locomotor activation
MP:0001262 (124)	MP:0001262	0.00165	2.8	1431	0.47	3.05	1431	0.094	3.05	1431	MP:0001262	decreased body weight
MP:0012322 (124)	MP:0012322	0.00165	2.8	1431	0.47	3.05	1431	0.094	3.05	1431	MP:0012322	decreased total tissue mass
MP:0004087 (37)	MP:0004087	0.0017	5.54	288	0.398	7.11	288	1	4.23	288	MP:0004087	abnormal muscle fiber morphology
MP:0001259 (150)	MP:0001259	0.00172	2.6	1716	0.194	2.96	1716	0.317	2.64	1716	MP:0001259	abnormal body weight
MP:0002123 (61)	MP:0002123	0.00174	3.96	658	0.478	4.31	658	0.503	4.02	658	MP:0002123	abnormal definitive hematopoiesis
MP:0000267 (25)	MP:0000267	0.00181	7.81	274	0.768	9.56	274	1	6.73	274	MP:0000267	abnormal heart development
MP:0000819 (17)	MP:0000819	0.00186	12.4	103	1	10.85	103	0.171	17.62	103	MP:0000819	abnormal olfactory bulb morphology
MP:0009944 (17)	MP:0009944	0.00186	12.4	113	1	10.85	113	0.171	17.62	113	MP:0009944	abnormal olfactory lobe morphology
MP:0005370 (92)	MP:0005370	0.00207	3.16	987	0.551	3.36	987	1	3.05	987	MP:0005370	liver/biliary system phenotype
MP:0000288 (20)	MP:0000288	0.0027	9.62	181	1	7.64	181	1	10.01	181	MP:0000288	abnormal pericardium morphology
MP:0013656 (188)	MP:0013656	0.0027	2.37	2125	0.123	2.81	2125	0.659	2.33	2125	MP:0013656	abnormal hematopoietic cell morphology
MP:0005381 (93)	MP:0005381	0.00277	3.11	993	0.769	3.37	993	0.207	3.45	993	MP:0005381	digestive/alimentary phenotype
MP:0002114 (114)	MP:0002114	0.00317	2.83	1084	0.02	3.84	1084	1	2.41	1084	MP:0002114	abnormal axial skeleton morphology
MP:0002058 (74)	MP:0002058	0.00334	3.45	680	1	2.78	680	0.0116	5.27	680	MP:0002058	neonatal lethality
MP:0000847 (29)	MP:0000847	0.00367	6.42	327	1	5.41	327	0.0482	8.07	327	MP:0000847	abnormal metencephalon morphology
MP:0002652 (13)	MP:0002652	0.00453	17.12	71	1	13.47	71	1	12.45	71	MP:0002652	thin myocardium
MP:0002884 (13)	MP:0002884	0.00453	17.12	117	0.00413	Inf	117	1	4.93	117	MP:0002884	abnormal pharyngeal arch morphology
MP:0004198 (13)	MP:0004198	0.00453	17.12	177	0.163	32.56	177	1	24.91	177	MP:0004198	abnormal fetal size
MP:0001340 (18)	MP:0001340	0.00473	10.33	176	1	10.85	176	0.11	13.5	176	MP:0001340	abnormal eyelid morphology
MP:0001463 (18)	MP:0001463	0.00473	10.33	193	0.0213	22.04	193	1	3.96	193	MP:0001463	abnormal spatial learning
MP:0000516 (79)	MP:0000516	0.00478	3.28	703	1	2.89	703	0.0375	3.93	703	MP:0000516	abnormal renal/urinary system morphology
MP:0001961 (46)	MP:0001961	0.00532	4.42	636	0.812	4.72	636	0.296	5.14	636	MP:0001961	abnormal reflex
MP:0000458 (11)	MP:0000458	0.00628	23.05	135	1	Inf	135	1	12.45	135	MP:0000458	abnormal mandible morphology
MP:0000462 (76)	MP:0000462	0.00635	3.3	762	1	3.47	762	0.168	3.87	762	MP:0000462	abnormal digestive system morphology
MP:0000274 (43)	MP:0000274	0.00647	4.57	424	0.0881	6.14	424	1	2.5	424	MP:0000274	enlarged heart
MP:0002065 (30)	MP:0002065	0.00669	5.96	311	0.0933	9.97	311	1	3.35	311	MP:0002065	abnormal fear/anxiety-related behavior
MP:0000788 (24)	MP:0000788	0.00676	7.26	234	1	6.27	234	0.489	11.75	234	MP:0000788	abnormal cerebral cortex morphology
MP:0002060 (61)	MP:0002060	0.00685	3.68	683	1	3.95	683	0.213	3.97	683	MP:0002060	abnormal skin morphology
MP:0000849 (27)	MP:0000849	0.00694	6.5	300	1	5.41	300	0.0879	8.51	300	MP:0000849	abnormal cerebellum morphology
MP:0002557 (27)	MP:0002557	0.00694	6.5	294	1	7.64	294	0.661	6.53	294	MP:0002557	abnormal social/conspecific interaction
MP:0020135 (9)	MP:0020135	0.0074	40.87	122	1	21.4	122	1	Inf	122	MP:0020135	abnormal heart ventricle wall thickness
MP:0002151 (40)	MP:0002151	0.00774	4.74	436	0.625	5.55	436	1	4.14	436	MP:0002151	abnormal neural tube morphology
MP:0002132 (69)	MP:0002132	0.008	3.42	679	0.0181	5.74	679	1	2.76	679	MP:0002132	abnormal respiratory system morphology
MP:0002138 (81)	MP:0002138	0.00879	3.14	875	0.552	3.7	875	1	2.75	875	MP:0002138	abnormal hepatobiliary system morphology
MP:0009642 (243)	MP:0009642	0.0106	2.1	2552	1	1.71	2552	0.0177	2.57	2552	MP:0009642	abnormal blood homeostasis
MP:0005140 (19)	MP:0005140	0.011	8.85	139	0.163	32.56	139	1	4.28	139	MP:0005140	decreased cardiac muscle contractility
MP:0001846 (70)	MP:0001846	0.0111	3.34	789	1	3.04	789	0.244	3.7	789	MP:0001846	increased inflammatory response
MP:0002420 (90)	MP:0002420	0.0115	2.96	1182	1	2.47	1182	0.0704	3.86	1182	MP:0002420	abnormal adaptive immunity
MP:0011086 (48)	MP:0011086	0.0124	4.09	554	1	2.9	554	0.091	5.6	554	MP:0011086	postnatal lethality, incomplete penetrance
MP:0000738 (22)	MP:0000738	0.0126	7.47	198	0.322	12.75	198	1	4.28	198	MP:0000738	impaired muscle contractility
MP:0001545 (103)	MP:0001545	0.0135	2.77	1285	1	2.03	1285	0.0156	3.93	1285	MP:0001545	abnormal hematopoietic system physiology
MP:0001731 (71)	MP:0001731	0.0152	3.26	717	0.711	4.06	717	0.897	3.32	717	MP:0001731	abnormal postnatal growth
MP:0001698 (35)	MP:0001698	0.0174	4.93	478	1	3.97	478	0.661	6.53	478	MP:0001698	decreased embryo size
MP:0011085 (35)	MP:0011085	0.0174	4.93	382	1	8.13	382	0.155	5.16	382	MP:0011085	postnatal lethality, complete penetrance
MP:0001697 (42)	MP:0001697	0.0191	4.33	575	1	3.64	575	0.564	5.11	575	MP:0001697	abnormal embryo size
MP:0002752 (68)	MP:0002752	0.02	3.28	731	1	3.94	731	1	3.07	731	MP:0002752	abnormal somatic nervous system morphology
MP:0004200 (12)	MP:0004200	0.0215	15.36	170	0.9	26.95	170	1	24.91	170	MP:0004200	decreased fetal size
MP:0002020 (39)	MP:0002020	0.0232	4.48	401	0.0513	7.71	401	1	2.69	401	MP:0002020	increased tumor incidence
MP:0002572 (46)	MP:0002572	0.0232	4.03	536	0.102	7.96	536	1	2.53	536	MP:0002572	abnormal emotion/affect behavior
MP:0002062 (20)	MP:0002062	0.0234	7.74	242	0.396	8.79	242	1	6.22	242	MP:0002062	abnormal associative learning
MP:0000352 (23)	MP:0000352	0.0246	6.72	337	1	5.41	337	0.282	10.12	337	MP:0000352	decreased cell proliferation
MP:0002498 (23)	MP:0002498	0.0246	6.72	275	1	6.73	275	0.339	7.62	275	MP:0002498	abnormal acute inflammation
MP:0002972 (23)	MP:0002972	0.0246	6.72	179	0.322	12.75	179	1	3.74	179	MP:0002972	abnormal cardiac muscle contractility
MP:0009937 (23)	MP:0009937	0.0246	6.72	222	1	6.5	222	1	8.8	222	MP:0009937	abnormal neuron differentiation
MP:0002421 (89)	MP:0002421	0.0265	2.85	1163	1	2.47	1163	0.189	3.63	1163	MP:0002421	abnormal cell-mediated immunity
MP:0001732 (69)	MP:0001732	0.0274	3.2	696	1	3.72	696	0.642	3.46	696	MP:0001732	postnatal growth retardation
MP:0001672 (73)	MP:0001672	0.0279	3.11	830	1	2.78	830	0.582	3.7	830	MP:0001672	abnormal embryo development
MP:0005274 (36)	MP:0005274	0.0279	4.66	400	0.396	8.79	400	1	3.9	400	MP:0005274	abnormal viscerocranium morphology
MP:0001473 (10)	MP:0001473	0.0317	20.42	109	1	10.7	109	0.236	Inf	109	MP:0001473	reduced long term potentiation
MP:0000249 (33)	MP:0000249	0.033	4.9	313	1	6.5	313	1	4.23	313	MP:0000249	abnormal blood vessel physiology
MP:0020174 (33)	MP:0020174	0.033	4.9	327	1	5.48	327	1	5.07	327	MP:0020174	abnormal IgG level
MP:0002166 (47)	MP:0002166	0.0342	3.88	475	0.509	5.12	475	1	3.02	475	MP:0002166	altered tumor susceptibility
MP:0004056 (6)	MP:0004056	0.0358	Inf	50	1	Inf	50	1	Inf	50	MP:0004056	abnormal myocardium compact layer morphology
MP:0000221 (82)	MP:0000221	0.0365	2.91	954	0.757	3.77	954	1	2.57	954	MP:0000221	decreased leukocyte cell number
MP:0002135 (70)	MP:0002135	0.0368	3.13	661	1	2.58	661	0.131	3.78	661	MP:0002135	abnormal kidney morphology
MP:0001399 (30)	MP:0001399	0.038	5.19	392	0.799	7.32	392	1	5.07	392	MP:0001399	hyperactivity
MP:0005620 (30)	MP:0005620	0.038	5.19	269	0.0933	9.97	269	1	2.71	269	MP:0005620	abnormal muscle contractility
MP:0002295 (8)	MP:0002295	0.0403	35.65	60	0.9	26.95	60	1	Inf	60	MP:0002295	abnormal pulmonary circulation
MP:0002915 (8)	MP:0002915	0.0403	35.65	90	1	21.4	90	1	Inf	90	MP:0002915	abnormal synaptic depression
MP:0004067 (8)	MP:0004067	0.0403	35.65	68	1	Inf	68	1	24.91	68	MP:0004067	abnormal trabecula carnea morphology
MP:0010500 (8)	MP:0010500	0.0403	35.65	68	1	Inf	68	1	14.79	68	MP:0010500	myocardium hypoplasia
MP:0000260 (27)	MP:0000260	0.0427	5.58	284	1	4.22	284	0.489	11.75	284	MP:0000260	abnormal angiogenesis
MP:0011109 (18)	MP:0011109	0.043	8.08	176	0.00398	24.99	176	1	1.96	176	MP:0011109	lethality throughout fetal growth and development, incomplete penetrance
MP:0002490 (37)	MP:0002490	0.0439	4.43	416	1	3.97	416	1	5.09	416	MP:0002490	abnormal immunoglobulin level
MP:0000685 (171)	MP:0000685	0.0454	2.2	1956	0.0854	2.95	1956	1	1.95	1956	MP:0000685	abnormal immune system morphology
MP:0001711 (24)	MP:0001711	0.0458	6.11	287	1	3.83	287	0.282	10.12	287	MP:0001711	abnormal placenta morphology
MP:0002442 (87)	MP:0002442	0.046	2.8	1129	1	2.47	1129	0.349	3.55	1129	MP:0002442	abnormal leukocyte physiology
MP:0003921 (21)	MP:0003921	0.0463	6.87	216	1	8.98	216	1	5.02	216	MP:0003921	abnormal heart left ventricle morphology
MP:0000598 (75)	MP:0000598	0.0494	2.98	802	1	3.18	802	1	2.86	802	MP:0000598	abnormal liver morphology
/fs0/chenr6/Database_fs0/MGI/processing/term.gene/MP:0012382 (96)	MP:0012382	0.0539	2.67	1227	1	2.26	1227	0.286	3.33	1227	MP:0012382	abnormal blood cell physiology
/fs0/chenr6/Database_fs0/MGI/processing/term.gene/MP:0001800 (41)	MP:0001800	0.0544	4.08	448	1	3.35	448	0.564	5.11	448	MP:0001800	abnormal humoral immune response
/fs0/chenr6/Database_fs0/MGI/processing/term.gene/MP:0010865 (41)	MP:0010865	0.0544	4.08	500	1	4.5	500	1	3.79	500	MP:0010865	prenatal growth retardation
/fs0/chenr6/Database_fs0/MGI/processing/term.gene/MP:0005195 (52)	MP:0005195	0.0554	3.55	627	1	3.59	627	1	4.1	627	MP:0005195	abnormal posterior eye segment morphology
/fs0/chenr6/Database_fs0/MGI/processing/term.gene/MP:0001819 (88)	MP:0001819	0.0594	2.75	1151	1	2.47	1151	0.492	3.41	1151	MP:0001819	abnormal immune cell physiology
/fs0/chenr6/Database_fs0/MGI/processing/term.gene/MP:0004097 (13)	MP:0004097	0.0595	11.52	229	1	5.28	229	0.0351	20.26	229	MP:0004097	abnormal cerebellar cortex morphology
/fs0/chenr6/Database_fs0/MGI/processing/term.gene/MP:0011087 (56)	MP:0011087	0.0597	3.4	460	1	2.58	460	0.0477	5.6	460	MP:0011087	neonatal lethality, complete penetrance
/fs0/chenr6/Database_fs0/MGI/processing/term.gene/MP:0000454 (31)	MP:0000454	0.0628	4.86	348	0.396	8.79	348	1	4.03	348	MP:0000454	abnormal jaw morphology
/fs0/chenr6/Database_fs0/MGI/processing/term.gene/MP:0002019 (45)	MP:0002019	0.0637	3.82	465	0.308	5.59	465	1	2.67	465	MP:0002019	abnormal tumor incidence
/fs0/chenr6/Database_fs0/MGI/processing/term.gene/MP:0010678 (64)	MP:0010678	0.0649	3.16	755	1	2.61	755	0.399	3.89	755	MP:0010678	abnormal skin adnexa morphology
/fs0/chenr6/Database_fs0/MGI/processing/term.gene/MP:0000367 (38)	MP:0000367	0.0676	4.21	460	1	3.45	460	0.564	5.11	460	MP:0000367	abnormal coat/ hair morphology
/fs0/chenr6/Database_fs0/MGI/processing/term.gene/MP:0004738 (28)	MP:0004738	0.0726	5.18	338	1	4.63	338	1	4.48	338	MP:0004738	abnormal auditory brainstem response
/fs0/chenr6/Database_fs0/MGI/processing/term.gene/MP:0006335 (28)	MP:0006335	0.0726	5.18	353	1	4.63	353	1	4.48	353	MP:0006335	abnormal hearing electrophysiology
/fs0/chenr6/Database_fs0/MGI/processing/term.gene/MP:0005367 (89)	MP:0005367	0.0761	2.7	928	1	2.15	928	0.157	3.41	928	MP:0005367	renal/urinary system phenotype
/fs0/chenr6/Database_fs0/MGI/processing/term.gene/MP:0005016 (57)	MP:0005016	0.0826	3.3	732	0.711	4.06	732	1	2.97	732	MP:0005016	decreased lymphocyte cell number
/fs0/chenr6/Database_fs0/MGI/processing/term.gene/MP:0002191 (35)	MP:0002191	0.083	4.38	332	0.0933	9.97	332	1	2.5	332	MP:0002191	abnormal artery morphology
/fs0/chenr6/Database_fs0/MGI/processing/term.gene/MP:0002419 (35)	MP:0002419	0.083	4.38	510	1	4.22	510	1	4.62	510	MP:0002419	abnormal innate immunity
/fs0/chenr6/Database_fs0/MGI/processing/term.gene/MP:0000217 (116)	MP:0000217	0.0981	2.41	1353	0.532	3.23	1353	1	2.04	1353	MP:0000217	abnormal leukocyte cell number
/fs0/chenr6/Database_fs0/MGI/processing/term.gene/MP:0002006 (54)	MP:0002006	0.108	3.33	543	0.948	4.2	543	1	2.66	543	MP:0002006	neoplasm
/fs0/chenr6/Database_fs0/MGI/processing/term.gene/MP:0002452 (62)	MP:0002452	0.116	3.1	785	1	3.03	785	1	3.22	785	MP:0002452	abnormal professional antigen presenting cell physiology
/fs0/chenr6/Database_fs0/MGI/processing/term.gene/MP:0008246 (131)	MP:0008246	0.134	2.28	1533	0.251	3.14	1533	1	1.94	1533	MP:0008246	abnormal leukocyte morphology
/fs0/chenr6/Database_fs0/MGI/processing/term.gene/MP:0001405 (26)	MP:0001405	0.138	5.16	346	1	5.38	346	1	4.48	346	MP:0001405	impaired coordination
/fs0/chenr6/Database_fs0/MGI/processing/term.gene/MP:0020148 (26)	MP:0020148	0.138	5.16	359	0.322	12.75	359	1	2.99	359	MP:0020148	abnormal sensitivity to induced morbidity/mortality
/fs0/chenr6/Database_fs0/MGI/processing/term.gene/MP:0001943 (51)	MP:0001943	0.142	3.37	451	1	2.7	451	0.213	4.53	451	MP:0001943	abnormal respiration
/fs0/chenr6/Database_fs0/MGI/processing/term.gene/MP:0001386 (9)	MP:0001386	0.155	17.8	96	1	7.97	96	1	Inf	96	MP:0001386	abnormal maternal nurturing
/fs0/chenr6/Database_fs0/MGI/processing/term.gene/MP:0001533 (33)	MP:0001533	0.157	4.32	519	1	3.8	519	1	5.7	519	MP:0001533	abnormal skeleton physiology
/fs0/chenr6/Database_fs0/MGI/processing/term.gene/MP:0001657 (33)	MP:0001657	0.157	4.32	473	1	6.36	473	1	3.09	473	MP:0001657	abnormal induced morbidity/mortality
/fs0/chenr6/Database_fs0/MGI/processing/term.gene/MP:0002327 (33)	MP:0002327	0.157	4.32	302	1	1.98	302	0.0275	6.73	302	MP:0002327	abnormal respiratory function
/fs0/chenr6/Database_fs0/MGI/processing/term.gene/MP:0005253 (33)	MP:0005253	0.157	4.32	389	1	5.51	389	1	3.9	389	MP:0005253	abnormal eye physiology
/fs0/chenr6/Database_fs0/MGI/processing/term.gene/MP:0010274 (33)	MP:0010274	0.157	4.32	322	0.201	8.3	322	1	2.48	322	MP:0010274	increased organ/body region tumor incidence
/fs0/chenr6/Database_fs0/MGI/processing/term.gene/MP:0013152 (33)	MP:0013152	0.157	4.32	326	0.201	8.3	326	1	2.48	326	MP:0013152	abnormal organ/body region tumor incidence
/fs0/chenr6/Database_fs0/MGI/processing/term.gene/MP:0000716 (132)	MP:0000716	0.162	2.25	1549	0.251	3.14	1549	1	1.9	1549	MP:0000716	abnormal immune system cell morphology
/fs0/chenr6/Database_fs0/MGI/processing/term.gene/MP:0004264 (20)	MP:0004264	0.165	6.28	258	1	2.11	258	0.0664	11.44	258	MP:0004264	abnormal extraembryonic tissue physiology
/fs0/chenr6/Database_fs0/MGI/processing/term.gene/MP:0020180 (20)	MP:0020180	0.165	6.28	177	1	8.13	177	1	4.97	177	MP:0020180	abnormal IgM level
/fs0/chenr6/Database_fs0/MGI/processing/term.gene/MP:0008872 (44)	MP:0008872	0.17	3.61	499	1	5.51	499	1	2.83	499	MP:0008872	abnormal physiological response to xenobiotic
/fs0/chenr6/Database_fs0/MGI/processing/term.gene/MP:0001510 (37)	MP:0001510	0.191	3.95	438	1	2.93	438	1	5.09	438	MP:0001510	abnormal coat appearance
/fs0/chenr6/Database_fs0/MGI/processing/term.gene/MP:0001963 (30)	MP:0001963	0.191	4.52	403	1	4.05	403	1	4.03	403	MP:0001963	abnormal hearing physiology
/fs0/chenr6/Database_fs0/MGI/processing/term.gene/MP:0010502 (7)	MP:0010502	0.215	30.42	57	1	Inf	57	1	14.79	57	MP:0010502	ventricle myocardium hypoplasia
/fs0/chenr6/Database_fs0/MGI/processing/term.gene/MP:0011518 (7)	MP:0011518	0.215	30.42	104	1	Inf	104	1	9.81	104	MP:0011518	abnormal cell chemotaxis
/fs0/chenr6/Database_fs0/MGI/processing/term.gene/MP:0000280 (5)	MP:0000280	0.217	Inf	87	1	Inf	87	1	Inf	87	MP:0000280	thin ventricular wall
/fs0/chenr6/Database_fs0/MGI/processing/term.gene/MP:0000743 (5)	MP:0000743	0.217	Inf	57	1	Inf	57	1	Inf	57	MP:0000743	muscle spasm
/fs0/chenr6/Database_fs0/MGI/processing/term.gene/MP:0001212 (5)	MP:0001212	0.217	Inf	75	1	Inf	75	1	Inf	75	MP:0001212	skin lesions
/fs0/chenr6/Database_fs0/MGI/processing/term.gene/MP:0001898 (5)	MP:0001898	0.217	Inf	67	1	Inf	67	1	Inf	67	MP:0001898	abnormal long term depression
/fs0/chenr6/Database_fs0/MGI/processing/term.gene/MP:0004874 (5)	MP:0004874	0.217	Inf	54	1	Inf	54	1	Inf	54	MP:0004874	abnormal timing of postnatal eyelid opening
/fs0/chenr6/Database_fs0/MGI/processing/term.gene/MP:0009046 (5)	MP:0009046	0.217	Inf	60	1	Inf	60	1	Inf	60	MP:0009046	muscle twitch
/fs0/chenr6/Database_fs0/MGI/processing/term.gene/MP:0001574 (27)	MP:0001574	0.227	4.79	219	1	6.36	219	1	3.74	219	MP:0001574	abnormal oxygen level
/fs0/chenr6/Database_fs0/MGI/processing/term.gene/MP:0005017 (27)	MP:0005017	0.227	4.79	323	0.799	7.32	323	1	3.1	323	MP:0005017	decreased B cell number
/fs0/chenr6/Database_fs0/MGI/processing/term.gene/MP:0000812 (12)	MP:0000812	0.255	10.2	66	1	5.25	66	0.489	11.75	66	MP:0000812	abnormal dentate gyrus morphology
/fs0/chenr6/Database_fs0/MGI/processing/term.gene/MP:0009956 (12)	MP:0009956	0.255	10.2	196	1	5.28	196	0.171	17.62	196	MP:0009956	abnormal cerebellar layer morphology
/fs0/chenr6/Database_fs0/MGI/processing/term.gene/MP:0001362 (24)	MP:0001362	0.263	5.15	283	0.396	8.79	283	1	2.47	283	MP:0001362	abnormal anxiety-related response
/fs0/chenr6/Database_fs0/MGI/processing/term.gene/MP:0001695 (24)	MP:0001695	0.263	5.15	293	1	6.5	293	1	3.74	293	MP:0001695	abnormal gastrulation
/fs0/chenr6/Database_fs0/MGI/processing/term.gene/MP:0002493 (24)	MP:0002493	0.263	5.15	168	1	4.48	168	1	6.73	168	MP:0002493	increased IgG level
/fs0/chenr6/Database_fs0/MGI/processing/term.gene/MP:0008835 (24)	MP:0008835	0.263	5.15	318	1	3.98	318	0.661	6.53	318	MP:0008835	abnormal intercellular signaling peptide or protein level
/fs0/chenr6/Database_fs0/MGI/processing/term.gene/MP:0011092 (24)	MP:0011092	0.263	5.15	318	1	3.04	318	0.282	10.12	318	MP:0011092	embryonic lethality, complete penetrance
/fs0/chenr6/Database_fs0/MGI/processing/term.gene/MP:0011182 (99)	MP:0011182	0.279	2.42	1166	1	3.13	1166	1	2.1	1166	MP:0011182	decreased hematopoietic cell number
/fs0/chenr6/Database_fs0/MGI/processing/term.gene/MP:0005018 (38)	MP:0005018	0.281	3.77	509	1	3.64	509	1	4.55	509	MP:0005018	decreased T cell number
/fs0/chenr6/Database_fs0/MGI/processing/term.gene/MP:0010273 (31)	MP:0010273	0.296	4.25	315	0.201	8.3	315	1	2.25	315	MP:0010273	increased classified tumor incidence
/fs0/chenr6/Database_fs0/MGI/processing/term.gene/MP:0020188 (31)	MP:0020188	0.296	4.25	316	0.201	8.3	316	1	2.25	316	MP:0020188	abnormal classified tumor incidence
/fs0/chenr6/Database_fs0/MGI/processing/term.gene/MP:0000934 (15)	MP:0000934	0.305	7.67	98	1	5.34	98	1	12.45	98	MP:0000934	abnormal telencephalon development
/fs0/chenr6/Database_fs0/MGI/processing/term.gene/MP:0001876 (15)	MP:0001876	0.305	7.67	222	1	5.34	222	0.809	15.03	222	MP:0001876	decreased inflammatory response
/fs0/chenr6/Database_fs0/MGI/processing/term.gene/MP:0002494 (15)	MP:0002494	0.305	7.67	95	1	10.7	95	1	6.22	95	MP:0002494	increased IgM level
/fs0/chenr6/Database_fs0/MGI/processing/term.gene/MP:0008751 (18)	MP:0008751	0.313	6.41	217	1	7.97	217	1	7.04	217	MP:0008751	abnormal interleukin level
/fs0/chenr6/Database_fs0/MGI/processing/term.gene/MP:0002722 (91)	MP:0002722	0.324	2.47	1017	1	2.91	1017	1	2.42	1017	MP:0002722	abnormal immune system organ morphology
/fs0/chenr6/Database_fs0/MGI/processing/term.gene/MP:0003009 (46)	MP:0003009	0.337	3.34	530	1	2.91	530	1	3.74	530	MP:0003009	abnormal cytokine secretion
/fs0/chenr6/Database_fs0/MGI/processing/term.gene/MP:0002406 (28)	MP:0002406	0.361	4.47	371	1	2.66	371	0.182	7.29	371	MP:0002406	increased susceptibility to infection
/fs0/chenr6/Database_fs0/MGI/processing/term.gene/MP:0002461 (28)	MP:0002461	0.361	4.47	238	1	3.83	238	1	5.07	238	MP:0002461	increased immunoglobulin level
/fs0/chenr6/Database_fs0/MGI/processing/term.gene/MP:0000452 (39)	MP:0000452	0.403	3.61	405	1	6.27	405	1	3.24	405	MP:0000452	abnormal mouth morphology
/fs0/chenr6/Database_fs0/MGI/processing/term.gene/MP:0000771 (25)	MP:0000771	0.432	4.75	225	1	5.44	225	1	4.28	225	MP:0000771	abnormal brain size
/fs0/chenr6/Database_fs0/MGI/processing/term.gene/MP:0001951 (25)	MP:0001951	0.432	4.75	236	1	2.11	236	0.349	6.37	236	MP:0001951	abnormal breathing pattern
/fs0/chenr6/Database_fs0/MGI/processing/term.gene/MP:0011108 (25)	MP:0011108	0.432	4.75	227	1	5.41	227	1	4.28	227	MP:0011108	embryonic lethality during organogenesis, incomplete penetrance
/fs0/chenr6/Database_fs0/MGI/processing/term.gene/MP:0001175 (43)	MP:0001175	0.439	3.39	442	0.731	6.21	442	1	3.02	442	MP:0001175	abnormal lung morphology
/fs0/chenr6/Database_fs0/MGI/processing/term.gene/MP:0002459 (43)	MP:0002459	0.439	3.39	498	1	2.9	498	1	4.23	498	MP:0002459	abnormal B cell physiology
/fs0/chenr6/Database_fs0/MGI/processing/term.gene/MP:0005460 (43)	MP:0005460	0.439	3.39	481	1	4.5	481	1	3.02	481	MP:0005460	abnormal leukopoiesis
/fs0/chenr6/Database_fs0/MGI/processing/term.gene/MP:0000968 (10)	MP:0000968	0.444	11.87	81	1	10.55	81	0.809	15.03	81	MP:0000968	abnormal sensory neuron innervation pattern
/fs0/chenr6/Database_fs0/MGI/processing/term.gene/MP:0002068 (10)	MP:0002068	0.444	11.87	129	1	5.31	129	1	Inf	129	MP:0002068	abnormal parental behavior
/fs0/chenr6/Database_fs0/MGI/processing/term.gene/MP:0003410 (10)	MP:0003410	0.444	11.87	103	1	15.94	103	1	9.91	103	MP:0003410	abnormal artery development
/fs0/chenr6/Database_fs0/MGI/processing/term.gene/MP:0008779 (10)	MP:0008779	0.444	11.87	103	1	5.31	103	1	Inf	103	MP:0008779	abnormal maternal behavior
/fs0/chenr6/Database_fs0/MGI/processing/term.gene/MP:0009538 (10)	MP:0009538	0.444	11.87	139	1	7.97	139	1	19.82	139	MP:0009538	abnormal synapse morphology
/fs0/chenr6/Database_fs0/MGI/processing/term.gene/MP:0009967 (10)	MP:0009967	0.444	11.87	74	1	13.47	74	1	9.81	74	MP:0009967	abnormal neuron proliferation
/fs0/chenr6/Database_fs0/MGI/processing/term.gene/MP:0000717 (84)	MP:0000717	0.465	2.5	975	1	3.14	975	1	2.12	975	MP:0000717	abnormal lymphocyte cell number
/fs0/chenr6/Database_fs0/MGI/processing/term.gene/MP:0000959 (47)	MP:0000959	0.465	3.23	541	1	2.91	541	1	3.4	541	MP:0000959	abnormal somatic sensory system morphology
/fs0/chenr6/Database_fs0/MGI/processing/term.gene/MP:0000822 (22)	MP:0000822	0.504	5.13	207	1	5.41	207	1	6.22	207	MP:0000822	abnormal brain ventricle morphology
/fs0/chenr6/Database_fs0/MGI/processing/term.gene/MP:0001954 (22)	MP:0001954	0.504	5.13	175	1	2.64	175	0.661	6.53	175	MP:0001954	respiratory distress
/fs0/chenr6/Database_fs0/MGI/processing/term.gene/MP:0008247 (111)	MP:0008247	0.515	2.25	1308	0.377	3.23	1308	1	1.72	1308	MP:0008247	abnormal mononuclear cell morphology
/fs0/chenr6/Database_fs0/MGI/processing/term.gene/MP:0003984 (36)	MP:0003984	0.518	3.69	429	1	3.8	429	1	3.66	429	MP:0003984	embryonic growth retardation
/fs0/chenr6/Database_fs0/MGI/processing/term.gene/MP:0005025 (36)	MP:0005025	0.518	3.69	482	1	1.63	482	0.052	6.87	482	MP:0005025	abnormal response to infection
/fs0/chenr6/Database_fs0/MGI/processing/term.gene/MP:0000955 (29)	MP:0000955	0.558	4.19	241	1	4.05	241	1	5.7	241	MP:0000955	abnormal spinal cord morphology
/fs0/chenr6/Database_fs0/MGI/processing/term.gene/MP:0002451 (29)	MP:0002451	0.558	4.19	343	1	4.63	343	1	4.03	343	MP:0002451	abnormal macrophage physiology
/fs0/chenr6/Database_fs0/MGI/processing/term.gene/MP:0000774 (19)	MP:0000774	0.564	5.69	186	1	5.41	186	1	8.3	186	MP:0000774	decreased brain size
/fs0/chenr6/Database_fs0/MGI/processing/term.gene/MP:0010942 (19)	MP:0010942	0.564	5.69	175	1	13.47	175	1	4.28	175	MP:0010942	abnormal respiratory epithelium morphology
/fs0/chenr6/Database_fs0/MGI/processing/term.gene/MP:0000443 (13)	MP:0000443	0.566	8.16	156	1	21.4	156	1	4.95	156	MP:0000443	abnormal snout morphology
/fs0/chenr6/Database_fs0/MGI/processing/term.gene/MP:0004881 (13)	MP:0004881	0.566	8.16	128	1	10.7	128	1	8.3	128	MP:0004881	abnormal lung size
/fs0/chenr6/Database_fs0/MGI/processing/term.gene/MP:0008022 (13)	MP:0008022	0.566	8.16	107	1	15.94	107	1	4.97	107	MP:0008022	dilated heart ventricle
/fs0/chenr6/Database_fs0/MGI/processing/term.gene/MP:0004939 (40)	MP:0004939	0.571	3.45	499	1	4.5	499	1	2.49	499	MP:0004939	abnormal B cell morphology
/fs0/chenr6/Database_fs0/MGI/processing/term.gene/MP:0008873 (16)	MP:0008873	0.595	6.57	207	1	10.85	207	1	3.69	207	MP:0008873	increased physiological sensitivity to xenobiotic
/fs0/chenr6/Database_fs0/MGI/processing/term.gene/MP:0005377 (44)	MP:0005377	0.609	3.27	609	1	3.16	609	1	3.1	609	MP:0005377	hearing/vestibular/ear phenotype
/fs0/chenr6/Database_fs0/MGI/processing/term.gene/MP:0008195 (56)	MP:0008195	0.637	2.89	741	0.313	4.58	741	1	1.99	741	MP:0008195	abnormal professional antigen presenting cell morphology
/fs0/chenr6/Database_fs0/MGI/processing/term.gene/MP:0003727 (33)	MP:0003727	0.661	3.8	351	1	3.23	351	1	4.03	351	MP:0003727	abnormal retinal layer morphology
/fs0/chenr6/Database_fs0/MGI/processing/term.gene/MP:0003878 (33)	MP:0003878	0.661	3.8	439	1	3.59	439	1	3.35	439	MP:0003878	abnormal ear physiology
/fs0/chenr6/Database_fs0/MGI/processing/term.gene/MP:0005164 (33)	MP:0005164	0.661	3.8	418	1	5.51	418	1	2.47	418	MP:0005164	abnormal response to injury
/fs0/chenr6/Database_fs0/MGI/processing/term.gene/MP:0002619 (90)	MP:0002619	0.663	2.38	1058	1	2.91	1058	1	2.09	1058	MP:0002619	abnormal lymphocyte morphology
/fs0/chenr6/Database_fs0/MGI/processing/term.gene/MP:0013560 (73)	MP:0013560	0.706	2.57	681	0.239	4.41	681	1	1.88	681	MP:0013560	abnormal endocrine gland morphology
/fs0/chenr6/Database_fs0/MGI/processing/term.gene/MP:0013658 (122)	MP:0013658	0.721	2.14	1421	1	2.26	1421	1	2.23	1421	MP:0013658	abnormal myeloid cell morphology
/fs0/chenr6/Database_fs0/MGI/processing/term.gene/MP:0000875 (8)	MP:0000875	0.74	15.22	160	1	10.55	160	1	24.91	160	MP:0000875	abnormal cerebellar Purkinje cell layer
/fs0/chenr6/Database_fs0/MGI/processing/term.gene/MP:0000877 (8)	MP:0000877	0.74	15.22	146	1	10.55	146	1	24.91	146	MP:0000877	abnormal Purkinje cell morphology
/fs0/chenr6/Database_fs0/MGI/processing/term.gene/MP:0013659 (65)	MP:0013659	0.781	2.67	730	1	2.45	730	1	3.27	730	MP:0013659	abnormal erythroid lineage cell morphology
/fs0/chenr6/Database_fs0/MGI/processing/term.gene/MP:0001953 (23)	MP:0001953	0.823	4.7	145	1	5.41	145	1	4.97	145	MP:0001953	respiratory failure
/fs0/chenr6/Database_fs0/MGI/processing/term.gene/MP:0008713 (23)	MP:0008713	0.823	4.7	309	1	3.98	309	1	5.77	309	MP:0008713	abnormal cytokine level
/fs0/chenr6/Database_fs0/MGI/processing/term.gene/MP:0011180 (137)	MP:0011180	0.854	2.05	1577	1	2.72	1577	1	1.73	1577	MP:0011180	abnormal hematopoietic cell number
/fs0/chenr6/Database_fs0/MGI/processing/term.gene/MP:0003084 (20)	MP:0003084	0.964	5.12	154	1	3.55	154	1	6	154	MP:0003084	abnormal skeletal muscle fiber morphology
/fs0/chenr6/Database_fs0/MGI/processing/term.gene/MP:0003105 (20)	MP:0003105	0.964	5.12	156	1	6.73	156	1	4.99	156	MP:0003105	abnormal heart atrium morphology
/fs0/chenr6/Database_fs0/MGI/processing/term.gene/MP:0009745 (20)	MP:0009745	0.964	5.12	255	1	2.65	255	0.626	8.09	255	MP:0009745	abnormal behavioral response to xenobiotic
/fs0/chenr6/Database_fs0/MGI/processing/term.gene/MP:0003945 (66)	MP:0003945	0.996	2.61	802	1	2.32	802	1	3.51	802	MP:0003945	abnormal lymphocyte physiology
/fs0/chenr6/Database_fs0/MGI/processing/term.gene/MP:0000003 (73)	MP:0000003	1	2.24	785	1	2.55	785	1	2.31	785	MP:0000003	abnormal adipose tissue morphology
/fs0/chenr6/Database_fs0/MGI/processing/term.gene/MP:0000010 (21)	MP:0000010	1	1.57	186	1	1.5	186	1	1.84	186	MP:0000010	abnormal abdominal fat pad morphology
/fs0/chenr6/Database_fs0/MGI/processing/term.gene/MP:0000026 (13)	MP:0000026	1	3.15	241	1	7.97	241	1	1.84	241	MP:0000026	abnormal inner ear morphology
/fs0/chenr6/Database_fs0/MGI/processing/term.gene/MP:0000031 (11)	MP:0000031	1	4.21	206	1	7.97	206	1	2.46	206	MP:0000031	abnormal cochlea morphology
/fs0/chenr6/Database_fs0/MGI/processing/term.gene/MP:0000032 (3)	MP:0000032	1	10.02	56	1	Inf	56	1	4.88	56	MP:0000032	cochlear degeneration
/fs0/chenr6/Database_fs0/MGI/processing/term.gene/MP:0000034 (5)	MP:0000034	1	7.54	66	1	Inf	66	1	4.9	66	MP:0000034	abnormal inner ear vestibule morphology
/fs0/chenr6/Database_fs0/MGI/processing/term.gene/MP:0000035 (13)	MP:0000035	1	3.15	218	1	7.97	218	1	1.84	218	MP:0000035	abnormal membranous labyrinth morphology
/fs0/chenr6/Database_fs0/MGI/processing/term.gene/MP:0000042 (7)	MP:0000042	1	3.77	168	1	5.28	168	1	1.22	168	MP:0000042	abnormal organ of Corti morphology
/fs0/chenr6/Database_fs0/MGI/processing/term.gene/MP:0000045 (8)	MP:0000045	1	5.04	170	1	7.97	170	1	2.45	170	MP:0000045	abnormal hair cell morphology
/fs0/chenr6/Database_fs0/MGI/processing/term.gene/MP:0000049 (4)	MP:0000049	1	1.67	72	1	Inf	72	1	0	72	MP:0000049	abnormal middle ear morphology
/fs0/chenr6/Database_fs0/MGI/processing/term.gene/MP:0000060 (7)	MP:0000060	1	3.77	106	1	5.25	106	1	3.27	106	MP:0000060	delayed bone ossification
/fs0/chenr6/Database_fs0/MGI/processing/term.gene/MP:0000062 (9)	MP:0000062	1	2.51	110	1	3.52	110	1	3.27	110	MP:0000062	increased bone mineral density
/fs0/chenr6/Database_fs0/MGI/processing/term.gene/MP:0000063 (19)	MP:0000063	1	1.33	266	1	0.87	266	1	1.63	266	MP:0000063	decreased bone mineral density
/fs0/chenr6/Database_fs0/MGI/processing/term.gene/MP:0000074 (12)	MP:0000074	1	5.06	197	1	10.7	197	1	2.45	197	MP:0000074	abnormal neurocranium morphology
/fs0/chenr6/Database_fs0/MGI/processing/term.gene/MP:0000088 (5)	MP:0000088	1	20.16	56	1	Inf	56	1	4.88	56	MP:0000088	short mandible
/fs0/chenr6/Database_fs0/MGI/processing/term.gene/MP:0000102 (3)	MP:0000102	1	2.5	55	1	Inf	55	1	0	55	MP:0000102	abnormal nasal bone morphology
/fs0/chenr6/Database_fs0/MGI/processing/term.gene/MP:0000104 (4)	MP:0000104	1	5.01	63	1	Inf	63	1	2.44	63	MP:0000104	abnormal sphenoid bone morphology
/fs0/chenr6/Database_fs0/MGI/processing/term.gene/MP:0000107 (4)	MP:0000107	1	5.01	63	1	Inf	63	1	0	63	MP:0000107	abnormal frontal bone morphology
/fs0/chenr6/Database_fs0/MGI/processing/term.gene/MP:0000109 (3)	MP:0000109	1	10.02	53	1	Inf	53	1	0	53	MP:0000109	abnormal parietal bone morphology
/fs0/chenr6/Database_fs0/MGI/processing/term.gene/MP:0000111 (19)	MP:0000111	1	4.59	200	1	13.47	200	1	4.14	200	MP:0000111	cleft palate
/fs0/chenr6/Database_fs0/MGI/processing/term.gene/MP:0000116 (4)	MP:0000116	1	5.01	62	1	10.55	62	1	0	62	MP:0000116	abnormal tooth development
/fs0/chenr6/Database_fs0/MGI/processing/term.gene/MP:0000130 (15)	MP:0000130	1	3.37	221	1	4.27	221	1	2.45	221	MP:0000130	abnormal trabecular bone morphology
/fs0/chenr6/Database_fs0/MGI/processing/term.gene/MP:0000134 (5)	MP:0000134	1	1.25	95	1	2.62	95	1	0	95	MP:0000134	abnormal compact bone thickness
/fs0/chenr6/Database_fs0/MGI/processing/term.gene/MP:0000135 (5)	MP:0000135	1	1.25	68	1	2.62	68	1	0	68	MP:0000135	decreased compact bone thickness
/fs0/chenr6/Database_fs0/MGI/processing/term.gene/MP:0000136 (5)	MP:0000136	1	3.34	69	1	5.28	69	1	0	69	MP:0000136	abnormal microglial cell morphology
/fs0/chenr6/Database_fs0/MGI/processing/term.gene/MP:0000137 (41)	MP:0000137	1	1.22	458	1	2	458	1	0.57	458	MP:0000137	abnormal vertebrae morphology
/fs0/chenr6/Database_fs0/MGI/processing/term.gene/MP:0000150 (26)	MP:0000150	1	0.91	299	1	0.75	299	1	0.97	299	MP:0000150	abnormal rib morphology
/fs0/chenr6/Database_fs0/MGI/processing/term.gene/MP:0000154 (2)	MP:0000154	1	0	65	1	0	65	1	0	65	MP:0000154	rib fusion
/fs0/chenr6/Database_fs0/MGI/processing/term.gene/MP:0000157 (10)	MP:0000157	1	5.05	164	1	3.52	164	1	4.93	164	MP:0000157	abnormal sternum morphology
/fs0/chenr6/Database_fs0/MGI/processing/term.gene/MP:0000160 (18)	MP:0000160	1	3.22	152	1	3.04	152	1	3.69	152	MP:0000160	kyphosis
/fs0/chenr6/Database_fs0/MGI/processing/term.gene/MP:0000163 (24)	MP:0000163	1	2.53	269	1	1.31	269	1	4.28	269	MP:0000163	abnormal cartilage morphology
/fs0/chenr6/Database_fs0/MGI/processing/term.gene/MP:0000164 (11)	MP:0000164	1	1.11	137	1	0	137	1	2.45	137	MP:0000164	abnormal cartilage development
/fs0/chenr6/Database_fs0/MGI/processing/term.gene/MP:0000165 (7)	MP:0000165	1	0.83	93	1	0	93	1	1.22	93	MP:0000165	abnormal long bone hypertrophic chondrocyte zone
/fs0/chenr6/Database_fs0/MGI/processing/term.gene/MP:0000166 (4)	MP:0000166	1	5.01	67	1	2.62	67	1	Inf	67	MP:0000166	abnormal chondrocyte morphology
/fs0/chenr6/Database_fs0/MGI/processing/term.gene/MP:0000172 (17)	MP:0000172	1	5.75	135	1	2.11	135	0.489	11.75	135	MP:0000172	abnormal bone marrow cell number
/fs0/chenr6/Database_fs0/MGI/processing/term.gene/MP:0000180 (41)	MP:0000180	1	1.86	431	1	1.47	431	1	2.67	431	MP:0000180	abnormal circulating cholesterol level
/fs0/chenr6/Database_fs0/MGI/processing/term.gene/MP:0000181 (13)	MP:0000181	1	3.15	112	1	1.75	112	1	9.91	112	MP:0000181	abnormal circulating LDL cholesterol level
/fs0/chenr6/Database_fs0/MGI/processing/term.gene/MP:0000183 (8)	MP:0000183	1	3.01	66	1	1.05	66	1	Inf	66	MP:0000183	decreased circulating LDL cholesterol level
/fs0/chenr6/Database_fs0/MGI/processing/term.gene/MP:0000184 (22)	MP:0000184	1	2.36	219	1	1.93	219	1	3.96	219	MP:0000184	abnormal circulating HDL cholesterol level
/fs0/chenr6/Database_fs0/MGI/processing/term.gene/MP:0000186 (9)	MP:0000186	1	2.51	127	1	1.05	127	1	9.81	127	MP:0000186	decreased circulating HDL cholesterol level
/fs0/chenr6/Database_fs0/MGI/processing/term.gene/MP:0000187 (40)	MP:0000187	1	1.46	403	1	1.9	403	1	1.15	403	MP:0000187	abnormal triglyceride level
/fs0/chenr6/Database_fs0/MGI/processing/term.gene/MP:0000188 (61)	MP:0000188	1	1.51	644	1	1.62	644	1	1.32	644	MP:0000188	abnormal circulating glucose level
/fs0/chenr6/Database_fs0/MGI/processing/term.gene/MP:0000189 (13)	MP:0000189	1	2.23	93	1	3.52	93	1	1.4	93	MP:0000189	hypoglycemia
/fs0/chenr6/Database_fs0/MGI/processing/term.gene/MP:0000192 (33)	MP:0000192	1	2.21	426	1	1.98	426	1	2.5	426	MP:0000192	abnormal mineral level
/fs0/chenr6/Database_fs0/MGI/processing/term.gene/MP:0000194 (2)	MP:0000194	1	0	56	1	0	56	1	0	56	MP:0000194	increased circulating calcium level
/fs0/chenr6/Database_fs0/MGI/processing/term.gene/MP:0000195 (3)	MP:0000195	1	2.5	55	1	0	55	1	2.44	55	MP:0000195	decreased circulating calcium level
/fs0/chenr6/Database_fs0/MGI/processing/term.gene/MP:0000199 (15)	MP:0000199	1	1.82	133	1	0	133	1	2.47	133	MP:0000199	abnormal circulating serum albumin level
/fs0/chenr6/Database_fs0/MGI/processing/term.gene/MP:0000202 (10)	MP:0000202	1	1.25	207	1	0	207	1	2.45	207	MP:0000202	abnormal circulating alkaline phosphatase level
/fs0/chenr6/Database_fs0/MGI/processing/term.gene/MP:0000203 (9)	MP:0000203	1	1.43	100	1	0	100	1	3.27	100	MP:0000203	abnormal circulating aspartate transaminase level
/fs0/chenr6/Database_fs0/MGI/processing/term.gene/MP:0000208 (12)	MP:0000208	1	2.51	151	1	1.75	151	1	2.95	151	MP:0000208	decreased hematocrit
/fs0/chenr6/Database_fs0/MGI/processing/term.gene/MP:0000218 (72)	MP:0000218	1	1.98	822	1	2.89	822	1	1.5	822	MP:0000218	increased leukocyte cell number
/fs0/chenr6/Database_fs0/MGI/processing/term.gene/MP:0000219 (11)	MP:0000219	1	4.21	138	1	15.94	138	1	2.45	138	MP:0000219	increased neutrophil cell number
/fs0/chenr6/Database_fs0/MGI/processing/term.gene/MP:0000220 (11)	MP:0000220	1	2.87	115	1	7.97	115	1	1.22	115	MP:0000220	increased monocyte cell number
/fs0/chenr6/Database_fs0/MGI/processing/term.gene/MP:0000222 (17)	MP:0000222	1	1.07	116	1	1.05	116	1	0.97	116	MP:0000222	decreased neutrophil cell number
/fs0/chenr6/Database_fs0/MGI/processing/term.gene/MP:0000223 (8)	MP:0000223	1	0.71	81	1	0	81	1	0.97	81	MP:0000223	decreased monocyte cell number
/fs0/chenr6/Database_fs0/MGI/processing/term.gene/MP:0000226 (14)	MP:0000226	1	3.79	201	1	1.75	201	1	4.97	201	MP:0000226	abnormal mean corpuscular volume
/fs0/chenr6/Database_fs0/MGI/processing/term.gene/MP:0000230 (17)	MP:0000230	1	1.07	201	1	2.65	201	1	0	201	MP:0000230	abnormal systemic arterial blood pressure
/fs0/chenr6/Database_fs0/MGI/processing/term.gene/MP:0000240 (10)	MP:0000240	1	5.05	103	1	5.25	103	1	4.95	103	MP:0000240	extramedullary hematopoiesis
/fs0/chenr6/Database_fs0/MGI/processing/term.gene/MP:0000242 (3)	MP:0000242	1	0	64	1	0	64	1	0	64	MP:0000242	impaired fertilization
/fs0/chenr6/Database_fs0/MGI/processing/term.gene/MP:0000245 (11)	MP:0000245	1	6.08	105	1	1.75	105	1	12.45	105	MP:0000245	abnormal erythropoiesis
/fs0/chenr6/Database_fs0/MGI/processing/term.gene/MP:0000255 (5)	MP:0000255	1	1.25	53	1	0	53	1	2.44	53	MP:0000255	vasculature congestion
/fs0/chenr6/Database_fs0/MGI/processing/term.gene/MP:0000269 (9)	MP:0000269	1	2.51	99	1	5.28	99	1	1.22	99	MP:0000269	abnormal heart looping
/fs0/chenr6/Database_fs0/MGI/processing/term.gene/MP:0000270 (8)	MP:0000270	1	1.67	58	1	0	58	1	2.45	58	MP:0000270	abnormal heart tube morphology
/fs0/chenr6/Database_fs0/MGI/processing/term.gene/MP:0000272 (17)	MP:0000272	1	5.75	165	1	10.85	165	1	2.1	165	MP:0000272	abnormal aorta morphology
/fs0/chenr6/Database_fs0/MGI/processing/term.gene/MP:0000278 (15)	MP:0000278	1	4.44	134	1	2.62	134	1	4.28	134	MP:0000278	abnormal myocardial fiber morphology
/fs0/chenr6/Database_fs0/MGI/processing/term.gene/MP:0000282 (9)	MP:0000282	1	6.32	75	1	7.97	75	1	4.9	75	MP:0000282	abnormal interatrial septum morphology
/fs0/chenr6/Database_fs0/MGI/processing/term.gene/MP:0000284 (13)	MP:0000284	1	5.93	109	1	10.7	109	1	2.95	109	MP:0000284	double outlet right ventricle
/fs0/chenr6/Database_fs0/MGI/processing/term.gene/MP:0000285 (13)	MP:0000285	1	5.93	110	1	5.31	110	1	6.6	110	MP:0000285	abnormal heart valve morphology
/fs0/chenr6/Database_fs0/MGI/processing/term.gene/MP:0000292 (2)	MP:0000292	1	5	51	1	5.25	51	1	0	51	MP:0000292	distended pericardium
/fs0/chenr6/Database_fs0/MGI/processing/term.gene/MP:0000297 (7)	MP:0000297	1	12.64	53	1	Inf	53	1	7.39	53	MP:0000297	abnormal atrioventricular cushion morphology
/fs0/chenr6/Database_fs0/MGI/processing/term.gene/MP:0000322 (24)	MP:0000322	1	4.34	233	1	5.34	233	1	4.39	233	MP:0000322	increased granulocyte number
/fs0/chenr6/Database_fs0/MGI/processing/term.gene/MP:0000333 (10)	MP:0000333	1	5.05	86	1	5.28	86	1	4.93	86	MP:0000333	decreased bone marrow cell number
/fs0/chenr6/Database_fs0/MGI/processing/term.gene/MP:0000334 (26)	MP:0000334	1	2.25	207	1	2.65	207	1	2.06	207	MP:0000334	decreased granulocyte number
/fs0/chenr6/Database_fs0/MGI/processing/term.gene/MP:0000343 (6)	MP:0000343	1	2.5	72	1	5.25	72	1	1.63	72	MP:0000343	altered response to myocardial infarction
/fs0/chenr6/Database_fs0/MGI/processing/term.gene/MP:0000351 (16)	MP:0000351	1	1.67	148	1	1.75	148	1	1.63	148	MP:0000351	increased cell proliferation
/fs0/chenr6/Database_fs0/MGI/processing/term.gene/MP:0000358 (88)	MP:0000358	1	1.83	936	1	1.79	936	1	2.01	936	MP:0000358	abnormal cell morphology
/fs0/chenr6/Database_fs0/MGI/processing/term.gene/MP:0000371 (4)	MP:0000371	1	15.08	57	1	5.25	57	1	9.81	57	MP:0000371	diluted coat color
/fs0/chenr6/Database_fs0/MGI/processing/term.gene/MP:0000377 (13)	MP:0000377	1	3.15	122	1	5.34	122	1	1.96	122	MP:0000377	abnormal hair follicle morphology
/fs0/chenr6/Database_fs0/MGI/processing/term.gene/MP:0000414 (6)	MP:0000414	1	10.08	93	1	10.55	93	1	9.81	93	MP:0000414	alopecia
/fs0/chenr6/Database_fs0/MGI/processing/term.gene/MP:0000416 (6)	MP:0000416	1	2.5	76	1	0	76	1	9.81	76	MP:0000416	sparse hair
/fs0/chenr6/Database_fs0/MGI/processing/term.gene/MP:0000433 (6)	MP:0000433	1	10.08	68	1	5.28	68	1	Inf	68	MP:0000433	microcephaly
/fs0/chenr6/Database_fs0/MGI/processing/term.gene/MP:0000436 (6)	MP:0000436	1	2.5	87	1	Inf	87	1	1.22	87	MP:0000436	abnormal head movements
/fs0/chenr6/Database_fs0/MGI/processing/term.gene/MP:0000440 (7)	MP:0000440	1	3.77	71	1	5.28	71	1	2.44	71	MP:0000440	domed cranium
/fs0/chenr6/Database_fs0/MGI/processing/term.gene/MP:0000445 (8)	MP:0000445	1	5.04	108	1	Inf	108	1	3.69	108	MP:0000445	short snout
/fs0/chenr6/Database_fs0/MGI/processing/term.gene/MP:0000455 (7)	MP:0000455	1	6.72	116	1	10.55	116	1	9.81	116	MP:0000455	abnormal maxilla morphology
/fs0/chenr6/Database_fs0/MGI/processing/term.gene/MP:0000459 (23)	MP:0000459	1	1.39	264	1	2.66	264	1	0.48	264	MP:0000459	abnormal presacral vertebrae morphology
/fs0/chenr6/Database_fs0/MGI/processing/term.gene/MP:0000461 (9)	MP:0000461	1	0.62	94	1	1.05	94	1	0	94	MP:0000461	decreased presacral vertebrae number
/fs0/chenr6/Database_fs0/MGI/processing/term.gene/MP:0000467 (7)	MP:0000467	1	6.72	55	1	10.55	55	1	4.9	55	MP:0000467	abnormal esophagus morphology
/fs0/chenr6/Database_fs0/MGI/processing/term.gene/MP:0000470 (18)	MP:0000470	1	5.11	139	0.9	26.95	139	1	3.1	139	MP:0000470	abnormal stomach morphology
/fs0/chenr6/Database_fs0/MGI/processing/term.gene/MP:0000477 (24)	MP:0000477	1	2.53	313	1	2.97	313	1	3.29	313	MP:0000477	abnormal intestine morphology
/fs0/chenr6/Database_fs0/MGI/processing/term.gene/MP:0000480 (6)	MP:0000480	1	1	75	1	0	75	1	1.22	75	MP:0000480	increased rib number
/fs0/chenr6/Database_fs0/MGI/processing/term.gene/MP:0000484 (4)	MP:0000484	1	5.01	51	1	10.55	51	1	2.44	51	MP:0000484	abnormal pulmonary artery morphology
/fs0/chenr6/Database_fs0/MGI/processing/term.gene/MP:0000488 (13)	MP:0000488	1	3.15	146	1	4.27	146	1	3.27	146	MP:0000488	abnormal intestinal epithelium morphology
/fs0/chenr6/Database_fs0/MGI/processing/term.gene/MP:0000489 (9)	MP:0000489	1	2.51	133	1	1.75	133	1	4.93	133	MP:0000489	abnormal large intestine morphology
/fs0/chenr6/Database_fs0/MGI/processing/term.gene/MP:0000490 (9)	MP:0000490	1	2.51	88	1	2.64	88	1	4.9	88	MP:0000490	abnormal crypts of Lieberkuhn morphology
/fs0/chenr6/Database_fs0/MGI/processing/term.gene/MP:0000495 (8)	MP:0000495	1	1.67	89	1	1.75	89	1	3.27	89	MP:0000495	abnormal colon morphology
/fs0/chenr6/Database_fs0/MGI/processing/term.gene/MP:0000496 (13)	MP:0000496	1	4.34	117	1	5.34	117	1	4.9	117	MP:0000496	abnormal small intestine morphology
/fs0/chenr6/Database_fs0/MGI/processing/term.gene/MP:0000511 (11)	MP:0000511	1	2.87	124	1	3.98	124	1	3.27	124	MP:0000511	abnormal intestinal mucosa morphology
/fs0/chenr6/Database_fs0/MGI/processing/term.gene/MP:0000519 (11)	MP:0000519	1	1.88	89	1	2.64	89	1	1.22	89	MP:0000519	hydronephrosis
/fs0/chenr6/Database_fs0/MGI/processing/term.gene/MP:0000521 (25)	MP:0000521	1	3.4	262	1	2.64	262	1	4.03	262	MP:0000521	abnormal kidney cortex morphology
/fs0/chenr6/Database_fs0/MGI/processing/term.gene/MP:0000523 (17)	MP:0000523	1	2.75	133	1	1.75	133	1	3.1	133	MP:0000523	cortical renal glomerulopathies
/fs0/chenr6/Database_fs0/MGI/processing/term.gene/MP:0000527 (4)	MP:0000527	1	15.08	81	1	Inf	81	1	9.81	81	MP:0000527	abnormal kidney development
/fs0/chenr6/Database_fs0/MGI/processing/term.gene/MP:0000530 (6)	MP:0000530	1	2.5	63	1	0	63	1	2.45	63	MP:0000530	abnormal kidney blood vessel morphology
/fs0/chenr6/Database_fs0/MGI/processing/term.gene/MP:0000534 (14)	MP:0000534	1	2.8	124	1	5.34	124	1	1.96	124	MP:0000534	abnormal ureter morphology
/fs0/chenr6/Database_fs0/MGI/processing/term.gene/MP:0000547 (5)	MP:0000547	1	1.25	87	1	2.62	87	1	0	87	MP:0000547	short limbs
/fs0/chenr6/Database_fs0/MGI/processing/term.gene/MP:0000550 (11)	MP:0000550	1	8.9	142	1	21.4	142	1	6.6	142	MP:0000550	abnormal forelimb morphology
/fs0/chenr6/Database_fs0/MGI/processing/term.gene/MP:0000552 (7)	MP:0000552	1	12.64	70	1	Inf	70	1	9.91	70	MP:0000552	abnormal radius morphology
/fs0/chenr6/Database_fs0/MGI/processing/term.gene/MP:0000556 (32)	MP:0000556	1	1.98	321	1	4.22	321	1	1.13	321	MP:0000556	abnormal hindlimb morphology
/fs0/chenr6/Database_fs0/MGI/processing/term.gene/MP:0000558 (21)	MP:0000558	1	0.83	200	1	0.87	200	1	0.88	200	MP:0000558	abnormal tibia morphology
/fs0/chenr6/Database_fs0/MGI/processing/term.gene/MP:0000559 (11)	MP:0000559	1	1.88	142	1	3.52	142	1	0.97	142	MP:0000559	abnormal femur morphology
/fs0/chenr6/Database_fs0/MGI/processing/term.gene/MP:0000562 (11)	MP:0000562	1	1.88	114	1	10.55	114	1	0.69	114	MP:0000562	polydactyly
/fs0/chenr6/Database_fs0/MGI/processing/term.gene/MP:0000564 (4)	MP:0000564	1	1.67	76	1	5.25	76	1	0	76	MP:0000564	syndactyly
/fs0/chenr6/Database_fs0/MGI/processing/term.gene/MP:0000572 (28)	MP:0000572	1	1.68	289	1	1.98	289	1	1.9	289	MP:0000572	abnormal autopod morphology
/fs0/chenr6/Database_fs0/MGI/processing/term.gene/MP:0000585 (7)	MP:0000585	1	0.83	101	1	0	101	1	1.22	101	MP:0000585	kinked tail
/fs0/chenr6/Database_fs0/MGI/processing/term.gene/MP:0000592 (3)	MP:0000592	1	2.5	81	1	5.25	81	1	0	81	MP:0000592	short tail
/fs0/chenr6/Database_fs0/MGI/processing/term.gene/MP:0000599 (13)	MP:0000599	1	3.15	161	1	5.31	161	1	1.63	161	MP:0000599	enlarged liver
/fs0/chenr6/Database_fs0/MGI/processing/term.gene/MP:0000600 (5)	MP:0000600	1	3.34	50	1	2.62	50	1	4.88	50	MP:0000600	liver hypoplasia
/fs0/chenr6/Database_fs0/MGI/processing/term.gene/MP:0000601 (22)	MP:0000601	1	2.9	169	1	2.65	169	1	3.1	169	MP:0000601	small liver
/fs0/chenr6/Database_fs0/MGI/processing/term.gene/MP:0000603 (5)	MP:0000603	1	0	68	1	0	68	1	0	68	MP:0000603	pale liver
/fs0/chenr6/Database_fs0/MGI/processing/term.gene/MP:0000607 (9)	MP:0000607	1	4.03	117	1	2.62	117	1	4.93	117	MP:0000607	abnormal hepatocyte morphology
/fs0/chenr6/Database_fs0/MGI/processing/term.gene/MP:0000609 (28)	MP:0000609	1	2.4	280	1	1.44	280	1	3.74	280	MP:0000609	abnormal liver physiology
/fs0/chenr6/Database_fs0/MGI/processing/term.gene/MP:0000613 (7)	MP:0000613	1	6.72	50	1	10.55	50	1	7.39	50	MP:0000613	abnormal salivary gland morphology
/fs0/chenr6/Database_fs0/MGI/processing/term.gene/MP:0000627 (11)	MP:0000627	1	2.87	155	1	5.28	155	1	2.95	155	MP:0000627	abnormal mammary gland morphology
/fs0/chenr6/Database_fs0/MGI/processing/term.gene/MP:0000628 (9)	MP:0000628	1	4.03	109	1	10.55	109	1	3.69	109	MP:0000628	abnormal mammary gland development
/fs0/chenr6/Database_fs0/MGI/processing/term.gene/MP:0000631 (13)	MP:0000631	1	3.15	112	1	5.28	112	1	2.82	112	MP:0000631	abnormal neuroendocrine gland morphology
/fs0/chenr6/Database_fs0/MGI/processing/term.gene/MP:0000633 (11)	MP:0000633	1	2.87	92	1	5.28	92	1	2.46	92	MP:0000633	abnormal pituitary gland morphology
/fs0/chenr6/Database_fs0/MGI/processing/term.gene/MP:0000639 (14)	MP:0000639	1	2.01	104	1	1.31	104	1	1.84	104	MP:0000639	abnormal adrenal gland morphology
/fs0/chenr6/Database_fs0/MGI/processing/term.gene/MP:0000647 (5)	MP:0000647	1	0	59	1	0	59	1	0	59	MP:0000647	abnormal sebaceous gland morphology
/fs0/chenr6/Database_fs0/MGI/processing/term.gene/MP:0000653 (75)	MP:0000653	1	1.37	745	1	1.32	745	1	1.61	745	MP:0000653	abnormal sex gland morphology
/fs0/chenr6/Database_fs0/MGI/processing/term.gene/MP:0000689 (69)	MP:0000689	1	1.96	756	1	1.96	756	1	2.45	756	MP:0000689	abnormal spleen morphology
/fs0/chenr6/Database_fs0/MGI/processing/term.gene/MP:0000691 (31)	MP:0000691	1	2.42	356	1	1.76	356	1	3.18	356	MP:0000691	enlarged spleen
/fs0/chenr6/Database_fs0/MGI/processing/term.gene/MP:0000692 (26)	MP:0000692	1	2.69	224	1	5.38	224	1	2.48	224	MP:0000692	small spleen
/fs0/chenr6/Database_fs0/MGI/processing/term.gene/MP:0000693 (7)	MP:0000693	1	2	75	1	1.31	75	1	4.88	75	MP:0000693	spleen hyperplasia
/fs0/chenr6/Database_fs0/MGI/processing/term.gene/MP:0000694 (13)	MP:0000694	1	3.15	104	1	5.31	104	1	1.96	104	MP:0000694	spleen hypoplasia
/fs0/chenr6/Database_fs0/MGI/processing/term.gene/MP:0000696 (7)	MP:0000696	1	3.77	75	1	1.75	75	1	9.81	75	MP:0000696	abnormal Peyer's patch morphology
/fs0/chenr6/Database_fs0/MGI/processing/term.gene/MP:0000701 (16)	MP:0000701	1	3.03	173	1	3.98	173	1	3.96	173	MP:0000701	abnormal lymph node size
/fs0/chenr6/Database_fs0/MGI/processing/term.gene/MP:0000702 (12)	MP:0000702	1	3.6	127	1	3.52	127	1	4.93	127	MP:0000702	enlarged lymph nodes
/fs0/chenr6/Database_fs0/MGI/processing/term.gene/MP:0000703 (43)	MP:0000703	1	3.06	377	0.625	5.55	377	1	2.35	377	MP:0000703	abnormal thymus morphology
/fs0/chenr6/Database_fs0/MGI/processing/term.gene/MP:0000706 (28)	MP:0000706	1	3.31	234	1	6.36	234	1	2.48	234	MP:0000706	small thymus
/fs0/chenr6/Database_fs0/MGI/processing/term.gene/MP:0000709 (8)	MP:0000709	1	1.67	57	1	2.62	57	1	1.63	57	MP:0000709	enlarged thymus
/fs0/chenr6/Database_fs0/MGI/processing/term.gene/MP:0000715 (10)	MP:0000715	1	5.05	114	1	5.31	114	1	7.39	114	MP:0000715	decreased thymocyte number
/fs0/chenr6/Database_fs0/MGI/processing/term.gene/MP:0000726 (3)	MP:0000726	1	10.02	67	1	5.25	67	1	Inf	67	MP:0000726	absent lymphocyte
/fs0/chenr6/Database_fs0/MGI/processing/term.gene/MP:0000733 (4)	MP:0000733	1	5.01	72	1	Inf	72	1	0	72	MP:0000733	abnormal muscle development
/fs0/chenr6/Database_fs0/MGI/processing/term.gene/MP:0000745 (15)	MP:0000745	1	5.82	234	1	2.11	234	0.171	17.62	234	MP:0000745	tremors
/fs0/chenr6/Database_fs0/MGI/processing/term.gene/MP:0000746 (7)	MP:0000746	1	2	102	1	1.31	102	1	9.81	102	MP:0000746	weakness
/fs0/chenr6/Database_fs0/MGI/processing/term.gene/MP:0000747 (5)	MP:0000747	1	3.34	68	1	2.62	68	1	2.44	68	MP:0000747	muscle weakness
/fs0/chenr6/Database_fs0/MGI/processing/term.gene/MP:0000753 (9)	MP:0000753	1	2.51	98	1	1.05	98	1	9.81	98	MP:0000753	paralysis
/fs0/chenr6/Database_fs0/MGI/processing/term.gene/MP:0000755 (6)	MP:0000755	1	2.5	64	1	1.75	64	1	4.88	64	MP:0000755	hindlimb paralysis
/fs0/chenr6/Database_fs0/MGI/processing/term.gene/MP:0000759 (36)	MP:0000759	1	2.9	323	1	3.8	323	1	2.49	323	MP:0000759	abnormal skeletal muscle morphology
/fs0/chenr6/Database_fs0/MGI/processing/term.gene/MP:0000762 (9)	MP:0000762	1	6.32	77	1	7.97	77	1	7.39	77	MP:0000762	abnormal tongue morphology
/fs0/chenr6/Database_fs0/MGI/processing/term.gene/MP:0000767 (6)	MP:0000767	1	5.02	95	1	7.97	95	1	0	95	MP:0000767	abnormal smooth muscle morphology
/fs0/chenr6/Database_fs0/MGI/processing/term.gene/MP:0000778 (13)	MP:0000778	1	4.34	143	1	2.62	143	1	4.97	143	MP:0000778	abnormal nervous system tract morphology
/fs0/chenr6/Database_fs0/MGI/processing/term.gene/MP:0000780 (11)	MP:0000780	1	6.08	95	1	2.62	95	1	8.3	95	MP:0000780	abnormal corpus callosum morphology
/fs0/chenr6/Database_fs0/MGI/processing/term.gene/MP:0000813 (9)	MP:0000813	1	10.14	68	1	5.25	68	1	12.45	68	MP:0000813	abnormal hippocampus layer morphology
/fs0/chenr6/Database_fs0/MGI/processing/term.gene/MP:0000823 (13)	MP:0000823	1	5.93	116	1	6.73	116	1	4.9	116	MP:0000823	abnormal lateral ventricle morphology
/fs0/chenr6/Database_fs0/MGI/processing/term.gene/MP:0000825 (7)	MP:0000825	1	6.72	51	1	7.97	51	1	4.88	51	MP:0000825	dilated lateral ventricles
/fs0/chenr6/Database_fs0/MGI/processing/term.gene/MP:0000826 (4)	MP:0000826	1	1.67	59	1	2.62	59	1	0	59	MP:0000826	abnormal third ventricle morphology
/fs0/chenr6/Database_fs0/MGI/processing/term.gene/MP:0000830 (19)	MP:0000830	1	2.95	228	1	3.55	228	1	2.82	228	MP:0000830	abnormal diencephalon morphology
/fs0/chenr6/Database_fs0/MGI/processing/term.gene/MP:0000852 (8)	MP:0000852	1	5.04	90	1	3.52	90	1	14.79	90	MP:0000852	small cerebellum
/fs0/chenr6/Database_fs0/MGI/processing/term.gene/MP:0000854 (6)	MP:0000854	1	10.08	88	1	0	88	1	19.82	88	MP:0000854	abnormal cerebellum development
/fs0/chenr6/Database_fs0/MGI/processing/term.gene/MP:0000857 (4)	MP:0000857	1	Inf	55	1	0	55	1	Inf	55	MP:0000857	abnormal cerebellar foliation
/fs0/chenr6/Database_fs0/MGI/processing/term.gene/MP:0000858 (5)	MP:0000858	1	1.25	54	1	0	54	1	2.44	54	MP:0000858	altered metastatic potential
/fs0/chenr6/Database_fs0/MGI/processing/term.gene/MP:0000876 (2)	MP:0000876	1	Inf	56	1	Inf	56	1	Inf	56	MP:0000876	Purkinje cell degeneration
/fs0/chenr6/Database_fs0/MGI/processing/term.gene/MP:0000886 (5)	MP:0000886	1	7.54	73	1	0	73	1	7.39	73	MP:0000886	abnormal cerebellar granule layer morphology
/fs0/chenr6/Database_fs0/MGI/processing/term.gene/MP:0000897 (5)	MP:0000897	1	7.54	112	1	10.55	112	1	4.88	112	MP:0000897	abnormal midbrain morphology
/fs0/chenr6/Database_fs0/MGI/processing/term.gene/MP:0000914 (15)	MP:0000914	1	3.37	187	1	3.18	187	1	3.69	187	MP:0000914	exencephaly
/fs0/chenr6/Database_fs0/MGI/processing/term.gene/MP:0000920 (10)	MP:0000920	1	7.6	129	1	15.94	129	1	6.6	129	MP:0000920	abnormal myelination
/fs0/chenr6/Database_fs0/MGI/processing/term.gene/MP:0000921 (5)	MP:0000921	1	7.54	67	1	10.55	67	1	9.81	67	MP:0000921	demyelination
/fs0/chenr6/Database_fs0/MGI/processing/term.gene/MP:0000928 (8)	MP:0000928	1	8.42	65	1	10.55	65	1	7.39	65	MP:0000928	incomplete rostral neuropore closure
/fs0/chenr6/Database_fs0/MGI/processing/term.gene/MP:0000929 (14)	MP:0000929	1	3.79	171	1	10.7	171	1	1.63	171	MP:0000929	open neural tube
/fs0/chenr6/Database_fs0/MGI/processing/term.gene/MP:0000937 (15)	MP:0000937	1	3.37	133	1	1.75	133	1	4.14	133	MP:0000937	abnormal motor neuron morphology
/fs0/chenr6/Database_fs0/MGI/processing/term.gene/MP:0000947 (3)	MP:0000947	1	Inf	135	1	Inf	135	1	Inf	135	MP:0000947	convulsive seizures
/fs0/chenr6/Database_fs0/MGI/processing/term.gene/MP:0000950 (5)	MP:0000950	1	3.34	119	1	2.62	119	1	2.44	119	MP:0000950	abnormal seizure response to pharmacological agent
/fs0/chenr6/Database_fs0/MGI/processing/term.gene/MP:0000952 (14)	MP:0000952	1	2.8	206	1	10.7	206	1	0.69	206	MP:0000952	abnormal CNS glial cell morphology
/fs0/chenr6/Database_fs0/MGI/processing/term.gene/MP:0000960 (20)	MP:0000960	1	3.39	183	1	3.98	183	1	3.1	183	MP:0000960	abnormal sensory ganglion morphology
/fs0/chenr6/Database_fs0/MGI/processing/term.gene/MP:0000961 (11)	MP:0000961	1	1.88	82	1	2.64	82	1	1.22	82	MP:0000961	abnormal dorsal root ganglion morphology
/fs0/chenr6/Database_fs0/MGI/processing/term.gene/MP:0000965 (28)	MP:0000965	1	3.85	373	1	2.97	373	1	4.48	373	MP:0000965	abnormal sensory neuron morphology
/fs0/chenr6/Database_fs0/MGI/processing/term.gene/MP:0000966 (8)	MP:0000966	1	0.71	136	1	0.87	136	1	0	136	MP:0000966	decreased sensory neuron number
/fs0/chenr6/Database_fs0/MGI/processing/term.gene/MP:0000972 (9)	MP:0000972	1	4.03	184	1	7.97	184	1	1.96	184	MP:0000972	abnormal mechanoreceptor morphology
/fs0/chenr6/Database_fs0/MGI/processing/term.gene/MP:0001004 (11)	MP:0001004	1	1.88	145	1	2.64	145	1	1.22	145	MP:0001004	abnormal retinal photoreceptor morphology
/fs0/chenr6/Database_fs0/MGI/processing/term.gene/MP:0001005 (7)	MP:0001005	1	2	54	1	2.62	54	1	1.63	54	MP:0001005	abnormal retinal rod cell morphology
/fs0/chenr6/Database_fs0/MGI/processing/term.gene/MP:0001051 (8)	MP:0001051	1	8.42	70	1	5.28	70	1	14.79	70	MP:0001051	abnormal somatic motor system morphology
/fs0/chenr6/Database_fs0/MGI/processing/term.gene/MP:0001053 (8)	MP:0001053	1	8.42	67	1	5.28	67	1	14.79	67	MP:0001053	abnormal neuromuscular synapse morphology
/fs0/chenr6/Database_fs0/MGI/processing/term.gene/MP:0001056 (23)	MP:0001056	1	3.93	172	1	5.38	172	1	3.74	172	MP:0001056	abnormal cranial nerve morphology
/fs0/chenr6/Database_fs0/MGI/processing/term.gene/MP:0001077 (8)	MP:0001077	1	1.67	89	1	1.31	89	1	2.44	89	MP:0001077	abnormal spinal nerve morphology
/fs0/chenr6/Database_fs0/MGI/processing/term.gene/MP:0001081 (17)	MP:0001081	1	3.55	154	1	Inf	154	1	1.97	154	MP:0001081	abnormal cranial ganglia morphology
/fs0/chenr6/Database_fs0/MGI/processing/term.gene/MP:0001116 (49)	MP:0001116	1	1.29	443	1	1.24	443	1	1.48	443	MP:0001116	small gonad
/fs0/chenr6/Database_fs0/MGI/processing/term.gene/MP:0001117 (16)	MP:0001117	1	1.15	160	1	0	160	1	1.84	160	MP:0001117	absent gametes
/fs0/chenr6/Database_fs0/MGI/processing/term.gene/MP:0001119 (36)	MP:0001119	1	2.24	360	1	1.31	360	1	2.83	360	MP:0001119	abnormal female reproductive system morphology
/fs0/chenr6/Database_fs0/MGI/processing/term.gene/MP:0001120 (18)	MP:0001120	1	2.52	154	1	0	154	1	4.28	154	MP:0001120	abnormal uterus morphology
/fs0/chenr6/Database_fs0/MGI/processing/term.gene/MP:0001124 (42)	MP:0001124	1	1	411	1	0.37	411	1	1.4	411	MP:0001124	abnormal gametes
/fs0/chenr6/Database_fs0/MGI/processing/term.gene/MP:0001125 (9)	MP:0001125	1	2.51	91	1	0	91	1	2.95	91	MP:0001125	abnormal oocyte morphology
/fs0/chenr6/Database_fs0/MGI/processing/term.gene/MP:0001126 (26)	MP:0001126	1	1.51	252	1	0.75	252	1	1.9	252	MP:0001126	abnormal ovary morphology
/fs0/chenr6/Database_fs0/MGI/processing/term.gene/MP:0001127 (13)	MP:0001127	1	0.91	115	1	0	115	1	1.63	115	MP:0001127	small ovary
/fs0/chenr6/Database_fs0/MGI/processing/term.gene/MP:0001130 (11)	MP:0001130	1	2.87	86	1	0	86	1	3.96	86	MP:0001130	abnormal ovarian folliculogenesis
/fs0/chenr6/Database_fs0/MGI/processing/term.gene/MP:0001131 (20)	MP:0001131	1	2.16	167	1	1.31	167	1	2.75	167	MP:0001131	abnormal ovarian follicle morphology
/fs0/chenr6/Database_fs0/MGI/processing/term.gene/MP:0001134 (10)	MP:0001134	1	1.25	51	1	0	51	1	1.63	51	MP:0001134	absent corpus luteum
/fs0/chenr6/Database_fs0/MGI/processing/term.gene/MP:0001145 (73)	MP:0001145	1	1.31	674	1	1.71	674	1	1.27	674	MP:0001145	abnormal male reproductive system morphology
/fs0/chenr6/Database_fs0/MGI/processing/term.gene/MP:0001146 (56)	MP:0001146	1	1.23	534	1	1.1	534	1	1.38	534	MP:0001146	abnormal testis morphology
/fs0/chenr6/Database_fs0/MGI/processing/term.gene/MP:0001147 (44)	MP:0001147	1	1.29	401	1	1.05	401	1	1.56	401	MP:0001147	small testis
/fs0/chenr6/Database_fs0/MGI/processing/term.gene/MP:0001148 (8)	MP:0001148	1	1.67	65	1	0	65	1	4.9	65	MP:0001148	enlarged testis
/fs0/chenr6/Database_fs0/MGI/processing/term.gene/MP:0001153 (6)	MP:0001153	1	1	69	1	0	69	1	0.97	69	MP:0001153	small seminiferous tubules
/fs0/chenr6/Database_fs0/MGI/processing/term.gene/MP:0001154 (5)	MP:0001154	1	1.25	72	1	2.62	72	1	0	72	MP:0001154	seminiferous tubule degeneration
/fs0/chenr6/Database_fs0/MGI/processing/term.gene/MP:0001155 (17)	MP:0001155	1	0.31	164	1	0	164	1	0.61	164	MP:0001155	arrest of spermatogenesis
/fs0/chenr6/Database_fs0/MGI/processing/term.gene/MP:0001156 (55)	MP:0001156	1	1.11	508	1	0.82	508	1	1.32	508	MP:0001156	abnormal spermatogenesis
/fs0/chenr6/Database_fs0/MGI/processing/term.gene/MP:0001158 (5)	MP:0001158	1	1.25	52	1	1.75	52	1	4.88	52	MP:0001158	abnormal prostate gland morphology
/fs0/chenr6/Database_fs0/MGI/processing/term.gene/MP:0001176 (12)	MP:0001176	1	3.6	116	1	5.28	116	1	4.95	116	MP:0001176	abnormal lung development
/fs0/chenr6/Database_fs0/MGI/processing/term.gene/MP:0001177 (12)	MP:0001177	1	1.67	87	1	1.05	87	1	2.45	87	MP:0001177	atelectasis
/fs0/chenr6/Database_fs0/MGI/processing/term.gene/MP:0001186 (32)	MP:0001186	1	3.52	392	1	4.48	392	1	2.86	392	MP:0001186	pigmentation phenotype
/fs0/chenr6/Database_fs0/MGI/processing/term.gene/MP:0001191 (18)	MP:0001191	1	5.11	167	1	4.27	167	1	10.01	167	MP:0001191	abnormal skin condition
/fs0/chenr6/Database_fs0/MGI/processing/term.gene/MP:0001194 (3)	MP:0001194	1	Inf	60	1	Inf	60	1	Inf	60	MP:0001194	dermatitis
/fs0/chenr6/Database_fs0/MGI/processing/term.gene/MP:0001216 (17)	MP:0001216	1	2.75	206	1	2.65	206	1	3.96	206	MP:0001216	abnormal epidermal layer morphology
/fs0/chenr6/Database_fs0/MGI/processing/term.gene/MP:0001219 (6)	MP:0001219	1	0	62	1	0	62	1	0	62	MP:0001219	thick epidermis
/fs0/chenr6/Database_fs0/MGI/processing/term.gene/MP:0001222 (0)	MP:0001222	1	0	54	1	0	54	1	0	54	MP:0001222	epidermal hyperplasia
/fs0/chenr6/Database_fs0/MGI/processing/term.gene/MP:0001240 (7)	MP:0001240	1	2	99	1	1.31	99	1	4.88	99	MP:0001240	abnormal epidermis stratum corneum morphology
/fs0/chenr6/Database_fs0/MGI/processing/term.gene/MP:0001242 (4)	MP:0001242	1	5.01	67	1	5.25	67	1	4.88	67	MP:0001242	hyperkeratosis
/fs0/chenr6/Database_fs0/MGI/processing/term.gene/MP:0001243 (7)	MP:0001243	1	3.77	89	1	1.75	89	1	9.81	89	MP:0001243	abnormal dermal layer morphology
/fs0/chenr6/Database_fs0/MGI/processing/term.gene/MP:0001256 (25)	MP:0001256	1	1.96	314	1	2.36	314	1	1.84	314	MP:0001256	abnormal body length
/fs0/chenr6/Database_fs0/MGI/processing/term.gene/MP:0001258 (21)	MP:0001258	1	2.53	274	1	3.55	274	1	2.1	274	MP:0001258	decreased body length
/fs0/chenr6/Database_fs0/MGI/processing/term.gene/MP:0001260 (23)	MP:0001260	1	1.78	251	1	2.66	251	1	0.97	251	MP:0001260	increased body weight
/fs0/chenr6/Database_fs0/MGI/processing/term.gene/MP:0001261 (7)	MP:0001261	1	2	74	1	10.55	74	1	0	74	MP:0001261	obese
/fs0/chenr6/Database_fs0/MGI/processing/term.gene/MP:0001263 (26)	MP:0001263	1	2.25	254	0.768	9.56	254	1	0.37	254	MP:0001263	weight loss
/fs0/chenr6/Database_fs0/MGI/processing/term.gene/MP:0001264 (26)	MP:0001264	1	2.25	277	1	2.36	277	1	1.97	277	MP:0001264	increased body size
/fs0/chenr6/Database_fs0/MGI/processing/term.gene/MP:0001270 (4)	MP:0001270	1	15.08	62	1	Inf	62	1	9.81	62	MP:0001270	distended abdomen
/fs0/chenr6/Database_fs0/MGI/processing/term.gene/MP:0001286 (13)	MP:0001286	1	3.15	208	1	7.97	208	1	1.63	208	MP:0001286	abnormal eye development
/fs0/chenr6/Database_fs0/MGI/processing/term.gene/MP:0001293 (7)	MP:0001293	1	2	89	1	0	89	1	4.9	89	MP:0001293	anophthalmia
/fs0/chenr6/Database_fs0/MGI/processing/term.gene/MP:0001297 (18)	MP:0001297	1	2.52	154	1	4.48	154	1	1.4	154	MP:0001297	microphthalmia
/fs0/chenr6/Database_fs0/MGI/processing/term.gene/MP:0001299 (1)	MP:0001299	1	0	54	1	0	54	1	0	54	MP:0001299	abnormal eye distance/ position
/fs0/chenr6/Database_fs0/MGI/processing/term.gene/MP:0001302 (6)	MP:0001302	1	10.08	51	1	15.94	51	1	9.81	51	MP:0001302	eyelids open at birth
/fs0/chenr6/Database_fs0/MGI/processing/term.gene/MP:0001303 (21)	MP:0001303	1	0.83	229	1	0.52	229	1	1.84	229	MP:0001303	abnormal lens morphology
/fs0/chenr6/Database_fs0/MGI/processing/term.gene/MP:0001304 (12)	MP:0001304	1	0.45	123	1	0	123	1	0.69	123	MP:0001304	cataract
/fs0/chenr6/Database_fs0/MGI/processing/term.gene/MP:0001312 (17)	MP:0001312	1	1.54	154	1	1.5	154	1	2.46	154	MP:0001312	abnormal cornea morphology
/fs0/chenr6/Database_fs0/MGI/processing/term.gene/MP:0001314 (6)	MP:0001314	1	2.5	68	1	1.75	68	1	9.81	68	MP:0001314	corneal opacity
/fs0/chenr6/Database_fs0/MGI/processing/term.gene/MP:0001322 (7)	MP:0001322	1	2	96	1	5.25	96	1	0.97	96	MP:0001322	abnormal iris morphology
/fs0/chenr6/Database_fs0/MGI/processing/term.gene/MP:0001324 (20)	MP:0001324	1	4.17	182	1	5.34	182	1	3.1	182	MP:0001324	abnormal eye pigmentation
/fs0/chenr6/Database_fs0/MGI/processing/term.gene/MP:0001325 (47)	MP:0001325	1	2.93	564	1	2.71	564	1	3.02	564	MP:0001325	abnormal retina morphology
/fs0/chenr6/Database_fs0/MGI/processing/term.gene/MP:0001326 (7)	MP:0001326	1	2	93	1	0	93	1	3.27	93	MP:0001326	retinal degeneration
/fs0/chenr6/Database_fs0/MGI/processing/term.gene/MP:0001330 (6)	MP:0001330	1	5.02	84	1	2.62	84	1	14.79	84	MP:0001330	abnormal optic nerve morphology
/fs0/chenr6/Database_fs0/MGI/processing/term.gene/MP:0001360 (8)	MP:0001360	1	8.42	89	1	15.94	89	1	7.39	89	MP:0001360	abnormal social investigation
/fs0/chenr6/Database_fs0/MGI/processing/term.gene/MP:0001363 (13)	MP:0001363	1	4.34	164	0.9	26.95	164	1	1.22	164	MP:0001363	increased anxiety-related response
/fs0/chenr6/Database_fs0/MGI/processing/term.gene/MP:0001364 (11)	MP:0001364	1	4.21	126	1	3.18	126	1	7.39	126	MP:0001364	decreased anxiety-related response
/fs0/chenr6/Database_fs0/MGI/processing/term.gene/MP:0001388 (16)	MP:0001388	1	3.03	179	1	8.98	179	1	0.69	179	MP:0001388	abnormal stationary movement
/fs0/chenr6/Database_fs0/MGI/processing/term.gene/MP:0001391 (6)	MP:0001391	1	1	54	1	2.62	54	1	0	54	MP:0001391	abnormal tail movements
/fs0/chenr6/Database_fs0/MGI/processing/term.gene/MP:0001393 (15)	MP:0001393	1	5.82	204	1	13.47	204	1	3.96	204	MP:0001393	ataxia
/fs0/chenr6/Database_fs0/MGI/processing/term.gene/MP:0001394 (7)	MP:0001394	1	2	94	1	5.25	94	1	1.22	94	MP:0001394	circling
/fs0/chenr6/Database_fs0/MGI/processing/term.gene/MP:0001402 (29)	MP:0001402	1	2.28	377	1	2.36	377	1	2.06	377	MP:0001402	hypoactivity
/fs0/chenr6/Database_fs0/MGI/processing/term.gene/MP:0001406 (22)	MP:0001406	1	2.9	325	1	1.98	325	1	4.99	325	MP:0001406	abnormal gait
/fs0/chenr6/Database_fs0/MGI/processing/term.gene/MP:0001407 (2)	MP:0001407	1	Inf	51	1	Inf	51	1	Inf	51	MP:0001407	short stride length
/fs0/chenr6/Database_fs0/MGI/processing/term.gene/MP:0001408 (10)	MP:0001408	1	3.35	156	1	10.55	156	1	1.96	156	MP:0001408	stereotypic behavior
/fs0/chenr6/Database_fs0/MGI/processing/term.gene/MP:0001413 (15)	MP:0001413	1	4.44	185	1	21.4	185	1	2.47	185	MP:0001413	abnormal response to new environment
/fs0/chenr6/Database_fs0/MGI/processing/term.gene/MP:0001415 (11)	MP:0001415	1	4.21	73	1	10.55	73	1	3.29	73	MP:0001415	increased exploration in new environment
/fs0/chenr6/Database_fs0/MGI/processing/term.gene/MP:0001417 (4)	MP:0001417	1	5.01	85	1	Inf	85	1	0	85	MP:0001417	decreased exploration in new environment
/fs0/chenr6/Database_fs0/MGI/processing/term.gene/MP:0001422 (12)	MP:0001422	1	1	126	1	1.05	126	1	0.97	126	MP:0001422	abnormal drinking behavior
/fs0/chenr6/Database_fs0/MGI/processing/term.gene/MP:0001429 (5)	MP:0001429	1	1.25	72	1	0	72	1	4.88	72	MP:0001429	dehydration
/fs0/chenr6/Database_fs0/MGI/processing/term.gene/MP:0001431 (42)	MP:0001431	1	1.58	446	1	1.47	446	1	1.9	446	MP:0001431	abnormal eating behavior
/fs0/chenr6/Database_fs0/MGI/processing/term.gene/MP:0001433 (6)	MP:0001433	1	0	53	1	0	53	1	0	53	MP:0001433	polyphagia
/fs0/chenr6/Database_fs0/MGI/processing/term.gene/MP:0001436 (12)	MP:0001436	1	3.6	95	1	1.31	95	1	9.91	95	MP:0001436	abnormal suckling behavior
/fs0/chenr6/Database_fs0/MGI/processing/term.gene/MP:0001438 (6)	MP:0001438	1	2.5	104	1	5.25	104	1	1.63	104	MP:0001438	aphagia
/fs0/chenr6/Database_fs0/MGI/processing/term.gene/MP:0001440 (4)	MP:0001440	1	5.01	87	1	Inf	87	1	2.44	87	MP:0001440	abnormal grooming behavior
/fs0/chenr6/Database_fs0/MGI/processing/term.gene/MP:0001454 (9)	MP:0001454	1	6.32	88	1	10.7	88	1	2.44	88	MP:0001454	abnormal cued conditioning behavior
/fs0/chenr6/Database_fs0/MGI/processing/term.gene/MP:0001458 (2)	MP:0001458	1	Inf	60	1	Inf	60	1	0	60	MP:0001458	abnormal object recognition memory
/fs0/chenr6/Database_fs0/MGI/processing/term.gene/MP:0001462 (5)	MP:0001462	1	3.34	72	1	0	72	1	9.81	72	MP:0001462	abnormal avoidance learning behavior
/fs0/chenr6/Database_fs0/MGI/processing/term.gene/MP:0001468 (9)	MP:0001468	1	10.14	139	1	8.98	139	1	4.88	139	MP:0001468	abnormal temporal memory
/fs0/chenr6/Database_fs0/MGI/processing/term.gene/MP:0001469 (9)	MP:0001469	1	10.14	117	1	8.98	117	1	4.88	117	MP:0001469	abnormal contextual conditioning behavior
/fs0/chenr6/Database_fs0/MGI/processing/term.gene/MP:0001485 (2)	MP:0001485	1	0	63	1	0	63	1	0	63	MP:0001485	abnormal pinna reflex
/fs0/chenr6/Database_fs0/MGI/processing/term.gene/MP:0001486 (17)	MP:0001486	1	5.75	236	1	2.65	236	1	10.01	236	MP:0001486	abnormal startle reflex
/fs0/chenr6/Database_fs0/MGI/processing/term.gene/MP:0001488 (9)	MP:0001488	1	4.03	89	1	2.64	89	1	9.81	89	MP:0001488	increased startle reflex
/fs0/chenr6/Database_fs0/MGI/processing/term.gene/MP:0001489 (6)	MP:0001489	1	10.08	114	1	2.62	114	1	14.79	114	MP:0001489	decreased startle reflex
/fs0/chenr6/Database_fs0/MGI/processing/term.gene/MP:0001501 (4)	MP:0001501	1	1.67	53	1	2.62	53	1	0	53	MP:0001501	abnormal sleep pattern
/fs0/chenr6/Database_fs0/MGI/processing/term.gene/MP:0001502 (6)	MP:0001502	1	2.5	82	1	1.75	82	1	4.88	82	MP:0001502	obsolete abnormal circadian rhythm
/fs0/chenr6/Database_fs0/MGI/processing/term.gene/MP:0001504 (15)	MP:0001504	1	4.44	199	1	3.98	199	1	4.95	199	MP:0001504	abnormal posture
/fs0/chenr6/Database_fs0/MGI/processing/term.gene/MP:0001505 (6)	MP:0001505	1	5.02	80	1	5.28	80	1	4.88	80	MP:0001505	hunched posture
/fs0/chenr6/Database_fs0/MGI/processing/term.gene/MP:0001513 (15)	MP:0001513	1	3.37	182	1	3.18	182	1	6.6	182	MP:0001513	limb grasping
/fs0/chenr6/Database_fs0/MGI/processing/term.gene/MP:0001515 (31)	MP:0001515	1	1.2	310	1	1.51	310	1	1.22	310	MP:0001515	abnormal grip strength
/fs0/chenr6/Database_fs0/MGI/processing/term.gene/MP:0001522 (5)	MP:0001522	1	3.34	68	1	Inf	68	1	1.63	68	MP:0001522	impaired swimming
/fs0/chenr6/Database_fs0/MGI/processing/term.gene/MP:0001523 (8)	MP:0001523	1	8.42	96	1	15.94	96	1	4.9	96	MP:0001523	impaired righting response
/fs0/chenr6/Database_fs0/MGI/processing/term.gene/MP:0001524 (2)	MP:0001524	1	5	51	1	0	51	1	4.88	51	MP:0001524	impaired limb coordination
/fs0/chenr6/Database_fs0/MGI/processing/term.gene/MP:0001525 (7)	MP:0001525	1	6.72	103	1	7.97	103	1	9.81	103	MP:0001525	impaired balance
/fs0/chenr6/Database_fs0/MGI/processing/term.gene/MP:0001529 (5)	MP:0001529	1	3.34	56	1	5.25	56	1	2.44	56	MP:0001529	abnormal vocalization
/fs0/chenr6/Database_fs0/MGI/processing/term.gene/MP:0001539 (5)	MP:0001539	1	1.25	63	1	1.75	63	1	0	63	MP:0001539	decreased caudal vertebrae number
/fs0/chenr6/Database_fs0/MGI/processing/term.gene/MP:0001541 (5)	MP:0001541	1	3.34	66	1	2.62	66	1	4.88	66	MP:0001541	abnormal osteoclast physiology
/fs0/chenr6/Database_fs0/MGI/processing/term.gene/MP:0001542 (5)	MP:0001542	1	3.34	57	1	2.62	57	1	4.88	57	MP:0001542	abnormal bone strength
/fs0/chenr6/Database_fs0/MGI/processing/term.gene/MP:0001547 (86)	MP:0001547	1	1.66	925	1	2.04	925	1	1.5	925	MP:0001547	abnormal lipid level
/fs0/chenr6/Database_fs0/MGI/processing/term.gene/MP:0001552 (10)	MP:0001552	1	2.15	140	1	5.28	140	1	0.97	140	MP:0001552	increased circulating triglyceride level
/fs0/chenr6/Database_fs0/MGI/processing/term.gene/MP:0001553 (13)	MP:0001553	1	0.91	158	1	1.31	158	1	0.69	158	MP:0001553	abnormal circulating free fatty acids level
/fs0/chenr6/Database_fs0/MGI/processing/term.gene/MP:0001554 (3)	MP:0001554	1	2.5	70	1	5.25	70	1	0	70	MP:0001554	increased circulating free fatty acid level
/fs0/chenr6/Database_fs0/MGI/processing/term.gene/MP:0001556 (15)	MP:0001556	1	2.52	99	1	3.04	99	1	2.45	99	MP:0001556	increased circulating HDL cholesterol level
/fs0/chenr6/Database_fs0/MGI/processing/term.gene/MP:0001559 (9)	MP:0001559	1	2.51	88	1	5.31	88	1	0	88	MP:0001559	hyperglycemia
/fs0/chenr6/Database_fs0/MGI/processing/term.gene/MP:0001560 (42)	MP:0001560	1	2.04	399	1	2.55	399	1	1.4	399	MP:0001560	abnormal circulating insulin level
/fs0/chenr6/Database_fs0/MGI/processing/term.gene/MP:0001562 (5)	MP:0001562	1	1.25	116	1	0	116	1	1.22	116	MP:0001562	abnormal circulating calcium level
/fs0/chenr6/Database_fs0/MGI/processing/term.gene/MP:0001565 (5)	MP:0001565	1	1.25	75	1	2.62	75	1	0	75	MP:0001565	abnormal circulating phosphate level
/fs0/chenr6/Database_fs0/MGI/processing/term.gene/MP:0001569 (2)	MP:0001569	1	0	69	1	0	69	1	0	69	MP:0001569	abnormal circulating bilirubin level
/fs0/chenr6/Database_fs0/MGI/processing/term.gene/MP:0001570 (33)	MP:0001570	1	1.61	445	1	0.87	445	1	1.85	445	MP:0001570	abnormal circulating enzyme level
/fs0/chenr6/Database_fs0/MGI/processing/term.gene/MP:0001573 (14)	MP:0001573	1	2.01	156	1	1.75	156	1	1.63	156	MP:0001573	abnormal circulating alanine transaminase level
/fs0/chenr6/Database_fs0/MGI/processing/term.gene/MP:0001575 (25)	MP:0001575	1	4.03	193	1	6.36	193	1	2.47	193	MP:0001575	cyanosis
/fs0/chenr6/Database_fs0/MGI/processing/term.gene/MP:0001577 (27)	MP:0001577	1	4.11	252	1	3.35	252	1	5.77	252	MP:0001577	anemia
/fs0/chenr6/Database_fs0/MGI/processing/term.gene/MP:0001586 (18)	MP:0001586	1	1.93	223	1	1.5	223	1	2.95	223	MP:0001586	abnormal erythrocyte cell number
/fs0/chenr6/Database_fs0/MGI/processing/term.gene/MP:0001588 (26)	MP:0001588	1	2.25	356	1	1.98	356	1	3.32	356	MP:0001588	abnormal hemoglobin
/fs0/chenr6/Database_fs0/MGI/processing/term.gene/MP:0001589 (14)	MP:0001589	1	2.8	169	1	0	169	1	6.22	169	MP:0001589	abnormal mean corpuscular hemoglobin
/fs0/chenr6/Database_fs0/MGI/processing/term.gene/MP:0001601 (7)	MP:0001601	1	12.64	102	1	Inf	102	1	7.39	102	MP:0001601	abnormal myelopoiesis
/fs0/chenr6/Database_fs0/MGI/processing/term.gene/MP:0001606 (6)	MP:0001606	1	1	50	1	0	50	1	4.88	50	MP:0001606	impaired hematopoiesis
/fs0/chenr6/Database_fs0/MGI/processing/term.gene/MP:0001613 (5)	MP:0001613	1	20.16	64	1	Inf	64	1	9.81	64	MP:0001613	abnormal vasodilation
/fs0/chenr6/Database_fs0/MGI/processing/term.gene/MP:0001619 (5)	MP:0001619	1	7.54	52	1	0	52	1	14.79	52	MP:0001619	abnormal vascular permeability
/fs0/chenr6/Database_fs0/MGI/processing/term.gene/MP:0001625 (13)	MP:0001625	1	3.15	147	1	3.98	147	1	1.63	147	MP:0001625	cardiac hypertrophy
/fs0/chenr6/Database_fs0/MGI/processing/term.gene/MP:0001629 (15)	MP:0001629	1	2.52	182	1	8.98	182	1	0	182	MP:0001629	abnormal heart rate
/fs0/chenr6/Database_fs0/MGI/processing/term.gene/MP:0001654 (9)	MP:0001654	1	0.62	64	1	0	64	1	0.97	64	MP:0001654	hepatic necrosis
/fs0/chenr6/Database_fs0/MGI/processing/term.gene/MP:0001663 (32)	MP:0001663	1	2.31	461	1	1.93	461	1	2.99	461	MP:0001663	abnormal digestive system physiology
/fs0/chenr6/Database_fs0/MGI/processing/term.gene/MP:0001664 (4)	MP:0001664	1	5.01	90	1	Inf	90	1	2.44	90	MP:0001664	abnormal digestion
/fs0/chenr6/Database_fs0/MGI/processing/term.gene/MP:0001674 (8)	MP:0001674	1	0.71	120	1	0	120	1	1.22	120	MP:0001674	abnormal germ layer development
/fs0/chenr6/Database_fs0/MGI/processing/term.gene/MP:0001680 (7)	MP:0001680	1	0.83	62	1	0	62	1	1.63	62	MP:0001680	abnormal mesoderm development
/fs0/chenr6/Database_fs0/MGI/processing/term.gene/MP:0001683 (3)	MP:0001683	1	10.02	60	1	5.25	60	1	4.88	60	MP:0001683	absent mesoderm
/fs0/chenr6/Database_fs0/MGI/processing/term.gene/MP:0001688 (13)	MP:0001688	1	4.34	170	1	5.34	170	1	2.45	170	MP:0001688	abnormal somite development
/fs0/chenr6/Database_fs0/MGI/processing/term.gene/MP:0001700 (13)	MP:0001700	1	5.93	159	1	21.4	159	1	2.95	159	MP:0001700	abnormal embryo turning
/fs0/chenr6/Database_fs0/MGI/processing/term.gene/MP:0001701 (5)	MP:0001701	1	7.54	60	1	Inf	60	1	2.44	60	MP:0001701	incomplete embryo turning
/fs0/chenr6/Database_fs0/MGI/processing/term.gene/MP:0001706 (3)	MP:0001706	1	0	53	1	0	53	1	0	53	MP:0001706	abnormal left-right axis patterning
/fs0/chenr6/Database_fs0/MGI/processing/term.gene/MP:0001712 (5)	MP:0001712	1	7.54	116	1	5.25	116	1	9.81	116	MP:0001712	abnormal placenta development
/fs0/chenr6/Database_fs0/MGI/processing/term.gene/MP:0001716 (11)	MP:0001716	1	8.9	142	1	5.31	142	1	19.82	142	MP:0001716	abnormal placenta labyrinth morphology
/fs0/chenr6/Database_fs0/MGI/processing/term.gene/MP:0001718 (13)	MP:0001718	1	3.15	174	1	1.75	174	1	7.39	174	MP:0001718	abnormal visceral yolk sac morphology
/fs0/chenr6/Database_fs0/MGI/processing/term.gene/MP:0001719 (4)	MP:0001719	1	1.67	60	1	2.62	60	1	0	60	MP:0001719	absent vitelline blood vessels
/fs0/chenr6/Database_fs0/MGI/processing/term.gene/MP:0001722 (7)	MP:0001722	1	6.72	82	1	5.28	82	1	9.81	82	MP:0001722	pale yolk sac
/fs0/chenr6/Database_fs0/MGI/processing/term.gene/MP:0001726 (5)	MP:0001726	1	1.25	74	1	0	74	1	1.63	74	MP:0001726	abnormal allantois morphology
/fs0/chenr6/Database_fs0/MGI/processing/term.gene/MP:0001727 (3)	MP:0001727	1	2.5	52	1	2.62	52	1	0	52	MP:0001727	abnormal embryo implantation
/fs0/chenr6/Database_fs0/MGI/processing/term.gene/MP:0001730 (18)	MP:0001730	1	1.93	242	1	1.98	242	1	1.63	242	MP:0001730	embryonic growth arrest
/fs0/chenr6/Database_fs0/MGI/processing/term.gene/MP:0001756 (14)	MP:0001756	1	1.36	122	1	0	122	1	3.69	122	MP:0001756	abnormal urination
/fs0/chenr6/Database_fs0/MGI/processing/term.gene/MP:0001762 (10)	MP:0001762	1	1.25	75	1	0	75	1	2.45	75	MP:0001762	polyuria
/fs0/chenr6/Database_fs0/MGI/processing/term.gene/MP:0001765 (43)	MP:0001765	1	2.76	537	1	3.59	537	1	2.52	537	MP:0001765	abnormal ion homeostasis
/fs0/chenr6/Database_fs0/MGI/processing/term.gene/MP:0001770 (5)	MP:0001770	1	7.54	106	1	Inf	106	1	4.9	106	MP:0001770	abnormal iron level
/fs0/chenr6/Database_fs0/MGI/processing/term.gene/MP:0001776 (7)	MP:0001776	1	0.83	102	1	0	102	1	1.22	102	MP:0001776	abnormal circulating sodium level
/fs0/chenr6/Database_fs0/MGI/processing/term.gene/MP:0001778 (7)	MP:0001778	1	3.77	65	1	5.25	65	1	3.27	65	MP:0001778	abnormal brown adipose tissue amount
/fs0/chenr6/Database_fs0/MGI/processing/term.gene/MP:0001781 (20)	MP:0001781	1	2.16	189	1	0.58	189	1	4.97	189	MP:0001781	abnormal white adipose tissue amount
/fs0/chenr6/Database_fs0/MGI/processing/term.gene/MP:0001783 (8)	MP:0001783	1	5.04	68	1	0	68	1	19.82	68	MP:0001783	decreased white adipose tissue amount
/fs0/chenr6/Database_fs0/MGI/processing/term.gene/MP:0001787 (9)	MP:0001787	1	4.03	71	1	5.28	71	1	3.27	71	MP:0001787	pericardial edema
/fs0/chenr6/Database_fs0/MGI/processing/term.gene/MP:0001793 (35)	MP:0001793	1	3.44	448	1	1.63	448	0.184	6.26	448	MP:0001793	altered susceptibility to infection
/fs0/chenr6/Database_fs0/MGI/processing/term.gene/MP:0001805 (19)	MP:0001805	1	4.59	206	1	5.38	206	1	3.96	206	MP:0001805	decreased IgG level
/fs0/chenr6/Database_fs0/MGI/processing/term.gene/MP:0001806 (9)	MP:0001806	1	4.03	94	1	7.97	94	1	1.63	94	MP:0001806	decreased IgM level
/fs0/chenr6/Database_fs0/MGI/processing/term.gene/MP:0001807 (6)	MP:0001807	1	2.5	50	1	1.75	50	1	4.88	50	MP:0001807	decreased IgA level
/fs0/chenr6/Database_fs0/MGI/processing/term.gene/MP:0001823 (13)	MP:0001823	1	1.5	137	1	2.11	137	1	0.97	137	MP:0001823	thymus hypoplasia
/fs0/chenr6/Database_fs0/MGI/processing/term.gene/MP:0001828 (27)	MP:0001828	1	2.13	274	1	1.31	274	1	4.28	274	MP:0001828	abnormal T cell activation
/fs0/chenr6/Database_fs0/MGI/processing/term.gene/MP:0001835 (4)	MP:0001835	1	1.67	63	1	5.25	63	1	2.44	63	MP:0001835	abnormal antigen presentation
/fs0/chenr6/Database_fs0/MGI/processing/term.gene/MP:0001844 (28)	MP:0001844	1	2.83	306	1	1.98	306	1	3.66	306	MP:0001844	autoimmune response
/fs0/chenr6/Database_fs0/MGI/processing/term.gene/MP:0001851 (7)	MP:0001851	1	6.72	61	1	10.55	61	1	4.9	61	MP:0001851	eye inflammation
/fs0/chenr6/Database_fs0/MGI/processing/term.gene/MP:0001858 (7)	MP:0001858	1	0.83	144	1	0.87	144	1	0	144	MP:0001858	intestinal inflammation
/fs0/chenr6/Database_fs0/MGI/processing/term.gene/MP:0001859 (21)	MP:0001859	1	2.02	141	1	1.05	141	1	2.47	141	MP:0001859	kidney inflammation
/fs0/chenr6/Database_fs0/MGI/processing/term.gene/MP:0001860 (13)	MP:0001860	1	2.23	114	1	2.11	114	1	2.45	114	MP:0001860	liver inflammation
/fs0/chenr6/Database_fs0/MGI/processing/term.gene/MP:0001861 (10)	MP:0001861	1	5.05	135	1	5.31	135	1	4.9	135	MP:0001861	lung inflammation
/fs0/chenr6/Database_fs0/MGI/processing/term.gene/MP:0001869 (2)	MP:0001869	1	5	50	1	5.25	50	1	0	50	MP:0001869	pancreas inflammation
/fs0/chenr6/Database_fs0/MGI/processing/term.gene/MP:0001881 (3)	MP:0001881	1	2.5	74	1	0	74	1	4.88	74	MP:0001881	abnormal mammary gland physiology
/fs0/chenr6/Database_fs0/MGI/processing/term.gene/MP:0001882 (2)	MP:0001882	1	5	62	1	0	62	1	4.88	62	MP:0001882	abnormal lactation
/fs0/chenr6/Database_fs0/MGI/processing/term.gene/MP:0001891 (15)	MP:0001891	1	2.52	128	1	2.65	128	1	3.27	128	MP:0001891	hydrocephaly
/fs0/chenr6/Database_fs0/MGI/processing/term.gene/MP:0001905 (3)	MP:0001905	1	10.02	75	1	0	75	1	9.81	75	MP:0001905	abnormal dopamine level
/fs0/chenr6/Database_fs0/MGI/processing/term.gene/MP:0001915 (10)	MP:0001915	1	5.05	84	1	3.98	84	1	9.81	84	MP:0001915	intracranial hemorrhage
/fs0/chenr6/Database_fs0/MGI/processing/term.gene/MP:0001919 (114)	MP:0001919	1	1.69	1322	1	1.33	1322	1	2.02	1322	MP:0001919	abnormal reproductive system physiology
/fs0/chenr6/Database_fs0/MGI/processing/term.gene/MP:0001921 (37)	MP:0001921	1	2.15	494	1	1.9	494	1	2.48	494	MP:0001921	reduced fertility
/fs0/chenr6/Database_fs0/MGI/processing/term.gene/MP:0001922 (18)	MP:0001922	1	1	217	1	0.75	217	1	1.22	217	MP:0001922	reduced male fertility
/fs0/chenr6/Database_fs0/MGI/processing/term.gene/MP:0001923 (15)	MP:0001923	1	2.52	225	1	1.05	225	1	3.96	225	MP:0001923	reduced female fertility
/fs0/chenr6/Database_fs0/MGI/processing/term.gene/MP:0001924 (61)	MP:0001924	1	1.82	686	1	0.92	686	1	2.27	686	MP:0001924	infertility
/fs0/chenr6/Database_fs0/MGI/processing/term.gene/MP:0001925 (51)	MP:0001925	1	1.56	498	1	0.74	498	1	2	498	MP:0001925	male infertility
/fs0/chenr6/Database_fs0/MGI/processing/term.gene/MP:0001926 (24)	MP:0001926	1	2.53	261	1	0	261	1	4.03	261	MP:0001926	female infertility
/fs0/chenr6/Database_fs0/MGI/processing/term.gene/MP:0001927 (12)	MP:0001927	1	3.6	81	1	0	81	1	6.22	81	MP:0001927	abnormal estrous cycle
/fs0/chenr6/Database_fs0/MGI/processing/term.gene/MP:0001928 (7)	MP:0001928	1	3.77	63	1	0	63	1	3.69	63	MP:0001928	abnormal ovulation
/fs0/chenr6/Database_fs0/MGI/processing/term.gene/MP:0001929 (61)	MP:0001929	1	1.1	619	1	0.74	619	1	1.36	619	MP:0001929	abnormal gametogenesis
/fs0/chenr6/Database_fs0/MGI/processing/term.gene/MP:0001930 (14)	MP:0001930	1	0.38	159	1	0.87	159	1	0	159	MP:0001930	abnormal meiosis
/fs0/chenr6/Database_fs0/MGI/processing/term.gene/MP:0001931 (10)	MP:0001931	1	2.15	126	1	0	126	1	2.95	126	MP:0001931	abnormal oogenesis
/fs0/chenr6/Database_fs0/MGI/processing/term.gene/MP:0001932 (6)	MP:0001932	1	1	80	1	0	80	1	1.63	80	MP:0001932	abnormal spermiogenesis
/fs0/chenr6/Database_fs0/MGI/processing/term.gene/MP:0001933 (29)	MP:0001933	1	1.92	278	1	1.76	278	1	2.19	278	MP:0001933	abnormal litter size
/fs0/chenr6/Database_fs0/MGI/processing/term.gene/MP:0001935 (27)	MP:0001935	1	1.43	268	1	1.31	268	1	1.63	268	MP:0001935	decreased litter size
/fs0/chenr6/Database_fs0/MGI/processing/term.gene/MP:0001944 (14)	MP:0001944	1	2.01	228	1	4.27	228	1	0.97	228	MP:0001944	abnormal pancreas morphology
/fs0/chenr6/Database_fs0/MGI/processing/term.gene/MP:0001967 (3)	MP:0001967	1	2.5	97	1	0	97	1	1.63	97	MP:0001967	deafness
/fs0/chenr6/Database_fs0/MGI/processing/term.gene/MP:0001968 (16)	MP:0001968	1	2.29	253	1	3.18	253	1	2.46	253	MP:0001968	abnormal touch/ nociception
/fs0/chenr6/Database_fs0/MGI/processing/term.gene/MP:0001970 (13)	MP:0001970	1	2.23	204	1	2.64	204	1	2.95	204	MP:0001970	abnormal pain threshold
/fs0/chenr6/Database_fs0/MGI/processing/term.gene/MP:0001973 (5)	MP:0001973	1	1.25	89	1	0	89	1	1.63	89	MP:0001973	increased thermal nociceptive threshold
/fs0/chenr6/Database_fs0/MGI/processing/term.gene/MP:0002018 (19)	MP:0002018	1	3.7	208	1	8.13	208	1	1.4	208	MP:0002018	increased malignant tumor incidence
/fs0/chenr6/Database_fs0/MGI/processing/term.gene/MP:0002021 (12)	MP:0002021	1	3.6	117	1	4.27	117	1	2.44	117	MP:0002021	increased incidence of induced tumors
/fs0/chenr6/Database_fs0/MGI/processing/term.gene/MP:0002027 (7)	MP:0002027	1	2	51	1	2.62	51	1	1.63	51	MP:0002027	increased lung adenocarcinoma incidence
/fs0/chenr6/Database_fs0/MGI/processing/term.gene/MP:0002032 (9)	MP:0002032	1	2.51	85	1	5.28	85	1	1.22	85	MP:0002032	increased sarcoma incidence
/fs0/chenr6/Database_fs0/MGI/processing/term.gene/MP:0002038 (17)	MP:0002038	1	4.52	174	1	8.13	174	1	1.96	174	MP:0002038	increased carcinoma incidence
/fs0/chenr6/Database_fs0/MGI/processing/term.gene/MP:0002052 (8)	MP:0002052	1	1.67	93	1	1.75	93	1	1.63	93	MP:0002052	decreased tumor incidence
/fs0/chenr6/Database_fs0/MGI/processing/term.gene/MP:0002053 (6)	MP:0002053	1	2.5	73	1	2.62	73	1	2.44	73	MP:0002053	decreased incidence of induced tumors
/fs0/chenr6/Database_fs0/MGI/processing/term.gene/MP:0002059 (20)	MP:0002059	1	0.88	115	1	1.75	115	1	0.97	115	MP:0002059	abnormal seminal vesicle morphology
/fs0/chenr6/Database_fs0/MGI/processing/term.gene/MP:0002061 (5)	MP:0002061	1	20.16	79	1	Inf	79	1	9.81	79	MP:0002061	abnormal aggression-related behavior
/fs0/chenr6/Database_fs0/MGI/processing/term.gene/MP:0002064 (13)	MP:0002064	1	4.34	299	1	3.98	299	1	3.69	299	MP:0002064	seizures
/fs0/chenr6/Database_fs0/MGI/processing/term.gene/MP:0002069 (48)	MP:0002069	1	1.5	515	1	1.39	515	1	1.74	515	MP:0002069	abnormal consumption behavior
/fs0/chenr6/Database_fs0/MGI/processing/term.gene/MP:0002073 (17)	MP:0002073	1	5.75	194	1	3.18	194	0.809	15.03	194	MP:0002073	abnormal hair growth
/fs0/chenr6/Database_fs0/MGI/processing/term.gene/MP:0002074 (6)	MP:0002074	1	0	53	1	0	53	1	0	53	MP:0002074	abnormal hair texture
/fs0/chenr6/Database_fs0/MGI/processing/term.gene/MP:0002075 (12)	MP:0002075	1	2.51	194	1	1.75	194	1	2.46	194	MP:0002075	abnormal coat/hair pigmentation
/fs0/chenr6/Database_fs0/MGI/processing/term.gene/MP:0002078 (97)	MP:0002078	1	1.5	1001	1	1.48	1001	1	1.44	1001	MP:0002078	abnormal glucose homeostasis
/fs0/chenr6/Database_fs0/MGI/processing/term.gene/MP:0002079 (12)	MP:0002079	1	2.51	155	1	5.31	155	1	0.97	155	MP:0002079	increased circulating insulin level
/fs0/chenr6/Database_fs0/MGI/processing/term.gene/MP:0002084 (32)	MP:0002084	1	3.07	385	1	3.59	385	1	2.48	385	MP:0002084	abnormal developmental patterning
/fs0/chenr6/Database_fs0/MGI/processing/term.gene/MP:0002090 (5)	MP:0002090	1	3.34	67	1	5.28	67	1	0	67	MP:0002090	abnormal vision
/fs0/chenr6/Database_fs0/MGI/processing/term.gene/MP:0002095 (5)	MP:0002095	1	3.34	74	1	0	74	1	3.27	74	MP:0002095	abnormal skin pigmentation
/fs0/chenr6/Database_fs0/MGI/processing/term.gene/MP:0002098 (11)	MP:0002098	1	1.88	87	1	1.75	87	1	1.96	87	MP:0002098	abnormal vibrissa morphology
/fs0/chenr6/Database_fs0/MGI/processing/term.gene/MP:0002100 (13)	MP:0002100	1	3.15	171	1	10.7	171	1	1.63	171	MP:0002100	abnormal tooth morphology
/fs0/chenr6/Database_fs0/MGI/processing/term.gene/MP:0002102 (21)	MP:0002102	1	2.53	368	1	3.98	368	1	2.06	368	MP:0002102	abnormal ear morphology
/fs0/chenr6/Database_fs0/MGI/processing/term.gene/MP:0002109 (64)	MP:0002109	1	1.85	639	1	3.24	639	1	1.54	639	MP:0002109	abnormal limb morphology
/fs0/chenr6/Database_fs0/MGI/processing/term.gene/MP:0002110 (21)	MP:0002110	1	2.02	247	1	2.65	247	1	2.19	247	MP:0002110	abnormal digit morphology
/fs0/chenr6/Database_fs0/MGI/processing/term.gene/MP:0002111 (24)	MP:0002111	1	1.68	306	1	1.76	306	1	1.63	306	MP:0002111	abnormal tail morphology
/fs0/chenr6/Database_fs0/MGI/processing/term.gene/MP:0002113 (29)	MP:0002113	1	2.68	367	1	2.22	367	1	4.14	367	MP:0002113	abnormal skeleton development
/fs0/chenr6/Database_fs0/MGI/processing/term.gene/MP:0002115 (33)	MP:0002115	1	1.9	374	1	2.97	374	1	1.76	374	MP:0002115	abnormal limb bone morphology
/fs0/chenr6/Database_fs0/MGI/processing/term.gene/MP:0002118 (93)	MP:0002118	1	1.69	979	1	2.03	979	1	1.56	979	MP:0002118	abnormal lipid homeostasis
/fs0/chenr6/Database_fs0/MGI/processing/term.gene/MP:0002136 (29)	MP:0002136	1	2.68	308	1	2.27	308	1	2.69	308	MP:0002136	abnormal kidney physiology
/fs0/chenr6/Database_fs0/MGI/processing/term.gene/MP:0002139 (30)	MP:0002139	1	2.54	307	1	1.93	307	1	3.32	307	MP:0002139	abnormal hepatobiliary system physiology
/fs0/chenr6/Database_fs0/MGI/processing/term.gene/MP:0002144 (22)	MP:0002144	1	3.53	235	1	5.41	235	1	2.1	235	MP:0002144	abnormal B cell differentiation
/fs0/chenr6/Database_fs0/MGI/processing/term.gene/MP:0002145 (25)	MP:0002145	1	4.03	250	1	4.48	250	1	4.39	250	MP:0002145	abnormal T cell differentiation
/fs0/chenr6/Database_fs0/MGI/processing/term.gene/MP:0002148 (12)	MP:0002148	1	7.12	150	1	1.31	150	0.0444	35.3	150	MP:0002148	abnormal hypersensitivity reaction
/fs0/chenr6/Database_fs0/MGI/processing/term.gene/MP:0002160 (103)	MP:0002160	1	1.65	1067	1	1.5	1067	1	1.93	1067	MP:0002160	abnormal reproductive system morphology
/fs0/chenr6/Database_fs0/MGI/processing/term.gene/MP:0002161 (107)	MP:0002161	1	1.66	1161	1	1.33	1161	1	1.94	1161	MP:0002161	abnormal fertility/fecundity
/fs0/chenr6/Database_fs0/MGI/processing/term.gene/MP:0002163 (155)	MP:0002163	1	1.92	1576	1	2.38	1576	1	1.8	1576	MP:0002163	abnormal gland morphology
/fs0/chenr6/Database_fs0/MGI/processing/term.gene/MP:0002164 (42)	MP:0002164	1	1.58	488	1	1.77	488	1	1.29	488	MP:0002164	abnormal gland physiology
/fs0/chenr6/Database_fs0/MGI/processing/term.gene/MP:0002175 (7)	MP:0002175	1	6.72	57	1	7.97	57	1	9.81	57	MP:0002175	decreased brain weight
/fs0/chenr6/Database_fs0/MGI/processing/term.gene/MP:0002177 (7)	MP:0002177	1	6.72	97	1	10.55	97	1	7.39	97	MP:0002177	abnormal outer ear morphology
/fs0/chenr6/Database_fs0/MGI/processing/term.gene/MP:0002182 (8)	MP:0002182	1	1.67	110	1	10.55	110	1	0	110	MP:0002182	abnormal astrocyte morphology
/fs0/chenr6/Database_fs0/MGI/processing/term.gene/MP:0002183 (9)	MP:0002183	1	1.43	129	1	5.28	129	1	0	129	MP:0002183	gliosis
/fs0/chenr6/Database_fs0/MGI/processing/term.gene/MP:0002184 (20)	MP:0002184	1	3.39	164	1	1.31	164	1	8.8	164	MP:0002184	abnormal innervation
/fs0/chenr6/Database_fs0/MGI/processing/term.gene/MP:0002188 (19)	MP:0002188	1	4.59	157	1	5.38	157	1	4.95	157	MP:0002188	small heart
/fs0/chenr6/Database_fs0/MGI/processing/term.gene/MP:0002192 (4)	MP:0002192	1	5.01	66	1	Inf	66	1	2.44	66	MP:0002192	hydrops fetalis
/fs0/chenr6/Database_fs0/MGI/processing/term.gene/MP:0002199 (12)	MP:0002199	1	5.06	120	1	2.62	120	1	6.22	120	MP:0002199	abnormal brain commissure morphology
/fs0/chenr6/Database_fs0/MGI/processing/term.gene/MP:0002200 (27)	MP:0002200	1	4.11	260	1	3.59	260	1	6	260	MP:0002200	abnormal brain ventricular system morphology
/fs0/chenr6/Database_fs0/MGI/processing/term.gene/MP:0002208 (52)	MP:0002208	1	1.19	524	1	0.65	524	1	1.52	524	MP:0002208	abnormal germ cell morphology
/fs0/chenr6/Database_fs0/MGI/processing/term.gene/MP:0002209 (40)	MP:0002209	1	1.06	386	1	0.4	386	1	1.48	386	MP:0002209	decreased germ cell number
/fs0/chenr6/Database_fs0/MGI/processing/term.gene/MP:0002210 (52)	MP:0002210	1	1.35	484	1	1.17	484	1	1.65	484	MP:0002210	abnormal sex determination
/fs0/chenr6/Database_fs0/MGI/processing/term.gene/MP:0002211 (49)	MP:0002211	1	1.29	454	1	1.24	454	1	1.48	454	MP:0002211	abnormal primary sex determination
/fs0/chenr6/Database_fs0/MGI/processing/term.gene/MP:0002212 (11)	MP:0002212	1	1.88	63	1	0	63	1	2.95	63	MP:0002212	abnormal secondary sex determination
/fs0/chenr6/Database_fs0/MGI/processing/term.gene/MP:0002216 (30)	MP:0002216	1	1.53	281	1	1.31	281	1	1.79	281	MP:0002216	abnormal seminiferous tubule morphology
/fs0/chenr6/Database_fs0/MGI/processing/term.gene/MP:0002217 (4)	MP:0002217	1	1.67	53	1	5.25	53	1	2.44	53	MP:0002217	small lymph nodes
/fs0/chenr6/Database_fs0/MGI/processing/term.gene/MP:0002221 (68)	MP:0002221	1	2.32	739	1	2.89	739	1	2.27	739	MP:0002221	abnormal lymph organ size
/fs0/chenr6/Database_fs0/MGI/processing/term.gene/MP:0002224 (53)	MP:0002224	1	2.44	553	1	2.7	553	1	2.91	553	MP:0002224	abnormal spleen size
/fs0/chenr6/Database_fs0/MGI/processing/term.gene/MP:0002229 (27)	MP:0002229	1	4.11	342	1	3.55	342	1	4.48	342	MP:0002229	neurodegeneration
/fs0/chenr6/Database_fs0/MGI/processing/term.gene/MP:0002230 (3)	MP:0002230	1	2.5	53	1	0	53	1	2.44	53	MP:0002230	abnormal primitive streak formation
/fs0/chenr6/Database_fs0/MGI/processing/term.gene/MP:0002231 (8)	MP:0002231	1	0.71	118	1	0	118	1	0.97	118	MP:0002231	abnormal primitive streak morphology
/fs0/chenr6/Database_fs0/MGI/processing/term.gene/MP:0002233 (10)	MP:0002233	1	7.6	117	1	10.7	117	1	7.39	117	MP:0002233	abnormal nose morphology
/fs0/chenr6/Database_fs0/MGI/processing/term.gene/MP:0002269 (10)	MP:0002269	1	2.15	78	1	0	78	1	4.93	78	MP:0002269	muscular atrophy
/fs0/chenr6/Database_fs0/MGI/processing/term.gene/MP:0002270 (20)	MP:0002270	1	2.16	155	1	3.52	155	1	2.19	155	MP:0002270	abnormal pulmonary alveolus morphology
/fs0/chenr6/Database_fs0/MGI/processing/term.gene/MP:0002272 (17)	MP:0002272	1	3.55	247	1	3.55	247	1	3.69	247	MP:0002272	abnormal nervous system electrophysiology
/fs0/chenr6/Database_fs0/MGI/processing/term.gene/MP:0002273 (8)	MP:0002273	1	3.01	52	1	0	52	1	3.69	52	MP:0002273	abnormal pulmonary alveolus epithelial cell morphology
/fs0/chenr6/Database_fs0/MGI/processing/term.gene/MP:0002279 (7)	MP:0002279	1	12.64	65	1	5.28	65	1	19.82	65	MP:0002279	abnormal diaphragm morphology
/fs0/chenr6/Database_fs0/MGI/processing/term.gene/MP:0002282 (7)	MP:0002282	1	6.72	66	1	Inf	66	1	6.6	66	MP:0002282	abnormal trachea morphology
/fs0/chenr6/Database_fs0/MGI/processing/term.gene/MP:0002310 (7)	MP:0002310	1	0.83	62	1	0	62	1	1.63	62	MP:0002310	decreased susceptibility to hepatic steatosis
/fs0/chenr6/Database_fs0/MGI/processing/term.gene/MP:0002314 (5)	MP:0002314	1	1.25	64	1	0	64	1	1.63	64	MP:0002314	abnormal respiratory mechanics
/fs0/chenr6/Database_fs0/MGI/processing/term.gene/MP:0002339 (25)	MP:0002339	1	2.38	269	1	3.55	269	1	2.47	269	MP:0002339	abnormal lymph node morphology
/fs0/chenr6/Database_fs0/MGI/processing/term.gene/MP:0002356 (9)	MP:0002356	1	2.51	94	1	5.25	94	1	1.96	94	MP:0002356	abnormal spleen red pulp morphology
/fs0/chenr6/Database_fs0/MGI/processing/term.gene/MP:0002357 (26)	MP:0002357	1	2.25	247	1	1.76	247	1	2.75	247	MP:0002357	abnormal spleen white pulp morphology
/fs0/chenr6/Database_fs0/MGI/processing/term.gene/MP:0002359 (10)	MP:0002359	1	3.35	91	1	1.31	91	1	7.39	91	MP:0002359	abnormal spleen germinal center morphology
/fs0/chenr6/Database_fs0/MGI/processing/term.gene/MP:0002362 (11)	MP:0002362	1	2.87	105	1	3.52	105	1	2.45	105	MP:0002362	abnormal spleen marginal zone morphology
/fs0/chenr6/Database_fs0/MGI/processing/term.gene/MP:0002364 (34)	MP:0002364	1	2.44	284	1	4.76	284	1	1.98	284	MP:0002364	abnormal thymus size
/fs0/chenr6/Database_fs0/MGI/processing/term.gene/MP:0002367 (8)	MP:0002367	1	5.04	66	1	5.28	66	1	4.9	66	MP:0002367	abnormal thymus lobule morphology
/fs0/chenr6/Database_fs0/MGI/processing/term.gene/MP:0002376 (9)	MP:0002376	1	1.43	141	1	1.31	141	1	3.27	141	MP:0002376	abnormal dendritic cell physiology
/fs0/chenr6/Database_fs0/MGI/processing/term.gene/MP:0002378 (7)	MP:0002378	1	3.77	77	1	1.75	77	1	9.81	77	MP:0002378	abnormal gut-associated lymphoid tissue morphology
/fs0/chenr6/Database_fs0/MGI/processing/term.gene/MP:0002398 (43)	MP:0002398	1	3.06	421	1	1.63	421	0.296	5.14	421	MP:0002398	abnormal bone marrow cell morphology/development
/fs0/chenr6/Database_fs0/MGI/processing/term.gene/MP:0002401 (40)	MP:0002401	1	3.09	410	1	4.5	410	1	2.49	410	MP:0002401	abnormal lymphopoiesis
/fs0/chenr6/Database_fs0/MGI/processing/term.gene/MP:0002403 (8)	MP:0002403	1	3.01	77	1	Inf	77	1	0.97	77	MP:0002403	abnormal pre-B cell morphology
/fs0/chenr6/Database_fs0/MGI/processing/term.gene/MP:0002405 (15)	MP:0002405	1	3.37	162	1	4.27	162	1	2.45	162	MP:0002405	respiratory system inflammation
/fs0/chenr6/Database_fs0/MGI/processing/term.gene/MP:0002407 (9)	MP:0002407	1	6.32	101	1	15.94	101	1	3.27	101	MP:0002407	abnormal double-negative T cell morphology
/fs0/chenr6/Database_fs0/MGI/processing/term.gene/MP:0002408 (11)	MP:0002408	1	4.21	127	1	5.31	127	1	3.27	127	MP:0002408	abnormal double-positive T cell morphology
/fs0/chenr6/Database_fs0/MGI/processing/term.gene/MP:0002409 (14)	MP:0002409	1	2.01	149	1	0	149	1	4.95	149	MP:0002409	decreased susceptibility to infection
/fs0/chenr6/Database_fs0/MGI/processing/term.gene/MP:0002411 (7)	MP:0002411	1	2	78	1	0	78	1	4.9	78	MP:0002411	decreased susceptibility to bacterial infection
/fs0/chenr6/Database_fs0/MGI/processing/term.gene/MP:0002412 (16)	MP:0002412	1	3.03	219	1	2.64	219	1	4.14	219	MP:0002412	increased susceptibility to bacterial infection
/fs0/chenr6/Database_fs0/MGI/processing/term.gene/MP:0002413 (8)	MP:0002413	1	5.04	83	1	5.28	83	1	4.9	83	MP:0002413	abnormal megakaryocyte progenitor cell morphology
/fs0/chenr6/Database_fs0/MGI/processing/term.gene/MP:0002414 (18)	MP:0002414	1	4.07	151	1	3.98	151	1	6.22	151	MP:0002414	abnormal myeloblast morphology/development
/fs0/chenr6/Database_fs0/MGI/processing/term.gene/MP:0002416 (5)	MP:0002416	1	3.34	53	1	0	53	1	4.9	53	MP:0002416	abnormal proerythroblast morphology
/fs0/chenr6/Database_fs0/MGI/processing/term.gene/MP:0002417 (7)	MP:0002417	1	3.77	74	1	2.62	74	1	4.9	74	MP:0002417	abnormal megakaryocyte morphology
/fs0/chenr6/Database_fs0/MGI/processing/term.gene/MP:0002418 (9)	MP:0002418	1	2.51	103	1	0	103	1	4.93	103	MP:0002418	increased susceptibility to viral infection
/fs0/chenr6/Database_fs0/MGI/processing/term.gene/MP:0002423 (3)	MP:0002423	1	10.02	56	1	5.25	56	1	4.88	56	MP:0002423	abnormal mast cell physiology
/fs0/chenr6/Database_fs0/MGI/processing/term.gene/MP:0002424 (5)	MP:0002424	1	3.34	74	1	0	74	1	3.27	74	MP:0002424	abnormal reticulocyte morphology
/fs0/chenr6/Database_fs0/MGI/processing/term.gene/MP:0002425 (15)	MP:0002425	1	2.52	241	1	1.05	241	1	4.14	241	MP:0002425	altered susceptibility to autoimmune disorder
/fs0/chenr6/Database_fs0/MGI/processing/term.gene/MP:0002428 (4)	MP:0002428	1	5.01	52	1	Inf	52	1	2.44	52	MP:0002428	abnormal semicircular canal morphology
/fs0/chenr6/Database_fs0/MGI/processing/term.gene/MP:0002432 (25)	MP:0002432	1	2.38	352	1	1.76	352	1	3.74	352	MP:0002432	abnormal CD4-positive, alpha beta T cell morphology
/fs0/chenr6/Database_fs0/MGI/processing/term.gene/MP:0002435 (35)	MP:0002435	1	2.03	520	1	1.63	520	1	2.91	520	MP:0002435	abnormal effector T cell morphology
/fs0/chenr6/Database_fs0/MGI/processing/term.gene/MP:0002439 (5)	MP:0002439	1	20.16	56	1	5.25	56	1	Inf	56	MP:0002439	abnormal plasma cell morphology
/fs0/chenr6/Database_fs0/MGI/processing/term.gene/MP:0002441 (47)	MP:0002441	1	2.66	425	1	3.45	425	1	2.37	425	MP:0002441	abnormal granulocyte morphology
/fs0/chenr6/Database_fs0/MGI/processing/term.gene/MP:0002444 (40)	MP:0002444	1	3.09	496	1	2.36	496	1	5.07	496	MP:0002444	abnormal T cell physiology
/fs0/chenr6/Database_fs0/MGI/processing/term.gene/MP:0002446 (24)	MP:0002446	1	3.05	329	1	6.5	329	1	1.63	329	MP:0002446	abnormal macrophage morphology
/fs0/chenr6/Database_fs0/MGI/processing/term.gene/MP:0002447 (60)	MP:0002447	1	2.6	677	1	2.27	677	1	3.33	677	MP:0002447	abnormal erythrocyte morphology
/fs0/chenr6/Database_fs0/MGI/processing/term.gene/MP:0002458 (37)	MP:0002458	1	3.13	441	1	3.97	441	1	2.29	441	MP:0002458	abnormal B cell number
/fs0/chenr6/Database_fs0/MGI/processing/term.gene/MP:0002460 (21)	MP:0002460	1	4.65	257	1	4.48	257	1	4.97	257	MP:0002460	decreased immunoglobulin level
/fs0/chenr6/Database_fs0/MGI/processing/term.gene/MP:0002462 (13)	MP:0002462	1	4.34	210	1	2.64	210	1	3.96	210	MP:0002462	abnormal granulocyte physiology
/fs0/chenr6/Database_fs0/MGI/processing/term.gene/MP:0002463 (7)	MP:0002463	1	12.64	141	1	10.55	141	1	14.79	141	MP:0002463	abnormal neutrophil physiology
/fs0/chenr6/Database_fs0/MGI/processing/term.gene/MP:0002492 (7)	MP:0002492	1	3.77	55	1	1.75	55	1	9.81	55	MP:0002492	decreased IgE level
/fs0/chenr6/Database_fs0/MGI/processing/term.gene/MP:0002495 (9)	MP:0002495	1	6.32	55	1	2.62	55	1	6.6	55	MP:0002495	increased IgA level
/fs0/chenr6/Database_fs0/MGI/processing/term.gene/MP:0002497 (3)	MP:0002497	1	2.5	65	1	0	65	1	4.88	65	MP:0002497	increased IgE level
/fs0/chenr6/Database_fs0/MGI/processing/term.gene/MP:0002499 (6)	MP:0002499	1	2.5	58	1	0	58	1	9.81	58	MP:0002499	chronic inflammation
/fs0/chenr6/Database_fs0/MGI/processing/term.gene/MP:0002531 (5)	MP:0002531	1	20.16	68	1	5.25	68	1	Inf	68	MP:0002531	abnormal type I hypersensitivity reaction
/fs0/chenr6/Database_fs0/MGI/processing/term.gene/MP:0002534 (6)	MP:0002534	1	2.5	80	1	0	80	1	9.81	80	MP:0002534	abnormal type IV hypersensitivity reaction
/fs0/chenr6/Database_fs0/MGI/processing/term.gene/MP:0002551 (19)	MP:0002551	1	4.59	204	1	2.65	204	1	6	204	MP:0002551	abnormal blood coagulation
/fs0/chenr6/Database_fs0/MGI/processing/term.gene/MP:0002566 (8)	MP:0002566	1	8.42	71	1	10.55	71	1	9.91	71	MP:0002566	abnormal sexual interaction
/fs0/chenr6/Database_fs0/MGI/processing/term.gene/MP:0002574 (5)	MP:0002574	1	20.16	67	1	Inf	67	1	4.88	67	MP:0002574	increased vertical activity
/fs0/chenr6/Database_fs0/MGI/processing/term.gene/MP:0002586 (3)	MP:0002586	1	2.5	54	1	0	54	1	2.44	54	MP:0002586	abnormal platelet volume
/fs0/chenr6/Database_fs0/MGI/processing/term.gene/MP:0002590 (10)	MP:0002590	1	3.35	127	1	1.75	127	1	4.93	127	MP:0002590	increased mean corpuscular volume
/fs0/chenr6/Database_fs0/MGI/processing/term.gene/MP:0002591 (6)	MP:0002591	1	5.02	81	1	0	81	1	4.93	81	MP:0002591	decreased mean corpuscular volume
/fs0/chenr6/Database_fs0/MGI/processing/term.gene/MP:0002596 (17)	MP:0002596	1	2.1	209	1	2.11	209	1	2.1	209	MP:0002596	abnormal hematocrit
/fs0/chenr6/Database_fs0/MGI/processing/term.gene/MP:0002602 (14)	MP:0002602	1	3.79	116	1	3.52	116	1	6.6	116	MP:0002602	abnormal eosinophil cell number
/fs0/chenr6/Database_fs0/MGI/processing/term.gene/MP:0002608 (8)	MP:0002608	1	1.67	62	1	1.31	62	1	2.44	62	MP:0002608	increased hematocrit
/fs0/chenr6/Database_fs0/MGI/processing/term.gene/MP:0002620 (18)	MP:0002620	1	1.93	183	1	3.98	183	1	1.22	183	MP:0002620	abnormal monocyte morphology
/fs0/chenr6/Database_fs0/MGI/processing/term.gene/MP:0002622 (7)	MP:0002622	1	3.77	162	1	5.28	162	1	1.22	162	MP:0002622	abnormal cochlear hair cell morphology
/fs0/chenr6/Database_fs0/MGI/processing/term.gene/MP:0002625 (4)	MP:0002625	1	5.01	54	1	5.25	54	1	4.88	54	MP:0002625	heart left ventricle hypertrophy
/fs0/chenr6/Database_fs0/MGI/processing/term.gene/MP:0002626 (5)	MP:0002626	1	1.25	75	1	5.25	75	1	0	75	MP:0002626	increased heart rate
/fs0/chenr6/Database_fs0/MGI/processing/term.gene/MP:0002628 (17)	MP:0002628	1	2.1	180	1	3.98	180	1	1.22	180	MP:0002628	hepatic steatosis
/fs0/chenr6/Database_fs0/MGI/processing/term.gene/MP:0002631 (19)	MP:0002631	1	1.79	120	1	1.5	120	1	2.82	120	MP:0002631	abnormal epididymis morphology
/fs0/chenr6/Database_fs0/MGI/processing/term.gene/MP:0002633 (4)	MP:0002633	1	5.01	52	1	Inf	52	1	2.44	52	MP:0002633	persistent truncus arteriosis
/fs0/chenr6/Database_fs0/MGI/processing/term.gene/MP:0002637 (7)	MP:0002637	1	2	51	1	0	51	1	3.27	51	MP:0002637	small uterus
/fs0/chenr6/Database_fs0/MGI/processing/term.gene/MP:0002639 (8)	MP:0002639	1	5.04	63	1	5.28	63	1	4.9	63	MP:0002639	micrognathia
/fs0/chenr6/Database_fs0/MGI/processing/term.gene/MP:0002640 (3)	MP:0002640	1	2.5	64	1	0	64	1	2.44	64	MP:0002640	reticulocytosis
/fs0/chenr6/Database_fs0/MGI/processing/term.gene/MP:0002644 (24)	MP:0002644	1	1.32	188	1	1.16	188	1	1.47	188	MP:0002644	decreased circulating triglyceride level
/fs0/chenr6/Database_fs0/MGI/processing/term.gene/MP:0002668 (11)	MP:0002668	1	2.87	76	1	1.05	76	1	4.93	76	MP:0002668	abnormal circulating potassium level
/fs0/chenr6/Database_fs0/MGI/processing/term.gene/MP:0002673 (36)	MP:0002673	1	1	340	1	0.43	340	1	1.36	340	MP:0002673	abnormal sperm number
/fs0/chenr6/Database_fs0/MGI/processing/term.gene/MP:0002674 (15)	MP:0002674	1	1.25	168	1	0	168	1	1.63	168	MP:0002674	abnormal sperm motility
/fs0/chenr6/Database_fs0/MGI/processing/term.gene/MP:0002675 (14)	MP:0002675	1	1.36	147	1	0	147	1	1.63	147	MP:0002675	asthenozoospermia
/fs0/chenr6/Database_fs0/MGI/processing/term.gene/MP:0002679 (11)	MP:0002679	1	1.88	85	1	0	85	1	2.46	85	MP:0002679	abnormal corpus luteum morphology
/fs0/chenr6/Database_fs0/MGI/processing/term.gene/MP:0002682 (4)	MP:0002682	1	1.67	52	1	Inf	52	1	0	52	MP:0002682	decreased mature ovarian follicle number
/fs0/chenr6/Database_fs0/MGI/processing/term.gene/MP:0002687 (23)	MP:0002687	1	1.39	189	1	0.87	189	1	1.64	189	MP:0002687	oligozoospermia
/fs0/chenr6/Database_fs0/MGI/processing/term.gene/MP:0002693 (21)	MP:0002693	1	1.18	210	1	2.65	210	1	0.4	210	MP:0002693	abnormal pancreas physiology
/fs0/chenr6/Database_fs0/MGI/processing/term.gene/MP:0002694 (15)	MP:0002694	1	0.77	132	1	1.31	132	1	0.48	132	MP:0002694	abnormal pancreas secretion
/fs0/chenr6/Database_fs0/MGI/processing/term.gene/MP:0002697 (20)	MP:0002697	1	2.16	167	1	3.35	167	1	1.4	167	MP:0002697	abnormal eye size
/fs0/chenr6/Database_fs0/MGI/processing/term.gene/MP:0002699 (4)	MP:0002699	1	15.08	70	1	10.55	70	1	Inf	70	MP:0002699	abnormal vitreous body morphology
/fs0/chenr6/Database_fs0/MGI/processing/term.gene/MP:0002702 (11)	MP:0002702	1	0.5	89	1	0	89	1	0.81	89	MP:0002702	decreased circulating free fatty acid level
/fs0/chenr6/Database_fs0/MGI/processing/term.gene/MP:0002703 (18)	MP:0002703	1	1.93	189	1	2.64	189	1	1.63	189	MP:0002703	abnormal renal tubule morphology
/fs0/chenr6/Database_fs0/MGI/processing/term.gene/MP:0002705 (6)	MP:0002705	1	1	88	1	2.62	88	1	0	88	MP:0002705	dilated renal tubules
/fs0/chenr6/Database_fs0/MGI/processing/term.gene/MP:0002706 (23)	MP:0002706	1	2.7	243	1	1.5	243	1	3.9	243	MP:0002706	abnormal kidney size
/fs0/chenr6/Database_fs0/MGI/processing/term.gene/MP:0002707 (12)	MP:0002707	1	2.51	99	1	3.52	99	1	2.46	99	MP:0002707	abnormal kidney weight
/fs0/chenr6/Database_fs0/MGI/processing/term.gene/MP:0002718 (4)	MP:0002718	1	1.67	79	1	2.62	79	1	0	79	MP:0002718	abnormal inner cell mass morphology
/fs0/chenr6/Database_fs0/MGI/processing/term.gene/MP:0002725 (17)	MP:0002725	1	2.75	96	1	2.65	96	1	3.96	96	MP:0002725	abnormal vein morphology
/fs0/chenr6/Database_fs0/MGI/processing/term.gene/MP:0002727 (29)	MP:0002727	1	1.6	253	1	1.9	253	1	1.08	253	MP:0002727	decreased circulating insulin level
/fs0/chenr6/Database_fs0/MGI/processing/term.gene/MP:0002729 (4)	MP:0002729	1	5.01	56	1	Inf	56	1	2.44	56	MP:0002729	abnormal inner ear canal morphology
/fs0/chenr6/Database_fs0/MGI/processing/term.gene/MP:0002733 (7)	MP:0002733	1	3.77	133	1	10.55	133	1	1.63	133	MP:0002733	abnormal thermal nociception
/fs0/chenr6/Database_fs0/MGI/processing/term.gene/MP:0002743 (12)	MP:0002743	1	1.67	84	1	0	84	1	2.46	84	MP:0002743	glomerulonephritis
/fs0/chenr6/Database_fs0/MGI/processing/term.gene/MP:0002745 (4)	MP:0002745	1	5.01	54	1	Inf	54	1	2.44	54	MP:0002745	abnormal atrioventricular valve morphology
/fs0/chenr6/Database_fs0/MGI/processing/term.gene/MP:0002746 (6)	MP:0002746	1	5.02	58	1	5.25	58	1	4.9	58	MP:0002746	abnormal semilunar valve morphology
/fs0/chenr6/Database_fs0/MGI/processing/term.gene/MP:0002751 (6)	MP:0002751	1	2.5	54	1	0	54	1	3.27	54	MP:0002751	abnormal autonomic nervous system morphology
/fs0/chenr6/Database_fs0/MGI/processing/term.gene/MP:0002753 (8)	MP:0002753	1	8.42	73	1	10.55	73	1	4.93	73	MP:0002753	dilated heart left ventricle
/fs0/chenr6/Database_fs0/MGI/processing/term.gene/MP:0002757 (10)	MP:0002757	1	1.25	133	1	3.52	133	1	0	133	MP:0002757	decreased vertical activity
/fs0/chenr6/Database_fs0/MGI/processing/term.gene/MP:0002759 (8)	MP:0002759	1	0.71	105	1	1.31	105	1	0	105	MP:0002759	abnormal caudal vertebrae morphology
/fs0/chenr6/Database_fs0/MGI/processing/term.gene/MP:0002764 (14)	MP:0002764	1	1.36	142	1	1.75	142	1	1.4	142	MP:0002764	short tibia
/fs0/chenr6/Database_fs0/MGI/processing/term.gene/MP:0002784 (7)	MP:0002784	1	3.77	60	1	0	60	1	4.93	60	MP:0002784	abnormal Sertoli cell morphology
/fs0/chenr6/Database_fs0/MGI/processing/term.gene/MP:0002786 (8)	MP:0002786	1	0.71	65	1	0	65	1	2.44	65	MP:0002786	abnormal Leydig cell morphology
/fs0/chenr6/Database_fs0/MGI/processing/term.gene/MP:0002792 (9)	MP:0002792	1	0.62	124	1	1.75	124	1	0	124	MP:0002792	abnormal retinal vasculature morphology
/fs0/chenr6/Database_fs0/MGI/processing/term.gene/MP:0002816 (6)	MP:0002816	1	0	116	1	0	116	1	0	116	MP:0002816	colitis
/fs0/chenr6/Database_fs0/MGI/processing/term.gene/MP:0002824 (4)	MP:0002824	1	5.01	66	1	5.25	66	1	4.88	66	MP:0002824	abnormal chorioallantoic fusion
/fs0/chenr6/Database_fs0/MGI/processing/term.gene/MP:0002825 (5)	MP:0002825	1	0	58	1	0	58	1	0	58	MP:0002825	abnormal notochord morphology
/fs0/chenr6/Database_fs0/MGI/processing/term.gene/MP:0002827 (25)	MP:0002827	1	3.4	241	1	2.64	241	1	4.03	241	MP:0002827	abnormal renal corpuscle morphology
/fs0/chenr6/Database_fs0/MGI/processing/term.gene/MP:0002828 (8)	MP:0002828	1	1.67	83	1	0	83	1	1.96	83	MP:0002828	abnormal renal glomerular capsule morphology
/fs0/chenr6/Database_fs0/MGI/processing/term.gene/MP:0002833 (12)	MP:0002833	1	7.12	147	1	13.47	147	1	2.45	147	MP:0002833	increased heart weight
/fs0/chenr6/Database_fs0/MGI/processing/term.gene/MP:0002834 (10)	MP:0002834	1	3.35	82	1	1.31	82	1	7.39	82	MP:0002834	decreased heart weight
/fs0/chenr6/Database_fs0/MGI/processing/term.gene/MP:0002835 (2)	MP:0002835	1	5	51	1	Inf	51	1	0	51	MP:0002835	abnormal cranial suture morphology
/fs0/chenr6/Database_fs0/MGI/processing/term.gene/MP:0002842 (10)	MP:0002842	1	1.25	128	1	2.64	128	1	0	128	MP:0002842	increased systemic arterial blood pressure
/fs0/chenr6/Database_fs0/MGI/processing/term.gene/MP:0002843 (7)	MP:0002843	1	0.83	83	1	5.25	83	1	0	83	MP:0002843	decreased systemic arterial blood pressure
/fs0/chenr6/Database_fs0/MGI/processing/term.gene/MP:0002855 (5)	MP:0002855	1	7.54	82	1	Inf	82	1	4.9	82	MP:0002855	abnormal cochlear ganglion morphology
/fs0/chenr6/Database_fs0/MGI/processing/term.gene/MP:0002857 (2)	MP:0002857	1	5	57	1	0	57	1	4.88	57	MP:0002857	cochlear ganglion degeneration
/fs0/chenr6/Database_fs0/MGI/processing/term.gene/MP:0002862 (9)	MP:0002862	1	10.14	110	1	21.4	110	1	4.9	110	MP:0002862	altered righting response
/fs0/chenr6/Database_fs0/MGI/processing/term.gene/MP:0002864 (47)	MP:0002864	1	2.93	573	1	2.71	573	1	3.02	573	MP:0002864	abnormal ocular fundus morphology
/fs0/chenr6/Database_fs0/MGI/processing/term.gene/MP:0002874 (6)	MP:0002874	1	1	143	1	0	143	1	1.63	143	MP:0002874	decreased hemoglobin content
/fs0/chenr6/Database_fs0/MGI/processing/term.gene/MP:0002875 (12)	MP:0002875	1	1	166	1	0.87	166	1	1.22	166	MP:0002875	decreased erythrocyte cell number
/fs0/chenr6/Database_fs0/MGI/processing/term.gene/MP:0002877 (5)	MP:0002877	1	3.34	52	1	0	52	1	3.27	52	MP:0002877	abnormal melanocyte morphology
/fs0/chenr6/Database_fs0/MGI/processing/term.gene/MP:0002891 (17)	MP:0002891	1	2.1	138	1	3.18	138	1	1.4	138	MP:0002891	increased insulin sensitivity
/fs0/chenr6/Database_fs0/MGI/processing/term.gene/MP:0002896 (12)	MP:0002896	1	7.12	157	1	7.13	157	1	7.39	157	MP:0002896	abnormal bone mineralization
/fs0/chenr6/Database_fs0/MGI/processing/term.gene/MP:0002906 (4)	MP:0002906	1	5.01	94	1	5.25	94	1	4.88	94	MP:0002906	increased susceptibility to pharmacologically induced seizures
/fs0/chenr6/Database_fs0/MGI/processing/term.gene/MP:0002910 (4)	MP:0002910	1	15.08	85	1	10.55	85	1	Inf	85	MP:0002910	abnormal excitatory postsynaptic currents
/fs0/chenr6/Database_fs0/MGI/processing/term.gene/MP:0002912 (6)	MP:0002912	1	10.08	78	1	5.25	78	1	14.79	78	MP:0002912	abnormal excitatory postsynaptic potential
/fs0/chenr6/Database_fs0/MGI/processing/term.gene/MP:0002932 (12)	MP:0002932	1	1	241	1	1.31	241	1	0.81	241	MP:0002932	abnormal joint morphology
/fs0/chenr6/Database_fs0/MGI/processing/term.gene/MP:0002933 (4)	MP:0002933	1	5.01	112	1	5.25	112	1	4.9	112	MP:0002933	joint inflammation
/fs0/chenr6/Database_fs0/MGI/processing/term.gene/MP:0002941 (5)	MP:0002941	1	3.34	80	1	Inf	80	1	1.63	80	MP:0002941	increased circulating alanine transaminase level
/fs0/chenr6/Database_fs0/MGI/processing/term.gene/MP:0002942 (9)	MP:0002942	1	1.43	74	1	0	74	1	1.63	74	MP:0002942	decreased circulating alanine transaminase level
/fs0/chenr6/Database_fs0/MGI/processing/term.gene/MP:0002945 (6)	MP:0002945	1	10.08	63	1	7.97	63	1	Inf	63	MP:0002945	abnormal inhibitory postsynaptic currents
/fs0/chenr6/Database_fs0/MGI/processing/term.gene/MP:0002962 (14)	MP:0002962	1	3.79	108	1	1.75	108	1	4.97	108	MP:0002962	increased urine protein level
/fs0/chenr6/Database_fs0/MGI/processing/term.gene/MP:0002968 (7)	MP:0002968	1	2	161	1	0	161	1	9.81	161	MP:0002968	increased circulating alkaline phosphatase level
/fs0/chenr6/Database_fs0/MGI/processing/term.gene/MP:0002970 (22)	MP:0002970	1	2.36	229	1	0.58	229	1	4.99	229	MP:0002970	abnormal white adipose tissue morphology
/fs0/chenr6/Database_fs0/MGI/processing/term.gene/MP:0002971 (13)	MP:0002971	1	4.34	110	1	2.64	110	1	6.6	110	MP:0002971	abnormal brown adipose tissue morphology
/fs0/chenr6/Database_fs0/MGI/processing/term.gene/MP:0002980 (10)	MP:0002980	1	7.6	117	1	21.4	117	1	3.27	117	MP:0002980	abnormal postural reflex
/fs0/chenr6/Database_fs0/MGI/processing/term.gene/MP:0002981 (11)	MP:0002981	1	2.87	85	1	7.97	85	1	0.81	85	MP:0002981	increased liver weight
/fs0/chenr6/Database_fs0/MGI/processing/term.gene/MP:0002987 (3)	MP:0002987	1	0	56	1	0	56	1	0	56	MP:0002987	abnormal urine osmolality
/fs0/chenr6/Database_fs0/MGI/processing/term.gene/MP:0002989 (13)	MP:0002989	1	3.15	168	1	1.75	168	1	4.97	168	MP:0002989	small kidney
/fs0/chenr6/Database_fs0/MGI/processing/term.gene/MP:0002993 (4)	MP:0002993	1	5.01	104	1	5.25	104	1	4.9	104	MP:0002993	arthritis
/fs0/chenr6/Database_fs0/MGI/processing/term.gene/MP:0002998 (9)	MP:0002998	1	4.03	149	1	5.28	149	1	3.27	149	MP:0002998	abnormal bone remodeling
/fs0/chenr6/Database_fs0/MGI/processing/term.gene/MP:0003008 (3)	MP:0003008	1	Inf	51	1	Inf	51	1	0	51	MP:0003008	enhanced long term potentiation
/fs0/chenr6/Database_fs0/MGI/processing/term.gene/MP:0003018 (10)	MP:0003018	1	1.25	84	1	1.05	84	1	1.63	84	MP:0003018	abnormal circulating chloride level
/fs0/chenr6/Database_fs0/MGI/processing/term.gene/MP:0003019 (6)	MP:0003019	1	1	50	1	1.75	50	1	0	50	MP:0003019	increased circulating chloride level
/fs0/chenr6/Database_fs0/MGI/processing/term.gene/MP:0003036 (6)	MP:0003036	1	2.5	88	1	5.28	88	1	0	88	MP:0003036	vertebral transformation
/fs0/chenr6/Database_fs0/MGI/processing/term.gene/MP:0003043 (10)	MP:0003043	1	1.25	133	1	0	133	1	2.45	133	MP:0003043	hypoalgesia
/fs0/chenr6/Database_fs0/MGI/processing/term.gene/MP:0003047 (8)	MP:0003047	1	0.71	119	1	5.25	119	1	0	119	MP:0003047	abnormal thoracic vertebrae morphology
/fs0/chenr6/Database_fs0/MGI/processing/term.gene/MP:0003048 (5)	MP:0003048	1	7.54	118	1	15.94	118	1	0	118	MP:0003048	abnormal cervical vertebrae morphology
/fs0/chenr6/Database_fs0/MGI/processing/term.gene/MP:0003049 (13)	MP:0003049	1	1.5	149	1	1.75	149	1	1.22	149	MP:0003049	abnormal lumbar vertebrae morphology
/fs0/chenr6/Database_fs0/MGI/processing/term.gene/MP:0003050 (11)	MP:0003050	1	0.5	106	1	1.05	106	1	0	106	MP:0003050	abnormal sacral vertebrae morphology
/fs0/chenr6/Database_fs0/MGI/processing/term.gene/MP:0003054 (6)	MP:0003054	1	1	54	1	0	54	1	1.63	54	MP:0003054	spina bifida
/fs0/chenr6/Database_fs0/MGI/processing/term.gene/MP:0003055 (13)	MP:0003055	1	1.5	136	1	0	136	1	3.69	136	MP:0003055	abnormal long bone epiphyseal plate morphology
/fs0/chenr6/Database_fs0/MGI/processing/term.gene/MP:0003059 (11)	MP:0003059	1	0.5	87	1	1.31	87	1	0	87	MP:0003059	decreased insulin secretion
/fs0/chenr6/Database_fs0/MGI/processing/term.gene/MP:0003068 (12)	MP:0003068	1	1.67	88	1	1.31	88	1	1.63	88	MP:0003068	enlarged kidney
/fs0/chenr6/Database_fs0/MGI/processing/term.gene/MP:0003075 (4)	MP:0003075	1	1.67	67	1	0	67	1	2.44	67	MP:0003075	altered response to CNS ischemic injury
/fs0/chenr6/Database_fs0/MGI/processing/term.gene/MP:0003077 (17)	MP:0003077	1	3.55	204	1	3.55	204	1	3.69	204	MP:0003077	abnormal cell cycle
/fs0/chenr6/Database_fs0/MGI/processing/term.gene/MP:0003079 (2)	MP:0003079	1	Inf	54	1	Inf	54	1	9.81	54	MP:0003079	decreased susceptibility to induced joint inflammation
/fs0/chenr6/Database_fs0/MGI/processing/term.gene/MP:0003088 (19)	MP:0003088	1	2.95	163	1	3.98	163	1	2.47	163	MP:0003088	abnormal prepulse inhibition
/fs0/chenr6/Database_fs0/MGI/processing/term.gene/MP:0003107 (19)	MP:0003107	1	3.7	232	1	13.47	232	1	1.97	232	MP:0003107	abnormal response to novelty
/fs0/chenr6/Database_fs0/MGI/processing/term.gene/MP:0003109 (7)	MP:0003109	1	3.77	86	1	5.28	86	1	2.44	86	MP:0003109	short femur
/fs0/chenr6/Database_fs0/MGI/processing/term.gene/MP:0003111 (11)	MP:0003111	1	2.87	126	1	2.64	126	1	3.27	126	MP:0003111	abnormal cell nucleus morphology
/fs0/chenr6/Database_fs0/MGI/processing/term.gene/MP:0003115 (14)	MP:0003115	1	5.08	131	1	10.7	131	1	4.95	131	MP:0003115	abnormal respiratory system development
/fs0/chenr6/Database_fs0/MGI/processing/term.gene/MP:0003119 (3)	MP:0003119	1	2.5	66	1	5.25	66	1	4.88	66	MP:0003119	abnormal digestive system development
/fs0/chenr6/Database_fs0/MGI/processing/term.gene/MP:0003131 (8)	MP:0003131	1	5.04	63	1	2.62	63	1	14.79	63	MP:0003131	increased erythrocyte cell number
/fs0/chenr6/Database_fs0/MGI/processing/term.gene/MP:0003137 (17)	MP:0003137	1	2.1	153	1	2.64	153	1	1.84	153	MP:0003137	abnormal impulse conducting system conduction
/fs0/chenr6/Database_fs0/MGI/processing/term.gene/MP:0003141 (11)	MP:0003141	1	6.08	108	1	Inf	108	1	2.46	108	MP:0003141	cardiac fibrosis
/fs0/chenr6/Database_fs0/MGI/processing/term.gene/MP:0003156 (10)	MP:0003156	1	7.6	132	1	5.31	132	1	14.79	132	MP:0003156	abnormal leukocyte migration
/fs0/chenr6/Database_fs0/MGI/processing/term.gene/MP:0003169 (9)	MP:0003169	1	4.03	193	1	5.28	193	1	1.96	193	MP:0003169	abnormal scala media morphology
/fs0/chenr6/Database_fs0/MGI/processing/term.gene/MP:0003179 (12)	MP:0003179	1	0.45	144	1	1.75	144	1	0	144	MP:0003179	thrombocytopenia
/fs0/chenr6/Database_fs0/MGI/processing/term.gene/MP:0003186 (11)	MP:0003186	1	1.88	104	1	15.94	104	1	0	104	MP:0003186	abnormal redox activity
/fs0/chenr6/Database_fs0/MGI/processing/term.gene/MP:0003189 (7)	MP:0003189	1	0	111	1	0	111	1	0	111	MP:0003189	fused joints
/fs0/chenr6/Database_fs0/MGI/processing/term.gene/MP:0003202 (13)	MP:0003202	1	3.15	176	1	2.11	176	1	4.93	176	MP:0003202	abnormal neuron apoptosis
/fs0/chenr6/Database_fs0/MGI/processing/term.gene/MP:0003203 (9)	MP:0003203	1	4.03	110	1	3.52	110	1	4.9	110	MP:0003203	increased neuron apoptosis
/fs0/chenr6/Database_fs0/MGI/processing/term.gene/MP:0003204 (4)	MP:0003204	1	1.67	65	1	0	65	1	4.88	65	MP:0003204	decreased neuron apoptosis
/fs0/chenr6/Database_fs0/MGI/processing/term.gene/MP:0003224 (19)	MP:0003224	1	2.95	280	1	2.64	280	1	3.1	280	MP:0003224	neuron degeneration
/fs0/chenr6/Database_fs0/MGI/processing/term.gene/MP:0003229 (18)	MP:0003229	1	5.11	156	1	4.27	156	1	6.22	156	MP:0003229	abnormal vitelline vasculature morphology
/fs0/chenr6/Database_fs0/MGI/processing/term.gene/MP:0003231 (9)	MP:0003231	1	6.32	106	1	3.52	106	1	14.79	106	MP:0003231	abnormal placenta vasculature
/fs0/chenr6/Database_fs0/MGI/processing/term.gene/MP:0003257 (7)	MP:0003257	1	2	65	1	0	65	1	3.27	65	MP:0003257	abnormal abdominal wall morphology
/fs0/chenr6/Database_fs0/MGI/processing/term.gene/MP:0003304 (6)	MP:0003304	1	0	125	1	0	125	1	0	125	MP:0003304	large intestinal inflammation
/fs0/chenr6/Database_fs0/MGI/processing/term.gene/MP:0003308 (7)	MP:0003308	1	3.77	167	1	5.28	167	1	1.22	167	MP:0003308	abnormal cochlear sensory epithelium morphology
/fs0/chenr6/Database_fs0/MGI/processing/term.gene/MP:0003312 (35)	MP:0003312	1	3.44	491	1	4.76	491	1	3.09	491	MP:0003312	abnormal locomotor coordination
/fs0/chenr6/Database_fs0/MGI/processing/term.gene/MP:0003331 (6)	MP:0003331	1	10.08	58	1	15.94	58	1	4.88	58	MP:0003331	increased hepatocellular carcinoma incidence
/fs0/chenr6/Database_fs0/MGI/processing/term.gene/MP:0003345 (14)	MP:0003345	1	0	97	1	0	97	1	0	97	MP:0003345	decreased rib number
/fs0/chenr6/Database_fs0/MGI/processing/term.gene/MP:0003354 (5)	MP:0003354	1	1.25	73	1	5.25	73	1	0	73	MP:0003354	astrocytosis
/fs0/chenr6/Database_fs0/MGI/processing/term.gene/MP:0003358 (11)	MP:0003358	1	6.08	110	1	5.31	110	1	6.6	110	MP:0003358	abnormal hypaxial muscle morphology
/fs0/chenr6/Database_fs0/MGI/processing/term.gene/MP:0003360 (14)	MP:0003360	1	6.8	107	1	10.7	107	1	4.95	107	MP:0003360	abnormal depression-related behavior
/fs0/chenr6/Database_fs0/MGI/processing/term.gene/MP:0003361 (14)	MP:0003361	1	2.8	84	1	1.75	84	1	3.29	84	MP:0003361	abnormal circulating gonadotropin level
/fs0/chenr6/Database_fs0/MGI/processing/term.gene/MP:0003366 (11)	MP:0003366	1	1.11	74	1	1.31	74	1	0.81	74	MP:0003366	abnormal circulating glucocorticoid level
/fs0/chenr6/Database_fs0/MGI/processing/term.gene/MP:0003385 (9)	MP:0003385	1	2.51	87	1	0	87	1	4.93	87	MP:0003385	abnormal body wall morphology
/fs0/chenr6/Database_fs0/MGI/processing/term.gene/MP:0003396 (3)	MP:0003396	1	Inf	52	1	0	52	1	Inf	52	MP:0003396	abnormal embryonic hematopoiesis
/fs0/chenr6/Database_fs0/MGI/processing/term.gene/MP:0003400 (5)	MP:0003400	1	3.34	52	1	2.62	52	1	4.88	52	MP:0003400	kinked neural tube
/fs0/chenr6/Database_fs0/MGI/processing/term.gene/MP:0003402 (11)	MP:0003402	1	1.11	70	1	1.75	70	1	0.81	70	MP:0003402	decreased liver weight
/fs0/chenr6/Database_fs0/MGI/processing/term.gene/MP:0003436 (2)	MP:0003436	1	Inf	54	1	Inf	54	1	9.81	54	MP:0003436	decreased susceptibility to induced arthritis
/fs0/chenr6/Database_fs0/MGI/processing/term.gene/MP:0003447 (6)	MP:0003447	1	5.02	51	1	2.62	51	1	9.81	51	MP:0003447	decreased tumor growth/size
/fs0/chenr6/Database_fs0/MGI/processing/term.gene/MP:0003448 (10)	MP:0003448	1	5.05	96	1	3.98	96	1	9.81	96	MP:0003448	abnormal tumor morphology
/fs0/chenr6/Database_fs0/MGI/processing/term.gene/MP:0003453 (3)	MP:0003453	1	10.02	61	1	5.25	61	1	Inf	61	MP:0003453	abnormal keratinocyte physiology
/fs0/chenr6/Database_fs0/MGI/processing/term.gene/MP:0003461 (4)	MP:0003461	1	1.67	51	1	Inf	51	1	0	51	MP:0003461	abnormal response to novel object
/fs0/chenr6/Database_fs0/MGI/processing/term.gene/MP:0003562 (16)	MP:0003562	1	0.71	140	1	1.31	140	1	0.44	140	MP:0003562	abnormal pancreatic beta cell physiology
/fs0/chenr6/Database_fs0/MGI/processing/term.gene/MP:0003564 (14)	MP:0003564	1	0.83	121	1	1.31	121	1	0.54	121	MP:0003564	abnormal insulin secretion
/fs0/chenr6/Database_fs0/MGI/processing/term.gene/MP:0003566 (4)	MP:0003566	1	15.08	53	1	Inf	53	1	0	53	MP:0003566	abnormal cell adhesion
/fs0/chenr6/Database_fs0/MGI/processing/term.gene/MP:0003634 (22)	MP:0003634	1	3.53	269	1	8.13	269	1	1.63	269	MP:0003634	abnormal glial cell morphology
/fs0/chenr6/Database_fs0/MGI/processing/term.gene/MP:0003638 (6)	MP:0003638	1	5.02	89	1	0	89	1	14.79	89	MP:0003638	abnormal response/metabolism to endogenous compounds
/fs0/chenr6/Database_fs0/MGI/processing/term.gene/MP:0003641 (12)	MP:0003641	1	7.12	95	1	7.97	95	1	8.3	95	MP:0003641	small lung
/fs0/chenr6/Database_fs0/MGI/processing/term.gene/MP:0003651 (7)	MP:0003651	1	6.72	55	1	2.62	55	1	14.79	55	MP:0003651	abnormal axon extension
/fs0/chenr6/Database_fs0/MGI/processing/term.gene/MP:0003658 (6)	MP:0003658	1	10.08	74	1	Inf	74	1	4.9	74	MP:0003658	abnormal capillary morphology
/fs0/chenr6/Database_fs0/MGI/processing/term.gene/MP:0003662 (4)	MP:0003662	1	1.67	52	1	0	52	1	4.88	52	MP:0003662	abnormal long bone epiphyseal plate proliferative zone
/fs0/chenr6/Database_fs0/MGI/processing/term.gene/MP:0003674 (8)	MP:0003674	1	1.67	92	1	10.55	92	1	0	92	MP:0003674	oxidative stress
/fs0/chenr6/Database_fs0/MGI/processing/term.gene/MP:0003675 (9)	MP:0003675	1	4.03	120	1	2.62	120	1	4.93	120	MP:0003675	kidney cysts
/fs0/chenr6/Database_fs0/MGI/processing/term.gene/MP:0003690 (7)	MP:0003690	1	3.77	72	1	10.55	72	1	3.27	72	MP:0003690	abnormal glial cell physiology
/fs0/chenr6/Database_fs0/MGI/processing/term.gene/MP:0003698 (69)	MP:0003698	1	1.17	748	1	0.65	748	1	1.55	748	MP:0003698	abnormal male reproductive system physiology
/fs0/chenr6/Database_fs0/MGI/processing/term.gene/MP:0003699 (43)	MP:0003699	1	2.48	572	1	0.69	572	1	4.1	572	MP:0003699	abnormal female reproductive system physiology
/fs0/chenr6/Database_fs0/MGI/processing/term.gene/MP:0003705 (10)	MP:0003705	1	0.55	101	1	0	101	1	1.22	101	MP:0003705	abnormal hypodermis morphology
/fs0/chenr6/Database_fs0/MGI/processing/term.gene/MP:0003711 (5)	MP:0003711	1	1.25	76	1	5.25	76	1	0	76	MP:0003711	pathological neovascularization
/fs0/chenr6/Database_fs0/MGI/processing/term.gene/MP:0003717 (15)	MP:0003717	1	5.82	173	1	7.97	173	1	4.97	173	MP:0003717	pallor
/fs0/chenr6/Database_fs0/MGI/processing/term.gene/MP:0003718 (7)	MP:0003718	1	2	59	1	1.31	59	1	4.88	59	MP:0003718	maternal effect
/fs0/chenr6/Database_fs0/MGI/processing/term.gene/MP:0003720 (25)	MP:0003720	1	3.4	269	1	4.48	269	1	2.75	269	MP:0003720	abnormal neural tube closure
/fs0/chenr6/Database_fs0/MGI/processing/term.gene/MP:0003723 (40)	MP:0003723	1	2.18	456	1	2.97	456	1	2.35	456	MP:0003723	abnormal long bone morphology
/fs0/chenr6/Database_fs0/MGI/processing/term.gene/MP:0003725 (15)	MP:0003725	1	2.52	96	1	1.31	96	1	3.29	96	MP:0003725	increased autoantibody level
/fs0/chenr6/Database_fs0/MGI/processing/term.gene/MP:0003728 (11)	MP:0003728	1	1.88	153	1	2.64	153	1	1.22	153	MP:0003728	abnormal retinal photoreceptor layer morphology
/fs0/chenr6/Database_fs0/MGI/processing/term.gene/MP:0003729 (7)	MP:0003729	1	2	101	1	2.62	101	1	1.63	101	MP:0003729	abnormal photoreceptor outer segment morphology
/fs0/chenr6/Database_fs0/MGI/processing/term.gene/MP:0003731 (10)	MP:0003731	1	2.15	116	1	3.52	116	1	1.22	116	MP:0003731	abnormal retinal outer nuclear layer morphology
/fs0/chenr6/Database_fs0/MGI/processing/term.gene/MP:0003733 (2)	MP:0003733	1	5	57	1	0	57	1	4.88	57	MP:0003733	abnormal retinal inner nuclear layer morphology
/fs0/chenr6/Database_fs0/MGI/processing/term.gene/MP:0003755 (24)	MP:0003755	1	3.65	221	1	6.73	221	1	3.74	221	MP:0003755	abnormal palate morphology
/fs0/chenr6/Database_fs0/MGI/processing/term.gene/MP:0003756 (11)	MP:0003756	1	6.08	95	0.9	26.95	95	1	4.9	95	MP:0003756	abnormal hard palate morphology
/fs0/chenr6/Database_fs0/MGI/processing/term.gene/MP:0003762 (15)	MP:0003762	1	3.37	131	1	2.27	131	1	7.39	131	MP:0003762	abnormal immune organ physiology
/fs0/chenr6/Database_fs0/MGI/processing/term.gene/MP:0003763 (8)	MP:0003763	1	8.42	75	1	3.52	75	1	Inf	75	MP:0003763	abnormal thymus physiology
/fs0/chenr6/Database_fs0/MGI/processing/term.gene/MP:0003795 (68)	MP:0003795	1	2.15	736	1	2.63	736	1	2	736	MP:0003795	abnormal bone structure
/fs0/chenr6/Database_fs0/MGI/processing/term.gene/MP:0003797 (6)	MP:0003797	1	1	136	1	2.62	136	1	0	136	MP:0003797	abnormal compact bone morphology
/fs0/chenr6/Database_fs0/MGI/processing/term.gene/MP:0003809 (8)	MP:0003809	1	0.71	58	1	2.62	58	1	1.22	58	MP:0003809	abnormal hair shaft morphology
/fs0/chenr6/Database_fs0/MGI/processing/term.gene/MP:0003854 (7)	MP:0003854	1	6.72	76	1	Inf	76	1	3.27	76	MP:0003854	abnormal forelimb stylopod morphology
/fs0/chenr6/Database_fs0/MGI/processing/term.gene/MP:0003855 (7)	MP:0003855	1	12.64	88	1	Inf	88	1	9.91	88	MP:0003855	abnormal forelimb zeugopod morphology
/fs0/chenr6/Database_fs0/MGI/processing/term.gene/MP:0003856 (11)	MP:0003856	1	1.88	144	1	3.52	144	1	0.97	144	MP:0003856	abnormal hindlimb stylopod morphology
/fs0/chenr6/Database_fs0/MGI/processing/term.gene/MP:0003857 (21)	MP:0003857	1	0.83	208	1	0.87	208	1	0.88	208	MP:0003857	abnormal hindlimb zeugopod morphology
/fs0/chenr6/Database_fs0/MGI/processing/term.gene/MP:0003866 (5)	MP:0003866	1	3.34	58	1	0	58	1	4.9	58	MP:0003866	abnormal defecation
/fs0/chenr6/Database_fs0/MGI/processing/term.gene/MP:0003871 (0)	MP:0003871	1	0	52	1	0	52	1	0	52	MP:0003871	abnormal myelin sheath morphology
/fs0/chenr6/Database_fs0/MGI/processing/term.gene/MP:0003881 (35)	MP:0003881	1	3.03	348	1	2.27	348	1	3.62	348	MP:0003881	abnormal nephron morphology
/fs0/chenr6/Database_fs0/MGI/processing/term.gene/MP:0003884 (2)	MP:0003884	1	5	86	1	0	86	1	4.88	86	MP:0003884	decreased macrophage cell number
/fs0/chenr6/Database_fs0/MGI/processing/term.gene/MP:0003886 (3)	MP:0003886	1	2.5	56	1	2.62	56	1	0	56	MP:0003886	abnormal embryonic epiblast morphology
/fs0/chenr6/Database_fs0/MGI/processing/term.gene/MP:0003898 (5)	MP:0003898	1	1.25	60	1	0	60	1	4.88	60	MP:0003898	abnormal QRS complex
/fs0/chenr6/Database_fs0/MGI/processing/term.gene/MP:0003918 (6)	MP:0003918	1	5.02	52	1	5.25	52	1	7.39	52	MP:0003918	decreased kidney weight
/fs0/chenr6/Database_fs0/MGI/processing/term.gene/MP:0003920 (14)	MP:0003920	1	6.8	135	1	10.7	135	1	3.96	135	MP:0003920	abnormal heart right ventricle morphology
/fs0/chenr6/Database_fs0/MGI/processing/term.gene/MP:0003925 (4)	MP:0003925	1	Inf	53	1	Inf	53	1	Inf	53	MP:0003925	abnormal cellular glucose uptake
/fs0/chenr6/Database_fs0/MGI/processing/term.gene/MP:0003936 (6)	MP:0003936	1	1	71	1	0	71	1	0.97	71	MP:0003936	abnormal reproductive system development
/fs0/chenr6/Database_fs0/MGI/processing/term.gene/MP:0003938 (5)	MP:0003938	1	3.34	53	1	Inf	53	1	1.22	53	MP:0003938	abnormal ear development
/fs0/chenr6/Database_fs0/MGI/processing/term.gene/MP:0003942 (5)	MP:0003942	1	7.54	96	1	10.55	96	1	9.81	96	MP:0003942	abnormal urinary system development
/fs0/chenr6/Database_fs0/MGI/processing/term.gene/MP:0003943 (2)	MP:0003943	1	5	59	1	0	59	1	4.88	59	MP:0003943	abnormal hepatobiliary system development
/fs0/chenr6/Database_fs0/MGI/processing/term.gene/MP:0003947 (43)	MP:0003947	1	1.97	462	1	1.68	462	1	2.67	462	MP:0003947	abnormal cholesterol level
/fs0/chenr6/Database_fs0/MGI/processing/term.gene/MP:0003948 (52)	MP:0003948	1	2.28	429	1	2.73	429	1	1.93	429	MP:0003948	abnormal gas homeostasis
/fs0/chenr6/Database_fs0/MGI/processing/term.gene/MP:0003949 (72)	MP:0003949	1	1.45	739	1	1.33	739	1	1.78	739	MP:0003949	abnormal circulating lipid level
/fs0/chenr6/Database_fs0/MGI/processing/term.gene/MP:0003953 (85)	MP:0003953	1	2.04	820	1	1.87	820	1	2.38	820	MP:0003953	abnormal hormone level
/fs0/chenr6/Database_fs0/MGI/processing/term.gene/MP:0003959 (36)	MP:0003959	1	1	341	1	0.92	341	1	1.64	341	MP:0003959	abnormal lean body mass
/fs0/chenr6/Database_fs0/MGI/processing/term.gene/MP:0003960 (13)	MP:0003960	1	1.5	133	1	2.11	133	1	1.96	133	MP:0003960	increased lean body mass
/fs0/chenr6/Database_fs0/MGI/processing/term.gene/MP:0003961 (27)	MP:0003961	1	1.14	233	1	1.21	233	1	1.84	233	MP:0003961	decreased lean body mass
/fs0/chenr6/Database_fs0/MGI/processing/term.gene/MP:0003963 (10)	MP:0003963	1	1.25	77	1	1.31	77	1	0.97	77	MP:0003963	abnormal corticosterone level
/fs0/chenr6/Database_fs0/MGI/processing/term.gene/MP:0003965 (23)	MP:0003965	1	1.78	174	1	0.75	174	1	2.47	174	MP:0003965	abnormal pituitary hormone level
/fs0/chenr6/Database_fs0/MGI/processing/term.gene/MP:0003967 (9)	MP:0003967	1	1.43	68	1	0	68	1	1.96	68	MP:0003967	abnormal follicle stimulating hormone level
/fs0/chenr6/Database_fs0/MGI/processing/term.gene/MP:0003969 (6)	MP:0003969	1	1	51	1	0	51	1	1.63	51	MP:0003969	abnormal luteinizing hormone level
/fs0/chenr6/Database_fs0/MGI/processing/term.gene/MP:0003972 (11)	MP:0003972	1	1.11	94	1	0	94	1	1.63	94	MP:0003972	decreased pituitary hormone level
/fs0/chenr6/Database_fs0/MGI/processing/term.gene/MP:0003973 (16)	MP:0003973	1	1.67	98	1	0.87	98	1	2.46	98	MP:0003973	increased pituitary hormone level
/fs0/chenr6/Database_fs0/MGI/processing/term.gene/MP:0003982 (23)	MP:0003982	1	1.78	240	1	2.67	240	1	1.22	240	MP:0003982	increased cholesterol level
/fs0/chenr6/Database_fs0/MGI/processing/term.gene/MP:0003983 (23)	MP:0003983	1	2.21	262	1	0.95	262	1	4.28	262	MP:0003983	decreased cholesterol level
/fs0/chenr6/Database_fs0/MGI/processing/term.gene/MP:0003985 (9)	MP:0003985	1	1.43	56	1	0	56	1	1.96	56	MP:0003985	renal fibrosis
/fs0/chenr6/Database_fs0/MGI/processing/term.gene/MP:0003997 (0)	MP:0003997	1	0	51	1	0	51	1	0	51	MP:0003997	tonic-clonic seizures
/fs0/chenr6/Database_fs0/MGI/processing/term.gene/MP:0004007 (4)	MP:0004007	1	5.01	71	1	Inf	71	1	2.44	71	MP:0004007	abnormal lung vasculature morphology
/fs0/chenr6/Database_fs0/MGI/processing/term.gene/MP:0004016 (6)	MP:0004016	1	0	78	1	0	78	1	0	78	MP:0004016	decreased bone mass
/fs0/chenr6/Database_fs0/MGI/processing/term.gene/MP:0004019 (5)	MP:0004019	1	3.34	52	1	0	52	1	3.27	52	MP:0004019	abnormal vitamin homeostasis
/fs0/chenr6/Database_fs0/MGI/processing/term.gene/MP:0004021 (9)	MP:0004021	1	2.51	86	1	1.75	86	1	3.27	86	MP:0004021	abnormal rod electrophysiology
/fs0/chenr6/Database_fs0/MGI/processing/term.gene/MP:0004022 (7)	MP:0004022	1	2	72	1	0	72	1	4.9	72	MP:0004022	abnormal cone electrophysiology
/fs0/chenr6/Database_fs0/MGI/processing/term.gene/MP:0004023 (6)	MP:0004023	1	2.5	58	1	3.52	58	1	0	58	MP:0004023	abnormal chromosome number
/fs0/chenr6/Database_fs0/MGI/processing/term.gene/MP:0004028 (4)	MP:0004028	1	1.67	52	1	2.62	52	1	0	52	MP:0004028	chromosome breakage
/fs0/chenr6/Database_fs0/MGI/processing/term.gene/MP:0004046 (11)	MP:0004046	1	4.21	90	1	3.98	90	1	4.9	90	MP:0004046	abnormal mitosis
/fs0/chenr6/Database_fs0/MGI/processing/term.gene/MP:0004066 (5)	MP:0004066	1	0	59	1	0	59	1	0	59	MP:0004066	abnormal primitive node morphology
/fs0/chenr6/Database_fs0/MGI/processing/term.gene/MP:0004076 (9)	MP:0004076	1	6.32	59	1	0	59	1	24.91	59	MP:0004076	abnormal vitelline vascular remodeling
/fs0/chenr6/Database_fs0/MGI/processing/term.gene/MP:0004077 (7)	MP:0004077	1	6.72	54	1	5.28	54	1	9.81	54	MP:0004077	abnormal striatum morphology
/fs0/chenr6/Database_fs0/MGI/processing/term.gene/MP:0004085 (22)	MP:0004085	1	2.9	231	1	8.13	231	1	0.88	231	MP:0004085	abnormal heartbeat
/fs0/chenr6/Database_fs0/MGI/processing/term.gene/MP:0004113 (11)	MP:0004113	1	6.08	82	1	10.7	82	1	2.45	82	MP:0004113	abnormal aortic arch morphology
/fs0/chenr6/Database_fs0/MGI/processing/term.gene/MP:0004129 (12)	MP:0004129	1	0	93	1	0	93	1	0	93	MP:0004129	abnormal respiratory quotient
/fs0/chenr6/Database_fs0/MGI/processing/term.gene/MP:0004133 (10)	MP:0004133	1	1.25	70	1	1.31	70	1	1.22	70	MP:0004133	heterotaxia
/fs0/chenr6/Database_fs0/MGI/processing/term.gene/MP:0004142 (4)	MP:0004142	1	15.08	51	1	5.25	51	1	Inf	51	MP:0004142	abnormal muscle tone
/fs0/chenr6/Database_fs0/MGI/processing/term.gene/MP:0004152 (2)	MP:0004152	1	Inf	65	1	Inf	65	1	Inf	65	MP:0004152	abnormal circulating iron level
/fs0/chenr6/Database_fs0/MGI/processing/term.gene/MP:0004163 (7)	MP:0004163	1	3.77	65	1	Inf	65	1	2.45	65	MP:0004163	abnormal adenohypophysis morphology
/fs0/chenr6/Database_fs0/MGI/processing/term.gene/MP:0004173 (4)	MP:0004173	1	5.01	59	1	5.25	59	1	4.88	59	MP:0004173	abnormal intervertebral disk morphology
/fs0/chenr6/Database_fs0/MGI/processing/term.gene/MP:0004174 (26)	MP:0004174	1	3.19	216	1	3.23	216	1	3.29	216	MP:0004174	abnormal spine curvature
/fs0/chenr6/Database_fs0/MGI/processing/term.gene/MP:0004194 (12)	MP:0004194	1	2.51	100	1	3.98	100	1	2.45	100	MP:0004194	abnormal kidney pelvis morphology
/fs0/chenr6/Database_fs0/MGI/processing/term.gene/MP:0004201 (5)	MP:0004201	1	7.54	76	1	10.55	76	1	4.88	76	MP:0004201	fetal growth retardation
/fs0/chenr6/Database_fs0/MGI/processing/term.gene/MP:0004215 (11)	MP:0004215	1	4.21	96	1	3.52	96	1	3.69	96	MP:0004215	abnormal myocardial fiber physiology
/fs0/chenr6/Database_fs0/MGI/processing/term.gene/MP:0004227 (0)	MP:0004227	1	0	65	1	0	65	1	0	65	MP:0004227	increased cellular sensitivity to ionizing radiation
/fs0/chenr6/Database_fs0/MGI/processing/term.gene/MP:0004231 (13)	MP:0004231	1	3.15	160	1	15.94	160	1	1.4	160	MP:0004231	abnormal calcium ion homeostasis
/fs0/chenr6/Database_fs0/MGI/processing/term.gene/MP:0004255 (3)	MP:0004255	1	10.02	54	1	Inf	54	1	4.88	54	MP:0004255	abnormal spongiotrophoblast layer morphology
/fs0/chenr6/Database_fs0/MGI/processing/term.gene/MP:0004258 (3)	MP:0004258	1	10.02	79	1	Inf	79	1	0	79	MP:0004258	abnormal placenta size
/fs0/chenr6/Database_fs0/MGI/processing/term.gene/MP:0004259 (3)	MP:0004259	1	10.02	57	1	Inf	57	1	0	57	MP:0004259	small placenta
/fs0/chenr6/Database_fs0/MGI/processing/term.gene/MP:0004261 (8)	MP:0004261	1	3.01	88	1	10.55	88	1	1.22	88	MP:0004261	abnormal embryonic neuroepithelium morphology
/fs0/chenr6/Database_fs0/MGI/processing/term.gene/MP:0004262 (38)	MP:0004262	1	1.34	401	1	1.47	401	1	1.9	401	MP:0004262	abnormal physical strength
/fs0/chenr6/Database_fs0/MGI/processing/term.gene/MP:0004362 (3)	MP:0004362	1	2.5	83	1	0	83	1	4.88	83	MP:0004362	cochlear hair cell degeneration
/fs0/chenr6/Database_fs0/MGI/processing/term.gene/MP:0004391 (10)	MP:0004391	1	5.05	66	1	10.55	66	1	4.95	66	MP:0004391	abnormal respiratory conducting tube morphology
/fs0/chenr6/Database_fs0/MGI/processing/term.gene/MP:0004392 (9)	MP:0004392	1	2.51	85	1	1.05	85	1	9.81	85	MP:0004392	abnormal CD8-positive, alpha-beta T cell physiology
/fs0/chenr6/Database_fs0/MGI/processing/term.gene/MP:0004393 (3)	MP:0004393	1	2.5	102	1	5.25	102	1	0	102	MP:0004393	abnormal cochlear inner hair cell morphology
/fs0/chenr6/Database_fs0/MGI/processing/term.gene/MP:0004398 (2)	MP:0004398	1	0	51	1	0	51	1	0	51	MP:0004398	cochlear inner hair cell degeneration
/fs0/chenr6/Database_fs0/MGI/processing/term.gene/MP:0004399 (5)	MP:0004399	1	3.34	128	1	2.62	128	1	1.63	128	MP:0004399	abnormal cochlear outer hair cell morphology
/fs0/chenr6/Database_fs0/MGI/processing/term.gene/MP:0004404 (2)	MP:0004404	1	0	71	1	0	71	1	0	71	MP:0004404	cochlear outer hair cell degeneration
/fs0/chenr6/Database_fs0/MGI/processing/term.gene/MP:0004406 (3)	MP:0004406	1	10.02	55	1	10.55	55	1	0	55	MP:0004406	abnormal cochlear hair cell number
/fs0/chenr6/Database_fs0/MGI/processing/term.gene/MP:0004426 (9)	MP:0004426	1	4.03	193	1	5.28	193	1	1.96	193	MP:0004426	abnormal cochlear labyrinth morphology
/fs0/chenr6/Database_fs0/MGI/processing/term.gene/MP:0004427 (5)	MP:0004427	1	3.34	70	1	Inf	70	1	3.27	70	MP:0004427	abnormal vestibular labyrinth morphology
/fs0/chenr6/Database_fs0/MGI/processing/term.gene/MP:0004484 (3)	MP:0004484	1	Inf	72	1	Inf	72	1	0	72	MP:0004484	altered response of heart to induced stress
/fs0/chenr6/Database_fs0/MGI/processing/term.gene/MP:0004499 (9)	MP:0004499	1	6.32	88	1	7.13	88	1	4.88	88	MP:0004499	increased incidence of tumors by chemical induction
/fs0/chenr6/Database_fs0/MGI/processing/term.gene/MP:0004502 (6)	MP:0004502	1	2.5	64	1	2.62	64	1	2.44	64	MP:0004502	decreased incidence of tumors by chemical induction
/fs0/chenr6/Database_fs0/MGI/processing/term.gene/MP:0004508 (14)	MP:0004508	1	6.8	201	1	5.31	201	1	7.5	201	MP:0004508	abnormal pectoral girdle bone morphology
/fs0/chenr6/Database_fs0/MGI/processing/term.gene/MP:0004509 (7)	MP:0004509	1	3.77	58	1	5.28	58	1	4.9	58	MP:0004509	abnormal pelvic girdle bone morphology
/fs0/chenr6/Database_fs0/MGI/processing/term.gene/MP:0004521 (2)	MP:0004521	1	0	72	1	0	72	1	0	72	MP:0004521	abnormal cochlear hair cell stereociliary bundle morphology
/fs0/chenr6/Database_fs0/MGI/processing/term.gene/MP:0004527 (0)	MP:0004527	1	0	52	1	0	52	1	0	52	MP:0004527	abnormal outer hair cell stereociliary bundle morphology
/fs0/chenr6/Database_fs0/MGI/processing/term.gene/MP:0004543 (16)	MP:0004543	1	1.15	193	1	0	193	1	1.47	193	MP:0004543	abnormal sperm physiology
/fs0/chenr6/Database_fs0/MGI/processing/term.gene/MP:0004592 (6)	MP:0004592	1	25.28	91	1	Inf	91	1	9.81	91	MP:0004592	small mandible
/fs0/chenr6/Database_fs0/MGI/processing/term.gene/MP:0004599 (8)	MP:0004599	1	0.71	82	1	0	82	1	1.22	82	MP:0004599	abnormal vertebral arch morphology
/fs0/chenr6/Database_fs0/MGI/processing/term.gene/MP:0004609 (7)	MP:0004609	1	0	103	1	0	103	1	0	103	MP:0004609	vertebral fusion
/fs0/chenr6/Database_fs0/MGI/processing/term.gene/MP:0004624 (34)	MP:0004624	1	1.55	399	1	1.76	399	1	1.36	399	MP:0004624	abnormal thoracic cage morphology
/fs0/chenr6/Database_fs0/MGI/processing/term.gene/MP:0004625 (2)	MP:0004625	1	0	69	1	0	69	1	0	69	MP:0004625	abnormal rib joint morphology
/fs0/chenr6/Database_fs0/MGI/processing/term.gene/MP:0004643 (15)	MP:0004643	1	0.77	176	1	1.31	176	1	0	176	MP:0004643	abnormal vertebrae number
/fs0/chenr6/Database_fs0/MGI/processing/term.gene/MP:0004644 (9)	MP:0004644	1	0	92	1	0	92	1	0	92	MP:0004644	increased vertebrae number
/fs0/chenr6/Database_fs0/MGI/processing/term.gene/MP:0004645 (13)	MP:0004645	1	0.91	147	1	1.5	147	1	0	147	MP:0004645	decreased vertebrae number
/fs0/chenr6/Database_fs0/MGI/processing/term.gene/MP:0004647 (8)	MP:0004647	1	0.71	75	1	1.31	75	1	0	75	MP:0004647	decreased lumbar vertebrae number
/fs0/chenr6/Database_fs0/MGI/processing/term.gene/MP:0004686 (24)	MP:0004686	1	2.08	260	1	3.18	260	1	1.79	260	MP:0004686	decreased length of long bones
/fs0/chenr6/Database_fs0/MGI/processing/term.gene/MP:0004700 (4)	MP:0004700	1	0	53	1	0	53	1	0	53	MP:0004700	abnormal circulating insulin-like growth factor I level
/fs0/chenr6/Database_fs0/MGI/processing/term.gene/MP:0004703 (65)	MP:0004703	1	2.3	631	1	2.9	631	1	1.73	631	MP:0004703	abnormal vertebral column morphology
/fs0/chenr6/Database_fs0/MGI/processing/term.gene/MP:0004720 (20)	MP:0004720	1	1.67	248	1	2.64	248	1	1.33	248	MP:0004720	abnormal platelet morphology
/fs0/chenr6/Database_fs0/MGI/processing/term.gene/MP:0004736 (3)	MP:0004736	1	2.5	59	1	5.25	59	1	0	59	MP:0004736	abnormal distortion product otoacoustic emission
/fs0/chenr6/Database_fs0/MGI/processing/term.gene/MP:0004753 (4)	MP:0004753	1	Inf	72	1	Inf	72	1	Inf	72	MP:0004753	abnormal miniature excitatory postsynaptic currents
/fs0/chenr6/Database_fs0/MGI/processing/term.gene/MP:0004756 (4)	MP:0004756	1	5.01	66	1	Inf	66	1	2.44	66	MP:0004756	abnormal proximal convoluted tubule morphology
/fs0/chenr6/Database_fs0/MGI/processing/term.gene/MP:0004762 (7)	MP:0004762	1	0.83	52	1	0	52	1	1.63	52	MP:0004762	increased anti-double stranded DNA antibody level
/fs0/chenr6/Database_fs0/MGI/processing/term.gene/MP:0004777 (3)	MP:0004777	1	2.5	50	1	Inf	50	1	0	50	MP:0004777	abnormal phospholipid level
/fs0/chenr6/Database_fs0/MGI/processing/term.gene/MP:0004787 (7)	MP:0004787	1	6.72	68	1	5.25	68	1	7.39	68	MP:0004787	abnormal dorsal aorta morphology
/fs0/chenr6/Database_fs0/MGI/processing/term.gene/MP:0004794 (15)	MP:0004794	1	2.52	81	1	1.31	81	1	3.29	81	MP:0004794	increased anti-nuclear antigen antibody level
/fs0/chenr6/Database_fs0/MGI/processing/term.gene/MP:0004799 (3)	MP:0004799	1	0	51	1	0	51	1	0	51	MP:0004799	increased susceptibility to experimental autoimmune encephalomyelitis
/fs0/chenr6/Database_fs0/MGI/processing/term.gene/MP:0004800 (4)	MP:0004800	1	1.67	67	1	0	67	1	Inf	67	MP:0004800	decreased susceptibility to experimental autoimmune encephalomyelitis
/fs0/chenr6/Database_fs0/MGI/processing/term.gene/MP:0004806 (17)	MP:0004806	1	1.54	166	1	0	166	1	2.47	166	MP:0004806	absent germ cells
/fs0/chenr6/Database_fs0/MGI/processing/term.gene/MP:0004808 (9)	MP:0004808	1	4.03	87	1	5.25	87	1	3.69	87	MP:0004808	abnormal hematopoietic stem cell morphology
/fs0/chenr6/Database_fs0/MGI/processing/term.gene/MP:0004816 (4)	MP:0004816	1	1.67	63	1	5.25	63	1	0	63	MP:0004816	abnormal class switch recombination
/fs0/chenr6/Database_fs0/MGI/processing/term.gene/MP:0004817 (15)	MP:0004817	1	5.82	110	1	5.34	110	1	4.95	110	MP:0004817	abnormal skeletal muscle mass
/fs0/chenr6/Database_fs0/MGI/processing/term.gene/MP:0004819 (14)	MP:0004819	1	5.08	98	1	5.34	98	1	3.69	98	MP:0004819	decreased skeletal muscle mass
/fs0/chenr6/Database_fs0/MGI/processing/term.gene/MP:0004847 (22)	MP:0004847	1	1.89	154	1	3.55	154	1	0.88	154	MP:0004847	abnormal liver weight
/fs0/chenr6/Database_fs0/MGI/processing/term.gene/MP:0004848 (35)	MP:0004848	1	3.03	329	1	3.23	329	1	2.69	329	MP:0004848	abnormal liver size
/fs0/chenr6/Database_fs0/MGI/processing/term.gene/MP:0004849 (48)	MP:0004849	1	1.32	429	1	0.92	429	1	1.73	429	MP:0004849	abnormal testis size
/fs0/chenr6/Database_fs0/MGI/processing/term.gene/MP:0004850 (22)	MP:0004850	1	1.48	224	1	0.87	224	1	1.79	224	MP:0004850	abnormal testis weight
/fs0/chenr6/Database_fs0/MGI/processing/term.gene/MP:0004852 (20)	MP:0004852	1	1.67	208	1	1.05	208	1	1.97	208	MP:0004852	decreased testis weight
/fs0/chenr6/Database_fs0/MGI/processing/term.gene/MP:0004853 (16)	MP:0004853	1	0.71	132	1	0	132	1	1.4	132	MP:0004853	abnormal ovary size
/fs0/chenr6/Database_fs0/MGI/processing/term.gene/MP:0004857 (19)	MP:0004857	1	4.59	216	1	4.48	216	1	3.96	216	MP:0004857	abnormal heart weight
/fs0/chenr6/Database_fs0/MGI/processing/term.gene/MP:0004859 (4)	MP:0004859	1	5.01	51	1	5.28	51	1	Inf	51	MP:0004859	abnormal synaptic plasticity
/fs0/chenr6/Database_fs0/MGI/processing/term.gene/MP:0004883 (5)	MP:0004883	1	3.34	54	1	10.55	54	1	0	54	MP:0004883	abnormal vascular wound healing
/fs0/chenr6/Database_fs0/MGI/processing/term.gene/MP:0004889 (9)	MP:0004889	1	1.43	121	1	1.31	121	1	1.63	121	MP:0004889	increased energy expenditure
/fs0/chenr6/Database_fs0/MGI/processing/term.gene/MP:0004890 (2)	MP:0004890	1	0	59	1	0	59	1	0	59	MP:0004890	decreased energy expenditure
/fs0/chenr6/Database_fs0/MGI/processing/term.gene/MP:0004891 (3)	MP:0004891	1	2.5	53	1	5.25	53	1	0	53	MP:0004891	abnormal adiponectin level
/fs0/chenr6/Database_fs0/MGI/processing/term.gene/MP:0004901 (39)	MP:0004901	1	0.91	346	1	0.4	346	1	1.22	346	MP:0004901	decreased male germ cell number
/fs0/chenr6/Database_fs0/MGI/processing/term.gene/MP:0004902 (11)	MP:0004902	1	1.88	75	1	0	75	1	2.95	75	MP:0004902	abnormal uterus size
/fs0/chenr6/Database_fs0/MGI/processing/term.gene/MP:0004907 (9)	MP:0004907	1	0	58	1	0	58	1	0	58	MP:0004907	abnormal seminal vesicle size
/fs0/chenr6/Database_fs0/MGI/processing/term.gene/MP:0004926 (9)	MP:0004926	1	2.51	66	1	0	66	1	4.93	66	MP:0004926	abnormal epididymis size
/fs0/chenr6/Database_fs0/MGI/processing/term.gene/MP:0004937 (16)	MP:0004937	1	5.09	158	1	7.97	158	1	3.1	158	MP:0004937	dilated heart
/fs0/chenr6/Database_fs0/MGI/processing/term.gene/MP:0004940 (10)	MP:0004940	1	3.35	76	1	5.28	76	1	2.45	76	MP:0004940	abnormal B-1 B cell morphology
/fs0/chenr6/Database_fs0/MGI/processing/term.gene/MP:0004941 (8)	MP:0004941	1	1.67	98	1	1.31	98	1	2.44	98	MP:0004941	abnormal regulatory T cell morphology
/fs0/chenr6/Database_fs0/MGI/processing/term.gene/MP:0004945 (3)	MP:0004945	1	2.5	58	1	0	58	1	4.88	58	MP:0004945	abnormal bone resorption
/fs0/chenr6/Database_fs0/MGI/processing/term.gene/MP:0004947 (4)	MP:0004947	1	15.08	81	1	5.25	81	1	Inf	81	MP:0004947	skin inflammation
/fs0/chenr6/Database_fs0/MGI/processing/term.gene/MP:0004948 (8)	MP:0004948	1	8.42	54	1	13.47	54	1	0	54	MP:0004948	abnormal neuronal precursor proliferation
/fs0/chenr6/Database_fs0/MGI/processing/term.gene/MP:0004951 (19)	MP:0004951	1	3.7	178	1	5.38	178	1	3.96	178	MP:0004951	abnormal spleen weight
/fs0/chenr6/Database_fs0/MGI/processing/term.gene/MP:0004952 (12)	MP:0004952	1	3.6	113	1	5.31	113	1	3.27	113	MP:0004952	increased spleen weight
/fs0/chenr6/Database_fs0/MGI/processing/term.gene/MP:0004953 (8)	MP:0004953	1	5.04	68	1	7.97	68	1	4.9	68	MP:0004953	decreased spleen weight
/fs0/chenr6/Database_fs0/MGI/processing/term.gene/MP:0004957 (17)	MP:0004957	1	4.52	178	1	3.55	178	1	6.6	178	MP:0004957	abnormal blastocyst morphology
/fs0/chenr6/Database_fs0/MGI/processing/term.gene/MP:0004966 (4)	MP:0004966	1	0	64	1	0	64	1	0	64	MP:0004966	abnormal inner cell mass proliferation
/fs0/chenr6/Database_fs0/MGI/processing/term.gene/MP:0004967 (5)	MP:0004967	1	7.54	50	1	10.55	50	1	4.88	50	MP:0004967	abnormal kidney epithelium morphology
/fs0/chenr6/Database_fs0/MGI/processing/term.gene/MP:0004972 (7)	MP:0004972	1	2	96	1	1.75	96	1	2.44	96	MP:0004972	abnormal regulatory T cell number
/fs0/chenr6/Database_fs0/MGI/processing/term.gene/MP:0004974 (5)	MP:0004974	1	3.34	60	1	1.75	60	1	Inf	60	MP:0004974	decreased regulatory T cell number
/fs0/chenr6/Database_fs0/MGI/processing/term.gene/MP:0004976 (10)	MP:0004976	1	3.35	75	1	5.28	75	1	2.45	75	MP:0004976	abnormal B-1 B cell number
/fs0/chenr6/Database_fs0/MGI/processing/term.gene/MP:0004978 (7)	MP:0004978	1	3.77	57	1	5.25	57	1	3.27	57	MP:0004978	decreased B-1 B cell number
/fs0/chenr6/Database_fs0/MGI/processing/term.gene/MP:0004982 (9)	MP:0004982	1	4.03	146	1	7.97	146	1	1.63	146	MP:0004982	abnormal osteoclast morphology
/fs0/chenr6/Database_fs0/MGI/processing/term.gene/MP:0004983 (5)	MP:0004983	1	3.34	97	1	5.25	97	1	2.44	97	MP:0004983	abnormal osteoclast cell number
/fs0/chenr6/Database_fs0/MGI/processing/term.gene/MP:0004984 (4)	MP:0004984	1	1.67	56	1	5.25	56	1	0	56	MP:0004984	increased osteoclast cell number
/fs0/chenr6/Database_fs0/MGI/processing/term.gene/MP:0004986 (6)	MP:0004986	1	5.02	106	1	Inf	106	1	3.27	106	MP:0004986	abnormal osteoblast morphology
/fs0/chenr6/Database_fs0/MGI/processing/term.gene/MP:0004987 (2)	MP:0004987	1	5	59	1	0	59	1	4.88	59	MP:0004987	abnormal osteoblast cell number
/fs0/chenr6/Database_fs0/MGI/processing/term.gene/MP:0005000 (29)	MP:0005000	1	3.12	313	1	1.98	313	1	4.14	313	MP:0005000	abnormal immune tolerance
/fs0/chenr6/Database_fs0/MGI/processing/term.gene/MP:0005005 (29)	MP:0005005	1	3.12	308	1	1.98	308	1	4.14	308	MP:0005005	abnormal self tolerance
/fs0/chenr6/Database_fs0/MGI/processing/term.gene/MP:0005006 (4)	MP:0005006	1	5.01	55	1	Inf	55	1	2.44	55	MP:0005006	abnormal osteoblast physiology
/fs0/chenr6/Database_fs0/MGI/processing/term.gene/MP:0005010 (21)	MP:0005010	1	3.12	283	1	2.65	283	1	4.28	283	MP:0005010	abnormal CD8-positive, alpha beta T cell morphology
/fs0/chenr6/Database_fs0/MGI/processing/term.gene/MP:0005011 (7)	MP:0005011	1	3.77	59	1	2.62	59	1	9.81	59	MP:0005011	increased eosinophil cell number
/fs0/chenr6/Database_fs0/MGI/processing/term.gene/MP:0005012 (7)	MP:0005012	1	3.77	64	1	5.25	64	1	4.9	64	MP:0005012	decreased eosinophil cell number
/fs0/chenr6/Database_fs0/MGI/processing/term.gene/MP:0005013 (53)	MP:0005013	1	2.44	549	1	2.71	549	1	2.14	549	MP:0005013	increased lymphocyte cell number
/fs0/chenr6/Database_fs0/MGI/processing/term.gene/MP:0005014 (23)	MP:0005014	1	2.21	222	1	1.98	222	1	2.19	222	MP:0005014	increased B cell number
/fs0/chenr6/Database_fs0/MGI/processing/term.gene/MP:0005015 (26)	MP:0005015	1	2.69	361	1	3.04	361	1	2.47	361	MP:0005015	increased T cell number
/fs0/chenr6/Database_fs0/MGI/processing/term.gene/MP:0005022 (11)	MP:0005022	1	4.21	110	1	3.98	110	1	4.9	110	MP:0005022	abnormal immature B cell morphology
/fs0/chenr6/Database_fs0/MGI/processing/term.gene/MP:0005023 (11)	MP:0005023	1	4.21	141	1	5.34	141	1	2.44	141	MP:0005023	abnormal wound healing
/fs0/chenr6/Database_fs0/MGI/processing/term.gene/MP:0005027 (7)	MP:0005027	1	12.64	81	1	5.25	81	1	19.82	81	MP:0005027	increased susceptibility to parasitic infection
/fs0/chenr6/Database_fs0/MGI/processing/term.gene/MP:0005028 (12)	MP:0005028	1	7.12	104	1	5.31	104	1	9.91	104	MP:0005028	abnormal trophectoderm morphology
/fs0/chenr6/Database_fs0/MGI/processing/term.gene/MP:0005031 (9)	MP:0005031	1	10.14	128	1	15.94	128	1	7.39	128	MP:0005031	abnormal trophoblast layer morphology
/fs0/chenr6/Database_fs0/MGI/processing/term.gene/MP:0005033 (7)	MP:0005033	1	12.64	70	1	15.94	70	1	9.81	70	MP:0005033	abnormal trophoblast giant cell morphology
/fs0/chenr6/Database_fs0/MGI/processing/term.gene/MP:0005048 (9)	MP:0005048	1	2.51	72	1	3.52	72	1	1.63	72	MP:0005048	abnormal thrombosis
/fs0/chenr6/Database_fs0/MGI/processing/term.gene/MP:0005061 (15)	MP:0005061	1	3.37	120	1	2.64	120	1	6.6	120	MP:0005061	abnormal eosinophil morphology
/fs0/chenr6/Database_fs0/MGI/processing/term.gene/MP:0005065 (29)	MP:0005065	1	2.28	259	1	3.55	259	1	1.76	259	MP:0005065	abnormal neutrophil morphology
/fs0/chenr6/Database_fs0/MGI/processing/term.gene/MP:0005068 (13)	MP:0005068	1	2.23	136	1	1.75	136	1	2.46	136	MP:0005068	abnormal NK cell morphology
/fs0/chenr6/Database_fs0/MGI/processing/term.gene/MP:0005070 (3)	MP:0005070	1	2.5	53	1	5.25	53	1	0	53	MP:0005070	impaired natural killer cell mediated cytotoxicity
/fs0/chenr6/Database_fs0/MGI/processing/term.gene/MP:0005078 (8)	MP:0005078	1	3.01	64	1	1.31	64	1	9.81	64	MP:0005078	abnormal cytotoxic T cell physiology
/fs0/chenr6/Database_fs0/MGI/processing/term.gene/MP:0005083 (3)	MP:0005083	1	10.02	50	1	10.55	50	1	0	50	MP:0005083	abnormal biliary tract morphology
/fs0/chenr6/Database_fs0/MGI/processing/term.gene/MP:0005087 (11)	MP:0005087	1	8.9	160	1	7.97	160	1	9.91	160	MP:0005087	decreased acute inflammation
/fs0/chenr6/Database_fs0/MGI/processing/term.gene/MP:0005088 (11)	MP:0005088	1	4.21	117	1	5.25	117	1	3.96	117	MP:0005088	increased acute inflammation
/fs0/chenr6/Database_fs0/MGI/processing/term.gene/MP:0005090 (6)	MP:0005090	1	10.08	63	1	15.94	63	1	4.88	63	MP:0005090	increased double-negative T cell number
/fs0/chenr6/Database_fs0/MGI/processing/term.gene/MP:0005092 (8)	MP:0005092	1	5.04	97	1	7.97	97	1	2.44	97	MP:0005092	decreased double-positive T cell number
/fs0/chenr6/Database_fs0/MGI/processing/term.gene/MP:0005093 (7)	MP:0005093	1	12.64	76	1	15.94	76	1	9.81	76	MP:0005093	decreased B cell proliferation
/fs0/chenr6/Database_fs0/MGI/processing/term.gene/MP:0005094 (24)	MP:0005094	1	2.08	250	1	1.31	250	1	4.97	250	MP:0005094	abnormal T cell proliferation
/fs0/chenr6/Database_fs0/MGI/processing/term.gene/MP:0005095 (12)	MP:0005095	1	2.51	147	1	1.05	147	1	4.93	147	MP:0005095	decreased T cell proliferation
/fs0/chenr6/Database_fs0/MGI/processing/term.gene/MP:0005103 (11)	MP:0005103	1	6.08	90	1	7.97	90	1	4.93	90	MP:0005103	abnormal retinal pigmentation
/fs0/chenr6/Database_fs0/MGI/processing/term.gene/MP:0005108 (5)	MP:0005108	1	7.54	73	1	Inf	73	1	4.9	73	MP:0005108	abnormal ulna morphology
/fs0/chenr6/Database_fs0/MGI/processing/term.gene/MP:0005116 (17)	MP:0005116	1	2.1	139	1	1.05	139	1	2.82	139	MP:0005116	abnormal circulating pituitary hormone level
/fs0/chenr6/Database_fs0/MGI/processing/term.gene/MP:0005117 (13)	MP:0005117	1	1.5	84	1	1.05	84	1	1.96	84	MP:0005117	increased circulating pituitary hormone level
/fs0/chenr6/Database_fs0/MGI/processing/term.gene/MP:0005118 (8)	MP:0005118	1	1.67	74	1	0	74	1	2.45	74	MP:0005118	decreased circulating pituitary hormone level
/fs0/chenr6/Database_fs0/MGI/processing/term.gene/MP:0005150 (13)	MP:0005150	1	3.15	100	1	8.98	100	1	0	100	MP:0005150	cachexia
/fs0/chenr6/Database_fs0/MGI/processing/term.gene/MP:0005153 (12)	MP:0005153	1	5.06	128	1	3.18	128	1	7.39	128	MP:0005153	abnormal B cell proliferation
/fs0/chenr6/Database_fs0/MGI/processing/term.gene/MP:0005154 (8)	MP:0005154	1	3.01	58	1	1.31	58	1	4.9	58	MP:0005154	increased B cell proliferation
/fs0/chenr6/Database_fs0/MGI/processing/term.gene/MP:0005159 (15)	MP:0005159	1	1.25	154	1	0	154	1	2.1	154	MP:0005159	azoospermia
/fs0/chenr6/Database_fs0/MGI/processing/term.gene/MP:0005165 (7)	MP:0005165	1	6.72	102	1	Inf	102	1	3.27	102	MP:0005165	increased susceptibility to injury
/fs0/chenr6/Database_fs0/MGI/processing/term.gene/MP:0005166 (9)	MP:0005166	1	1.43	129	1	3.52	129	1	0	129	MP:0005166	decreased susceptibility to injury
/fs0/chenr6/Database_fs0/MGI/processing/term.gene/MP:0005168 (1)	MP:0005168	1	0	54	1	0	54	1	0	54	MP:0005168	abnormal female meiosis
/fs0/chenr6/Database_fs0/MGI/processing/term.gene/MP:0005169 (14)	MP:0005169	1	0.38	133	1	0.87	133	1	0	133	MP:0005169	abnormal male meiosis
/fs0/chenr6/Database_fs0/MGI/processing/term.gene/MP:0005178 (22)	MP:0005178	1	1.48	220	1	2.12	220	1	1.22	220	MP:0005178	increased circulating cholesterol level
/fs0/chenr6/Database_fs0/MGI/processing/term.gene/MP:0005179 (22)	MP:0005179	1	2.36	242	1	1.05	242	1	4.28	242	MP:0005179	decreased circulating cholesterol level
/fs0/chenr6/Database_fs0/MGI/processing/term.gene/MP:0005180 (7)	MP:0005180	1	0	56	1	0	56	1	0	56	MP:0005180	abnormal circulating testosterone level
/fs0/chenr6/Database_fs0/MGI/processing/term.gene/MP:0005193 (43)	MP:0005193	1	1.14	391	1	0.87	391	1	1.64	391	MP:0005193	abnormal anterior eye segment morphology
/fs0/chenr6/Database_fs0/MGI/processing/term.gene/MP:0005194 (8)	MP:0005194	1	1.67	102	1	2.62	102	1	0.97	102	MP:0005194	abnormal anterior uvea morphology
/fs0/chenr6/Database_fs0/MGI/processing/term.gene/MP:0005197 (10)	MP:0005197	1	2.15	139	1	3.52	139	1	0.97	139	MP:0005197	abnormal uvea morphology
/fs0/chenr6/Database_fs0/MGI/processing/term.gene/MP:0005201 (18)	MP:0005201	1	4.07	153	1	5.34	153	1	2.82	153	MP:0005201	abnormal retinal pigment epithelium morphology
/fs0/chenr6/Database_fs0/MGI/processing/term.gene/MP:0005202 (9)	MP:0005202	1	1.43	90	1	1.75	90	1	1.22	90	MP:0005202	lethargy
/fs0/chenr6/Database_fs0/MGI/processing/term.gene/MP:0005215 (11)	MP:0005215	1	2.87	158	1	7.13	158	1	0.97	158	MP:0005215	abnormal pancreatic islet morphology
/fs0/chenr6/Database_fs0/MGI/processing/term.gene/MP:0005217 (8)	MP:0005217	1	3.01	98	1	5.31	98	1	1.63	98	MP:0005217	abnormal pancreatic beta cell morphology
/fs0/chenr6/Database_fs0/MGI/processing/term.gene/MP:0005221 (7)	MP:0005221	1	0.83	110	1	0	110	1	0.97	110	MP:0005221	abnormal rostral-caudal axis patterning
/fs0/chenr6/Database_fs0/MGI/processing/term.gene/MP:0005225 (2)	MP:0005225	1	5	53	1	0	53	1	Inf	53	MP:0005225	abnormal vertebrae development
/fs0/chenr6/Database_fs0/MGI/processing/term.gene/MP:0005241 (4)	MP:0005241	1	0	79	1	0	79	1	0	79	MP:0005241	abnormal retinal ganglion layer morphology
/fs0/chenr6/Database_fs0/MGI/processing/term.gene/MP:0005264 (6)	MP:0005264	1	2.5	56	1	0	56	1	3.27	56	MP:0005264	glomerulosclerosis
/fs0/chenr6/Database_fs0/MGI/processing/term.gene/MP:0005265 (13)	MP:0005265	1	3.15	184	1	5.28	184	1	3.29	184	MP:0005265	abnormal blood urea nitrogen level
/fs0/chenr6/Database_fs0/MGI/processing/term.gene/MP:0005266 (40)	MP:0005266	1	2.18	531	1	0.69	531	1	4.32	531	MP:0005266	abnormal metabolism
/fs0/chenr6/Database_fs0/MGI/processing/term.gene/MP:0005269 (3)	MP:0005269	1	2.5	67	1	5.25	67	1	0	67	MP:0005269	abnormal occipital bone morphology
/fs0/chenr6/Database_fs0/MGI/processing/term.gene/MP:0005277 (9)	MP:0005277	1	10.14	180	1	15.94	180	1	7.39	180	MP:0005277	abnormal brainstem morphology
/fs0/chenr6/Database_fs0/MGI/processing/term.gene/MP:0005278 (43)	MP:0005278	1	1.97	471	1	1.68	471	1	2.67	471	MP:0005278	abnormal cholesterol homeostasis
/fs0/chenr6/Database_fs0/MGI/processing/term.gene/MP:0005280 (16)	MP:0005280	1	1.15	208	1	2.11	208	1	0.61	208	MP:0005280	abnormal fatty acid level
/fs0/chenr6/Database_fs0/MGI/processing/term.gene/MP:0005281 (4)	MP:0005281	1	5.01	101	1	10.55	101	1	0	101	MP:0005281	increased fatty acid level
/fs0/chenr6/Database_fs0/MGI/processing/term.gene/MP:0005282 (13)	MP:0005282	1	0.41	115	1	0	115	1	0.69	115	MP:0005282	decreased fatty acid level
/fs0/chenr6/Database_fs0/MGI/processing/term.gene/MP:0005288 (13)	MP:0005288	1	1.5	120	1	1.5	120	1	1.63	120	MP:0005288	abnormal oxygen consumption
/fs0/chenr6/Database_fs0/MGI/processing/term.gene/MP:0005289 (9)	MP:0005289	1	2.51	79	1	2.11	79	1	4.88	79	MP:0005289	increased oxygen consumption
/fs0/chenr6/Database_fs0/MGI/processing/term.gene/MP:0005291 (39)	MP:0005291	1	1.74	413	1	2.3	413	1	1.15	413	MP:0005291	abnormal glucose tolerance
/fs0/chenr6/Database_fs0/MGI/processing/term.gene/MP:0005292 (18)	MP:0005292	1	3.22	184	1	7.13	184	1	1.84	184	MP:0005292	improved glucose tolerance
/fs0/chenr6/Database_fs0/MGI/processing/term.gene/MP:0005293 (22)	MP:0005293	1	0.79	240	1	0.87	240	1	0.54	240	MP:0005293	impaired glucose tolerance
/fs0/chenr6/Database_fs0/MGI/processing/term.gene/MP:0005296 (7)	MP:0005296	1	6.72	76	1	Inf	76	1	3.27	76	MP:0005296	abnormal humerus morphology
/fs0/chenr6/Database_fs0/MGI/processing/term.gene/MP:0005306 (3)	MP:0005306	1	10.02	67	1	5.25	67	1	Inf	67	MP:0005306	abnormal phalanx morphology
/fs0/chenr6/Database_fs0/MGI/processing/term.gene/MP:0005311 (21)	MP:0005311	1	1.18	207	1	1.75	207	1	0.88	207	MP:0005311	abnormal circulating amino acid level
/fs0/chenr6/Database_fs0/MGI/processing/term.gene/MP:0005316 (4)	MP:0005316	1	0	83	1	0	83	1	0	83	MP:0005316	abnormal response to tactile stimuli
/fs0/chenr6/Database_fs0/MGI/processing/term.gene/MP:0005317 (15)	MP:0005317	1	1.82	197	1	5.31	197	1	0.61	197	MP:0005317	increased triglyceride level
/fs0/chenr6/Database_fs0/MGI/processing/term.gene/MP:0005318 (29)	MP:0005318	1	1.31	241	1	1.44	241	1	1.22	241	MP:0005318	decreased triglyceride level
/fs0/chenr6/Database_fs0/MGI/processing/term.gene/MP:0005319 (35)	MP:0005319	1	1.75	505	1	0.8	505	1	2.18	505	MP:0005319	abnormal enzyme/coenzyme level
/fs0/chenr6/Database_fs0/MGI/processing/term.gene/MP:0005322 (6)	MP:0005322	1	10.08	59	1	5.25	59	1	19.82	59	MP:0005322	abnormal serotonin level
/fs0/chenr6/Database_fs0/MGI/processing/term.gene/MP:0005325 (23)	MP:0005325	1	3.93	221	1	3.52	221	1	4.48	221	MP:0005325	abnormal renal glomerulus morphology
/fs0/chenr6/Database_fs0/MGI/processing/term.gene/MP:0005326 (5)	MP:0005326	1	3.34	50	1	0	50	1	3.27	50	MP:0005326	abnormal podocyte morphology
/fs0/chenr6/Database_fs0/MGI/processing/term.gene/MP:0005328 (12)	MP:0005328	1	1	136	1	1.75	136	1	0.69	136	MP:0005328	abnormal circulating creatinine level
/fs0/chenr6/Database_fs0/MGI/processing/term.gene/MP:0005330 (7)	MP:0005330	1	3.77	80	1	0	80	1	3.69	80	MP:0005330	cardiomyopathy
/fs0/chenr6/Database_fs0/MGI/processing/term.gene/MP:0005331 (10)	MP:0005331	1	1.25	126	1	5.28	126	1	0	126	MP:0005331	insulin resistance
/fs0/chenr6/Database_fs0/MGI/processing/term.gene/MP:0005332 (23)	MP:0005332	1	1.05	259	1	1.5	259	1	0.81	259	MP:0005332	abnormal amino acid level
/fs0/chenr6/Database_fs0/MGI/processing/term.gene/MP:0005333 (7)	MP:0005333	1	6.72	99	1	Inf	99	1	0	99	MP:0005333	decreased heart rate
/fs0/chenr6/Database_fs0/MGI/processing/term.gene/MP:0005334 (24)	MP:0005334	1	2.08	229	1	3.04	229	1	2.19	229	MP:0005334	abnormal fat pad morphology
/fs0/chenr6/Database_fs0/MGI/processing/term.gene/MP:0005335 (10)	MP:0005335	1	3.35	65	1	1.75	65	1	7.39	65	MP:0005335	abnormal gonadal fat pad morphology
/fs0/chenr6/Database_fs0/MGI/processing/term.gene/MP:0005343 (6)	MP:0005343	1	1	66	1	0	66	1	2.44	66	MP:0005343	increased circulating aspartate transaminase level
/fs0/chenr6/Database_fs0/MGI/processing/term.gene/MP:0005344 (2)	MP:0005344	1	0	57	1	0	57	1	0	57	MP:0005344	increased circulating bilirubin level
/fs0/chenr6/Database_fs0/MGI/processing/term.gene/MP:0005345 (10)	MP:0005345	1	1.25	71	1	1.31	71	1	0.97	71	MP:0005345	abnormal circulating corticosterone level
/fs0/chenr6/Database_fs0/MGI/processing/term.gene/MP:0005348 (13)	MP:0005348	1	0.91	105	1	0.58	105	1	2.44	105	MP:0005348	increased T cell proliferation
/fs0/chenr6/Database_fs0/MGI/processing/term.gene/MP:0005350 (8)	MP:0005350	1	1.67	117	1	0	117	1	1.96	117	MP:0005350	increased susceptibility to autoimmune disorder
/fs0/chenr6/Database_fs0/MGI/processing/term.gene/MP:0005351 (10)	MP:0005351	1	3.35	145	1	1.31	145	1	6.6	145	MP:0005351	decreased susceptibility to autoimmune disorder
/fs0/chenr6/Database_fs0/MGI/processing/term.gene/MP:0005358 (7)	MP:0005358	1	6.72	83	1	Inf	83	1	3.27	83	MP:0005358	abnormal incisor morphology
/fs0/chenr6/Database_fs0/MGI/processing/term.gene/MP:0005371 (75)	MP:0005371	1	1.87	814	1	2.89	814	1	1.66	814	MP:0005371	limbs/digits/tail phenotype
/fs0/chenr6/Database_fs0/MGI/processing/term.gene/MP:0005375 (75)	MP:0005375	1	2.15	801	1	2.36	801	1	2.31	801	MP:0005375	adipose tissue phenotype
/fs0/chenr6/Database_fs0/MGI/processing/term.gene/MP:0005379 (170)	MP:0005379	1	1.87	1731	1	2.3	1731	1	1.75	1731	MP:0005379	endocrine/exocrine gland phenotype
/fs0/chenr6/Database_fs0/MGI/processing/term.gene/MP:0005389 (150)	MP:0005389	1	1.94	1640	1	1.74	1640	1	2.3	1640	MP:0005389	reproductive system phenotype
/fs0/chenr6/Database_fs0/MGI/processing/term.gene/MP:0005394 (5)	MP:0005394	1	20.16	105	1	5.25	105	1	Inf	105	MP:0005394	taste/olfaction phenotype
/fs0/chenr6/Database_fs0/MGI/processing/term.gene/MP:0005402 (4)	MP:0005402	1	5.01	94	1	Inf	94	1	2.44	94	MP:0005402	abnormal action potential
/fs0/chenr6/Database_fs0/MGI/processing/term.gene/MP:0005403 (4)	MP:0005403	1	5.01	50	1	5.25	50	1	4.88	50	MP:0005403	abnormal nerve conduction
/fs0/chenr6/Database_fs0/MGI/processing/term.gene/MP:0005404 (10)	MP:0005404	1	3.35	145	1	7.13	145	1	0	145	MP:0005404	abnormal axon morphology
/fs0/chenr6/Database_fs0/MGI/processing/term.gene/MP:0005405 (7)	MP:0005405	1	2	66	1	5.28	66	1	0	66	MP:0005405	axon degeneration
/fs0/chenr6/Database_fs0/MGI/processing/term.gene/MP:0005407 (3)	MP:0005407	1	10.02	54	1	Inf	54	1	4.88	54	MP:0005407	hyperalgesia
/fs0/chenr6/Database_fs0/MGI/processing/term.gene/MP:0005410 (4)	MP:0005410	1	0	95	1	0	95	1	0	95	MP:0005410	abnormal fertilization
/fs0/chenr6/Database_fs0/MGI/processing/term.gene/MP:0005416 (61)	MP:0005416	1	1.98	809	1	1.78	809	1	2.36	809	MP:0005416	abnormal circulating protein level
/fs0/chenr6/Database_fs0/MGI/processing/term.gene/MP:0005418 (76)	MP:0005418	1	1.58	728	1	1.68	728	1	1.46	728	MP:0005418	abnormal circulating hormone level
/fs0/chenr6/Database_fs0/MGI/processing/term.gene/MP:0005419 (10)	MP:0005419	1	1.25	99	1	0	99	1	1.63	99	MP:0005419	decreased circulating serum albumin level
/fs0/chenr6/Database_fs0/MGI/processing/term.gene/MP:0005423 (1)	MP:0005423	1	Inf	64	1	Inf	64	1	0	64	MP:0005423	abnormal somatic nervous system physiology
/fs0/chenr6/Database_fs0/MGI/processing/term.gene/MP:0005425 (10)	MP:0005425	1	3.35	112	1	15.94	112	1	1.22	112	MP:0005425	increased macrophage cell number
/fs0/chenr6/Database_fs0/MGI/processing/term.gene/MP:0005431 (6)	MP:0005431	1	2.5	63	1	0	63	1	3.27	63	MP:0005431	decreased oocyte number
/fs0/chenr6/Database_fs0/MGI/processing/term.gene/MP:0005432 (6)	MP:0005432	1	10.08	69	1	Inf	69	1	2.44	69	MP:0005432	abnormal pro-B cell morphology
/fs0/chenr6/Database_fs0/MGI/processing/term.gene/MP:0005437 (9)	MP:0005437	1	1.43	91	1	0	91	1	2.45	91	MP:0005437	abnormal glycogen level
/fs0/chenr6/Database_fs0/MGI/processing/term.gene/MP:0005438 (12)	MP:0005438	1	1.67	100	1	0	100	1	2.46	100	MP:0005438	abnormal glycogen homeostasis
/fs0/chenr6/Database_fs0/MGI/processing/term.gene/MP:0005439 (2)	MP:0005439	1	5	52	1	0	52	1	4.88	52	MP:0005439	decreased glycogen level
/fs0/chenr6/Database_fs0/MGI/processing/term.gene/MP:0005445 (4)	MP:0005445	1	0	53	1	0	53	1	0	53	MP:0005445	abnormal neurotransmitter secretion
/fs0/chenr6/Database_fs0/MGI/processing/term.gene/MP:0005448 (14)	MP:0005448	1	2.01	193	1	0.87	193	1	3.69	193	MP:0005448	abnormal energy homeostasis
/fs0/chenr6/Database_fs0/MGI/processing/term.gene/MP:0005449 (31)	MP:0005449	1	1.2	338	1	2.05	338	1	0.4	338	MP:0005449	abnormal food intake
/fs0/chenr6/Database_fs0/MGI/processing/term.gene/MP:0005450 (13)	MP:0005450	1	1.5	187	1	0.87	187	1	2.45	187	MP:0005450	abnormal energy expenditure
/fs0/chenr6/Database_fs0/MGI/processing/term.gene/MP:0005452 (51)	MP:0005452	1	1.93	596	1	1.45	596	1	3.02	596	MP:0005452	abnormal adipose tissue amount
/fs0/chenr6/Database_fs0/MGI/processing/term.gene/MP:0005455 (6)	MP:0005455	1	5.02	89	1	15.94	89	1	0	89	MP:0005455	increased susceptibility to weight gain
/fs0/chenr6/Database_fs0/MGI/processing/term.gene/MP:0005457 (17)	MP:0005457	1	2.75	122	1	4.27	122	1	1.63	122	MP:0005457	abnormal percent body fat/body weight
/fs0/chenr6/Database_fs0/MGI/processing/term.gene/MP:0005458 (11)	MP:0005458	1	2.87	52	1	21.4	52	1	0	52	MP:0005458	increased percent body fat/body weight
/fs0/chenr6/Database_fs0/MGI/processing/term.gene/MP:0005459 (6)	MP:0005459	1	2.5	70	1	0	70	1	Inf	70	MP:0005459	decreased percent body fat/body weight
/fs0/chenr6/Database_fs0/MGI/processing/term.gene/MP:0005461 (4)	MP:0005461	1	15.08	107	1	Inf	107	1	4.88	107	MP:0005461	abnormal dendritic cell morphology
/fs0/chenr6/Database_fs0/MGI/processing/term.gene/MP:0005463 (12)	MP:0005463	1	5.06	137	1	2.11	137	1	19.82	137	MP:0005463	abnormal CD4-positive, alpha-beta T cell physiology
/fs0/chenr6/Database_fs0/MGI/processing/term.gene/MP:0005464 (9)	MP:0005464	1	2.51	104	1	1.31	104	1	3.27	104	MP:0005464	abnormal platelet physiology
/fs0/chenr6/Database_fs0/MGI/processing/term.gene/MP:0005466 (4)	MP:0005466	1	15.08	54	1	5.25	54	1	Inf	54	MP:0005466	abnormal T-helper 2 physiology
/fs0/chenr6/Database_fs0/MGI/processing/term.gene/MP:0005468 (6)	MP:0005468	1	1	63	1	0	63	1	2.44	63	MP:0005468	abnormal thyroid hormone level
/fs0/chenr6/Database_fs0/MGI/processing/term.gene/MP:0005469 (4)	MP:0005469	1	0	55	1	0	55	1	0	55	MP:0005469	abnormal thyroxine level
/fs0/chenr6/Database_fs0/MGI/processing/term.gene/MP:0005501 (18)	MP:0005501	1	4.07	214	1	3.04	214	1	6.6	214	MP:0005501	abnormal skin physiology
/fs0/chenr6/Database_fs0/MGI/processing/term.gene/MP:0005502 (49)	MP:0005502	1	2.04	540	1	1.1	540	1	2.8	540	MP:0005502	abnormal renal/urinary system physiology
/fs0/chenr6/Database_fs0/MGI/processing/term.gene/MP:0005505 (5)	MP:0005505	1	7.54	57	1	Inf	57	1	4.9	57	MP:0005505	thrombocytosis
/fs0/chenr6/Database_fs0/MGI/processing/term.gene/MP:0005534 (4)	MP:0005534	1	1.67	61	1	Inf	61	1	0	61	MP:0005534	decreased body temperature
/fs0/chenr6/Database_fs0/MGI/processing/term.gene/MP:0005535 (10)	MP:0005535	1	2.15	96	1	2.64	96	1	1.63	96	MP:0005535	abnormal body temperature
/fs0/chenr6/Database_fs0/MGI/processing/term.gene/MP:0005551 (13)	MP:0005551	1	5.93	187	1	5.31	187	1	6.6	187	MP:0005551	abnormal eye electrophysiology
/fs0/chenr6/Database_fs0/MGI/processing/term.gene/MP:0005553 (9)	MP:0005553	1	1.43	87	1	2.62	87	1	0.97	87	MP:0005553	increased circulating creatinine level
/fs0/chenr6/Database_fs0/MGI/processing/term.gene/MP:0005554 (4)	MP:0005554	1	0	50	1	0	50	1	0	50	MP:0005554	decreased circulating creatinine level
/fs0/chenr6/Database_fs0/MGI/processing/term.gene/MP:0005559 (29)	MP:0005559	1	2.28	270	1	1.63	270	1	2.75	270	MP:0005559	increased circulating glucose level
/fs0/chenr6/Database_fs0/MGI/processing/term.gene/MP:0005560 (35)	MP:0005560	1	1.03	398	1	1.44	398	1	0.77	398	MP:0005560	decreased circulating glucose level
/fs0/chenr6/Database_fs0/MGI/processing/term.gene/MP:0005561 (11)	MP:0005561	1	1.88	101	1	0	101	1	4.93	101	MP:0005561	increased mean corpuscular hemoglobin
/fs0/chenr6/Database_fs0/MGI/processing/term.gene/MP:0005562 (5)	MP:0005562	1	3.34	67	1	0	67	1	4.9	67	MP:0005562	decreased mean corpuscular hemoglobin
/fs0/chenr6/Database_fs0/MGI/processing/term.gene/MP:0005563 (12)	MP:0005563	1	2.51	209	1	5.31	209	1	2.45	209	MP:0005563	abnormal hemoglobin content
/fs0/chenr6/Database_fs0/MGI/processing/term.gene/MP:0005564 (6)	MP:0005564	1	5.02	57	1	5.28	57	1	Inf	57	MP:0005564	increased hemoglobin content
/fs0/chenr6/Database_fs0/MGI/processing/term.gene/MP:0005565 (12)	MP:0005565	1	3.6	139	1	5.28	139	1	3.96	139	MP:0005565	increased blood urea nitrogen level
/fs0/chenr6/Database_fs0/MGI/processing/term.gene/MP:0005567 (5)	MP:0005567	1	3.34	56	1	1.75	56	1	9.81	56	MP:0005567	decreased circulating total protein level
/fs0/chenr6/Database_fs0/MGI/processing/term.gene/MP:0005578 (18)	MP:0005578	1	0.29	169	1	0	169	1	0.48	169	MP:0005578	teratozoospermia
/fs0/chenr6/Database_fs0/MGI/processing/term.gene/MP:0005584 (13)	MP:0005584	1	1.5	189	1	1.31	189	1	2.95	189	MP:0005584	abnormal enzyme/coenzyme activity
/fs0/chenr6/Database_fs0/MGI/processing/term.gene/MP:0005592 (4)	MP:0005592	1	5.01	70	1	10.55	70	1	0	70	MP:0005592	abnormal vascular smooth muscle morphology
/fs0/chenr6/Database_fs0/MGI/processing/term.gene/MP:0005595 (12)	MP:0005595	1	5.06	117	1	21.4	117	1	1.96	117	MP:0005595	abnormal vascular smooth muscle physiology
/fs0/chenr6/Database_fs0/MGI/processing/term.gene/MP:0005598 (7)	MP:0005598	1	12.64	63	1	Inf	63	1	1.63	63	MP:0005598	decreased ventricle muscle contractility
/fs0/chenr6/Database_fs0/MGI/processing/term.gene/MP:0005602 (2)	MP:0005602	1	5	66	1	5.25	66	1	0	66	MP:0005602	decreased angiogenesis
/fs0/chenr6/Database_fs0/MGI/processing/term.gene/MP:0005605 (5)	MP:0005605	1	3.34	65	1	Inf	65	1	1.63	65	MP:0005605	increased bone mass
/fs0/chenr6/Database_fs0/MGI/processing/term.gene/MP:0005606 (7)	MP:0005606	1	3.77	78	1	2.62	78	1	3.27	78	MP:0005606	increased bleeding time
/fs0/chenr6/Database_fs0/MGI/processing/term.gene/MP:0005616 (3)	MP:0005616	1	2.5	56	1	0	56	1	4.88	56	MP:0005616	decreased susceptibility to type IV hypersensitivity reaction
/fs0/chenr6/Database_fs0/MGI/processing/term.gene/MP:0005633 (5)	MP:0005633	1	1.25	80	1	0	80	1	1.63	80	MP:0005633	increased circulating sodium level
/fs0/chenr6/Database_fs0/MGI/processing/term.gene/MP:0005636 (34)	MP:0005636	1	2.11	438	1	1.76	438	1	2.5	438	MP:0005636	abnormal mineral homeostasis
/fs0/chenr6/Database_fs0/MGI/processing/term.gene/MP:0005637 (6)	MP:0005637	1	5.02	111	1	5.25	111	1	4.9	111	MP:0005637	abnormal iron homeostasis
/fs0/chenr6/Database_fs0/MGI/processing/term.gene/MP:0005640 (5)	MP:0005640	1	7.54	73	1	Inf	73	1	4.9	73	MP:0005640	abnormal mean corpuscular hemoglobin concentration
/fs0/chenr6/Database_fs0/MGI/processing/term.gene/MP:0005647 (7)	MP:0005647	1	0	57	1	0	57	1	0	57	MP:0005647	abnormal sex gland physiology
/fs0/chenr6/Database_fs0/MGI/processing/term.gene/MP:0005650 (9)	MP:0005650	1	4.03	76	1	10.55	76	1	3.69	76	MP:0005650	abnormal limb bud morphology
/fs0/chenr6/Database_fs0/MGI/processing/term.gene/MP:0005659 (9)	MP:0005659	1	1.43	103	1	1.31	103	1	1.63	103	MP:0005659	decreased susceptibility to diet-induced obesity
/fs0/chenr6/Database_fs0/MGI/processing/term.gene/MP:0005666 (6)	MP:0005666	1	2.5	84	1	0	84	1	9.81	84	MP:0005666	abnormal adipose tissue physiology
/fs0/chenr6/Database_fs0/MGI/processing/term.gene/MP:0005667 (19)	MP:0005667	1	2.33	178	1	1.76	178	1	3.69	178	MP:0005667	abnormal circulating leptin level
/fs0/chenr6/Database_fs0/MGI/processing/term.gene/MP:0005668 (15)	MP:0005668	1	2.52	95	1	1.31	95	1	7.39	95	MP:0005668	decreased circulating leptin level
/fs0/chenr6/Database_fs0/MGI/processing/term.gene/MP:0005669 (5)	MP:0005669	1	1.25	88	1	5.25	88	1	0	88	MP:0005669	increased circulating leptin level
/fs0/chenr6/Database_fs0/MGI/processing/term.gene/MP:0005671 (4)	MP:0005671	1	15.08	50	1	Inf	50	1	4.88	50	MP:0005671	abnormal response to transplant
/fs0/chenr6/Database_fs0/MGI/processing/term.gene/MP:0006007 (9)	MP:0006007	1	10.14	79	1	7.97	79	1	14.79	79	MP:0006007	abnormal basal ganglion morphology
/fs0/chenr6/Database_fs0/MGI/processing/term.gene/MP:0006009 (12)	MP:0006009	1	7.12	88	1	1.75	88	0.171	17.62	88	MP:0006009	abnormal neuronal migration
/fs0/chenr6/Database_fs0/MGI/processing/term.gene/MP:0006032 (4)	MP:0006032	1	15.08	53	1	Inf	53	1	9.81	53	MP:0006032	abnormal ureteric bud morphology
/fs0/chenr6/Database_fs0/MGI/processing/term.gene/MP:0006035 (5)	MP:0006035	1	1.25	94	1	0	94	1	2.44	94	MP:0006035	abnormal mitochondrion morphology
/fs0/chenr6/Database_fs0/MGI/processing/term.gene/MP:0006036 (11)	MP:0006036	1	1.11	120	1	3.52	120	1	0	120	MP:0006036	abnormal mitochondrial physiology
/fs0/chenr6/Database_fs0/MGI/processing/term.gene/MP:0006043 (14)	MP:0006043	1	5.08	169	1	3.52	169	1	4.97	169	MP:0006043	decreased apoptosis
/fs0/chenr6/Database_fs0/MGI/processing/term.gene/MP:0006055 (4)	MP:0006055	1	15.08	51	1	Inf	51	1	Inf	51	MP:0006055	abnormal vascular endothelial cell morphology
/fs0/chenr6/Database_fs0/MGI/processing/term.gene/MP:0006065 (6)	MP:0006065	1	2.5	52	1	5.28	52	1	2.44	52	MP:0006065	abnormal heart position or orientation
/fs0/chenr6/Database_fs0/MGI/processing/term.gene/MP:0006069 (22)	MP:0006069	1	2.9	257	1	3.04	257	1	2.82	257	MP:0006069	abnormal retinal neuronal layer morphology
/fs0/chenr6/Database_fs0/MGI/processing/term.gene/MP:0006094 (5)	MP:0006094	1	1.25	53	1	2.62	53	1	0	53	MP:0006094	increased fat cell size
/fs0/chenr6/Database_fs0/MGI/processing/term.gene/MP:0006107 (9)	MP:0006107	1	6.32	57	1	10.55	57	1	4.93	57	MP:0006107	abnormal fetal atrioventricular canal morphology
/fs0/chenr6/Database_fs0/MGI/processing/term.gene/MP:0006108 (8)	MP:0006108	1	8.42	138	1	0	138	1	12.45	138	MP:0006108	abnormal hindbrain development
/fs0/chenr6/Database_fs0/MGI/processing/term.gene/MP:0006126 (8)	MP:0006126	1	5.04	105	1	Inf	105	1	1.22	105	MP:0006126	abnormal cardiac outflow tract development
/fs0/chenr6/Database_fs0/MGI/processing/term.gene/MP:0006144 (3)	MP:0006144	1	0	59	1	0	59	1	0	59	MP:0006144	increased systemic arterial systolic blood pressure
/fs0/chenr6/Database_fs0/MGI/processing/term.gene/MP:0006204 (17)	MP:0006204	1	2.75	152	1	3.18	152	1	2.46	152	MP:0006204	embryonic lethality before implantation
/fs0/chenr6/Database_fs0/MGI/processing/term.gene/MP:0006205 (20)	MP:0006205	1	2.16	267	1	1.98	267	1	2.1	267	MP:0006205	embryonic lethality between implantation and somite formation
/fs0/chenr6/Database_fs0/MGI/processing/term.gene/MP:0006206 (8)	MP:0006206	1	5.04	88	1	5.25	88	1	4.93	88	MP:0006206	embryonic lethality between somite formation and embryo turning
/fs0/chenr6/Database_fs0/MGI/processing/term.gene/MP:0006254 (9)	MP:0006254	1	4.03	64	1	3.98	64	1	9.81	64	MP:0006254	thin cerebral cortex
/fs0/chenr6/Database_fs0/MGI/processing/term.gene/MP:0006279 (12)	MP:0006279	1	3.6	114	1	7.97	114	1	2.95	114	MP:0006279	abnormal limb development
/fs0/chenr6/Database_fs0/MGI/processing/term.gene/MP:0006298 (9)	MP:0006298	1	2.51	81	1	1.31	81	1	3.27	81	MP:0006298	abnormal platelet activation
/fs0/chenr6/Database_fs0/MGI/processing/term.gene/MP:0006307 (6)	MP:0006307	1	1	72	1	0	72	1	0.97	72	MP:0006307	abnormal seminiferous tubule size
/fs0/chenr6/Database_fs0/MGI/processing/term.gene/MP:0006315 (15)	MP:0006315	1	3.37	121	1	1.31	121	1	4.14	121	MP:0006315	abnormal urine protein level
/fs0/chenr6/Database_fs0/MGI/processing/term.gene/MP:0006319 (5)	MP:0006319	1	1.25	91	1	5.25	91	1	0	91	MP:0006319	abnormal epididymal fat pad morphology
/fs0/chenr6/Database_fs0/MGI/processing/term.gene/MP:0006325 (10)	MP:0006325	1	3.35	180	1	7.97	180	1	0.97	180	MP:0006325	impaired hearing
/fs0/chenr6/Database_fs0/MGI/processing/term.gene/MP:0006336 (3)	MP:0006336	1	2.5	60	1	5.25	60	1	0	60	MP:0006336	abnormal otoacoustic response
/fs0/chenr6/Database_fs0/MGI/processing/term.gene/MP:0006357 (30)	MP:0006357	1	2.17	377	1	1.98	377	1	2.49	377	MP:0006357	abnormal circulating mineral level
/fs0/chenr6/Database_fs0/MGI/processing/term.gene/MP:0006358 (2)	MP:0006358	1	0	54	1	0	54	1	0	54	MP:0006358	absent pinna reflex
/fs0/chenr6/Database_fs0/MGI/processing/term.gene/MP:0006361 (9)	MP:0006361	1	2.51	95	1	0	95	1	2.95	95	MP:0006361	abnormal female germ cell morphology
/fs0/chenr6/Database_fs0/MGI/processing/term.gene/MP:0006362 (48)	MP:0006362	1	1	460	1	0.65	460	1	1.22	460	MP:0006362	abnormal male germ cell morphology
/fs0/chenr6/Database_fs0/MGI/processing/term.gene/MP:0006380 (10)	MP:0006380	1	1.25	104	1	1.75	104	1	0.97	104	MP:0006380	abnormal spermatid morphology
/fs0/chenr6/Database_fs0/MGI/processing/term.gene/MP:0006382 (12)	MP:0006382	1	5.06	88	1	10.55	88	1	3.96	88	MP:0006382	abnormal lung epithelium morphology
/fs0/chenr6/Database_fs0/MGI/processing/term.gene/MP:0006387 (53)	MP:0006387	1	2.66	688	1	2.89	688	1	2.8	688	MP:0006387	abnormal T cell number
/fs0/chenr6/Database_fs0/MGI/processing/term.gene/MP:0006395 (13)	MP:0006395	1	1.5	149	1	0	149	1	3.69	149	MP:0006395	abnormal epiphyseal plate morphology
/fs0/chenr6/Database_fs0/MGI/processing/term.gene/MP:0006410 (9)	MP:0006410	1	0.62	87	1	0	87	1	0.97	87	MP:0006410	abnormal common myeloid progenitor cell morphology
/fs0/chenr6/Database_fs0/MGI/processing/term.gene/MP:0006412 (4)	MP:0006412	1	1.67	82	1	0	82	1	2.44	82	MP:0006412	abnormal T cell apoptosis
/fs0/chenr6/Database_fs0/MGI/processing/term.gene/MP:0006413 (3)	MP:0006413	1	2.5	51	1	0	51	1	4.88	51	MP:0006413	increased T cell apoptosis
/fs0/chenr6/Database_fs0/MGI/processing/term.gene/MP:0008007 (6)	MP:0008007	1	10.08	55	1	10.55	55	1	9.81	55	MP:0008007	abnormal cellular replicative senescence
/fs0/chenr6/Database_fs0/MGI/processing/term.gene/MP:0008014 (11)	MP:0008014	1	1.88	91	1	2.64	91	1	1.22	91	MP:0008014	increased lung tumor incidence
/fs0/chenr6/Database_fs0/MGI/processing/term.gene/MP:0008019 (8)	MP:0008019	1	5.04	91	1	7.97	91	1	2.44	91	MP:0008019	increased liver tumor incidence
/fs0/chenr6/Database_fs0/MGI/processing/term.gene/MP:0008026 (14)	MP:0008026	1	5.08	154	1	5.28	154	1	4.97	154	MP:0008026	abnormal brain white matter morphology
/fs0/chenr6/Database_fs0/MGI/processing/term.gene/MP:0008036 (5)	MP:0008036	1	0	86	1	0	86	1	0	86	MP:0008036	abnormal NK T cell morphology
/fs0/chenr6/Database_fs0/MGI/processing/term.gene/MP:0008037 (57)	MP:0008037	1	2.59	745	1	2.58	745	1	2.94	745	MP:0008037	abnormal T cell morphology
/fs0/chenr6/Database_fs0/MGI/processing/term.gene/MP:0008038 (5)	MP:0008038	1	0	86	1	0	86	1	0	86	MP:0008038	abnormal NK T cell number
/fs0/chenr6/Database_fs0/MGI/processing/term.gene/MP:0008040 (4)	MP:0008040	1	0	66	1	0	66	1	0	66	MP:0008040	decreased NK T cell number
/fs0/chenr6/Database_fs0/MGI/processing/term.gene/MP:0008043 (12)	MP:0008043	1	1.67	130	1	1.75	130	1	1.63	130	MP:0008043	abnormal NK cell number
/fs0/chenr6/Database_fs0/MGI/processing/term.gene/MP:0008044 (7)	MP:0008044	1	3.77	54	1	5.25	54	1	3.27	54	MP:0008044	increased NK cell number
/fs0/chenr6/Database_fs0/MGI/processing/term.gene/MP:0008045 (5)	MP:0008045	1	0	85	1	0	85	1	0	85	MP:0008045	decreased NK cell number
/fs0/chenr6/Database_fs0/MGI/processing/term.gene/MP:0008048 (10)	MP:0008048	1	3.35	104	1	1.05	104	1	14.79	104	MP:0008048	abnormal memory T cell number
/fs0/chenr6/Database_fs0/MGI/processing/term.gene/MP:0008049 (8)	MP:0008049	1	3.01	58	1	0	58	1	14.79	58	MP:0008049	increased memory T cell number
/fs0/chenr6/Database_fs0/MGI/processing/term.gene/MP:0008056 (2)	MP:0008056	1	0	57	1	0	57	1	0	57	MP:0008056	abnormal retinal ganglion cell morphology
/fs0/chenr6/Database_fs0/MGI/processing/term.gene/MP:0008058 (8)	MP:0008058	1	0.71	80	1	0	80	1	1.22	80	MP:0008058	abnormal DNA repair
/fs0/chenr6/Database_fs0/MGI/processing/term.gene/MP:0008073 (23)	MP:0008073	1	1.78	309	1	1.16	309	1	2.47	309	MP:0008073	abnormal CD4-positive, alpha beta T cell number
/fs0/chenr6/Database_fs0/MGI/processing/term.gene/MP:0008074 (12)	MP:0008074	1	1.67	153	1	2.11	153	1	1.22	153	MP:0008074	increased CD4-positive, alpha beta T cell number
/fs0/chenr6/Database_fs0/MGI/processing/term.gene/MP:0008075 (14)	MP:0008075	1	2.01	191	1	0	191	1	4.95	191	MP:0008075	decreased CD4-positive, alpha beta T cell number
/fs0/chenr6/Database_fs0/MGI/processing/term.gene/MP:0008076 (4)	MP:0008076	1	1.67	55	1	0	55	1	2.44	55	MP:0008076	abnormal CD4-positive T cell differentiation
/fs0/chenr6/Database_fs0/MGI/processing/term.gene/MP:0008077 (17)	MP:0008077	1	3.55	255	1	3.52	255	1	3.54	255	MP:0008077	abnormal CD8-positive, alpha-beta T cell number
/fs0/chenr6/Database_fs0/MGI/processing/term.gene/MP:0008078 (5)	MP:0008078	1	3.34	105	1	5.25	105	1	2.44	105	MP:0008078	increased CD8-positive, alpha-beta T cell number
/fs0/chenr6/Database_fs0/MGI/processing/term.gene/MP:0008079 (14)	MP:0008079	1	3.79	177	1	1.75	177	1	4.97	177	MP:0008079	decreased CD8-positive, alpha-beta T cell number
/fs0/chenr6/Database_fs0/MGI/processing/term.gene/MP:0008081 (4)	MP:0008081	1	1.67	64	1	0	64	1	4.88	64	MP:0008081	abnormal single-positive T cell number
/fs0/chenr6/Database_fs0/MGI/processing/term.gene/MP:0008125 (2)	MP:0008125	1	Inf	88	1	Inf	88	1	0	88	MP:0008125	abnormal dendritic cell number
/fs0/chenr6/Database_fs0/MGI/processing/term.gene/MP:0008127 (1)	MP:0008127	1	Inf	59	1	Inf	59	1	0	59	MP:0008127	decreased dendritic cell number
/fs0/chenr6/Database_fs0/MGI/processing/term.gene/MP:0008143 (6)	MP:0008143	1	10.08	130	1	10.55	130	1	19.82	130	MP:0008143	abnormal dendrite morphology
/fs0/chenr6/Database_fs0/MGI/processing/term.gene/MP:0008148 (1)	MP:0008148	1	0	58	1	0	58	1	0	58	MP:0008148	abnormal sternocostal joint morphology
/fs0/chenr6/Database_fs0/MGI/processing/term.gene/MP:0008171 (37)	MP:0008171	1	3.13	444	1	3.97	444	1	2.29	444	MP:0008171	abnormal mature B cell morphology
/fs0/chenr6/Database_fs0/MGI/processing/term.gene/MP:0008172 (9)	MP:0008172	1	2.51	60	1	1.31	60	1	4.9	60	MP:0008172	abnormal follicular B cell morphology
/fs0/chenr6/Database_fs0/MGI/processing/term.gene/MP:0008180 (11)	MP:0008180	1	2.87	86	1	3.52	86	1	2.45	86	MP:0008180	abnormal marginal zone B cell morphology
/fs0/chenr6/Database_fs0/MGI/processing/term.gene/MP:0008182 (8)	MP:0008182	1	5.04	55	1	10.55	55	1	3.27	55	MP:0008182	decreased marginal zone B cell number
/fs0/chenr6/Database_fs0/MGI/processing/term.gene/MP:0008188 (10)	MP:0008188	1	5.05	53	1	5.31	53	1	4.9	53	MP:0008188	abnormal transitional stage B cell morphology
/fs0/chenr6/Database_fs0/MGI/processing/term.gene/MP:0008209 (5)	MP:0008209	1	1.25	57	1	Inf	57	1	0	57	MP:0008209	decreased pre-B cell number
/fs0/chenr6/Database_fs0/MGI/processing/term.gene/MP:0008210 (11)	MP:0008210	1	1.88	123	1	1.05	123	1	3.27	123	MP:0008210	increased mature B cell number
/fs0/chenr6/Database_fs0/MGI/processing/term.gene/MP:0008211 (18)	MP:0008211	1	3.22	194	1	3.18	194	1	3.29	194	MP:0008211	decreased mature B cell number
/fs0/chenr6/Database_fs0/MGI/processing/term.gene/MP:0008215 (7)	MP:0008215	1	12.64	79	1	15.94	79	1	9.81	79	MP:0008215	decreased immature B cell number
/fs0/chenr6/Database_fs0/MGI/processing/term.gene/MP:0008217 (17)	MP:0008217	1	3.55	142	1	2.27	142	1	4.95	142	MP:0008217	abnormal B cell activation
/fs0/chenr6/Database_fs0/MGI/processing/term.gene/MP:0008219 (11)	MP:0008219	1	6.08	98	1	2.62	98	1	8.3	98	MP:0008219	abnormal dorsal telencephalic commissure morphology
/fs0/chenr6/Database_fs0/MGI/processing/term.gene/MP:0008248 (39)	MP:0008248	1	2.27	478	1	4.86	478	1	1.15	478	MP:0008248	abnormal mononuclear phagocyte morphology
/fs0/chenr6/Database_fs0/MGI/processing/term.gene/MP:0008250 (67)	MP:0008250	1	2.37	732	1	3.59	732	1	1.78	732	MP:0008250	abnormal myeloid leukocyte morphology
/fs0/chenr6/Database_fs0/MGI/processing/term.gene/MP:0008251 (56)	MP:0008251	1	2.24	621	1	4.12	621	1	1.46	621	MP:0008251	abnormal phagocyte morphology
/fs0/chenr6/Database_fs0/MGI/processing/term.gene/MP:0008260 (3)	MP:0008260	1	0	53	1	0	53	1	0	53	MP:0008260	abnormal autophagy
/fs0/chenr6/Database_fs0/MGI/processing/term.gene/MP:0008261 (9)	MP:0008261	1	0	98	1	0	98	1	0	98	MP:0008261	arrest of male meiosis
/fs0/chenr6/Database_fs0/MGI/processing/term.gene/MP:0008271 (22)	MP:0008271	1	4.26	329	1	4.48	329	1	4.97	329	MP:0008271	abnormal bone ossification
/fs0/chenr6/Database_fs0/MGI/processing/term.gene/MP:0008272 (7)	MP:0008272	1	6.72	90	1	Inf	90	1	4.9	90	MP:0008272	abnormal endochondral bone ossification
/fs0/chenr6/Database_fs0/MGI/processing/term.gene/MP:0008280 (15)	MP:0008280	1	0.35	118	1	0	118	1	0.54	118	MP:0008280	abnormal male germ cell apoptosis
/fs0/chenr6/Database_fs0/MGI/processing/term.gene/MP:0008284 (6)	MP:0008284	1	25.28	56	1	Inf	56	1	19.82	56	MP:0008284	abnormal hippocampus pyramidal cell layer
/fs0/chenr6/Database_fs0/MGI/processing/term.gene/MP:0008343 (7)	MP:0008343	1	3.77	86	1	2.62	86	1	4.9	86	MP:0008343	abnormal gamma-delta T cell morphology
/fs0/chenr6/Database_fs0/MGI/processing/term.gene/MP:0008345 (7)	MP:0008345	1	3.77	76	1	2.62	76	1	4.9	76	MP:0008345	abnormal gamma-delta T cell number
/fs0/chenr6/Database_fs0/MGI/processing/term.gene/MP:0008347 (5)	MP:0008347	1	3.34	51	1	2.62	51	1	4.88	51	MP:0008347	decreased gamma-delta T cell number
/fs0/chenr6/Database_fs0/MGI/processing/term.gene/MP:0008396 (7)	MP:0008396	1	6.72	73	1	7.97	73	1	4.88	73	MP:0008396	abnormal osteoclast differentiation
/fs0/chenr6/Database_fs0/MGI/processing/term.gene/MP:0008397 (4)	MP:0008397	1	0	53	1	0	53	1	0	53	MP:0008397	abnormal CD4-positive, CD25-positive, alpha-beta regulatory T cell morphology
/fs0/chenr6/Database_fs0/MGI/processing/term.gene/MP:0008414 (8)	MP:0008414	1	8.42	51	1	7.97	51	1	14.79	51	MP:0008414	abnormal spatial reference memory
/fs0/chenr6/Database_fs0/MGI/processing/term.gene/MP:0008415 (19)	MP:0008415	1	3.7	281	1	5.41	281	1	3.96	281	MP:0008415	abnormal neurite morphology
/fs0/chenr6/Database_fs0/MGI/processing/term.gene/MP:0008428 (4)	MP:0008428	1	15.08	58	1	Inf	58	1	0	58	MP:0008428	abnormal spatial working memory
/fs0/chenr6/Database_fs0/MGI/processing/term.gene/MP:0008450 (5)	MP:0008450	1	3.34	71	1	2.62	71	1	4.88	71	MP:0008450	retinal photoreceptor degeneration
/fs0/chenr6/Database_fs0/MGI/processing/term.gene/MP:0008469 (67)	MP:0008469	1	2.2	900	1	1.52	900	1	2.96	900	MP:0008469	abnormal protein level
/fs0/chenr6/Database_fs0/MGI/processing/term.gene/MP:0008470 (14)	MP:0008470	1	3.79	124	1	2.11	124	1	6.6	124	MP:0008470	abnormal spleen B cell follicle morphology
/fs0/chenr6/Database_fs0/MGI/processing/term.gene/MP:0008472 (11)	MP:0008472	1	4.21	93	1	1.31	93	1	9.91	93	MP:0008472	abnormal spleen secondary B follicle morphology
/fs0/chenr6/Database_fs0/MGI/processing/term.gene/MP:0008489 (16)	MP:0008489	1	3.03	140	1	1.31	140	1	4.99	140	MP:0008489	slow postnatal weight gain
/fs0/chenr6/Database_fs0/MGI/processing/term.gene/MP:0008495 (12)	MP:0008495	1	7.12	110	1	7.13	110	1	7.39	110	MP:0008495	decreased IgG1 level
/fs0/chenr6/Database_fs0/MGI/processing/term.gene/MP:0008496 (10)	MP:0008496	1	3.35	73	1	3.52	73	1	3.27	73	MP:0008496	decreased IgG2a level
/fs0/chenr6/Database_fs0/MGI/processing/term.gene/MP:0008497 (10)	MP:0008497	1	7.6	56	1	7.97	56	1	7.39	56	MP:0008497	decreased IgG2b level
/fs0/chenr6/Database_fs0/MGI/processing/term.gene/MP:0008498 (11)	MP:0008498	1	4.21	69	1	7.13	69	1	1.63	69	MP:0008498	decreased IgG3 level
/fs0/chenr6/Database_fs0/MGI/processing/term.gene/MP:0008499 (7)	MP:0008499	1	2	71	1	0	71	1	4.9	71	MP:0008499	increased IgG1 level
/fs0/chenr6/Database_fs0/MGI/processing/term.gene/MP:0008500 (13)	MP:0008500	1	4.34	67	1	5.31	67	1	3.69	67	MP:0008500	increased IgG2a level
/fs0/chenr6/Database_fs0/MGI/processing/term.gene/MP:0008503 (17)	MP:0008503	1	3.55	162	1	1.75	162	1	4.28	162	MP:0008503	abnormal spinal cord grey matter morphology
/fs0/chenr6/Database_fs0/MGI/processing/term.gene/MP:0008515 (8)	MP:0008515	1	1.67	83	1	2.62	83	1	1.22	83	MP:0008515	thin retinal outer nuclear layer
/fs0/chenr6/Database_fs0/MGI/processing/term.gene/MP:0008535 (6)	MP:0008535	1	2.5	57	1	3.52	57	1	0	57	MP:0008535	enlarged lateral ventricles
/fs0/chenr6/Database_fs0/MGI/processing/term.gene/MP:0008537 (4)	MP:0008537	1	0	71	1	0	71	1	0	71	MP:0008537	increased susceptibility to induced colitis
/fs0/chenr6/Database_fs0/MGI/processing/term.gene/MP:0008548 (1)	MP:0008548	1	0	77	1	0	77	1	0	77	MP:0008548	abnormal circulating interferon level
/fs0/chenr6/Database_fs0/MGI/processing/term.gene/MP:0008551 (0)	MP:0008551	1	0	61	1	0	61	1	0	61	MP:0008551	abnormal circulating interferon-gamma level
/fs0/chenr6/Database_fs0/MGI/processing/term.gene/MP:0008552 (10)	MP:0008552	1	3.35	99	1	10.55	99	1	1.96	99	MP:0008552	abnormal circulating tumor necrosis factor level
/fs0/chenr6/Database_fs0/MGI/processing/term.gene/MP:0008553 (6)	MP:0008553	1	2.5	59	1	5.25	59	1	1.63	59	MP:0008553	increased circulating tumor necrosis factor level
/fs0/chenr6/Database_fs0/MGI/processing/term.gene/MP:0008555 (19)	MP:0008555	1	2.33	255	1	2.27	255	1	2.46	255	MP:0008555	abnormal interferon secretion
/fs0/chenr6/Database_fs0/MGI/processing/term.gene/MP:0008556 (17)	MP:0008556	1	2.75	182	1	3.52	182	1	2.47	182	MP:0008556	abnormal tumor necrosis factor secretion
/fs0/chenr6/Database_fs0/MGI/processing/term.gene/MP:0008559 (16)	MP:0008559	1	2.29	220	1	2.27	220	1	2.45	220	MP:0008559	abnormal interferon-gamma secretion
/fs0/chenr6/Database_fs0/MGI/processing/term.gene/MP:0008560 (9)	MP:0008560	1	4.03	90	1	5.25	90	1	3.69	90	MP:0008560	increased tumor necrosis factor secretion
/fs0/chenr6/Database_fs0/MGI/processing/term.gene/MP:0008561 (10)	MP:0008561	1	1.25	102	1	2.62	102	1	0.81	102	MP:0008561	decreased tumor necrosis factor secretion
/fs0/chenr6/Database_fs0/MGI/processing/term.gene/MP:0008566 (5)	MP:0008566	1	1.25	101	1	0	101	1	2.44	101	MP:0008566	increased interferon-gamma secretion
/fs0/chenr6/Database_fs0/MGI/processing/term.gene/MP:0008567 (10)	MP:0008567	1	2.15	132	1	2.11	132	1	2.44	132	MP:0008567	decreased interferon-gamma secretion
/fs0/chenr6/Database_fs0/MGI/processing/term.gene/MP:0008568 (36)	MP:0008568	1	3.28	383	1	2.43	383	1	4.14	383	MP:0008568	abnormal interleukin secretion
/fs0/chenr6/Database_fs0/MGI/processing/term.gene/MP:0008569 (6)	MP:0008569	1	10.08	80	1	0	80	1	Inf	80	MP:0008569	lethality at weaning
/fs0/chenr6/Database_fs0/MGI/processing/term.gene/MP:0008588 (15)	MP:0008588	1	4.44	187	1	7.97	187	1	3.96	187	MP:0008588	abnormal circulating interleukin level
/fs0/chenr6/Database_fs0/MGI/processing/term.gene/MP:0008595 (10)	MP:0008595	1	5.05	105	1	15.94	105	1	2.45	105	MP:0008595	abnormal circulating interleukin-6 level
/fs0/chenr6/Database_fs0/MGI/processing/term.gene/MP:0008596 (7)	MP:0008596	1	3.77	66	1	10.55	66	1	1.63	66	MP:0008596	increased circulating interleukin-6 level
/fs0/chenr6/Database_fs0/MGI/processing/term.gene/MP:0008650 (2)	MP:0008650	1	5	70	1	0	70	1	4.88	70	MP:0008650	abnormal interleukin-1 secretion
/fs0/chenr6/Database_fs0/MGI/processing/term.gene/MP:0008656 (2)	MP:0008656	1	5	65	1	0	65	1	4.88	65	MP:0008656	abnormal interleukin-1 beta secretion
/fs0/chenr6/Database_fs0/MGI/processing/term.gene/MP:0008659 (5)	MP:0008659	1	3.34	59	1	2.62	59	1	4.88	59	MP:0008659	abnormal interleukin-10 secretion
/fs0/chenr6/Database_fs0/MGI/processing/term.gene/MP:0008662 (5)	MP:0008662	1	3.34	53	1	0	53	1	4.9	53	MP:0008662	abnormal interleukin-12 secretion
/fs0/chenr6/Database_fs0/MGI/processing/term.gene/MP:0008686 (13)	MP:0008686	1	4.34	98	1	2.11	98	1	9.91	98	MP:0008686	abnormal interleukin-2 secretion
/fs0/chenr6/Database_fs0/MGI/processing/term.gene/MP:0008688 (6)	MP:0008688	1	5.02	55	1	0	55	1	Inf	55	MP:0008688	decreased interleukin-2 secretion
/fs0/chenr6/Database_fs0/MGI/processing/term.gene/MP:0008698 (11)	MP:0008698	1	6.08	101	1	2.64	101	1	19.82	101	MP:0008698	abnormal interleukin-4 secretion
/fs0/chenr6/Database_fs0/MGI/processing/term.gene/MP:0008700 (6)	MP:0008700	1	5.02	58	1	1.75	58	1	Inf	58	MP:0008700	decreased interleukin-4 secretion
/fs0/chenr6/Database_fs0/MGI/processing/term.gene/MP:0008704 (12)	MP:0008704	1	2.51	150	1	3.52	150	1	1.96	150	MP:0008704	abnormal interleukin-6 secretion
/fs0/chenr6/Database_fs0/MGI/processing/term.gene/MP:0008705 (5)	MP:0008705	1	3.34	70	1	2.62	70	1	4.88	70	MP:0008705	increased interleukin-6 secretion
/fs0/chenr6/Database_fs0/MGI/processing/term.gene/MP:0008706 (8)	MP:0008706	1	1.67	81	1	2.62	81	1	1.22	81	MP:0008706	decreased interleukin-6 secretion
/fs0/chenr6/Database_fs0/MGI/processing/term.gene/MP:0008714 (10)	MP:0008714	1	2.15	65	1	2.64	65	1	1.63	65	MP:0008714	increased lung carcinoma incidence
/fs0/chenr6/Database_fs0/MGI/processing/term.gene/MP:0008716 (7)	MP:0008716	1	2	51	1	2.62	51	1	1.63	51	MP:0008716	increased lung non-small cell carcinoma incidence
/fs0/chenr6/Database_fs0/MGI/processing/term.gene/MP:0008721 (4)	MP:0008721	1	1.67	52	1	0	52	1	4.88	52	MP:0008721	abnormal chemokine level
/fs0/chenr6/Database_fs0/MGI/processing/term.gene/MP:0008722 (6)	MP:0008722	1	2.5	52	1	5.25	52	1	2.44	52	MP:0008722	abnormal chemokine secretion
/fs0/chenr6/Database_fs0/MGI/processing/term.gene/MP:0008734 (6)	MP:0008734	1	25.28	60	1	Inf	60	1	14.79	60	MP:0008734	decreased susceptibility to endotoxin shock
/fs0/chenr6/Database_fs0/MGI/processing/term.gene/MP:0008735 (4)	MP:0008735	1	1.67	54	1	Inf	54	1	0	54	MP:0008735	increased susceptibility to endotoxin shock
/fs0/chenr6/Database_fs0/MGI/processing/term.gene/MP:0008737 (8)	MP:0008737	1	1.67	63	1	2.64	63	1	0	63	MP:0008737	abnormal spleen physiology
/fs0/chenr6/Database_fs0/MGI/processing/term.gene/MP:0008750 (3)	MP:0008750	1	10.02	91	1	0	91	1	9.81	91	MP:0008750	abnormal interferon level
/fs0/chenr6/Database_fs0/MGI/processing/term.gene/MP:0008752 (12)	MP:0008752	1	5.06	127	1	10.55	127	1	3.96	127	MP:0008752	abnormal tumor necrosis factor level
/fs0/chenr6/Database_fs0/MGI/processing/term.gene/MP:0008770 (13)	MP:0008770	1	5.93	159	1	5.28	159	1	6.22	159	MP:0008770	decreased survivor rate
/fs0/chenr6/Database_fs0/MGI/processing/term.gene/MP:0008772 (13)	MP:0008772	1	4.34	147	1	7.97	147	1	2.46	147	MP:0008772	increased heart ventricle size
/fs0/chenr6/Database_fs0/MGI/processing/term.gene/MP:0008801 (10)	MP:0008801	1	7.6	80	1	0	80	0.236	30.04	80	MP:0008801	abnormal erythroid progenitor cell morphology
/fs0/chenr6/Database_fs0/MGI/processing/term.gene/MP:0008803 (7)	MP:0008803	1	6.72	73	1	2.62	73	1	14.79	73	MP:0008803	abnormal placental labyrinth vasculature morphology
/fs0/chenr6/Database_fs0/MGI/processing/term.gene/MP:0008823 (8)	MP:0008823	1	8.42	52	1	10.7	52	1	4.88	52	MP:0008823	abnormal interventricular septum membranous part morphology
/fs0/chenr6/Database_fs0/MGI/processing/term.gene/MP:0008831 (4)	MP:0008831	1	0	55	1	0	55	1	0	55	MP:0008831	abnormal insulin-like growth factor I level
/fs0/chenr6/Database_fs0/MGI/processing/term.gene/MP:0008844 (9)	MP:0008844	1	0.62	72	1	0	72	1	1.22	72	MP:0008844	decreased subcutaneous adipose tissue amount
/fs0/chenr6/Database_fs0/MGI/processing/term.gene/MP:0008866 (5)	MP:0008866	1	1.25	85	1	2.62	85	1	0	85	MP:0008866	chromosomal instability
/fs0/chenr6/Database_fs0/MGI/processing/term.gene/MP:0008871 (9)	MP:0008871	1	2.51	102	1	5.25	102	1	2.45	102	MP:0008871	abnormal ovarian follicle number
/fs0/chenr6/Database_fs0/MGI/processing/term.gene/MP:0008874 (18)	MP:0008874	1	2.52	216	1	2.11	216	1	2.82	216	MP:0008874	decreased physiological sensitivity to xenobiotic
/fs0/chenr6/Database_fs0/MGI/processing/term.gene/MP:0008892 (13)	MP:0008892	1	0.41	113	1	0	113	1	0.61	113	MP:0008892	abnormal sperm flagellum morphology
/fs0/chenr6/Database_fs0/MGI/processing/term.gene/MP:0008898 (7)	MP:0008898	1	0	56	1	0	56	1	0	56	MP:0008898	abnormal acrosome morphology
/fs0/chenr6/Database_fs0/MGI/processing/term.gene/MP:0008932 (20)	MP:0008932	1	2.72	226	1	1.75	226	1	3.1	226	MP:0008932	abnormal embryonic tissue physiology
/fs0/chenr6/Database_fs0/MGI/processing/term.gene/MP:0008942 (10)	MP:0008942	1	2.15	195	1	1.75	195	1	2.45	195	MP:0008942	abnormal induced cell death
/fs0/chenr6/Database_fs0/MGI/processing/term.gene/MP:0008943 (8)	MP:0008943	1	0.71	134	1	1.75	134	1	0	134	MP:0008943	increased sensitivity to induced cell death
/fs0/chenr6/Database_fs0/MGI/processing/term.gene/MP:0008944 (3)	MP:0008944	1	10.02	74	1	0	74	1	Inf	74	MP:0008944	decreased sensitivity to induced cell death
/fs0/chenr6/Database_fs0/MGI/processing/term.gene/MP:0008946 (27)	MP:0008946	1	4.11	333	1	2.12	333	1	5.77	333	MP:0008946	abnormal neuron number
/fs0/chenr6/Database_fs0/MGI/processing/term.gene/MP:0008947 (8)	MP:0008947	1	5.04	65	1	2.62	65	1	4.93	65	MP:0008947	increased neuron number
/fs0/chenr6/Database_fs0/MGI/processing/term.gene/MP:0008948 (21)	MP:0008948	1	3.12	268	1	1.98	268	1	3.54	268	MP:0008948	decreased neuron number
/fs0/chenr6/Database_fs0/MGI/processing/term.gene/MP:0008957 (3)	MP:0008957	1	10.02	57	1	Inf	57	1	4.88	57	MP:0008957	abnormal placenta junctional zone morphology
/fs0/chenr6/Database_fs0/MGI/processing/term.gene/MP:0008986 (11)	MP:0008986	1	2.87	150	1	2.62	150	1	2.95	150	MP:0008986	abnormal liver parenchyma morphology
/fs0/chenr6/Database_fs0/MGI/processing/term.gene/MP:0008987 (10)	MP:0008987	1	3.35	143	1	2.62	143	1	3.69	143	MP:0008987	abnormal liver lobule morphology
/fs0/chenr6/Database_fs0/MGI/processing/term.gene/MP:0009115 (16)	MP:0009115	1	2.29	162	1	1.5	162	1	3.69	162	MP:0009115	abnormal fat cell morphology
/fs0/chenr6/Database_fs0/MGI/processing/term.gene/MP:0009117 (7)	MP:0009117	1	0.83	75	1	0	75	1	1.22	75	MP:0009117	abnormal white fat cell morphology
/fs0/chenr6/Database_fs0/MGI/processing/term.gene/MP:0009132 (7)	MP:0009132	1	0.83	59	1	0	59	1	1.22	59	MP:0009132	abnormal white fat cell size
/fs0/chenr6/Database_fs0/MGI/processing/term.gene/MP:0009142 (12)	MP:0009142	1	1	120	1	1.75	120	1	0.81	120	MP:0009142	decreased prepulse inhibition
/fs0/chenr6/Database_fs0/MGI/processing/term.gene/MP:0009165 (11)	MP:0009165	1	2.87	159	1	7.13	159	1	0.97	159	MP:0009165	abnormal endocrine pancreas morphology
/fs0/chenr6/Database_fs0/MGI/processing/term.gene/MP:0009170 (5)	MP:0009170	1	3.34	78	1	5.28	78	1	0	78	MP:0009170	abnormal pancreatic islet size
/fs0/chenr6/Database_fs0/MGI/processing/term.gene/MP:0009198 (73)	MP:0009198	1	1.31	674	1	1.71	674	1	1.27	674	MP:0009198	abnormal male genitalia morphology
/fs0/chenr6/Database_fs0/MGI/processing/term.gene/MP:0009205 (69)	MP:0009205	1	1.28	658	1	1.55	658	1	1.31	658	MP:0009205	abnormal internal male genitalia morphology
/fs0/chenr6/Database_fs0/MGI/processing/term.gene/MP:0009208 (36)	MP:0009208	1	2.24	357	1	1.31	357	1	2.83	357	MP:0009208	abnormal female genitalia morphology
/fs0/chenr6/Database_fs0/MGI/processing/term.gene/MP:0009209 (35)	MP:0009209	1	2.03	351	1	0.65	351	1	2.83	351	MP:0009209	abnormal internal female genitalia morphology
/fs0/chenr6/Database_fs0/MGI/processing/term.gene/MP:0009230 (11)	MP:0009230	1	0	93	1	0	93	1	0	93	MP:0009230	abnormal sperm head morphology
/fs0/chenr6/Database_fs0/MGI/processing/term.gene/MP:0009250 (50)	MP:0009250	1	2.42	582	1	2.7	582	1	2.65	582	MP:0009250	abnormal appendicular skeleton morphology
/fs0/chenr6/Database_fs0/MGI/processing/term.gene/MP:0009269 (4)	MP:0009269	1	1.67	59	1	0	59	1	4.88	59	MP:0009269	decreased fat cell size
/fs0/chenr6/Database_fs0/MGI/processing/term.gene/MP:0009308 (9)	MP:0009308	1	2.51	96	1	1.75	96	1	3.27	96	MP:0009308	increased adenocarcinoma incidence
/fs0/chenr6/Database_fs0/MGI/processing/term.gene/MP:0009333 (8)	MP:0009333	1	1.67	58	1	2.64	58	1	0	58	MP:0009333	abnormal splenocyte physiology
/fs0/chenr6/Database_fs0/MGI/processing/term.gene/MP:0009344 (12)	MP:0009344	1	3.6	81	1	0	81	1	6.22	81	MP:0009344	abnormal ovulation cycle
/fs0/chenr6/Database_fs0/MGI/processing/term.gene/MP:0009345 (6)	MP:0009345	1	5.02	69	1	5.28	69	1	4.88	69	MP:0009345	abnormal trabecular bone thickness
/fs0/chenr6/Database_fs0/MGI/processing/term.gene/MP:0009355 (8)	MP:0009355	1	1.67	72	1	2.62	72	1	1.22	72	MP:0009355	increased liver triglyceride level
/fs0/chenr6/Database_fs0/MGI/processing/term.gene/MP:0009356 (7)	MP:0009356	1	0.83	59	1	2.62	59	1	0	59	MP:0009356	decreased liver triglyceride level
/fs0/chenr6/Database_fs0/MGI/processing/term.gene/MP:0009357 (7)	MP:0009357	1	6.72	164	1	5.28	164	1	4.9	164	MP:0009357	abnormal seizure response to inducing agent
/fs0/chenr6/Database_fs0/MGI/processing/term.gene/MP:0009364 (4)	MP:0009364	1	1.67	57	1	Inf	57	1	0	57	MP:0009364	abnormal mature ovarian follicle morphology
/fs0/chenr6/Database_fs0/MGI/processing/term.gene/MP:0009389 (21)	MP:0009389	1	4.65	188	1	5.34	188	1	3.74	188	MP:0009389	abnormal extracutaneous pigmentation
/fs0/chenr6/Database_fs0/MGI/processing/term.gene/MP:0009398 (11)	MP:0009398	1	8.9	107	1	15.94	107	1	4.95	107	MP:0009398	abnormal skeletal muscle fiber size
/fs0/chenr6/Database_fs0/MGI/processing/term.gene/MP:0009400 (9)	MP:0009400	1	10.14	74	1	10.55	74	1	6.6	74	MP:0009400	decreased skeletal muscle fiber size
/fs0/chenr6/Database_fs0/MGI/processing/term.gene/MP:0009404 (8)	MP:0009404	1	3.01	64	1	1.75	64	1	3.27	64	MP:0009404	centrally nucleated skeletal muscle fibers
/fs0/chenr6/Database_fs0/MGI/processing/term.gene/MP:0009431 (3)	MP:0009431	1	10.02	56	1	0	56	1	Inf	56	MP:0009431	decreased fetal weight
/fs0/chenr6/Database_fs0/MGI/processing/term.gene/MP:0009458 (8)	MP:0009458	1	5.04	61	1	2.62	61	1	4.93	61	MP:0009458	abnormal skeletal muscle size
/fs0/chenr6/Database_fs0/MGI/processing/term.gene/MP:0009489 (8)	MP:0009489	1	8.42	65	1	Inf	65	1	9.91	65	MP:0009489	abnormal blood vessel endothelium morphology
/fs0/chenr6/Database_fs0/MGI/processing/term.gene/MP:0009503 (5)	MP:0009503	1	3.34	50	1	Inf	50	1	3.27	50	MP:0009503	abnormal mammary gland duct morphology
/fs0/chenr6/Database_fs0/MGI/processing/term.gene/MP:0009504 (5)	MP:0009504	1	3.34	61	1	Inf	61	1	3.27	61	MP:0009504	abnormal mammary gland epithelium morphology
/fs0/chenr6/Database_fs0/MGI/processing/term.gene/MP:0009546 (5)	MP:0009546	1	3.34	78	1	5.25	78	1	2.44	78	MP:0009546	absent gastric milk in neonates
/fs0/chenr6/Database_fs0/MGI/processing/term.gene/MP:0009548 (9)	MP:0009548	1	2.51	75	1	1.31	75	1	3.27	75	MP:0009548	abnormal platelet aggregation
/fs0/chenr6/Database_fs0/MGI/processing/term.gene/MP:0009549 (6)	MP:0009549	1	2.5	57	1	1.75	57	1	2.44	57	MP:0009549	decreased platelet aggregation
/fs0/chenr6/Database_fs0/MGI/processing/term.gene/MP:0009643 (27)	MP:0009643	1	1.76	359	1	0.47	359	1	2.99	359	MP:0009643	abnormal urine homeostasis
/fs0/chenr6/Database_fs0/MGI/processing/term.gene/MP:0009644 (16)	MP:0009644	1	3.03	185	1	3.98	185	1	3.29	185	MP:0009644	uremia
/fs0/chenr6/Database_fs0/MGI/processing/term.gene/MP:0009653 (12)	MP:0009653	1	5.06	93	0.9	26.95	93	1	3.27	93	MP:0009653	abnormal palate development
/fs0/chenr6/Database_fs0/MGI/processing/term.gene/MP:0009655 (12)	MP:0009655	1	5.06	90	0.9	26.95	90	1	3.27	90	MP:0009655	abnormal secondary palate development
/fs0/chenr6/Database_fs0/MGI/processing/term.gene/MP:0009657 (4)	MP:0009657	1	5.01	53	1	5.25	53	1	4.88	53	MP:0009657	failure of chorioallantoic fusion
/fs0/chenr6/Database_fs0/MGI/processing/term.gene/MP:0009661 (5)	MP:0009661	1	1.25	134	1	1.75	134	1	0	134	MP:0009661	abnormal pregnancy
/fs0/chenr6/Database_fs0/MGI/processing/term.gene/MP:0009672 (8)	MP:0009672	1	1.67	95	1	1.05	95	1	4.88	95	MP:0009672	abnormal birth weight
/fs0/chenr6/Database_fs0/MGI/processing/term.gene/MP:0009674 (8)	MP:0009674	1	1.67	93	1	1.05	93	1	4.88	93	MP:0009674	decreased birth weight
/fs0/chenr6/Database_fs0/MGI/processing/term.gene/MP:0009676 (19)	MP:0009676	1	4.59	206	1	2.65	206	1	6	206	MP:0009676	abnormal hemostasis
/fs0/chenr6/Database_fs0/MGI/processing/term.gene/MP:0009701 (14)	MP:0009701	1	1.36	181	1	1.05	181	1	1.96	181	MP:0009701	abnormal birth body size
/fs0/chenr6/Database_fs0/MGI/processing/term.gene/MP:0009703 (14)	MP:0009703	1	1.36	178	1	1.05	178	1	1.96	178	MP:0009703	decreased birth body size
/fs0/chenr6/Database_fs0/MGI/processing/term.gene/MP:0009746 (6)	MP:0009746	1	10.08	63	1	2.62	63	1	Inf	63	MP:0009746	enhanced behavioral response to xenobiotic
/fs0/chenr6/Database_fs0/MGI/processing/term.gene/MP:0009747 (8)	MP:0009747	1	3.01	74	1	0	74	1	4.93	74	MP:0009747	impaired behavioral response to xenobiotic
/fs0/chenr6/Database_fs0/MGI/processing/term.gene/MP:0009748 (8)	MP:0009748	1	8.42	84	1	Inf	84	1	6.6	84	MP:0009748	abnormal behavioral response to addictive substance
/fs0/chenr6/Database_fs0/MGI/processing/term.gene/MP:0009763 (19)	MP:0009763	1	4.59	272	1	8.98	272	1	2.82	272	MP:0009763	increased sensitivity to induced morbidity/mortality
/fs0/chenr6/Database_fs0/MGI/processing/term.gene/MP:0009764 (7)	MP:0009764	1	12.64	77	1	Inf	77	1	4.9	77	MP:0009764	decreased sensitivity to induced morbidity/mortality
/fs0/chenr6/Database_fs0/MGI/processing/term.gene/MP:0009765 (12)	MP:0009765	1	3.6	136	1	5.25	136	1	3.29	136	MP:0009765	abnormal xenobiotic induced morbidity/mortality
/fs0/chenr6/Database_fs0/MGI/processing/term.gene/MP:0009766 (8)	MP:0009766	1	5.04	106	1	5.25	106	1	4.93	106	MP:0009766	increased sensitivity to xenobiotic induced morbidity/mortality
/fs0/chenr6/Database_fs0/MGI/processing/term.gene/MP:0009768 (6)	MP:0009768	1	2.5	85	1	5.28	85	1	0	85	MP:0009768	impaired somite development
/fs0/chenr6/Database_fs0/MGI/processing/term.gene/MP:0009781 (4)	MP:0009781	1	0	70	1	0	70	1	0	70	MP:0009781	abnormal preimplantation embryo development
/fs0/chenr6/Database_fs0/MGI/processing/term.gene/MP:0009785 (9)	MP:0009785	1	1.43	143	1	0	143	1	1.96	143	MP:0009785	altered susceptibility to infection induced morbidity/mortality
/fs0/chenr6/Database_fs0/MGI/processing/term.gene/MP:0009786 (5)	MP:0009786	1	1.25	59	1	0	59	1	1.63	59	MP:0009786	decreased susceptibility to infection induced morbidity/mortality
/fs0/chenr6/Database_fs0/MGI/processing/term.gene/MP:0009787 (6)	MP:0009787	1	1	104	1	0	104	1	1.22	104	MP:0009787	increased susceptibility to infection induced morbidity/mortality
/fs0/chenr6/Database_fs0/MGI/processing/term.gene/MP:0009788 (5)	MP:0009788	1	1.25	67	1	0	67	1	1.63	67	MP:0009788	increased susceptibility to bacterial infection induced morbidity/mortality
/fs0/chenr6/Database_fs0/MGI/processing/term.gene/MP:0009819 (7)	MP:0009819	1	0	56	1	0	56	1	0	56	MP:0009819	abnormal circulating androgen level
/fs0/chenr6/Database_fs0/MGI/processing/term.gene/MP:0009820 (3)	MP:0009820	1	0	58	1	0	58	1	0	58	MP:0009820	abnormal liver vasculature morphology
/fs0/chenr6/Database_fs0/MGI/processing/term.gene/MP:0009850 (32)	MP:0009850	1	3.07	383	1	1.76	383	1	4.48	383	MP:0009850	embryonic lethality between implantation and placentation
/fs0/chenr6/Database_fs0/MGI/processing/term.gene/MP:0009887 (7)	MP:0009887	1	6.72	56	1	Inf	56	1	4.88	56	MP:0009887	abnormal palatal shelf fusion at midline
/fs0/chenr6/Database_fs0/MGI/processing/term.gene/MP:0009890 (13)	MP:0009890	1	4.34	118	1	13.47	118	1	3.27	118	MP:0009890	cleft secondary palate
/fs0/chenr6/Database_fs0/MGI/processing/term.gene/MP:0009939 (7)	MP:0009939	1	6.72	76	1	5.25	76	1	7.39	76	MP:0009939	abnormal hippocampus neuron morphology
/fs0/chenr6/Database_fs0/MGI/processing/term.gene/MP:0009964 (4)	MP:0009964	1	Inf	62	1	0	62	1	Inf	62	MP:0009964	abnormal cerebellum lobule morphology
/fs0/chenr6/Database_fs0/MGI/processing/term.gene/MP:0010024 (13)	MP:0010024	1	3.15	126	1	5.34	126	1	2.45	126	MP:0010024	increased total body fat amount
/fs0/chenr6/Database_fs0/MGI/processing/term.gene/MP:0010025 (30)	MP:0010025	1	1.25	338	1	1.05	338	1	1.63	338	MP:0010025	decreased total body fat amount
/fs0/chenr6/Database_fs0/MGI/processing/term.gene/MP:0010029 (3)	MP:0010029	1	2.5	58	1	Inf	58	1	0	58	MP:0010029	abnormal basicranium morphology
/fs0/chenr6/Database_fs0/MGI/processing/term.gene/MP:0010031 (9)	MP:0010031	1	10.14	71	0.9	26.95	71	1	2.44	71	MP:0010031	abnormal cranium size
/fs0/chenr6/Database_fs0/MGI/processing/term.gene/MP:0010038 (6)	MP:0010038	1	5.02	133	1	5.25	133	1	4.9	133	MP:0010038	abnormal placenta physiology
/fs0/chenr6/Database_fs0/MGI/processing/term.gene/MP:0010052 (11)	MP:0010052	1	0.5	96	1	1.31	96	1	0	96	MP:0010052	increased grip strength
/fs0/chenr6/Database_fs0/MGI/processing/term.gene/MP:0010053 (21)	MP:0010053	1	1.57	218	1	1.44	218	1	2.1	218	MP:0010053	decreased grip strength
/fs0/chenr6/Database_fs0/MGI/processing/term.gene/MP:0010055 (1)	MP:0010055	1	Inf	53	1	Inf	53	1	0	53	MP:0010055	abnormal sensory neuron physiology
/fs0/chenr6/Database_fs0/MGI/processing/term.gene/MP:0010066 (7)	MP:0010066	1	6.72	79	1	10.55	79	1	4.9	79	MP:0010066	abnormal red blood cell distribution width
/fs0/chenr6/Database_fs0/MGI/processing/term.gene/MP:0010067 (5)	MP:0010067	1	20.16	67	1	10.55	67	1	Inf	67	MP:0010067	increased red blood cell distribution width
/fs0/chenr6/Database_fs0/MGI/processing/term.gene/MP:0010080 (11)	MP:0010080	1	4.21	87	1	2.62	87	1	4.95	87	MP:0010080	abnormal hepatocyte physiology
/fs0/chenr6/Database_fs0/MGI/processing/term.gene/MP:0010094 (5)	MP:0010094	1	1.25	86	1	2.62	86	1	0	86	MP:0010094	abnormal chromosome stability
/fs0/chenr6/Database_fs0/MGI/processing/term.gene/MP:0010101 (8)	MP:0010101	1	0	66	1	0	66	1	0	66	MP:0010101	increased sacral vertebrae number
/fs0/chenr6/Database_fs0/MGI/processing/term.gene/MP:0010119 (27)	MP:0010119	1	1.76	359	1	1.98	359	1	2.06	359	MP:0010119	abnormal bone mineral density
/fs0/chenr6/Database_fs0/MGI/processing/term.gene/MP:0010122 (25)	MP:0010122	1	2.38	290	1	4.48	290	1	1.79	290	MP:0010122	abnormal bone mineral content
/fs0/chenr6/Database_fs0/MGI/processing/term.gene/MP:0010123 (14)	MP:0010123	1	2.8	102	1	7.13	102	1	1.96	102	MP:0010123	increased bone mineral content
/fs0/chenr6/Database_fs0/MGI/processing/term.gene/MP:0010124 (14)	MP:0010124	1	2.01	207	1	2.64	207	1	1.4	207	MP:0010124	decreased bone mineral content
/fs0/chenr6/Database_fs0/MGI/processing/term.gene/MP:0010147 (16)	MP:0010147	1	0.71	145	1	1.31	145	1	0.44	145	MP:0010147	abnormal endocrine pancreas physiology
/fs0/chenr6/Database_fs0/MGI/processing/term.gene/MP:0010155 (10)	MP:0010155	1	1.25	199	1	0.75	199	1	Inf	199	MP:0010155	abnormal intestine physiology
/fs0/chenr6/Database_fs0/MGI/processing/term.gene/MP:0010182 (11)	MP:0010182	1	2.87	120	1	2.64	120	1	3.27	120	MP:0010182	decreased susceptibility to weight gain
/fs0/chenr6/Database_fs0/MGI/processing/term.gene/MP:0010183 (7)	MP:0010183	1	2	79	1	0	79	1	4.9	79	MP:0010183	abnormal CD4-positive helper T cell morphology
/fs0/chenr6/Database_fs0/MGI/processing/term.gene/MP:0010210 (18)	MP:0010210	1	3.22	241	1	5.31	241	1	2.82	241	MP:0010210	abnormal circulating cytokine level
/fs0/chenr6/Database_fs0/MGI/processing/term.gene/MP:0010224 (5)	MP:0010224	1	7.54	57	1	5.25	57	1	9.81	57	MP:0010224	abnormal heart ventricle outflow tract morphology
/fs0/chenr6/Database_fs0/MGI/processing/term.gene/MP:0010240 (8)	MP:0010240	1	5.04	53	1	2.62	53	1	4.93	53	MP:0010240	decreased skeletal muscle size
/fs0/chenr6/Database_fs0/MGI/processing/term.gene/MP:0010279 (4)	MP:0010279	1	5.01	51	1	0	51	1	Inf	51	MP:0010279	increased gastrointestinal tumor incidence
/fs0/chenr6/Database_fs0/MGI/processing/term.gene/MP:0010287 (6)	MP:0010287	1	2.5	51	1	0	51	1	3.27	51	MP:0010287	increased reproductive system tumor incidence
/fs0/chenr6/Database_fs0/MGI/processing/term.gene/MP:0010288 (10)	MP:0010288	1	1.25	126	1	0	126	1	1.63	126	MP:0010288	increased gland tumor incidence
/fs0/chenr6/Database_fs0/MGI/processing/term.gene/MP:0010292 (6)	MP:0010292	1	5.02	57	1	2.62	57	1	9.81	57	MP:0010292	increased alimentary system tumor incidence
/fs0/chenr6/Database_fs0/MGI/processing/term.gene/MP:0010293 (4)	MP:0010293	1	1.67	73	1	2.62	73	1	0	73	MP:0010293	increased integument system tumor incidence
/fs0/chenr6/Database_fs0/MGI/processing/term.gene/MP:0010296 (17)	MP:0010296	1	3.55	169	1	5.38	169	1	1.96	169	MP:0010296	increased hemolymphoid system tumor incidence
/fs0/chenr6/Database_fs0/MGI/processing/term.gene/MP:0010297 (8)	MP:0010297	1	5.04	91	1	7.97	91	1	2.44	91	MP:0010297	increased hepatobiliary system tumor incidence
/fs0/chenr6/Database_fs0/MGI/processing/term.gene/MP:0010298 (11)	MP:0010298	1	1.88	91	1	2.64	91	1	1.22	91	MP:0010298	increased respiratory system tumor incidence
/fs0/chenr6/Database_fs0/MGI/processing/term.gene/MP:0010329 (25)	MP:0010329	1	2.38	270	1	2.05	270	1	4.97	270	MP:0010329	abnormal lipoprotein level
/fs0/chenr6/Database_fs0/MGI/processing/term.gene/MP:0010330 (25)	MP:0010330	1	2.38	270	1	2.05	270	1	4.97	270	MP:0010330	abnormal circulating lipoprotein level
/fs0/chenr6/Database_fs0/MGI/processing/term.gene/MP:0010358 (14)	MP:0010358	1	0.83	163	1	1.31	163	1	0.61	163	MP:0010358	abnormal free fatty acids level
/fs0/chenr6/Database_fs0/MGI/processing/term.gene/MP:0010365 (2)	MP:0010365	1	0	50	1	0	50	1	0	50	MP:0010365	increased thymus tumor incidence
/fs0/chenr6/Database_fs0/MGI/processing/term.gene/MP:0010383 (9)	MP:0010383	1	6.32	102	1	5.28	102	1	7.39	102	MP:0010383	increased adenoma incidence
/fs0/chenr6/Database_fs0/MGI/processing/term.gene/MP:0010403 (9)	MP:0010403	1	6.32	71	1	7.97	71	1	4.9	71	MP:0010403	atrial septal defect
/fs0/chenr6/Database_fs0/MGI/processing/term.gene/MP:0010412 (7)	MP:0010412	1	2	69	1	2.62	69	1	1.63	69	MP:0010412	atrioventricular septal defect
/fs0/chenr6/Database_fs0/MGI/processing/term.gene/MP:0010418 (8)	MP:0010418	1	8.42	51	1	10.7	51	1	4.88	51	MP:0010418	perimembraneous ventricular septal defect
/fs0/chenr6/Database_fs0/MGI/processing/term.gene/MP:0010425 (17)	MP:0010425	1	4.52	157	1	5.34	157	1	3.29	157	MP:0010425	abnormal heart and great vessel attachment
/fs0/chenr6/Database_fs0/MGI/processing/term.gene/MP:0010426 (17)	MP:0010426	1	4.52	157	1	5.34	157	1	3.29	157	MP:0010426	abnormal heart and great artery attachment
/fs0/chenr6/Database_fs0/MGI/processing/term.gene/MP:0010435 (4)	MP:0010435	1	5.01	54	1	Inf	54	1	2.44	54	MP:0010435	abnormal heart atrium and ventricle connection
/fs0/chenr6/Database_fs0/MGI/processing/term.gene/MP:0010454 (4)	MP:0010454	1	5.01	66	1	Inf	66	1	2.44	66	MP:0010454	abnormal truncus arteriosus septation
/fs0/chenr6/Database_fs0/MGI/processing/term.gene/MP:0010468 (14)	MP:0010468	1	6.8	94	1	13.47	94	1	2.95	94	MP:0010468	abnormal thoracic aorta morphology
/fs0/chenr6/Database_fs0/MGI/processing/term.gene/MP:0010503 (6)	MP:0010503	1	25.28	52	1	Inf	52	1	14.79	52	MP:0010503	myocardial trabeculae hypoplasia
/fs0/chenr6/Database_fs0/MGI/processing/term.gene/MP:0010508 (16)	MP:0010508	1	1.67	137	1	1.31	137	1	1.84	137	MP:0010508	abnormal heart electrocardiography waveform feature
/fs0/chenr6/Database_fs0/MGI/processing/term.gene/MP:0010559 (4)	MP:0010559	1	1.67	51	1	0	51	1	1.63	51	MP:0010559	heart block
/fs0/chenr6/Database_fs0/MGI/processing/term.gene/MP:0010563 (11)	MP:0010563	1	4.21	83	1	7.97	83	1	1.96	83	MP:0010563	increased heart right ventricle size
/fs0/chenr6/Database_fs0/MGI/processing/term.gene/MP:0010577 (11)	MP:0010577	1	4.21	96	1	7.97	96	1	1.96	96	MP:0010577	abnormal heart right ventricle size
/fs0/chenr6/Database_fs0/MGI/processing/term.gene/MP:0010578 (4)	MP:0010578	1	5.01	93	1	5.25	93	1	4.88	93	MP:0010578	abnormal heart left ventricle size
/fs0/chenr6/Database_fs0/MGI/processing/term.gene/MP:0010579 (4)	MP:0010579	1	5.01	80	1	5.25	80	1	4.88	80	MP:0010579	increased heart left ventricle size
/fs0/chenr6/Database_fs0/MGI/processing/term.gene/MP:0010592 (8)	MP:0010592	1	3.01	71	1	5.28	71	1	1.63	71	MP:0010592	abnormal atrioventricular septum morphology
/fs0/chenr6/Database_fs0/MGI/processing/term.gene/MP:0010639 (14)	MP:0010639	1	2.8	135	1	2.65	135	1	3.27	135	MP:0010639	altered tumor pathology
/fs0/chenr6/Database_fs0/MGI/processing/term.gene/MP:0010650 (4)	MP:0010650	1	5.01	53	1	Inf	53	1	2.44	53	MP:0010650	abnormal aorticopulmonary septum morphology
/fs0/chenr6/Database_fs0/MGI/processing/term.gene/MP:0010651 (4)	MP:0010651	1	5.01	53	1	Inf	53	1	2.44	53	MP:0010651	aorticopulmonary septal defect
/fs0/chenr6/Database_fs0/MGI/processing/term.gene/MP:0010680 (6)	MP:0010680	1	2.5	120	1	5.25	120	1	3.27	120	MP:0010680	abnormal skin adnexa physiology
/fs0/chenr6/Database_fs0/MGI/processing/term.gene/MP:0010760 (4)	MP:0010760	1	15.08	53	1	Inf	53	1	4.88	53	MP:0010760	abnormal macrophage chemotaxis
/fs0/chenr6/Database_fs0/MGI/processing/term.gene/MP:0010766 (6)	MP:0010766	1	5.02	92	1	2.62	92	1	9.81	92	MP:0010766	abnormal NK cell physiology
/fs0/chenr6/Database_fs0/MGI/processing/term.gene/MP:0010783 (9)	MP:0010783	1	6.32	71	1	21.4	71	1	3.27	71	MP:0010783	abnormal stomach wall morphology
/fs0/chenr6/Database_fs0/MGI/processing/term.gene/MP:0010792 (9)	MP:0010792	1	6.32	68	1	21.4	68	1	3.27	68	MP:0010792	abnormal stomach mucosa morphology
/fs0/chenr6/Database_fs0/MGI/processing/term.gene/MP:0010831 (15)	MP:0010831	1	4.44	197	1	5.28	197	1	4.14	197	MP:0010831	lethality, incomplete penetrance
/fs0/chenr6/Database_fs0/MGI/processing/term.gene/MP:0010833 (10)	MP:0010833	1	3.35	105	1	1.05	105	1	14.79	105	MP:0010833	abnormal memory T cell morphology
/fs0/chenr6/Database_fs0/MGI/processing/term.gene/MP:0010867 (9)	MP:0010867	1	4.03	101	1	5.28	101	1	3.27	101	MP:0010867	abnormal bone trabecula morphology
/fs0/chenr6/Database_fs0/MGI/processing/term.gene/MP:0010874 (9)	MP:0010874	1	4.03	118	1	3.52	118	1	4.9	118	MP:0010874	abnormal bone volume
/fs0/chenr6/Database_fs0/MGI/processing/term.gene/MP:0010875 (2)	MP:0010875	1	5	53	1	0	53	1	Inf	53	MP:0010875	increased bone volume
/fs0/chenr6/Database_fs0/MGI/processing/term.gene/MP:0010876 (8)	MP:0010876	1	5.04	66	1	5.28	66	1	4.9	66	MP:0010876	decreased bone volume
/fs0/chenr6/Database_fs0/MGI/processing/term.gene/MP:0010877 (4)	MP:0010877	1	1.67	73	1	2.62	73	1	0	73	MP:0010877	abnormal trabecular bone volume
/fs0/chenr6/Database_fs0/MGI/processing/term.gene/MP:0010898 (8)	MP:0010898	1	3.01	54	1	0	54	1	3.69	54	MP:0010898	abnormal pulmonary alveolus epithelium morphology
/fs0/chenr6/Database_fs0/MGI/processing/term.gene/MP:0010899 (22)	MP:0010899	1	1.89	185	1	3.52	185	1	1.79	185	MP:0010899	abnormal pulmonary alveolar system morphology
/fs0/chenr6/Database_fs0/MGI/processing/term.gene/MP:0010901 (8)	MP:0010901	1	3.01	61	1	0	61	1	3.69	61	MP:0010901	abnormal pulmonary alveolar parenchyma morphology
/fs0/chenr6/Database_fs0/MGI/processing/term.gene/MP:0010911 (21)	MP:0010911	1	2.02	177	1	3.52	177	1	1.97	177	MP:0010911	abnormal pulmonary acinus morphology
/fs0/chenr6/Database_fs0/MGI/processing/term.gene/MP:0010954 (9)	MP:0010954	1	1.43	101	1	3.52	101	1	0	101	MP:0010954	abnormal cellular respiration
/fs0/chenr6/Database_fs0/MGI/processing/term.gene/MP:0010955 (8)	MP:0010955	1	0.71	60	1	1.75	60	1	0	60	MP:0010955	abnormal respiratory electron transport chain
/fs0/chenr6/Database_fs0/MGI/processing/term.gene/MP:0011019 (8)	MP:0011019	1	1.67	57	1	1.31	57	1	2.44	57	MP:0011019	abnormal adaptive thermogenesis
/fs0/chenr6/Database_fs0/MGI/processing/term.gene/MP:0011088 (21)	MP:0011088	1	3.82	255	1	2.27	255	1	6	255	MP:0011088	neonatal lethality, incomplete penetrance
/fs0/chenr6/Database_fs0/MGI/processing/term.gene/MP:0011089 (19)	MP:0011089	1	4.59	217	1	6.36	217	1	4.93	217	MP:0011089	perinatal lethality, complete penetrance
/fs0/chenr6/Database_fs0/MGI/processing/term.gene/MP:0011090 (16)	MP:0011090	1	5.09	228	1	15.94	228	1	3.54	228	MP:0011090	perinatal lethality, incomplete penetrance
/fs0/chenr6/Database_fs0/MGI/processing/term.gene/MP:0011094 (13)	MP:0011094	1	2.23	128	1	3.98	128	1	0.97	128	MP:0011094	embryonic lethality before implantation, complete penetrance
/fs0/chenr6/Database_fs0/MGI/processing/term.gene/MP:0011096 (17)	MP:0011096	1	2.75	245	1	2.65	245	1	2.46	245	MP:0011096	embryonic lethality between implantation and somite formation, complete penetrance
/fs0/chenr6/Database_fs0/MGI/processing/term.gene/MP:0011097 (7)	MP:0011097	1	6.72	72	1	5.25	72	1	7.39	72	MP:0011097	embryonic lethality between somite formation and embryo turning, complete penetrance
/fs0/chenr6/Database_fs0/MGI/processing/term.gene/MP:0011100 (77)	MP:0011100	1	1.44	743	1	1.08	743	1	2.09	743	MP:0011100	preweaning lethality, complete penetrance
/fs0/chenr6/Database_fs0/MGI/processing/term.gene/MP:0011101 (19)	MP:0011101	1	3.7	295	1	2.11	295	1	6	295	MP:0011101	prenatal lethality, incomplete penetrance
/fs0/chenr6/Database_fs0/MGI/processing/term.gene/MP:0011110 (50)	MP:0011110	1	2.2	405	1	4.08	405	1	1.22	405	MP:0011110	preweaning lethality, incomplete penetrance
/fs0/chenr6/Database_fs0/MGI/processing/term.gene/MP:0011117 (15)	MP:0011117	1	2.52	203	1	3.18	203	1	1.96	203	MP:0011117	abnormal susceptibility to weight gain
/fs0/chenr6/Database_fs0/MGI/processing/term.gene/MP:0011156 (10)	MP:0011156	1	0.55	94	1	0	94	1	1.22	94	MP:0011156	abnormal hypodermis fat layer morphology
/fs0/chenr6/Database_fs0/MGI/processing/term.gene/MP:0011181 (83)	MP:0011181	1	1.99	955	1	2.89	955	1	1.53	955	MP:0011181	increased hematopoietic cell number
/fs0/chenr6/Database_fs0/MGI/processing/term.gene/MP:0011186 (6)	MP:0011186	1	2.5	56	1	5.25	56	1	1.63	56	MP:0011186	abnormal visceral endoderm morphology
/fs0/chenr6/Database_fs0/MGI/processing/term.gene/MP:0011203 (12)	MP:0011203	1	7.12	120	1	5.31	120	1	9.91	120	MP:0011203	abnormal parietal yolk sac morphology
/fs0/chenr6/Database_fs0/MGI/processing/term.gene/MP:0011239 (8)	MP:0011239	1	1.67	86	1	0	86	1	1.63	86	MP:0011239	abnormal skin coloration
/fs0/chenr6/Database_fs0/MGI/processing/term.gene/MP:0011275 (1)	MP:0011275	1	0	53	1	0	53	1	0	53	MP:0011275	abnormal behavioral response to light
/fs0/chenr6/Database_fs0/MGI/processing/term.gene/MP:0011339 (7)	MP:0011339	1	3.77	63	1	0	63	1	4.93	63	MP:0011339	abnormal glomerular mesangium morphology
/fs0/chenr6/Database_fs0/MGI/processing/term.gene/MP:0011380 (13)	MP:0011380	1	5.93	101	1	5.34	101	1	7.39	101	MP:0011380	enlarged brain ventricles
/fs0/chenr6/Database_fs0/MGI/processing/term.gene/MP:0011385 (7)	MP:0011385	1	0	60	1	0	60	1	0	60	MP:0011385	abnormal testosterone level
/fs0/chenr6/Database_fs0/MGI/processing/term.gene/MP:0011396 (8)	MP:0011396	1	1.67	117	1	3.52	117	1	0	117	MP:0011396	abnormal sleep behavior
/fs0/chenr6/Database_fs0/MGI/processing/term.gene/MP:0011479 (10)	MP:0011479	1	3.35	118	1	0	118	1	3.96	118	MP:0011479	abnormal catecholamine level
/fs0/chenr6/Database_fs0/MGI/processing/term.gene/MP:0011495 (2)	MP:0011495	1	Inf	66	1	Inf	66	1	Inf	66	MP:0011495	abnormal head shape
/fs0/chenr6/Database_fs0/MGI/processing/term.gene/MP:0011496 (9)	MP:0011496	1	6.32	86	1	5.31	86	1	14.79	86	MP:0011496	abnormal head size
/fs0/chenr6/Database_fs0/MGI/processing/term.gene/MP:0011497 (5)	MP:0011497	1	3.34	50	1	0	50	1	3.27	50	MP:0011497	abnormal glomerular capsule visceral layer morphology
/fs0/chenr6/Database_fs0/MGI/processing/term.gene/MP:0011504 (31)	MP:0011504	1	1.75	358	1	3.35	358	1	1.4	358	MP:0011504	abnormal limb long bone morphology
/fs0/chenr6/Database_fs0/MGI/processing/term.gene/MP:0011655 (21)	MP:0011655	1	3.82	193	1	8.13	193	1	1.47	193	MP:0011655	abnormal systemic artery morphology
/fs0/chenr6/Database_fs0/MGI/processing/term.gene/MP:0011702 (11)	MP:0011702	1	2.87	120	1	4.27	120	1	0	120	MP:0011702	abnormal fibroblast proliferation
/fs0/chenr6/Database_fs0/MGI/processing/term.gene/MP:0011704 (9)	MP:0011704	1	2.51	84	1	3.98	84	1	0	84	MP:0011704	decreased fibroblast proliferation
/fs0/chenr6/Database_fs0/MGI/processing/term.gene/MP:0011719 (3)	MP:0011719	1	2.5	58	1	5.25	58	1	0	58	MP:0011719	abnormal natural killer cell mediated cytotoxicity
/fs0/chenr6/Database_fs0/MGI/processing/term.gene/MP:0011750 (11)	MP:0011750	1	2.87	82	1	0	82	1	4.95	82	MP:0011750	abnormal seminiferous tubule epithelium morphology
/fs0/chenr6/Database_fs0/MGI/processing/term.gene/MP:0011762 (22)	MP:0011762	1	1.89	148	1	0.87	148	1	2.47	148	MP:0011762	renal/urinary system inflammation
/fs0/chenr6/Database_fs0/MGI/processing/term.gene/MP:0011888 (9)	MP:0011888	1	2.51	78	1	1.31	78	1	4.93	78	MP:0011888	abnormal circulating total protein level
/fs0/chenr6/Database_fs0/MGI/processing/term.gene/MP:0011898 (17)	MP:0011898	1	1.54	199	1	3.52	199	1	0.97	199	MP:0011898	abnormal platelet cell number
/fs0/chenr6/Database_fs0/MGI/processing/term.gene/MP:0011913 (5)	MP:0011913	1	3.34	69	1	0	69	1	3.27	69	MP:0011913	abnormal reticulocyte cell number
/fs0/chenr6/Database_fs0/MGI/processing/term.gene/MP:0011939 (16)	MP:0011939	1	1.15	121	1	1.31	121	1	0.97	121	MP:0011939	increased food intake
/fs0/chenr6/Database_fs0/MGI/processing/term.gene/MP:0011940 (8)	MP:0011940	1	0.71	78	1	1.31	78	1	0	78	MP:0011940	decreased food intake
/fs0/chenr6/Database_fs0/MGI/processing/term.gene/MP:0011941 (6)	MP:0011941	1	2.5	84	1	2.62	84	1	2.44	84	MP:0011941	increased fluid intake
/fs0/chenr6/Database_fs0/MGI/processing/term.gene/MP:0011947 (9)	MP:0011947	1	1.43	109	1	1.31	109	1	1.63	109	MP:0011947	abnormal fluid intake
/fs0/chenr6/Database_fs0/MGI/processing/term.gene/MP:0011967 (24)	MP:0011967	1	4.34	291	1	5.41	291	1	2.75	291	MP:0011967	increased or absent threshold for auditory brainstem response
/fs0/chenr6/Database_fs0/MGI/processing/term.gene/MP:0011969 (33)	MP:0011969	1	1.35	311	1	1.44	311	1	1.31	311	MP:0011969	abnormal circulating triglyceride level
/fs0/chenr6/Database_fs0/MGI/processing/term.gene/MP:0011977 (8)	MP:0011977	1	0.71	139	1	0	139	1	1.22	139	MP:0011977	abnormal sodium ion homeostasis
/fs0/chenr6/Database_fs0/MGI/processing/term.gene/MP:0011978 (12)	MP:0011978	1	2.51	94	1	1.05	94	1	3.69	94	MP:0011978	abnormal potassium ion homeostasis
/fs0/chenr6/Database_fs0/MGI/processing/term.gene/MP:0011997 (8)	MP:0011997	1	1.67	83	1	2.62	83	1	1.22	83	MP:0011997	abnormal retinal outer nuclear layer thickness
/fs0/chenr6/Database_fs0/MGI/processing/term.gene/MP:0011999 (3)	MP:0011999	1	2.5	84	1	5.25	84	1	0	84	MP:0011999	abnormal tail length
/fs0/chenr6/Database_fs0/MGI/processing/term.gene/MP:0012007 (10)	MP:0012007	1	1.25	98	1	1.05	98	1	1.63	98	MP:0012007	abnormal chloride level
/fs0/chenr6/Database_fs0/MGI/processing/term.gene/MP:0012057 (7)	MP:0012057	1	12.64	71	1	15.94	71	1	9.81	71	MP:0012057	abnormal mural trophectoderm morphology
/fs0/chenr6/Database_fs0/MGI/processing/term.gene/MP:0012064 (5)	MP:0012064	1	1.25	74	1	5.25	74	1	0	74	MP:0012064	abnormal astrocyte number
/fs0/chenr6/Database_fs0/MGI/processing/term.gene/MP:0012065 (5)	MP:0012065	1	1.25	73	1	5.25	73	1	0	73	MP:0012065	increased astrocyte number
/fs0/chenr6/Database_fs0/MGI/processing/term.gene/MP:0012079 (4)	MP:0012079	1	0	83	1	0	83	1	0	83	MP:0012079	abnormal spinal reflex
/fs0/chenr6/Database_fs0/MGI/processing/term.gene/MP:0012103 (3)	MP:0012103	1	2.5	60	1	2.62	60	1	0	60	MP:0012103	abnormal bilaminar embryonic disk morphology
/fs0/chenr6/Database_fs0/MGI/processing/term.gene/MP:0012167 (7)	MP:0012167	1	2	54	1	1.75	54	1	2.44	54	MP:0012167	abnormal epigenetic regulation of gene expression
/fs0/chenr6/Database_fs0/MGI/processing/term.gene/MP:0012224 (44)	MP:0012224	1	1.91	475	1	1.68	475	1	2.5	475	MP:0012224	abnormal sterol level
/fs0/chenr6/Database_fs0/MGI/processing/term.gene/MP:0012225 (23)	MP:0012225	1	2.21	262	1	0.95	262	1	4.28	262	MP:0012225	decreased sterol level
/fs0/chenr6/Database_fs0/MGI/processing/term.gene/MP:0012226 (23)	MP:0012226	1	1.78	242	1	2.67	242	1	1.22	242	MP:0012226	increased sterol level
/fs0/chenr6/Database_fs0/MGI/processing/term.gene/MP:0012315 (7)	MP:0012315	1	6.72	64	1	15.94	64	1	2.44	64	MP:0012315	impaired learning
/fs0/chenr6/Database_fs0/MGI/processing/term.gene/MP:0012317 (7)	MP:0012317	1	6.72	84	1	7.97	84	1	4.88	84	MP:0012317	impaired conditioning behavior
/fs0/chenr6/Database_fs0/MGI/processing/term.gene/MP:0012323 (23)	MP:0012323	1	1.78	251	1	2.66	251	1	0.97	251	MP:0012323	increased total tissue mass
/fs0/chenr6/Database_fs0/MGI/processing/term.gene/MP:0012349 (4)	MP:0012349	1	5.01	95	1	5.25	95	1	4.88	95	MP:0012349	increased susceptibility to induction of seizure by inducing agent
/fs0/chenr6/Database_fs0/MGI/processing/term.gene/MP:0012431 (14)	MP:0012431	1	3.79	145	1	6.73	145	1	1.22	145	MP:0012431	increased lymphoma incidence
/fs0/chenr6/Database_fs0/MGI/processing/term.gene/MP:0012440 (27)	MP:0012440	1	2.13	247	1	3.55	247	1	1.51	247	MP:0012440	abnormal neutrophil cell number
/fs0/chenr6/Database_fs0/MGI/processing/term.gene/MP:0012441 (18)	MP:0012441	1	1.93	179	1	3.98	179	1	1.22	179	MP:0012441	abnormal monocyte cell number
/fs0/chenr6/Database_fs0/MGI/processing/term.gene/MP:0012501 (12)	MP:0012501	1	5.06	105	1	5.31	105	1	4.93	105	MP:0012501	abnormal pericardial cavity morphology
/fs0/chenr6/Database_fs0/MGI/processing/term.gene/MP:0012542 (9)	MP:0012542	1	10.14	68	1	10.55	68	1	9.91	68	MP:0012542	abnormal neuropore morphology
/fs0/chenr6/Database_fs0/MGI/processing/term.gene/MP:0012543 (8)	MP:0012543	1	8.42	65	1	10.55	65	1	7.39	65	MP:0012543	abnormal rostral neuropore morphology
/fs0/chenr6/Database_fs0/MGI/processing/term.gene/MP:0012555 (14)	MP:0012555	1	5.08	171	1	3.52	171	1	4.97	171	MP:0012555	decreased cell death
/fs0/chenr6/Database_fs0/MGI/processing/term.gene/MP:0012676 (8)	MP:0012676	1	5.04	70	1	7.97	70	1	4.88	70	MP:0012676	dilated brain ventricles
/fs0/chenr6/Database_fs0/MGI/processing/term.gene/MP:0012762 (37)	MP:0012762	1	2.45	541	1	2.48	541	1	2.91	541	MP:0012762	abnormal alpha-beta T cell morphology
/fs0/chenr6/Database_fs0/MGI/processing/term.gene/MP:0012763 (30)	MP:0012763	1	1.84	447	1	1.58	447	1	2.06	447	MP:0012763	abnormal alpha-beta T cell number
/fs0/chenr6/Database_fs0/MGI/processing/term.gene/MP:0012764 (13)	MP:0012764	1	1.5	195	1	2.11	195	1	0.97	195	MP:0012764	increased alpha-beta T cell number
/fs0/chenr6/Database_fs0/MGI/processing/term.gene/MP:0012765 (19)	MP:0012765	1	2.33	275	1	0.87	275	1	3.54	275	MP:0012765	decreased alpha-beta T cell number
/fs0/chenr6/Database_fs0/MGI/processing/term.gene/MP:0012773 (3)	MP:0012773	1	0	50	1	0	50	1	0	50	MP:0012773	abnormal CD4-positive, CD25-positive, alpha-beta regulatory T cell number
/fs0/chenr6/Database_fs0/MGI/processing/term.gene/MP:0012775 (11)	MP:0012775	1	4.21	79	1	7.13	79	1	2.45	79	MP:0012775	abnormal brain weight
/fs0/chenr6/Database_fs0/MGI/processing/term.gene/MP:0012778 (13)	MP:0012778	1	1.5	125	1	2.64	125	1	0.81	125	MP:0012778	abnormal liver triglyceride level
/fs0/chenr6/Database_fs0/MGI/processing/term.gene/MP:0013151 (18)	MP:0013151	1	3.22	183	1	3.83	183	1	2.45	183	MP:0013151	abnormal incidence of induced tumors
/fs0/chenr6/Database_fs0/MGI/processing/term.gene/MP:0013189 (14)	MP:0013189	1	5.08	156	1	21.4	156	1	2.82	156	MP:0013189	abnormal exploration in a new environment
/fs0/chenr6/Database_fs0/MGI/processing/term.gene/MP:0013202 (23)	MP:0013202	1	1.39	199	1	2.27	199	1	1.33	199	MP:0013202	abnormal cilium morphology
/fs0/chenr6/Database_fs0/MGI/processing/term.gene/MP:0013203 (7)	MP:0013203	1	3.77	76	1	3.52	76	1	9.81	76	MP:0013203	abnormal primary cilium morphology
/fs0/chenr6/Database_fs0/MGI/processing/term.gene/MP:0013206 (17)	MP:0013206	1	0.66	134	1	1.05	134	1	0.48	134	MP:0013206	abnormal motile cilium morphology
/fs0/chenr6/Database_fs0/MGI/processing/term.gene/MP:0013229 (13)	MP:0013229	1	5.93	106	1	5.34	106	1	7.39	106	MP:0013229	abnormal brain ventricle size
/fs0/chenr6/Database_fs0/MGI/processing/term.gene/MP:0013277 (16)	MP:0013277	1	1.67	129	1	0.75	129	1	2.46	129	MP:0013277	abnormal fasting circulating glucose level
/fs0/chenr6/Database_fs0/MGI/processing/term.gene/MP:0013278 (6)	MP:0013278	1	0	57	1	0	57	1	0	57	MP:0013278	decreased fasting circulating glucose level
/fs0/chenr6/Database_fs0/MGI/processing/term.gene/MP:0013279 (9)	MP:0013279	1	4.03	76	1	1.31	76	1	7.39	76	MP:0013279	increased fasting circulating glucose level
/fs0/chenr6/Database_fs0/MGI/processing/term.gene/MP:0013292 (59)	MP:0013292	1	2.46	649	1	1.78	649	1	3.06	649	MP:0013292	embryonic lethality prior to organogenesis
/fs0/chenr6/Database_fs0/MGI/processing/term.gene/MP:0013293 (65)	MP:0013293	1	2.48	711	1	1.96	711	1	2.89	711	MP:0013293	embryonic lethality prior to tooth bud stage
/fs0/chenr6/Database_fs0/MGI/processing/term.gene/MP:0013294 (12)	MP:0013294	1	1	59	1	1.05	59	1	0.97	59	MP:0013294	prenatal lethality prior to heart atrial septation
/fs0/chenr6/Database_fs0/MGI/processing/term.gene/MP:0013296 (5)	MP:0013296	1	0	89	1	0	89	1	0	89	MP:0013296	abnormal susceptibility to induced colitis
/fs0/chenr6/Database_fs0/MGI/processing/term.gene/MP:0013324 (28)	MP:0013324	1	1.68	274	1	0.75	274	1	2.12	274	MP:0013324	abnormal female reproductive gland morphology
/fs0/chenr6/Database_fs0/MGI/processing/term.gene/MP:0013325 (65)	MP:0013325	1	1.26	617	1	1.45	617	1	1.36	617	MP:0013325	abnormal male reproductive gland morphology
/fs0/chenr6/Database_fs0/MGI/processing/term.gene/MP:0013330 (21)	MP:0013330	1	0.83	144	1	1.5	144	1	0.97	144	MP:0013330	abnormal male accessory sex gland morphology
/fs0/chenr6/Database_fs0/MGI/processing/term.gene/MP:0013503 (9)	MP:0013503	1	2.51	135	1	0	135	1	3.69	135	MP:0013503	abnormal embryonic tissue cell apoptosis
/fs0/chenr6/Database_fs0/MGI/processing/term.gene/MP:0013504 (9)	MP:0013504	1	2.51	110	1	0	110	1	3.69	110	MP:0013504	increased embryonic tissue cell apoptosis
/fs0/chenr6/Database_fs0/MGI/processing/term.gene/MP:0013543 (5)	MP:0013543	1	0	59	1	0	59	1	0	59	MP:0013543	abnormal holocrine gland morphology
/fs0/chenr6/Database_fs0/MGI/processing/term.gene/MP:0013544 (7)	MP:0013544	1	6.72	63	1	10.55	63	1	7.39	63	MP:0013544	abnormal merocrine gland morphology
/fs0/chenr6/Database_fs0/MGI/processing/term.gene/MP:0013545 (9)	MP:0013545	1	6.32	73	1	Inf	73	1	4.9	73	MP:0013545	cleft hard palate
/fs0/chenr6/Database_fs0/MGI/processing/term.gene/MP:0013550 (15)	MP:0013550	1	3.37	134	1	6.73	134	1	3.27	134	MP:0013550	abnormal secondary palate morphology
/fs0/chenr6/Database_fs0/MGI/processing/term.gene/MP:0013554 (11)	MP:0013554	1	2.87	155	1	5.28	155	1	2.95	155	MP:0013554	abnormal apocrine gland morphology
/fs0/chenr6/Database_fs0/MGI/processing/term.gene/MP:0013555 (3)	MP:0013555	1	2.5	74	1	0	74	1	4.88	74	MP:0013555	abnormal apocrine gland physiology
/fs0/chenr6/Database_fs0/MGI/processing/term.gene/MP:0013558 (46)	MP:0013558	1	2.01	518	1	2.3	518	1	2.22	518	MP:0013558	abnormal exocrine gland morphology
/fs0/chenr6/Database_fs0/MGI/processing/term.gene/MP:0013559 (9)	MP:0013559	1	4.03	151	1	5.28	151	1	3.27	151	MP:0013559	abnormal exocrine gland physiology
/fs0/chenr6/Database_fs0/MGI/processing/term.gene/MP:0013561 (28)	MP:0013561	1	1.68	282	1	1.58	282	1	1.51	282	MP:0013561	abnormal endocrine gland physiology
/fs0/chenr6/Database_fs0/MGI/processing/term.gene/MP:0013660 (7)	MP:0013660	1	3.77	77	1	2.62	77	1	4.9	77	MP:0013660	abnormal bone marrow hematopoietic cell morphology
/fs0/chenr6/Database_fs0/MGI/processing/term.gene/MP:0013661 (33)	MP:0013661	1	1.9	411	1	2.66	411	1	1.64	411	MP:0013661	abnormal myeloid cell number
/fs0/chenr6/Database_fs0/MGI/processing/term.gene/MP:0013662 (22)	MP:0013662	1	1.11	285	1	1.5	285	1	0.88	285	MP:0013662	decreased myeloid cell number
/fs0/chenr6/Database_fs0/MGI/processing/term.gene/MP:0013663 (16)	MP:0013663	1	3.03	199	1	5.28	199	1	2.82	199	MP:0013663	increased myeloid cell number
/fs0/chenr6/Database_fs0/MGI/processing/term.gene/MP:0013664 (11)	MP:0013664	1	4.21	106	1	3.98	106	1	4.9	106	MP:0013664	abnormal immature B cell number
/fs0/chenr6/Database_fs0/MGI/processing/term.gene/MP:0013701 (23)	MP:0013701	1	2.7	263	1	1.76	263	1	4.14	263	MP:0013701	abnormal mature B cell number
/fs0/chenr6/Database_fs0/MGI/processing/term.gene/MP:0013754 (3)	MP:0013754	1	Inf	53	1	Inf	53	1	Inf	53	MP:0013754	abnormal ocular surface morphology
/fs0/chenr6/Database_fs0/MGI/processing/term.gene/MP:0013760 (8)	MP:0013760	1	1.67	95	1	0	95	1	3.27	95	MP:0013760	abnormal T-helper cell morphology
/fs0/chenr6/Database_fs0/MGI/processing/term.gene/MP:0013761 (5)	MP:0013761	1	0	65	1	0	65	1	0	65	MP:0013761	abnormal T-helper cell number
/fs0/chenr6/Database_fs0/MGI/processing/term.gene/MP:0013762 (10)	MP:0013762	1	0	143	1	0	143	1	0	143	MP:0013762	abnormal effector T cell number
/fs0/chenr6/Database_fs0/MGI/processing/term.gene/MP:0013802 (21)	MP:0013802	1	3.82	166	1	4.27	166	1	3.54	166	MP:0013802	abnormal IgG2 level
/fs0/chenr6/Database_fs0/MGI/processing/term.gene/MP:0013803 (13)	MP:0013803	1	4.34	84	1	5.31	84	1	3.69	84	MP:0013803	increased IgG2 level
/fs0/chenr6/Database_fs0/MGI/processing/term.gene/MP:0013804 (13)	MP:0013804	1	4.34	97	1	3.98	97	1	4.93	97	MP:0013804	decreased IgG2 level
/fs0/chenr6/Database_fs0/MGI/processing/term.gene/MP:0014137 (17)	MP:0014137	1	4.52	178	1	3.55	178	1	6.6	178	MP:0014137	abnormal preimplantation embryo morphology
/fs0/chenr6/Database_fs0/MGI/processing/term.gene/MP:0014138 (10)	MP:0014138	1	7.6	135	1	21.4	135	1	3.69	135	MP:0014138	abnormal germ layer morphology
/fs0/chenr6/Database_fs0/MGI/processing/term.gene/MP:0014141 (7)	MP:0014141	1	6.72	107	1	10.55	107	1	3.27	107	MP:0014141	abnormal mesoderm morphology
/fs0/chenr6/Database_fs0/MGI/processing/term.gene/MP:0014195 (14)	MP:0014195	1	0.83	125	1	1.31	125	1	0.54	125	MP:0014195	abnormal endocrine pancreas secretion
/fs0/chenr6/Database_fs0/MGI/processing/term.gene/MP:0020151 (13)	MP:0020151	1	3.15	123	1	1.75	123	1	9.91	123	MP:0020151	abnormal circulating non-HDL cholesterol level
/fs0/chenr6/Database_fs0/MGI/processing/term.gene/MP:0020152 (6)	MP:0020152	1	2.5	63	1	0	63	1	3.27	63	MP:0020152	abnormal oocyte number
/fs0/chenr6/Database_fs0/MGI/processing/term.gene/MP:0020167 (15)	MP:0020167	1	3.37	190	1	10.85	190	1	0.81	190	MP:0020167	abnormal vertical activity
/fs0/chenr6/Database_fs0/MGI/processing/term.gene/MP:0020171 (14)	MP:0020171	1	3.79	101	1	2.11	101	1	4.95	101	MP:0020171	abnormal IgA level
/fs0/chenr6/Database_fs0/MGI/processing/term.gene/MP:0020173 (9)	MP:0020173	1	4.03	112	1	1.31	112	1	14.79	112	MP:0020173	abnormal IgE level
/fs0/chenr6/Database_fs0/MGI/processing/term.gene/MP:0020175 (17)	MP:0020175	1	5.75	174	1	5.34	174	1	6.22	174	MP:0020175	abnormal IgG1 level
/fs0/chenr6/Database_fs0/MGI/processing/term.gene/MP:0020176 (20)	MP:0020176	1	3.39	132	1	4.27	132	1	2.82	132	MP:0020176	abnormal IgG2a level
/fs0/chenr6/Database_fs0/MGI/processing/term.gene/MP:0020177 (15)	MP:0020177	1	4.44	92	1	5.31	92	1	3.96	92	MP:0020177	abnormal IgG2b level
/fs0/chenr6/Database_fs0/MGI/processing/term.gene/MP:0020179 (14)	MP:0020179	1	3.79	96	1	7.13	96	1	1.96	96	MP:0020179	abnormal IgG3 level
/fs0/chenr6/Database_fs0/MGI/processing/term.gene/MP:0020184 (11)	MP:0020184	1	6.08	107	1	1.75	107	1	12.45	107	MP:0020184	altered susceptibility to parasitic infection
/fs0/chenr6/Database_fs0/MGI/processing/term.gene/MP:0020185 (10)	MP:0020185	1	3.35	139	1	0	139	1	6.6	139	MP:0020185	altered susceptibility to viral infection
/fs0/chenr6/Database_fs0/MGI/processing/term.gene/MP:0020186 (22)	MP:0020186	1	2.9	275	1	1.31	275	1	5.02	275	MP:0020186	altered susceptibility to bacterial infection
/fs0/chenr6/Database_fs0/MGI/processing/term.gene/MP:0020189 (9)	MP:0020189	1	6.32	102	1	5.28	102	1	7.39	102	MP:0020189	abnormal adenoma incidence
/fs0/chenr6/Database_fs0/MGI/processing/term.gene/MP:0020201 (45)	MP:0020201	1	2.85	403	1	3.8	403	1	2.51	403	MP:0020201	abnormal granulocyte number
/fs0/chenr6/Database_fs0/MGI/processing/term.gene/MP:0020202 (12)	MP:0020202	1	3.6	186	1	15.94	186	1	1.96	186	MP:0020202	abnormal macrophage cell number
/fs0/chenr6/Database_fs0/MGI/processing/term.gene/MP:0020414 (17)	MP:0020414	1	4.52	179	1	6.5	179	1	2.45	179	MP:0020414	abnormal fibroblast physiology

## Sheet: ST3 GO
ST3 GSEA with biological process terms of GO and significant terms of allHRGs are listed here.
		allHRG					sigHRG					subHRG
term	description	n_allHRG	n_total_allHRG	bg_allHRG	bg_total_allHRG	allHRG	n_sigHRG	n_all_sigHRG	bg_sigHRG	bg_all_sigHRG	sigHRG	n_subHRG	n_all_subHRG	bg_subHRG	bg_all_subHRG	subHRG
GO:0048731	system development	159	290	4767	17846	8.22905e-21	74	126	4767	17846	1.18397e-10	88	171	4767	17846	5.55049e-09
GO:0022008	neurogenesis	86	290	1606	17846	8.22905e-21	38	126	1606	17846	4.87143e-09	49	171	1606	17846	4.02148e-10
GO:0007399	nervous system development	105	290	2355	17846	1.76897e-20	49	126	2355	17846	3.49305e-10	58	171	2355	17846	5.0896e-09
GO:0048856	anatomical structure development	175	290	5848	17846	3.22934e-19	81	126	5848	17846	3.49305e-10	97	171	5848	17846	6.08302e-08
GO:0048699	generation of neurons	79	290	1509	17846	1.74095e-18	35	126	1509	17846	5.15182e-08	44	171	1509	17846	1.2061e-08
GO:0007275	multicellular organism development	162	290	5339	17846	1.4793e-17	75	126	5339	17846	3.29102e-09	90	171	5339	17846	1.69825e-07
GO:0032502	developmental process	178	290	6260	17846	2.37245e-17	82	126	6260	17846	3.49802e-09	99	171	6260	17846	3.11704e-07
GO:0009653	anatomical structure morphogenesis	104	290	2640	17846	1.55391e-16	53	126	2640	17846	1.88373e-10	53	171	2640	17846	7.83163e-06
GO:0051239	regulation of multicellular organismal process	113	290	3084	17846	4.85767e-16	53	126	3084	17846	1.8729e-08	62	171	3084	17846	6.10504e-07
GO:0048869	cellular developmental process	138	290	4339	17846	1.67984e-15	61	126	4339	17846	8.0706e-07	80	171	4339	17846	6.21092e-08
GO:0030182	neuron differentiation	69	290	1356	17846	2.47628e-15	31	126	1356	17846	8.0706e-07	38	171	1356	17846	4.74196e-07
GO:0030154	cell differentiation	133	290	4154	17846	5.6299e-15	58	126	4154	17846	2.51582e-06	78	171	4154	17846	6.08302e-08
GO:0048468	cell development	89	290	2155	17846	6.13376e-15	39	126	2155	17846	2.51582e-06	51	171	2155	17846	1.69825e-07
GO:0032501	multicellular organismal process	191	290	7610	17846	2.75679e-13	87	126	7610	17846	5.02616e-07	108	171	7610	17846	7.83163e-06
GO:0016043	cellular component organization	171	290	6431	17846	3.25007e-13	83	126	6431	17846	4.27089e-09	93	171	6431	17846	5.05162e-05
GO:0060284	regulation of cell development	52	290	926	17846	8.6989e-13	24	126	926	17846	3.96234e-06	29	171	926	17846	3.69699e-06
GO:0071840	cellular component organization or biogenesis	173	290	6618	17846	9.15944e-13	84	126	6618	17846	5.36429e-09	95	171	6618	17846	4.93173e-05
GO:2000026	regulation of multicellular organismal development	80	290	2000	17846	2.02491e-12	38	126	2000	17846	1.22417e-06	44	171	2000	17846	1.13622e-05
GO:0048518	positive regulation of biological process	164	290	6155	17846	2.02491e-12	73	126	6155	17846	7.22085e-06	96	171	6155	17846	1.4338e-06
GO:0050767	regulation of neurogenesis	47	290	805	17846	4.35174e-12	21	126	805	17846	2.1062e-05	26	171	805	17846	7.83163e-06
GO:0050793	regulation of developmental process	91	290	2532	17846	8.60751e-12	44	126	2532	17846	8.56963e-07	49	171	2532	17846	4.99319e-05
GO:0048513	animal organ development	112	290	3519	17846	1.0846e-11	51	126	3519	17846	7.73672e-06	64	171	3519	17846	7.83163e-06
GO:0045595	regulation of cell differentiation	73	290	1785	17846	1.18935e-11	33	126	1785	17846	1.80447e-05	42	171	1785	17846	5.7822e-06
GO:0032989	cellular component morphogenesis	56	290	1145	17846	1.51711e-11	25	126	1145	17846	3.4118e-05	32	171	1145	17846	7.52963e-06
GO:0051960	regulation of nervous system development	49	290	910	17846	1.96255e-11	23	126	910	17846	1.01999e-05	27	171	910	17846	1.86466e-05
GO:0010646	regulation of cell communication	110	290	3470	17846	2.37973e-11	53	126	3470	17846	9.17365e-07	61	171	3470	17846	4.03919e-05
GO:0048583	regulation of response to stimulus	126	290	4271	17846	2.49297e-11	59	126	4271	17846	2.51582e-06	72	171	4271	17846	1.36527e-05
GO:0048666	neuron development	54	290	1103	17846	3.7909e-11	26	126	1103	17846	5.73402e-06	28	171	1103	17846	0.000116652
GO:0048522	positive regulation of cellular process	146	290	5365	17846	4.2554e-11	64	126	5365	17846	6.64108e-05	87	171	5365	17846	2.38088e-06
GO:0000902	cell morphogenesis	52	290	1038	17846	4.37854e-11	24	126	1038	17846	2.28573e-05	29	171	1038	17846	2.10884e-05
GO:0023051	regulation of signaling	110	290	3511	17846	4.46237e-11	53	126	3511	17846	1.25557e-06	61	171	3511	17846	5.05162e-05
GO:0031175	neuron projection development	49	290	972	17846	1.77629e-10	22	126	972	17846	8.20534e-05	27	171	972	17846	4.66324e-05
GO:0048667	cell morphogenesis involved in neuron differentiation	37	290	584	17846	1.92991e-10	15	126	584	17846	0.000677442	22	171	584	17846	7.83163e-06
GO:0022603	regulation of anatomical structure morphogenesis	51	290	1051	17846	2.27633e-10	24	126	1051	17846	2.78911e-05	28	171	1051	17846	5.72158e-05
GO:0000904	cell morphogenesis involved in differentiation	42	290	746	17846	2.40113e-10	18	126	746	17846	0.000268567	25	171	746	17846	7.83163e-06
GO:0032990	cell part morphogenesis	40	290	686	17846	2.79973e-10	16	126	686	17846	0.000967658	24	171	686	17846	7.76777e-06
GO:0048519	negative regulation of biological process	142	290	5301	17846	3.84769e-10	61	126	5301	17846	0.000350483	86	171	5301	17846	2.93097e-06
GO:0048858	cell projection morphogenesis	39	290	667	17846	4.73201e-10	16	126	667	17846	0.000741566	23	171	667	17846	1.36527e-05
GO:0007420	brain development	41	290	732	17846	4.75455e-10	21	126	732	17846	5.56734e-06	22	171	732	17846	0.000116574
GO:0051094	positive regulation of developmental process	58	290	1338	17846	4.75455e-10	27	126	1338	17846	4.57862e-05	32	171	1338	17846	8.16267e-05
GO:0050808	synapse organization	30	290	405	17846	5.0374e-10	14	126	405	17846	7.81896e-05	16	171	405	17846	0.000109369
GO:0060322	head development	42	290	775	17846	6.85762e-10	22	126	775	17846	3.45668e-06	22	171	775	17846	0.000226608
GO:0048523	negative regulation of cellular process	130	290	4702	17846	6.85762e-10	56	126	4702	17846	0.00038723	79	171	4702	17846	3.69699e-06
GO:0048812	neuron projection morphogenesis	38	290	649	17846	7.61828e-10	16	126	649	17846	0.000589489	22	171	649	17846	2.95376e-05
GO:0007267	cell-cell signaling	66	290	1677	17846	7.77407e-10	33	126	1677	17846	5.25061e-06	35	171	1677	17846	0.000314638
GO:0051240	positive regulation of multicellular organismal process	67	290	1721	17846	8.21778e-10	30	126	1721	17846	0.000155243	38	171	1721	17846	5.4565e-05
GO:0006928	movement of cell or subcellular component	76	290	2113	17846	1.05131e-09	37	126	2113	17846	1.04228e-05	41	171	2113	17846	0.000280502
GO:0050794	regulation of cellular process	231	290	10943	17846	1.08987e-09	104	126	10943	17846	2.01122e-05	134	171	10943	17846	8.43685e-05
GO:0120039	plasma membrane bounded cell projection morphogenesis	38	290	663	17846	1.29105e-09	16	126	663	17846	0.00070476	22	171	663	17846	3.62261e-05
GO:0061564	axon development	33	290	512	17846	1.4517e-09	14	126	512	17846	0.000671759	19	171	512	17846	4.17234e-05
GO:0007417	central nervous system development	47	290	995	17846	3.2786e-09	22	126	995	17846	0.000111453	27	171	995	17846	6.26735e-05
GO:0050896	response to stimulus	205	290	9262	17846	3.46562e-09	92	126	9262	17846	7.31194e-05	119	171	9262	17846	0.000104258
GO:0065008	regulation of biological quality	114	290	4001	17846	4.63036e-09	52	126	4001	17846	0.000108979	64	171	4001	17846	0.000254214
GO:0050789	regulation of biological process	239	290	11661	17846	5.46566e-09	107	126	11661	17846	5.35215e-05	139	171	11661	17846	0.000149835
GO:0065007	biological regulation	248	290	12373	17846	8.11827e-09	110	126	12373	17846	0.000124941	145	171	12373	17846	0.000123752
GO:0045664	regulation of neuron differentiation	36	290	645	17846	8.61108e-09	16	126	645	17846	0.000560141	20	171	645	17846	0.000176352
GO:0040011	locomotion	68	290	1869	17846	9.11552e-09	33	126	1869	17846	4.18354e-05	37	171	1869	17846	0.000485777
GO:0032879	regulation of localization	87	290	2724	17846	9.48178e-09	39	126	2724	17846	0.000329386	52	171	2724	17846	3.62261e-05
GO:0007409	axonogenesis	30	290	470	17846	1.39157e-08	13	126	470	17846	0.00101991	17	171	470	17846	0.000149835
GO:0030030	cell projection organization	60	290	1560	17846	1.66504e-08	27	126	1560	17846	0.000453451	33	171	1560	17846	0.000430249
GO:0009966	regulation of signal transduction	94	290	3098	17846	1.91596e-08	45	126	3098	17846	4.74394e-05	53	171	3098	17846	0.000331919
GO:0007166	cell surface receptor signaling pathway	94	290	3101	17846	1.98785e-08	44	126	3101	17846	0.000108979	53	171	3101	17846	0.000338049
GO:0042221	response to chemical	126	290	4748	17846	2.4369e-08	51	126	4748	17846	0.00839646	77	171	4748	17846	1.81529e-05
GO:0009605	response to external stimulus	88	290	2827	17846	2.45752e-08	37	126	2827	17846	0.00255896	54	171	2827	17846	2.26373e-05
GO:0042330	taxis	35	290	643	17846	2.70697e-08	15	126	643	17846	0.00159046	21	171	643	17846	6.43814e-05
GO:0010975	regulation of neuron projection development	30	290	491	17846	3.55156e-08	12	126	491	17846	0.00426719	18	171	491	17846	7.91276e-05
GO:0120036	plasma membrane bounded cell projection organization	58	290	1525	17846	4.90994e-08	26	126	1525	17846	0.000754165	32	171	1525	17846	0.000614162
GO:0010604	positive regulation of macromolecule metabolic process	97	290	3310	17846	5.28431e-08	41	126	3310	17846	0.00308799	61	171	3310	17846	1.12225e-05
GO:0010033	response to organic substance	96	290	3263	17846	5.41046e-08	39	126	3263	17846	0.00730819	59	171	3263	17846	2.97791e-05
GO:0023052	signaling	158	290	6609	17846	5.66286e-08	71	126	6609	17846	0.000362711	92	171	6609	17846	0.000236916
GO:0071310	cellular response to organic substance	84	290	2697	17846	6.56281e-08	34	126	2697	17846	0.00743922	52	171	2697	17846	2.9706e-05
GO:0045597	positive regulation of cell differentiation	43	290	951	17846	6.84125e-08	17	126	951	17846	0.00717004	26	171	951	17846	8.31359e-05
GO:0007154	cell communication	158	290	6638	17846	7.80936e-08	72	126	6638	17846	0.000232188	91	171	6638	17846	0.000482714
GO:0006935	chemotaxis	34	290	641	17846	8.44718e-08	14	126	641	17846	0.0042123	21	171	641	17846	6.26735e-05
GO:0051128	regulation of cellular component organization	78	290	2443	17846	1.01773e-07	35	126	2443	17846	0.000896247	44	171	2443	17846	0.000614162
GO:0051716	cellular response to stimulus	173	290	7570	17846	1.20829e-07	77	126	7570	17846	0.000700185	101	171	7570	17846	0.000314638
GO:0030029	actin filament-based process	37	290	757	17846	1.34674e-07	19	126	757	17846	0.000105835	19	171	757	17846	0.00270076
GO:0009893	positive regulation of metabolic process	101	290	3578	17846	1.38512e-07	44	126	3578	17846	0.00208908	62	171	3578	17846	4.66324e-05
GO:0050769	positive regulation of neurogenesis	28	290	462	17846	1.39044e-07	10	126	462	17846	0.02105	18	171	462	17846	4.17234e-05
GO:0050804	modulation of chemical synaptic transmission	27	290	436	17846	1.69639e-07	15	126	436	17846	4.11952e-05	13	171	436	17846	0.00517744
GO:0099177	regulation of trans-synaptic signaling	27	290	437	17846	1.74737e-07	15	126	437	17846	4.13204e-05	13	171	437	17846	0.00520614
GO:0051179	localization	158	290	6713	17846	1.74737e-07	73	126	6713	17846	0.000174299	90	171	6713	17846	0.00118957
GO:0070887	cellular response to chemical stimulus	94	290	3269	17846	2.49658e-07	39	126	3269	17846	0.007461	57	171	3269	17846	0.000104258
GO:0050803	regulation of synapse structure or activity	19	290	224	17846	2.63484e-07	9	126	224	17846	0.00108259	10	171	224	17846	0.00156616
GO:0120035	regulation of plasma membrane bounded cell projection organization	34	290	686	17846	4.04953e-07	13	126	686	17846	0.0167718	21	171	686	17846	0.000141711
GO:1905114	cell surface receptor signaling pathway involved in cell-cell signaling	34	290	686	17846	4.04953e-07	22	126	686	17846	6.70745e-07	14	171	686	17846	0.0465519
GO:0099173	postsynapse organization	16	290	161	17846	4.52221e-07	6	126	161	17846	0.0153182	10	171	161	17846	0.000167946
GO:0031344	regulation of cell projection organization	34	290	695	17846	5.47327e-07	13	126	695	17846	0.0181659	21	171	695	17846	0.000160178
GO:0051962	positive regulation of nervous system development	29	290	529	17846	6.03375e-07	11	126	529	17846	0.0187084	18	171	529	17846	0.000165358
GO:0010720	positive regulation of cell development	29	290	533	17846	7.04705e-07	11	126	533	17846	0.019469	18	171	533	17846	0.000176237
GO:0007155	cell adhesion	52	290	1402	17846	7.57079e-07	26	126	1402	17846	0.000243886	28	171	1402	17846	0.00324029
GO:0050807	regulation of synapse organization	18	290	215	17846	7.57079e-07	8	126	215	17846	0.00369696	10	171	215	17846	0.00120631
GO:0010628	positive regulation of gene expression	65	290	1971	17846	8.44422e-07	27	126	1971	17846	0.00904106	39	171	1971	17846	0.000310427
GO:0022610	biological adhesion	52	290	1409	17846	8.72891e-07	26	126	1409	17846	0.000260319	28	171	1409	17846	0.00348423
GO:0099536	synaptic signaling	35	290	748	17846	9.30568e-07	18	126	748	17846	0.00027036	18	171	748	17846	0.00520614
GO:0060341	regulation of cellular localization	39	290	902	17846	1.13712e-06	19	126	902	17846	0.00072779	21	171	902	17846	0.00312302
GO:0031325	positive regulation of cellular metabolic process	92	290	3283	17846	1.24507e-06	38	126	3283	17846	0.0141043	59	171	3283	17846	3.59346e-05
GO:0007416	synapse assembly	16	290	175	17846	1.32476e-06	8	126	175	17846	0.00119394	8	171	175	17846	0.00508056
GO:0045666	positive regulation of neuron differentiation	23	290	362	17846	1.33543e-06	10	126	362	17846	0.00515234	13	171	362	17846	0.00131105
GO:0007411	axon guidance	20	290	278	17846	1.42728e-06	7	126	278	17846	0.0358801	13	171	278	17846	0.000149835
GO:0097485	neuron projection guidance	20	290	279	17846	1.50024e-06	7	126	279	17846	0.0359897	13	171	279	17846	0.000149835
GO:0099537	trans-synaptic signaling	34	290	733	17846	1.74047e-06	18	126	733	17846	0.000231932	17	171	733	17846	0.00955238
GO:0051049	regulation of transport	61	290	1839	17846	1.9245e-06	26	126	1839	17846	0.00773889	37	171	1839	17846	0.000361244
GO:0051173	positive regulation of nitrogen compound metabolic process	88	290	3145	17846	2.94112e-06	36	126	3145	17846	0.0208461	57	171	3145	17846	4.17234e-05
GO:0050890	cognition	20	290	295	17846	3.62357e-06	10	126	295	17846	0.00154696	11	171	295	17846	0.00287459
GO:0007268	chemical synaptic transmission	33	290	725	17846	4.15828e-06	18	126	725	17846	0.000202513	16	171	725	17846	0.017864
GO:0098916	anterograde trans-synaptic signaling	33	290	725	17846	4.15828e-06	18	126	725	17846	0.000202513	16	171	725	17846	0.017864
GO:0022604	regulation of cell morphogenesis	26	290	483	17846	4.24042e-06	10	126	483	17846	0.0257904	16	171	483	17846	0.000571206
GO:2001257	regulation of cation channel activity	15	290	170	17846	5.2121e-06	9	126	170	17846	0.000202513	7	171	170	17846	0.0146193
GO:0010976	positive regulation of neuron projection development	19	290	275	17846	5.47112e-06	7	126	275	17846	0.034495	12	171	275	17846	0.000495429
GO:0051641	cellular localization	83	290	2948	17846	5.94711e-06	43	126	2948	17846	7.81896e-05	44	171	2948	17846	0.0153927
GO:0044093	positive regulation of molecular function	58	290	1769	17846	6.16087e-06	26	126	1769	17846	0.00491892	36	171	1769	17846	0.000378107
GO:0031346	positive regulation of cell projection organization	22	290	376	17846	9.9271e-06	8	126	376	17846	0.0446305	14	171	376	17846	0.000555178
GO:0060255	regulation of macromolecule metabolic process	142	290	6168	17846	1.03074e-05	57	126	6168	17846	0.062185	91	171	6168	17846	3.62261e-05
GO:0048584	positive regulation of response to stimulus	72	290	2470	17846	1.42139e-05	27	126	2470	17846	0.0815076	47	171	2470	17846	0.000112741
GO:0007165	signal transduction	141	290	6144	17846	1.45369e-05	65	126	6144	17846	0.0017132	81	171	6144	17846	0.00518397
GO:0009719	response to endogenous stimulus	55	290	1684	17846	1.51036e-05	24	126	1684	17846	0.0108279	32	171	1684	17846	0.00279807
GO:0099175	regulation of postsynapse organization	11	290	96	17846	1.75207e-05	4	126	96	17846	0.0422497	7	171	96	17846	0.00109585
GO:0010769	regulation of cell morphogenesis involved in differentiation	19	290	300	17846	1.93702e-05	6	126	300	17846	0.105859	13	171	300	17846	0.000278785
GO:0007610	behavior	28	290	596	17846	1.97649e-05	13	126	596	17846	0.00600469	16	171	596	17846	0.00389647
GO:0051270	regulation of cellular component movement	38	290	977	17846	2.05337e-05	20	126	977	17846	0.000685391	20	171	977	17846	0.013418
GO:1904062	regulation of cation transmembrane transport	20	290	333	17846	2.18306e-05	12	126	333	17846	0.000242781	9	171	333	17846	0.0384723
GO:0007215	glutamate receptor signaling pathway	11	290	100	17846	2.54866e-05	7	126	100	17846	0.000337578	5	171	100	17846	0.0259721
GO:0031532	actin cytoskeleton reorganization	11	290	101	17846	2.79663e-05	6	126	101	17846	0.00238249	6	171	101	17846	0.00671541
GO:0042063	gliogenesis	18	290	279	17846	2.83416e-05	6	126	279	17846	0.0875856	13	171	279	17846	0.000149835
GO:0010243	response to organonitrogen compound	39	290	1038	17846	3.26639e-05	15	126	1038	17846	0.0523472	24	171	1038	17846	0.00143668
GO:0032412	regulation of ion transmembrane transporter activity	17	290	254	17846	3.42575e-05	10	126	254	17846	0.000572326	8	171	254	17846	0.0287038
GO:0008283	cell population proliferation	59	290	1919	17846	3.56132e-05	25	126	1919	17846	0.0218391	37	171	1919	17846	0.000751877
GO:0007611	learning or memory	17	290	255	17846	3.56132e-05	9	126	255	17846	0.0024123	9	171	255	17846	0.0105897
GO:0071709	membrane assembly	7	290	34	17846	3.65304e-05	3	126	34	17846	0.0216137	4	171	34	17846	0.00517744
GO:1901700	response to oxygen-containing compound	53	290	1651	17846	3.89703e-05	24	126	1651	17846	0.00851641	30	171	1651	17846	0.0071371
GO:0030900	forebrain development	21	290	382	17846	4.4113e-05	9	126	382	17846	0.0208461	14	171	382	17846	0.000617703
GO:0006915	apoptotic process	59	290	1935	17846	4.52757e-05	24	126	1935	17846	0.0395988	37	171	1935	17846	0.000869231
GO:0022898	regulation of transmembrane transporter activity	17	290	262	17846	4.98015e-05	10	126	262	17846	0.000700185	8	171	262	17846	0.0327283
GO:0010468	regulation of gene expression	109	290	4487	17846	5.37021e-05	42	126	4487	17846	0.120516	70	171	4487	17846	0.000177168
GO:0022607	cellular component assembly	82	290	3069	17846	5.42194e-05	39	126	3069	17846	0.00287962	45	171	3069	17846	0.0182244
GO:0042391	regulation of membrane potential	22	290	423	17846	5.91012e-05	12	126	423	17846	0.00153741	11	171	423	17846	0.0247761
GO:0051234	establishment of localization	125	290	5386	17846	6.13218e-05	58	126	5386	17846	0.00324004	72	171	5386	17846	0.00861815
GO:0045935	positive regulation of nucleobase-containing compound metabolic process	57	290	1863	17846	6.15086e-05	24	126	1863	17846	0.0290636	35	171	1863	17846	0.00178422
GO:0051130	positive regulation of cellular component organization	42	290	1199	17846	6.59324e-05	17	126	1199	17846	0.0410124	25	171	1199	17846	0.00378622
GO:0045944	positive regulation of transcription by RNA polymerase II	42	290	1202	17846	6.87932e-05	16	126	1202	17846	0.0721389	27	171	1202	17846	0.000869231
GO:0048870	cell motility	52	290	1642	17846	6.87932e-05	27	126	1642	17846	0.000923905	27	171	1642	17846	0.0327283
GO:0051674	localization of cell	52	290	1642	17846	6.87932e-05	27	126	1642	17846	0.000923905	27	171	1642	17846	0.0327283
GO:1901698	response to nitrogen compound	40	290	1120	17846	7.22588e-05	15	126	1120	17846	0.080722	25	171	1120	17846	0.00165625
GO:0010721	negative regulation of cell development	19	290	332	17846	7.24231e-05	9	126	332	17846	0.00987704	10	171	332	17846	0.0155378
GO:0051171	regulation of nitrogen compound metabolic process	133	290	5864	17846	7.41846e-05	53	126	5864	17846	0.101989	86	171	5864	17846	0.000100923
GO:0071495	cellular response to endogenous stimulus	47	290	1427	17846	7.85998e-05	20	126	1427	17846	0.0269466	28	171	1427	17846	0.00400399
GO:0032409	regulation of transporter activity	17	290	274	17846	8.30162e-05	10	126	274	17846	0.000923905	8	171	274	17846	0.0391372
GO:0044091	membrane biogenesis	7	290	39	17846	8.44395e-05	3	126	39	17846	0.0290636	4	171	39	17846	0.00777657
GO:0070296	sarcoplasmic reticulum calcium ion transport	7	290	39	17846	8.44395e-05	5	126	39	17846	0.000362711	2	171	39	17846	0.196853
GO:1901701	cellular response to oxygen-containing compound	41	290	1172	17846	8.44608e-05	18	126	1172	17846	0.0198735	23	171	1172	17846	0.0108268
GO:0051254	positive regulation of RNA metabolic process	53	290	1703	17846	8.44608e-05	23	126	1703	17846	0.0216331	32	171	1703	17846	0.00322716
GO:0012501	programmed cell death	61	290	2076	17846	8.44608e-05	24	126	2076	17846	0.0707699	39	171	2076	17846	0.000763514
GO:0060078	regulation of postsynaptic membrane potential	12	290	139	17846	8.61409e-05	8	126	139	17846	0.000324935	5	171	139	17846	0.0695407
GO:1902680	positive regulation of RNA biosynthetic process	51	290	1619	17846	9.38947e-05	21	126	1619	17846	0.0410982	32	171	1619	17846	0.00156236
GO:0016477	cell migration	48	290	1484	17846	9.38947e-05	23	126	1484	17846	0.00534378	27	171	1484	17846	0.0115098
GO:0001941	postsynaptic membrane organization	7	290	40	17846	9.64381e-05	3	126	40	17846	0.0301061	4	171	40	17846	0.00837633
GO:0051241	negative regulation of multicellular organismal process	41	290	1183	17846	0.000101861	22	126	1183	17846	0.000951409	19	171	1183	17846	0.0986706
GO:0009628	response to abiotic stimulus	42	290	1226	17846	0.000101861	15	126	1226	17846	0.127433	27	171	1226	17846	0.0011781
GO:0051093	negative regulation of developmental process	35	290	933	17846	0.000102307	17	126	933	17846	0.00597882	19	171	933	17846	0.0170636
GO:0070838	divalent metal ion transport	23	290	477	17846	0.000104188	12	126	477	17846	0.00369696	11	171	477	17846	0.0465519
GO:0009887	animal organ morphogenesis	38	290	1061	17846	0.000110389	20	126	1061	17846	0.0017132	19	171	1061	17846	0.0466613
GO:0045637	regulation of myeloid cell differentiation	15	290	223	17846	0.000110389	8	126	223	17846	0.00426719	7	171	223	17846	0.0434562
GO:0030036	actin cytoskeleton organization	28	290	662	17846	0.000111765	13	126	662	17846	0.0128928	16	171	662	17846	0.00915239
GO:0007158	neuron cell-cell adhesion	5	290	16	17846	0.000115441	3	126	16	17846	0.0042123	2	171	16	17846	0.0648276
GO:0048534	hematopoietic or lymphoid organ development	34	290	899	17846	0.000115441	15	126	899	17846	0.0213744	21	171	899	17846	0.00304949
GO:0031328	positive regulation of cellular biosynthetic process	58	290	1962	17846	0.000120134	26	126	1962	17846	0.0166138	34	171	1962	17846	0.00686107
GO:0034762	regulation of transmembrane transport	25	290	555	17846	0.00012442	14	126	555	17846	0.00130873	12	171	555	17846	0.0521158
GO:0072511	divalent inorganic cation transport	23	290	484	17846	0.00012629	12	126	484	17846	0.00408387	11	171	484	17846	0.0504916
GO:0008219	cell death	63	290	2205	17846	0.00012636	24	126	2205	17846	0.106181	41	171	2205	17846	0.000614162
GO:0060079	excitatory postsynaptic potential	10	290	99	17846	0.00012885	7	126	99	17846	0.000324935	3	171	99	17846	0.231598
GO:0044085	cellular component biogenesis	85	290	3309	17846	0.00012885	41	126	3309	17846	0.00308799	47	171	3309	17846	0.0244646
GO:0010880	regulation of release of sequestered calcium ion into cytosol by sarcoplasmic reticulum	6	290	28	17846	0.000130171	4	126	28	17846	0.00145458	2	171	28	17846	0.135076
GO:0032970	regulation of actin filament-based process	20	290	383	17846	0.000130886	10	126	383	17846	0.00730819	10	171	383	17846	0.032751
GO:0051649	establishment of localization in cell	64	290	2258	17846	0.000131488	34	126	2258	17846	0.000503917	34	171	2258	17846	0.0376669
GO:0071396	cellular response to lipid	26	290	596	17846	0.000135315	12	126	596	17846	0.016044	14	171	596	17846	0.0189249
GO:0060401	cytosolic calcium ion transport	13	290	173	17846	0.000135418	7	126	173	17846	0.00491892	6	171	173	17846	0.047142
GO:0006810	transport	121	290	5263	17846	0.000135418	56	126	5263	17846	0.0051967	69	171	5263	17846	0.0162936
GO:0070588	calcium ion transmembrane transport	18	290	320	17846	0.000138254	10	126	320	17846	0.00255896	8	171	320	17846	0.0743329
GO:0033993	response to lipid	34	290	910	17846	0.00013828	17	126	910	17846	0.00488346	18	171	910	17846	0.0267873
GO:0002520	immune system development	35	290	957	17846	0.0001577	16	126	957	17846	0.0170165	21	171	957	17846	0.00558538
GO:0030099	myeloid cell differentiation	20	290	389	17846	0.0001577	8	126	389	17846	0.052045	12	171	389	17846	0.00619093
GO:0045934	negative regulation of nucleobase-containing compound metabolic process	46	290	1434	17846	0.000164974	21	126	1434	17846	0.016044	27	171	1434	17846	0.00802607
GO:0035556	intracellular signal transduction	75	290	2826	17846	0.000171683	35	126	2826	17846	0.00802414	43	171	2826	17846	0.0131523
GO:1903508	positive regulation of nucleic acid-templated transcription	50	290	1618	17846	0.000171683	20	126	1618	17846	0.0678732	31	171	1618	17846	0.00304949
GO:0009891	positive regulation of biosynthetic process	58	290	1994	17846	0.000177331	26	126	1994	17846	0.0195125	34	171	1994	17846	0.00855635
GO:0010647	positive regulation of cell communication	54	290	1807	17846	0.000181071	22	126	1807	17846	0.0599309	33	171	1807	17846	0.00398504
GO:0080090	regulation of primary metabolic process	134	290	6040	17846	0.000182345	54	126	6040	17846	0.112234	86	171	6040	17846	0.000263796
GO:0072359	circulatory system development	37	290	1049	17846	0.000182345	20	126	1049	17846	0.00151912	18	171	1049	17846	0.0734448
GO:0045893	positive regulation of transcription, DNA-templated	48	290	1532	17846	0.000182791	18	126	1532	17846	0.114349	31	171	1532	17846	0.00139799
GO:0045893	positive regulation of transcription, DNA-templated	48	290	1532	17846	0.000182791	18	126	1532	17846	0.114349	31	171	1532	17846	0.00139799
GO:0045893	positive regulation of transcription, DNA-templated	48	290	1532	17846	0.000182791	18	126	1532	17846	0.114349	54	171	3490	17846	0.00264973
GO:0045893	positive regulation of transcription, DNA-templated	48	290	1532	17846	0.000182791	18	126	1532	17846	0.114349	54	171	3670	17846	0.00695743
GO:0045893	positive regulation of transcription, DNA-templated	48	290	1532	17846	0.000182791	18	126	1532	17846	0.114349	24	171	1201	17846	0.00742951
GO:0045893	positive regulation of transcription, DNA-templated	48	290	1532	17846	0.000182791	16	126	1201	17846	0.0719175	31	171	1532	17846	0.00139799
GO:0045893	positive regulation of transcription, DNA-templated	48	290	1532	17846	0.000182791	16	126	1201	17846	0.0719175	31	171	1532	17846	0.00139799
GO:0045893	positive regulation of transcription, DNA-templated	48	290	1532	17846	0.000182791	16	126	1201	17846	0.0719175	54	171	3490	17846	0.00264973
GO:0045893	positive regulation of transcription, DNA-templated	48	290	1532	17846	0.000182791	16	126	1201	17846	0.0719175	54	171	3670	17846	0.00695743
GO:0045893	positive regulation of transcription, DNA-templated	48	290	1532	17846	0.000182791	16	126	1201	17846	0.0719175	24	171	1201	17846	0.00742951
GO:0045893	positive regulation of transcription, DNA-templated	48	290	1532	17846	0.000182791	18	126	1532	17846	0.114349	31	171	1532	17846	0.00139799
GO:0045893	positive regulation of transcription, DNA-templated	48	290	1532	17846	0.000182791	18	126	1532	17846	0.114349	31	171	1532	17846	0.00139799
GO:0045893	positive regulation of transcription, DNA-templated	48	290	1532	17846	0.000182791	18	126	1532	17846	0.114349	54	171	3490	17846	0.00264973
GO:0045893	positive regulation of transcription, DNA-templated	48	290	1532	17846	0.000182791	18	126	1532	17846	0.114349	54	171	3670	17846	0.00695743
GO:0045893	positive regulation of transcription, DNA-templated	48	290	1532	17846	0.000182791	18	126	1532	17846	0.114349	24	171	1201	17846	0.00742951
GO:0045893	positive regulation of transcription, DNA-templated	48	290	1532	17846	0.000182791	31	126	3490	17846	0.252676	31	171	1532	17846	0.00139799
GO:0045893	positive regulation of transcription, DNA-templated	48	290	1532	17846	0.000182791	31	126	3490	17846	0.252676	31	171	1532	17846	0.00139799
GO:0045893	positive regulation of transcription, DNA-templated	48	290	1532	17846	0.000182791	31	126	3490	17846	0.252676	54	171	3490	17846	0.00264973
GO:0045893	positive regulation of transcription, DNA-templated	48	290	1532	17846	0.000182791	31	126	3490	17846	0.252676	54	171	3670	17846	0.00695743
GO:0045893	positive regulation of transcription, DNA-templated	48	290	1532	17846	0.000182791	31	126	3490	17846	0.252676	24	171	1201	17846	0.00742951
GO:0045893	positive regulation of transcription, DNA-templated	48	290	1532	17846	0.000182791	32	126	3670	17846	0.266367	31	171	1532	17846	0.00139799
GO:0045893	positive regulation of transcription, DNA-templated	48	290	1532	17846	0.000182791	32	126	3670	17846	0.266367	31	171	1532	17846	0.00139799
GO:0045893	positive regulation of transcription, DNA-templated	48	290	1532	17846	0.000182791	32	126	3670	17846	0.266367	54	171	3490	17846	0.00264973
GO:0045893	positive regulation of transcription, DNA-templated	48	290	1532	17846	0.000182791	32	126	3670	17846	0.266367	54	171	3670	17846	0.00695743
GO:0045893	positive regulation of transcription, DNA-templated	48	290	1532	17846	0.000182791	32	126	3670	17846	0.266367	24	171	1201	17846	0.00742951
GO:0014070	response to organic cyclic compound	35	290	966	17846	0.000183245	16	126	966	17846	0.0181659	20	171	966	17846	0.0121862
GO:0019222	regulation of metabolic process	145	290	6688	17846	0.00019136	60	126	6688	17846	0.0804374	91	171	6688	17846	0.000614162
GO:0023056	positive regulation of signaling	54	290	1814	17846	0.000196212	22	126	1814	17846	0.0610974	33	171	1814	17846	0.00415472
GO:0006816	calcium ion transport	21	290	431	17846	0.000197574	12	126	431	17846	0.00174066	9	171	431	17846	0.117551
GO:1902531	regulation of intracellular signal transduction	54	290	1816	17846	0.000200476	24	126	1816	17846	0.0223446	33	171	1816	17846	0.00419544
GO:0031323	regulation of cellular metabolic process	137	290	6230	17846	0.000204971	56	126	6230	17846	0.0943531	87	171	6230	17846	0.000444488
GO:1900449	regulation of glutamate receptor signaling pathway	8	290	64	17846	0.000207148	5	126	64	17846	0.00253051	4	171	64	17846	0.0296135
GO:0060402	calcium ion transport into cytosol	12	290	155	17846	0.000207148	6	126	155	17846	0.0128928	6	171	155	17846	0.0327283
GO:0061024	membrane organization	33	290	893	17846	0.000218242	15	126	893	17846	0.0208461	20	171	893	17846	0.00595678
GO:0008104	protein localization	74	290	2806	17846	0.000234485	30	126	2806	17846	0.0767507	47	171	2806	17846	0.00150819
GO:0042592	homeostatic process	55	290	1875	17846	0.00023454	27	126	1875	17846	0.00504577	29	171	1875	17846	0.0468083
GO:0044057	regulation of system process	25	290	582	17846	0.000234835	14	126	582	17846	0.00198765	12	171	582	17846	0.0666658
GO:0010557	positive regulation of macromolecule biosynthetic process	55	290	1877	17846	0.000239524	24	126	1877	17846	0.0303762	33	171	1877	17846	0.00662821
GO:0106027	neuron projection organization	9	290	86	17846	0.000243246	3	126	86	17846	0.117814	6	171	86	17846	0.00352634
GO:0014808	release of sequestered calcium ion into cytosol by sarcoplasmic reticulum	6	290	32	17846	0.000250183	4	126	32	17846	0.00223638	2	171	32	17846	0.158262
GO:0034765	regulation of ion transmembrane transport	22	290	475	17846	0.000250954	13	126	475	17846	0.00111509	10	171	475	17846	0.0907947
GO:0008038	neuron recognition	7	290	48	17846	0.000258501	4	126	48	17846	0.0069854	3	171	48	17846	0.0694185
GO:0048167	regulation of synaptic plasticity	13	290	187	17846	0.000269468	8	126	187	17846	0.00174066	6	171	187	17846	0.0617508
GO:0061061	muscle structure development	26	290	629	17846	0.000294423	14	126	629	17846	0.00369696	13	171	629	17846	0.0535536
GO:1903514	release of sequestered calcium ion into cytosol by endoplasmic reticulum	6	290	33	17846	0.000294453	4	126	33	17846	0.0024123	2	171	33	17846	0.16261
GO:0051129	negative regulation of cellular component organization	28	290	707	17846	0.000295094	12	126	707	17846	0.0397996	17	171	707	17846	0.0071371
GO:0009888	tissue development	58	290	2037	17846	0.000295919	27	126	2037	17846	0.0137456	33	171	2037	17846	0.0181169
GO:0016032	viral process	31	290	831	17846	0.000322041	10	126	831	17846	0.229656	22	171	831	17846	0.00052405
GO:0097553	calcium ion transmembrane import into cytosol	11	290	137	17846	0.000322041	6	126	137	17846	0.00776124	5	171	137	17846	0.0662634
GO:0098609	cell-cell adhesion	31	290	833	17846	0.00033467	11	126	833	17846	0.15297	20	171	833	17846	0.00306487
GO:0019219	regulation of nucleobase-containing compound metabolic process	97	290	4051	17846	0.00034553	37	126	4051	17846	0.190387	64	171	4051	17846	0.000346057
GO:0071363	cellular response to growth factor stimulus	27	290	675	17846	0.00034553	12	126	675	17846	0.0312934	16	171	675	17846	0.0104342
GO:0034097	response to cytokine	39	290	1174	17846	0.000349802	13	126	1174	17846	0.232218	27	171	1174	17846	0.000617703
GO:0040007	growth	34	290	962	17846	0.000365379	17	126	962	17846	0.0077966	19	171	962	17846	0.0218637
GO:0009987	cellular process	280	290	16056	17846	0.000385589	124	126	16056	17846	0.0042123	163	171	16056	17846	0.0576682
GO:0042127	regulation of cell population proliferation	48	290	1587	17846	0.000397519	19	126	1587	17846	0.0919274	31	171	1587	17846	0.0023162
GO:0033036	macromolecule localization	80	290	3169	17846	0.000413228	33	126	3169	17846	0.0767507	50	171	3169	17846	0.00306546
GO:0000122	negative regulation of transcription by RNA polymerase II	31	290	845	17846	0.000425528	13	126	845	17846	0.054099	20	171	845	17846	0.00352634
GO:0048813	dendrite morphogenesis	11	290	142	17846	0.00043121	3	126	142	17846	0.240198	8	171	142	17846	0.00168548
GO:0048589	developmental growth	26	290	647	17846	0.000444519	13	126	647	17846	0.0109292	14	171	647	17846	0.0327283
GO:0050768	negative regulation of neurogenesis	16	290	289	17846	0.000445115	9	126	289	17846	0.00473475	7	171	289	17846	0.110628
GO:0071417	cellular response to organonitrogen compound	26	290	648	17846	0.00045237	11	126	648	17846	0.0508977	15	171	648	17846	0.0160033
GO:2000310	regulation of NMDA receptor activity	6	290	36	17846	0.000457824	5	126	36	17846	0.00027036	2	171	36	17846	0.178978
GO:0009890	negative regulation of biosynthetic process	47	290	1554	17846	0.000475759	21	126	1554	17846	0.0301061	28	171	1554	17846	0.0108965
GO:0060998	regulation of dendritic spine development	8	290	73	17846	0.000477309	2	126	73	17846	0.250764	6	171	73	17846	0.00174529
GO:0009967	positive regulation of signal transduction	49	290	1649	17846	0.000487892	18	126	1649	17846	0.173485	32	171	1649	17846	0.00203529
GO:0035235	ionotropic glutamate receptor signaling pathway	8	290	74	17846	0.000523164	5	126	74	17846	0.0042123	4	171	74	17846	0.0429365
GO:0030097	hemopoiesis	31	290	857	17846	0.000533607	12	126	857	17846	0.100936	20	171	857	17846	0.00400399
GO:0090257	regulation of muscle system process	14	290	232	17846	0.000548942	8	126	232	17846	0.00506972	6	171	232	17846	0.121269
GO:0016358	dendrite development	14	290	233	17846	0.0005732	4	126	233	17846	0.242569	10	171	233	17846	0.0020251
GO:0051253	negative regulation of RNA metabolic process	42	290	1340	17846	0.000587929	19	126	1340	17846	0.0296124	25	171	1340	17846	0.0124681
GO:0097104	postsynaptic membrane assembly	4	290	12	17846	0.000594558	3	126	12	17846	0.0022276	1	171	12	17846	0.283763
GO:1903169	regulation of calcium ion transmembrane transport	11	290	148	17846	0.000596943	7	126	148	17846	0.00250071	4	171	148	17846	0.198019
GO:1903507	negative regulation of nucleic acid-templated transcription	40	290	1252	17846	0.000598983	18	126	1252	17846	0.0317478	24	171	1252	17846	0.0113004
GO:0050775	positive regulation of dendrite morphogenesis	6	290	38	17846	0.000599866	1	126	38	17846	0.364256	5	171	38	17846	0.000869231
GO:0099565	chemical synaptic transmission, postsynaptic	12	290	176	17846	0.000609654	9	126	176	17846	0.000243886	4	171	176	17846	0.266712
GO:0099565	chemical synaptic transmission, postsynaptic	12	290	176	17846	0.000609654	9	126	176	17846	0.000243886	4	171	176	17846	0.266712
GO:0099565	chemical synaptic transmission, postsynaptic	12	290	176	17846	0.000609654	9	126	176	17846	0.000243886	4	171	176	17846	0.266712
GO:0099565	chemical synaptic transmission, postsynaptic	12	290	176	17846	0.000609654	9	126	176	17846	0.000243886	4	171	176	17846	0.266712
GO:0044087	regulation of cellular component biogenesis	33	290	949	17846	0.000609958	14	126	949	17846	0.0561688	20	171	949	17846	0.0103671
GO:1902679	negative regulation of RNA biosynthetic process	40	290	1254	17846	0.000609958	18	126	1254	17846	0.0320424	24	171	1254	17846	0.0114748
GO:0045596	negative regulation of cell differentiation	27	290	702	17846	0.000609958	13	126	702	17846	0.0194062	15	171	702	17846	0.0285107
GO:0050773	regulation of dendrite development	11	290	149	17846	0.000614966	2	126	149	17846	0.39688	9	171	149	17846	0.000485777
GO:0010648	negative regulation of cell communication	42	290	1345	17846	0.000614966	21	126	1345	17846	0.00820632	24	171	1345	17846	0.0224603
GO:1901699	cellular response to nitrogen compound	27	290	703	17846	0.000617539	11	126	703	17846	0.0750418	16	171	703	17846	0.0141469
GO:0002521	leukocyte differentiation	22	290	510	17846	0.000618672	9	126	510	17846	0.0719175	14	171	510	17846	0.00653663
GO:0010522	regulation of calcium ion transport into cytosol	9	290	99	17846	0.000624132	5	126	99	17846	0.0112233	4	171	99	17846	0.086296
GO:0070848	response to growth factor	27	290	704	17846	0.000625271	12	126	704	17846	0.0395187	16	171	704	17846	0.0142314
GO:0023057	negative regulation of signaling	42	290	1349	17846	0.000645597	21	126	1349	17846	0.00840895	24	171	1349	17846	0.0230798
GO:0007010	cytoskeleton organization	42	290	1353	17846	0.000688517	21	126	1353	17846	0.0086097	23	171	1353	17846	0.0403351
GO:0097061	dendritic spine organization	8	290	78	17846	0.000705652	2	126	78	17846	0.262098	6	171	78	17846	0.00233446
GO:0030902	hindbrain development	11	290	152	17846	0.000715609	5	126	152	17846	0.0406711	7	171	152	17846	0.00930072
GO:0010770	positive regulation of cell morphogenesis involved in differentiation	11	290	153	17846	0.000756521	2	126	153	17846	0.405412	9	171	153	17846	0.000570992
GO:0016055	Wnt signaling pathway	22	290	518	17846	0.000756521	13	126	518	17846	0.00232566	10	171	518	17846	0.131805
GO:0098815	modulation of excitatory postsynaptic potential	6	290	40	17846	0.000757929	4	126	40	17846	0.0042123	2	171	40	17846	0.201196
GO:0035295	tube development	34	290	1006	17846	0.000767762	19	126	1006	17846	0.00238249	16	171	1006	17846	0.145062
GO:0034613	cellular protein localization	54	290	1925	17846	0.000771802	23	126	1925	17846	0.0610071	33	171	1925	17846	0.00923851
GO:0198738	cell-cell signaling by wnt	22	290	520	17846	0.000788861	13	126	520	17846	0.00238249	10	171	520	17846	0.133509
GO:0044403	symbiotic process	31	290	881	17846	0.000802493	10	126	881	17846	0.250764	22	171	881	17846	0.00107052
GO:0040012	regulation of locomotion	33	290	967	17846	0.000818151	15	126	967	17846	0.0344092	20	171	967	17846	0.0122742
GO:0050770	regulation of axonogenesis	12	290	183	17846	0.00081891	5	126	183	17846	0.0685638	7	171	183	17846	0.0196853
GO:0051961	negative regulation of nervous system development	16	290	308	17846	0.000822555	9	126	308	17846	0.00667537	7	171	308	17846	0.135076
GO:0070727	cellular macromolecule localization	54	290	1936	17846	0.000879957	23	126	1936	17846	0.0639958	33	171	1936	17846	0.00983538
GO:0048585	negative regulation of response to stimulus	47	290	1603	17846	0.00088539	23	126	1603	17846	0.0125991	26	171	1603	17846	0.0422815
GO:0009790	embryo development	34	290	1015	17846	0.00088539	13	126	1015	17846	0.130789	22	171	1015	17846	0.00505242
GO:0001764	neuron migration	11	290	157	17846	0.00091238	3	126	157	17846	0.256617	8	171	157	17846	0.00295536
GO:0055082	cellular chemical homeostasis	29	290	805	17846	0.000915755	14	126	805	17846	0.0211793	16	171	805	17846	0.0373784
GO:0032958	inositol phosphate biosynthetic process	6	290	42	17846	0.000959471	1	126	42	17846	0.380078	5	171	42	17846	0.00132474
GO:0051252	regulation of RNA metabolic process	90	290	3797	17846	0.000984985	35	126	3797	17846	0.192671	59	171	3797	17846	0.00117863
GO:2000145	regulation of cell motility	31	290	894	17846	0.00101115	15	126	894	17846	0.0208461	18	171	894	17846	0.0229243
GO:0071407	cellular response to organic cyclic compound	24	290	608	17846	0.00101358	11	126	608	17846	0.0375466	13	171	608	17846	0.0435612
GO:0014819		4	290	14	17846	0.00101358	NA	NA	NA	NA	NA	14	17846	7.55884e-06	0.000310427	DMD/GSTO1/KCNJ2/SLC8A3
GO:0045892	negative regulation of transcription, DNA-templated	38	290	1201	17846	0.00103032	16	126	1201	17846	0.0719175	24	171	1201	17846	0.00742951
GO:0045892	negative regulation of transcription, DNA-templated	38	290	1201	17846	0.00103032	16	126	1201	17846	0.0719175	31	171	1532	17846	0.00139799
GO:0045892	negative regulation of transcription, DNA-templated	38	290	1201	17846	0.00103032	16	126	1201	17846	0.0719175	54	171	3490	17846	0.00264973
GO:0045892	negative regulation of transcription, DNA-templated	38	290	1201	17846	0.00103032	16	126	1201	17846	0.0719175	54	171	3670	17846	0.00695743
GO:0045892	negative regulation of transcription, DNA-templated	38	290	1201	17846	0.00103032	16	126	1201	17846	0.0719175	24	171	1201	17846	0.00742951
GO:0045892	negative regulation of transcription, DNA-templated	38	290	1201	17846	0.00103032	16	126	1201	17846	0.0719175	24	171	1201	17846	0.00742951
GO:0045892	negative regulation of transcription, DNA-templated	38	290	1201	17846	0.00103032	16	126	1201	17846	0.0719175	31	171	1532	17846	0.00139799
GO:0045892	negative regulation of transcription, DNA-templated	38	290	1201	17846	0.00103032	16	126	1201	17846	0.0719175	54	171	3490	17846	0.00264973
GO:0045892	negative regulation of transcription, DNA-templated	38	290	1201	17846	0.00103032	16	126	1201	17846	0.0719175	54	171	3670	17846	0.00695743
GO:0045892	negative regulation of transcription, DNA-templated	38	290	1201	17846	0.00103032	16	126	1201	17846	0.0719175	24	171	1201	17846	0.00742951
GO:0045892	negative regulation of transcription, DNA-templated	38	290	1201	17846	0.00103032	18	126	1532	17846	0.114349	24	171	1201	17846	0.00742951
GO:0045892	negative regulation of transcription, DNA-templated	38	290	1201	17846	0.00103032	18	126	1532	17846	0.114349	31	171	1532	17846	0.00139799
GO:0045892	negative regulation of transcription, DNA-templated	38	290	1201	17846	0.00103032	18	126	1532	17846	0.114349	54	171	3490	17846	0.00264973
GO:0045892	negative regulation of transcription, DNA-templated	38	290	1201	17846	0.00103032	18	126	1532	17846	0.114349	54	171	3670	17846	0.00695743
GO:0045892	negative regulation of transcription, DNA-templated	38	290	1201	17846	0.00103032	18	126	1532	17846	0.114349	24	171	1201	17846	0.00742951
GO:0045892	negative regulation of transcription, DNA-templated	38	290	1201	17846	0.00103032	31	126	3490	17846	0.252676	24	171	1201	17846	0.00742951
GO:0045892	negative regulation of transcription, DNA-templated	38	290	1201	17846	0.00103032	31	126	3490	17846	0.252676	31	171	1532	17846	0.00139799
GO:0045892	negative regulation of transcription, DNA-templated	38	290	1201	17846	0.00103032	31	126	3490	17846	0.252676	54	171	3490	17846	0.00264973
GO:0045892	negative regulation of transcription, DNA-templated	38	290	1201	17846	0.00103032	31	126	3490	17846	0.252676	54	171	3670	17846	0.00695743
GO:0045892	negative regulation of transcription, DNA-templated	38	290	1201	17846	0.00103032	31	126	3490	17846	0.252676	24	171	1201	17846	0.00742951
GO:0045892	negative regulation of transcription, DNA-templated	38	290	1201	17846	0.00103032	32	126	3670	17846	0.266367	24	171	1201	17846	0.00742951
GO:0045892	negative regulation of transcription, DNA-templated	38	290	1201	17846	0.00103032	32	126	3670	17846	0.266367	31	171	1532	17846	0.00139799
GO:0045892	negative regulation of transcription, DNA-templated	38	290	1201	17846	0.00103032	32	126	3670	17846	0.266367	54	171	3490	17846	0.00264973
GO:0045892	negative regulation of transcription, DNA-templated	38	290	1201	17846	0.00103032	32	126	3670	17846	0.266367	54	171	3670	17846	0.00695743
GO:0045892	negative regulation of transcription, DNA-templated	38	290	1201	17846	0.00103032	32	126	3670	17846	0.266367	24	171	1201	17846	0.00742951
GO:0006937	regulation of muscle contraction	11	290	160	17846	0.0010524	5	126	160	17846	0.046799	6	171	160	17846	0.0361457
GO:0050731	positive regulation of peptidyl-tyrosine phosphorylation	12	290	189	17846	0.00106318	4	126	189	17846	0.18217	10	171	189	17846	0.000501909
GO:0061001	regulation of dendritic spine morphogenesis	6	290	43	17846	0.00106833	1	126	43	17846	0.382403	5	171	43	17846	0.00143668
GO:0010558	negative regulation of macromolecule biosynthetic process	44	290	1478	17846	0.00106997	20	126	1478	17846	0.0354696	26	171	1478	17846	0.0189249
GO:0009725	response to hormone	33	290	984	17846	0.00107086	14	126	984	17846	0.0684145	20	171	984	17846	0.0141469
GO:0042692	muscle cell differentiation	17	290	351	17846	0.00107086	8	126	351	17846	0.0350793	10	171	351	17846	0.0207734
GO:0048668	collateral sprouting	5	290	27	17846	0.00107086	2	126	27	17846	0.0911235	3	171	27	17846	0.0210617
GO:0010562	positive regulation of phosphorus metabolic process	36	290	1116	17846	0.00107086	12	126	1116	17846	0.252676	28	171	1116	17846	0.000140014
GO:0045937	positive regulation of phosphate metabolic process	36	290	1116	17846	0.00107086	12	126	1116	17846	0.252676	28	171	1116	17846	0.000140014
GO:0035418	protein localization to synapse	8	290	84	17846	0.00107086	3	126	84	17846	0.11296	5	171	84	17846	0.0146193
GO:0060048	cardiac muscle contraction	10	290	134	17846	0.00109997	5	126	134	17846	0.0290636	5	171	134	17846	0.0621622
GO:0019220	regulation of phosphate metabolic process	50	290	1765	17846	0.0011022	17	126	1765	17846	0.27233	37	171	1765	17846	0.000175946
GO:0009889	regulation of biosynthetic process	99	290	4305	17846	0.00110772	40	126	4305	17846	0.143485	63	171	4305	17846	0.00279807
GO:0031327	negative regulation of cellular biosynthetic process	45	290	1530	17846	0.00112243	20	126	1530	17846	0.0444061	27	171	1530	17846	0.0156933
GO:0051174	regulation of phosphorus metabolic process	50	290	1767	17846	0.00112243	17	126	1767	17846	0.273266	37	171	1767	17846	0.000176237
GO:2000463	positive regulation of excitatory postsynaptic potential	5	290	28	17846	0.00125673	3	126	28	17846	0.0153182	2	171	28	17846	0.135076
GO:0048646	anatomical structure formation involved in morphogenesis	35	290	1083	17846	0.00127977	19	126	1083	17846	0.00469678	17	171	1083	17846	0.141252
GO:0065009	regulation of molecular function	83	290	3458	17846	0.0013123	39	126	3458	17846	0.0180131	50	171	3458	17846	0.0140552
GO:0030048	actin filament-based movement	10	290	138	17846	0.00137053	6	126	138	17846	0.00794299	4	171	138	17846	0.17325
GO:0006464	cellular protein modification process	96	290	4169	17846	0.00141336	37	126	4169	17846	0.231023	64	171	4169	17846	0.000729236
GO:0036211	protein modification process	96	290	4169	17846	0.00141336	37	126	4169	17846	0.231023	64	171	4169	17846	0.000729236
GO:0031326	regulation of cellular biosynthetic process	97	290	4226	17846	0.00143743	40	126	4226	17846	0.12046	61	171	4226	17846	0.00471627
GO:0018193	peptidyl-amino acid modification	39	290	1271	17846	0.0014539	16	126	1271	17846	0.0967227	25	171	1271	17846	0.00718232
GO:0014075	response to amine	6	290	46	17846	0.0014651	1	126	46	17846	0.393043	5	171	46	17846	0.0018452
GO:0030334	regulation of cell migration	29	290	834	17846	0.00152813	13	126	834	17846	0.0503826	18	171	834	17846	0.0133356
GO:0019725	cellular homeostasis	32	290	963	17846	0.00153682	17	126	963	17846	0.00784879	16	171	963	17846	0.115153
GO:0055119	relaxation of cardiac muscle	4	290	16	17846	0.00162963	3	126	16	17846	0.0042123	1	171	16	17846	0.312554
GO:0048814	regulation of dendrite morphogenesis	8	290	90	17846	0.00164678	1	126	90	17846	0.540696	7	171	90	17846	0.000761123
GO:0043085	positive regulation of catalytic activity	42	290	1419	17846	0.00166986	16	126	1419	17846	0.173485	29	171	1419	17846	0.00190265
GO:0003012	muscle system process	19	290	440	17846	0.00171542	11	126	440	17846	0.00578267	8	171	440	17846	0.213733
GO:0006941	striated muscle contraction	11	290	171	17846	0.00172494	5	126	171	17846	0.0576186	6	171	171	17846	0.0452137
GO:0086001	cardiac muscle cell action potential	7	290	68	17846	0.00173989	3	126	68	17846	0.0801401	4	171	68	17846	0.0341852
GO:0070252	actin-mediated cell contraction	9	290	116	17846	0.00174587	5	126	116	17846	0.0194062	4	171	116	17846	0.123763
GO:0006942	regulation of striated muscle contraction	8	290	91	17846	0.00174587	4	126	91	17846	0.0381123	4	171	91	17846	0.0714043
GO:0001501	skeletal system development	21	290	517	17846	0.00174678	9	126	517	17846	0.0752291	12	171	517	17846	0.0345956
GO:0044419	interspecies interaction between organisms	31	290	928	17846	0.00174678	10	126	928	17846	0.276287	22	171	928	17846	0.00190265
GO:0007507	heart development	22	290	557	17846	0.00179192	10	126	557	17846	0.0506687	12	171	557	17846	0.0530443
GO:0009968	negative regulation of signal transduction	38	290	1242	17846	0.00182123	18	126	1242	17846	0.0300434	22	171	1242	17846	0.0327283
GO:0010629	negative regulation of gene expression	51	290	1857	17846	0.00183793	21	126	1857	17846	0.106961	32	171	1857	17846	0.00994613
GO:0002573	myeloid leukocyte differentiation	12	290	203	17846	0.00183793	4	126	203	17846	0.20527	8	171	203	17846	0.0103303
GO:0010556	regulation of macromolecule biosynthetic process	94	290	4095	17846	0.00183793	38	126	4095	17846	0.161095	60	171	4095	17846	0.00385474
GO:2001141	regulation of RNA biosynthetic process	84	290	3553	17846	0.00183793	32	126	3553	17846	0.240198	56	171	3553	17846	0.00132474
GO:0050771	negative regulation of axonogenesis	7	290	69	17846	0.00183793	4	126	69	17846	0.0197331	3	171	69	17846	0.133771
GO:0086003	cardiac muscle cell contraction	7	290	69	17846	0.00183793	5	126	69	17846	0.00332657	2	171	69	17846	0.312554
GO:0042325	regulation of phosphorylation	45	290	1572	17846	0.001894	15	126	1572	17846	0.291402	34	171	1572	17846	0.000226608
GO:0007612	learning	10	290	145	17846	0.001894	5	126	145	17846	0.0359897	5	171	145	17846	0.0776497
GO:0043523	regulation of neuron apoptotic process	12	290	204	17846	0.001894	7	126	204	17846	0.0103429	6	171	204	17846	0.0816387
GO:0010941	regulation of cell death	47	290	1669	17846	0.00192744	19	126	1669	17846	0.124192	30	171	1669	17846	0.00824305
GO:0006996	organelle organization	90	290	3893	17846	0.0021012	46	126	3893	17846	0.00308799	48	171	3893	17846	0.142528
GO:0018130	heterocycle biosynthetic process	97	290	4279	17846	0.00213487	38	126	4279	17846	0.227716	63	171	4279	17846	0.00240925
GO:0031399	regulation of protein modification process	50	290	1822	17846	0.00213487	17	126	1822	17846	0.291402	37	171	1822	17846	0.000311272
GO:0043647	inositol phosphate metabolic process	7	290	71	17846	0.00214987	2	126	71	17846	0.248644	5	171	71	17846	0.00863973
GO:0021772	olfactory bulb development	5	290	32	17846	0.00216634	3	126	32	17846	0.0198735	3	171	32	17846	0.0308132
GO:0071229	cellular response to acid chemical	12	290	208	17846	0.002224	5	126	208	17846	0.0930612	7	171	208	17846	0.0329905
GO:0006468	protein phosphorylation	53	290	1973	17846	0.00222414	21	126	1973	17846	0.158781	36	171	1973	17846	0.00233446
GO:0043269	regulation of ion transport	25	290	690	17846	0.002269	14	126	690	17846	0.00708654	12	171	690	17846	0.149207
GO:0048738	cardiac muscle tissue development	12	290	209	17846	0.00230488	6	126	209	17846	0.0359897	6	171	209	17846	0.0875876
GO:0050848	regulation of calcium-mediated signaling	8	290	96	17846	0.00235005	4	126	96	17846	0.0422497	4	171	96	17846	0.0806426
GO:0060996	dendritic spine development	8	290	96	17846	0.00235005	2	126	96	17846	0.295692	6	171	96	17846	0.00540147
GO:1901576	organic substance biosynthetic process	130	290	6169	17846	0.00236085	50	126	6169	17846	0.283686	84	171	6169	17846	0.00150545
GO:0021988	olfactory lobe development	5	290	33	17846	0.00245953	3	126	33	17846	0.0209042	3	171	33	17846	0.0327283
GO:0010771	negative regulation of cell morphogenesis involved in differentiation	8	290	97	17846	0.00250328	4	126	97	17846	0.0427453	4	171	97	17846	0.0825858
GO:0051172	negative regulation of nitrogen compound metabolic process	60	290	2336	17846	0.00253219	29	126	2336	17846	0.0205753	33	171	2336	17846	0.0806426
GO:0001503	ossification	17	290	383	17846	0.00253219	6	126	383	17846	0.202539	11	171	383	17846	0.0140552
GO:0010959	regulation of metal ion transport	17	290	383	17846	0.00253219	9	126	383	17846	0.0208461	8	171	383	17846	0.142528
GO:0060537	muscle tissue development	17	290	383	17846	0.00253219	9	126	383	17846	0.0208461	8	171	383	17846	0.142528
GO:0043067	regulation of programmed cell death	44	290	1549	17846	0.00253219	19	126	1549	17846	0.0801401	27	171	1549	17846	0.0181169
GO:0031345	negative regulation of cell projection organization	11	290	181	17846	0.00253953	4	126	181	17846	0.168173	7	171	181	17846	0.0189249
GO:0010001	glial cell differentiation	12	290	212	17846	0.00254004	4	126	212	17846	0.224229	9	171	212	17846	0.00400376
GO:0071345	cellular response to cytokine stimulus	34	290	1087	17846	0.00256062	12	126	1087	17846	0.241711	23	171	1087	17846	0.00508221
GO:0006355	regulation of transcription, DNA-templated	82	290	3490	17846	0.00260633	31	126	3490	17846	0.252676	54	171	3490	17846	0.00264973
GO:0006355	regulation of transcription, DNA-templated	82	290	3490	17846	0.00260633	31	126	3490	17846	0.252676	31	171	1532	17846	0.00139799
GO:0006355	regulation of transcription, DNA-templated	82	290	3490	17846	0.00260633	31	126	3490	17846	0.252676	54	171	3490	17846	0.00264973
GO:0006355	regulation of transcription, DNA-templated	82	290	3490	17846	0.00260633	31	126	3490	17846	0.252676	54	171	3670	17846	0.00695743
GO:0006355	regulation of transcription, DNA-templated	82	290	3490	17846	0.00260633	31	126	3490	17846	0.252676	24	171	1201	17846	0.00742951
GO:0006355	regulation of transcription, DNA-templated	82	290	3490	17846	0.00260633	16	126	1201	17846	0.0719175	54	171	3490	17846	0.00264973
GO:0006355	regulation of transcription, DNA-templated	82	290	3490	17846	0.00260633	16	126	1201	17846	0.0719175	31	171	1532	17846	0.00139799
GO:0006355	regulation of transcription, DNA-templated	82	290	3490	17846	0.00260633	16	126	1201	17846	0.0719175	54	171	3490	17846	0.00264973
GO:0006355	regulation of transcription, DNA-templated	82	290	3490	17846	0.00260633	16	126	1201	17846	0.0719175	54	171	3670	17846	0.00695743
GO:0006355	regulation of transcription, DNA-templated	82	290	3490	17846	0.00260633	16	126	1201	17846	0.0719175	24	171	1201	17846	0.00742951
GO:0006355	regulation of transcription, DNA-templated	82	290	3490	17846	0.00260633	18	126	1532	17846	0.114349	54	171	3490	17846	0.00264973
GO:0006355	regulation of transcription, DNA-templated	82	290	3490	17846	0.00260633	18	126	1532	17846	0.114349	31	171	1532	17846	0.00139799
GO:0006355	regulation of transcription, DNA-templated	82	290	3490	17846	0.00260633	18	126	1532	17846	0.114349	54	171	3490	17846	0.00264973
GO:0006355	regulation of transcription, DNA-templated	82	290	3490	17846	0.00260633	18	126	1532	17846	0.114349	54	171	3670	17846	0.00695743
GO:0006355	regulation of transcription, DNA-templated	82	290	3490	17846	0.00260633	18	126	1532	17846	0.114349	24	171	1201	17846	0.00742951
GO:0006355	regulation of transcription, DNA-templated	82	290	3490	17846	0.00260633	31	126	3490	17846	0.252676	54	171	3490	17846	0.00264973
GO:0006355	regulation of transcription, DNA-templated	82	290	3490	17846	0.00260633	31	126	3490	17846	0.252676	31	171	1532	17846	0.00139799
GO:0006355	regulation of transcription, DNA-templated	82	290	3490	17846	0.00260633	31	126	3490	17846	0.252676	54	171	3490	17846	0.00264973
GO:0006355	regulation of transcription, DNA-templated	82	290	3490	17846	0.00260633	31	126	3490	17846	0.252676	54	171	3670	17846	0.00695743
GO:0006355	regulation of transcription, DNA-templated	82	290	3490	17846	0.00260633	31	126	3490	17846	0.252676	24	171	1201	17846	0.00742951
GO:0006355	regulation of transcription, DNA-templated	82	290	3490	17846	0.00260633	32	126	3670	17846	0.266367	54	171	3490	17846	0.00264973
GO:0006355	regulation of transcription, DNA-templated	82	290	3490	17846	0.00260633	32	126	3670	17846	0.266367	31	171	1532	17846	0.00139799
GO:0006355	regulation of transcription, DNA-templated	82	290	3490	17846	0.00260633	32	126	3670	17846	0.266367	54	171	3490	17846	0.00264973
GO:0006355	regulation of transcription, DNA-templated	82	290	3490	17846	0.00260633	32	126	3670	17846	0.266367	54	171	3670	17846	0.00695743
GO:0006355	regulation of transcription, DNA-templated	82	290	3490	17846	0.00260633	32	126	3670	17846	0.266367	24	171	1201	17846	0.00742951
GO:0002682	regulation of immune system process	46	290	1648	17846	0.00261433	19	126	1648	17846	0.115692	29	171	1648	17846	0.0121862
GO:1903506	regulation of nucleic acid-templated transcription	83	290	3548	17846	0.00269925	31	126	3548	17846	0.268104	55	171	3548	17846	0.00218123
GO:0045444	fat cell differentiation	12	290	214	17846	0.00273132	3	126	214	17846	0.331921	10	171	214	17846	0.00117863
GO:0003015	heart process	14	290	281	17846	0.00283905	6	126	281	17846	0.0897556	8	171	281	17846	0.0435108
GO:0051924	regulation of calcium ion transport	13	290	248	17846	0.00289644	8	126	248	17846	0.00722316	5	171	248	17846	0.266712
GO:0009058	biosynthetic process	131	290	6260	17846	0.00289825	50	126	6260	17846	0.308602	85	171	6260	17846	0.00145045
GO:0034654	nucleobase-containing compound biosynthetic process	95	290	4212	17846	0.00290805	38	126	4212	17846	0.201498	61	171	4212	17846	0.00432924
GO:0006873	cellular ion homeostasis	24	290	664	17846	0.00297173	12	126	664	17846	0.0290636	13	171	664	17846	0.0725488
GO:0051480	regulation of cytosolic calcium ion concentration	16	290	353	17846	0.00297173	10	126	353	17846	0.00459126	7	171	353	17846	0.197388
GO:0055117	regulation of cardiac muscle contraction	7	290	76	17846	0.00302985	4	126	76	17846	0.0243601	3	171	76	17846	0.155502
GO:0001932	regulation of protein phosphorylation	41	290	1424	17846	0.00310857	14	126	1424	17846	0.283304	31	171	1424	17846	0.000465829
GO:0060627	regulation of vesicle-mediated transport	21	290	545	17846	0.00311584	7	126	545	17846	0.250764	14	171	545	17846	0.0103943
GO:0050730	regulation of peptidyl-tyrosine phosphorylation	13	290	251	17846	0.0031836	5	126	251	17846	0.149883	10	171	251	17846	0.00322716
GO:1903829	positive regulation of cellular protein localization	15	290	320	17846	0.00320312	4	126	320	17846	0.330569	12	171	320	17846	0.00156763
GO:0030278	regulation of ossification	11	290	188	17846	0.00335397	4	126	188	17846	0.180926	7	171	188	17846	0.0222077
GO:0021537	telencephalon development	13	290	253	17846	0.00340155	5	126	253	17846	0.15297	9	171	253	17846	0.0102281
GO:0010605	negative regulation of macromolecule metabolic process	67	290	2728	17846	0.00340155	30	126	2728	17846	0.0599309	39	171	2728	17846	0.0435981
GO:0048670	regulation of collateral sprouting	4	290	20	17846	0.00341002	1	126	20	17846	0.28357	3	171	20	17846	0.0113003
GO:0061003	positive regulation of dendritic spine morphogenesis	4	290	20	17846	0.00341002	1	126	20	17846	0.28357	3	171	20	17846	0.0113003
GO:0007167	enzyme linked receptor protein signaling pathway	32	290	1018	17846	0.00344689	13	126	1018	17846	0.132444	20	171	1018	17846	0.0189249
GO:0032414	positive regulation of ion transmembrane transporter activity	8	290	103	17846	0.00347189	2	126	103	17846	0.311859	6	171	103	17846	0.00721676
GO:1901652	response to peptide	20	290	511	17846	0.00347189	5	126	511	17846	0.405412	15	171	511	17846	0.00270539
GO:0042981	regulation of apoptotic process	43	290	1529	17846	0.00347189	19	126	1529	17846	0.0741644	26	171	1529	17846	0.0271937
GO:0043113	receptor clustering	6	290	56	17846	0.00358284	2	126	56	17846	0.215471	4	171	56	17846	0.0201643
GO:0051279	regulation of release of sequestered calcium ion into cytosol	7	290	79	17846	0.00369878	5	126	79	17846	0.00505276	2	171	79	17846	0.338339
GO:0048588	developmental cell growth	12	290	223	17846	0.00374079	6	126	223	17846	0.0434494	6	171	223	17846	0.106857
GO:0048878	chemical homeostasis	35	290	1160	17846	0.00374633	17	126	1160	17846	0.0334418	19	171	1160	17846	0.0875876
GO:0002684	positive regulation of immune system process	36	290	1207	17846	0.00379754	15	126	1207	17846	0.117849	23	171	1207	17846	0.0142314
GO:0045665	negative regulation of neuron differentiation	12	290	224	17846	0.00386517	6	126	224	17846	0.0441752	6	171	224	17846	0.108364
GO:0060997	dendritic spine morphogenesis	6	290	57	17846	0.00388739	1	126	57	17846	0.430862	5	171	57	17846	0.00400399
GO:0099601	regulation of neurotransmitter receptor activity	7	290	80	17846	0.00393436	5	126	80	17846	0.00520272	3	171	80	17846	0.16778
GO:0019722	calcium-mediated signaling	12	290	225	17846	0.00398794	8	126	225	17846	0.00447917	4	171	225	17846	0.335812
GO:2000113	negative regulation of cellular macromolecule biosynthetic process	40	290	1398	17846	0.00398794	17	126	1398	17846	0.10352	25	171	1398	17846	0.0189249
GO:0009892	negative regulation of metabolic process	71	290	2964	17846	0.00426026	31	126	2964	17846	0.085084	42	171	2964	17846	0.0380861
GO:0014706	striated muscle tissue development	16	290	367	17846	0.0042685	8	126	367	17846	0.0410124	8	171	367	17846	0.123715
GO:1901362	organic cyclic compound biosynthetic process	98	290	4432	17846	0.0042685	39	126	4432	17846	0.231023	63	171	4432	17846	0.00518397
GO:0086004	regulation of cardiac muscle cell contraction	5	290	38	17846	0.00427064	4	126	38	17846	0.00369696	1	171	38	17846	0.433137
GO:0051897	positive regulation of protein kinase B signaling	10	290	164	17846	0.00430304	4	126	164	17846	0.135861	7	171	164	17846	0.0127306
GO:1903706	regulation of hemopoiesis	18	290	445	17846	0.00453254	9	126	445	17846	0.0399146	9	171	445	17846	0.131939
GO:0051347	positive regulation of transferase activity	23	290	646	17846	0.00455516	8	126	646	17846	0.246391	18	171	646	17846	0.00133697
GO:0043388	positive regulation of DNA binding	6	290	59	17846	0.00456214	3	126	59	17846	0.0629836	3	171	59	17846	0.0998059
GO:0010467	gene expression	115	290	5404	17846	0.00456214	46	126	5404	17846	0.240198	72	171	5404	17846	0.00927836
GO:0035239	tube morphogenesis	27	290	817	17846	0.00461094	18	126	817	17846	0.000700185	10	171	817	17846	0.397805
GO:0060541	respiratory system development	11	290	197	17846	0.00463142	6	126	197	17846	0.0300021	6	171	197	17846	0.0734448
GO:0032774	RNA biosynthetic process	85	290	3728	17846	0.00464769	33	126	3728	17846	0.248644	56	171	3728	17846	0.00372363
GO:0021801	cerebral cortex radial glia guided migration	4	290	22	17846	0.00464769	1	126	22	17846	0.291402	3	171	22	17846	0.0139125
GO:0022030	telencephalon glial cell migration	4	290	22	17846	0.00464769	1	126	22	17846	0.291402	3	171	22	17846	0.0139125
GO:0086012	membrane depolarization during cardiac muscle cell action potential	4	290	22	17846	0.00464769	2	126	22	17846	0.0719175	2	171	22	17846	0.0983735
GO:0009792	embryo development ending in birth or egg hatching	23	290	648	17846	0.00464769	8	126	648	17846	0.246619	15	171	648	17846	0.0160033
GO:1904646	cellular response to amyloid-beta	5	290	39	17846	0.00467554	1	126	39	17846	0.36841	4	171	39	17846	0.00777657
GO:0022402	cell cycle process	39	290	1365	17846	0.00467826	21	126	1365	17846	0.00947894	20	171	1365	17846	0.158262
GO:0018108	peptidyl-tyrosine phosphorylation	16	290	372	17846	0.0047414	6	126	372	17846	0.189481	12	171	372	17846	0.00458508
GO:0006796	phosphate-containing compound metabolic process	77	290	3300	17846	0.00476944	31	126	3300	17846	0.198086	50	171	3300	17846	0.00640096
GO:0061098	positive regulation of protein tyrosine kinase activity	6	290	60	17846	0.00484047	1	126	60	17846	0.443059	6	171	60	17846	0.00072391
GO:0030003	cellular cation homeostasis	23	290	651	17846	0.00488227	12	126	651	17846	0.0255175	12	171	651	17846	0.116594
GO:1902533	positive regulation of intracellular signal transduction	31	290	999	17846	0.00488645	12	126	999	17846	0.193302	20	171	999	17846	0.0159953
GO:0019438	aromatic compound biosynthetic process	95	290	4288	17846	0.00491052	38	126	4288	17846	0.227716	61	171	4288	17846	0.00639495
GO:0061008	hepaticobiliary system development	9	290	138	17846	0.00491402	2	126	138	17846	0.378548	7	171	138	17846	0.00605781
GO:0002237	response to molecule of bacterial origin	15	290	337	17846	0.00492424	8	126	337	17846	0.0296124	8	171	337	17846	0.0898773
GO:0016310	phosphorylation	60	290	2412	17846	0.00497339	23	126	2412	17846	0.240198	41	171	2412	17846	0.00306546
GO:0018212	peptidyl-tyrosine modification	16	290	375	17846	0.00505873	6	126	375	17846	0.193302	12	171	375	17846	0.00486351
GO:0051402	neuron apoptotic process	12	290	233	17846	0.00505873	7	126	233	17846	0.0188436	6	171	233	17846	0.12226
GO:0033674	positive regulation of kinase activity	21	290	571	17846	0.00505873	7	126	571	17846	0.266217	17	171	571	17846	0.00104603
GO:0001974	blood vessel remodeling	5	290	40	17846	0.00509314	4	126	40	17846	0.0042123	2	171	40	17846	0.201196
GO:0032411	positive regulation of transporter activity	8	290	111	17846	0.00515857	2	126	111	17846	0.328934	6	171	111	17846	0.00961227
GO:2000112	regulation of cellular macromolecule biosynthetic process	89	290	3965	17846	0.00517995	35	126	3965	17846	0.242569	57	171	3965	17846	0.00787832
GO:0060560	developmental growth involved in morphogenesis	12	290	234	17846	0.00518706	5	126	234	17846	0.124192	8	171	234	17846	0.0195139
GO:0048755	branching morphogenesis of a nerve	3	290	10	17846	0.00518706	2	126	10	17846	0.0248643	1	171	10	17846	0.266712
GO:0086016	AV node cell action potential	3	290	10	17846	0.00518706	2	126	10	17846	0.0248643	1	171	10	17846	0.266712
GO:0086027	AV node cell to bundle of His cell signaling	3	290	10	17846	0.00518706	2	126	10	17846	0.0248643	1	171	10	17846	0.266712
GO:0097105	presynaptic membrane assembly	3	290	10	17846	0.00518706	2	126	10	17846	0.0248643	1	171	10	17846	0.266712
GO:0007413	axonal fasciculation	4	290	23	17846	0.00521997	1	126	23	17846	0.296008	3	171	23	17846	0.0150337
GO:0106030	neuron projection fasciculation	4	290	23	17846	0.00521997	1	126	23	17846	0.296008	3	171	23	17846	0.0150337
GO:0030335	positive regulation of cell migration	19	290	493	17846	0.00521997	7	126	493	17846	0.217876	13	171	493	17846	0.0120654
GO:0006874	cellular calcium ion homeostasis	18	290	454	17846	0.00525192	12	126	454	17846	0.00255409	7	171	454	17846	0.318571
GO:1901653	cellular response to peptide	16	290	378	17846	0.00532389	4	126	378	17846	0.393043	12	171	378	17846	0.00510027
GO:0032956	regulation of actin cytoskeleton organization	15	290	341	17846	0.00533171	6	126	341	17846	0.153562	9	171	341	17846	0.0431664
GO:1901214	regulation of neuron death	14	290	306	17846	0.00553927	7	126	306	17846	0.0503826	8	171	306	17846	0.0621948
GO:0003013	circulatory system process	20	290	536	17846	0.00553995	8	126	536	17846	0.160203	12	171	536	17846	0.0429365
GO:0006357	regulation of transcription by RNA polymerase II	65	290	2687	17846	0.0055801	27	126	2687	17846	0.153996	41	171	2687	17846	0.0153927
GO:0098693	regulation of synaptic vesicle cycle	8	290	113	17846	0.00559655	5	126	113	17846	0.0179154	3	171	113	17846	0.27313
GO:0006875	cellular metal ion homeostasis	21	290	578	17846	0.00566424	12	126	578	17846	0.0128552	10	171	578	17846	0.193308
GO:0006793	phosphorus metabolic process	77	290	3327	17846	0.00570007	31	126	3327	17846	0.210022	50	171	3327	17846	0.00740466
GO:0031646	positive regulation of nervous system process	6	290	63	17846	0.0058678	3	126	63	17846	0.0708084	3	171	63	17846	0.114588
GO:0080134	regulation of response to stress	41	290	1484	17846	0.00597899	16	126	1484	17846	0.212084	26	171	1484	17846	0.0196481
GO:0097659	nucleic acid-templated transcription	84	290	3714	17846	0.00604104	32	126	3714	17846	0.278013	55	171	3714	17846	0.00540147
GO:0099054	presynapse assembly	5	290	42	17846	0.00604694	2	126	42	17846	0.157647	3	171	42	17846	0.0530443
GO:1903115	regulation of actin filament-based movement	5	290	42	17846	0.00604694	4	126	42	17846	0.00475603	1	171	42	17846	0.45404
GO:0071219	cellular response to molecule of bacterial origin	11	290	206	17846	0.00604694	5	126	206	17846	0.0911235	6	171	206	17846	0.0837387
GO:1901019	regulation of calcium ion transmembrane transporter activity	7	290	88	17846	0.00608954	4	126	88	17846	0.0351587	3	171	88	17846	0.193804
GO:0043524	negative regulation of neuron apoptotic process	9	290	144	17846	0.00619423	5	126	144	17846	0.0356631	5	171	144	17846	0.0762347
GO:0043412	macromolecule modification	96	290	4382	17846	0.00619939	37	126	4382	17846	0.278013	64	171	4382	17846	0.00260549
GO:1902903	regulation of supramolecular fiber organization	15	290	348	17846	0.00633855	7	126	348	17846	0.0787157	8	171	348	17846	0.100439
GO:0009266	response to temperature stimulus	12	290	241	17846	0.00634866	7	126	241	17846	0.02105	5	171	241	17846	0.257169
GO:0007517	muscle organ development	16	290	386	17846	0.00638697	8	126	386	17846	0.0506687	8	171	386	17846	0.146829
GO:0045321	leukocyte activation	37	290	1300	17846	0.00642201	15	126	1300	17846	0.1709	24	171	1300	17846	0.0160467
GO:0006351	transcription, DNA-templated	83	290	3670	17846	0.00646226	32	126	3670	17846	0.266367	54	171	3670	17846	0.00695743
GO:0006351	transcription, DNA-templated	83	290	3670	17846	0.00646226	32	126	3670	17846	0.266367	31	171	1532	17846	0.00139799
GO:0006351	transcription, DNA-templated	83	290	3670	17846	0.00646226	32	126	3670	17846	0.266367	54	171	3490	17846	0.00264973
GO:0006351	transcription, DNA-templated	83	290	3670	17846	0.00646226	32	126	3670	17846	0.266367	54	171	3670	17846	0.00695743
GO:0006351	transcription, DNA-templated	83	290	3670	17846	0.00646226	32	126	3670	17846	0.266367	24	171	1201	17846	0.00742951
GO:0006351	transcription, DNA-templated	83	290	3670	17846	0.00646226	16	126	1201	17846	0.0719175	54	171	3670	17846	0.00695743
GO:0006351	transcription, DNA-templated	83	290	3670	17846	0.00646226	16	126	1201	17846	0.0719175	31	171	1532	17846	0.00139799
GO:0006351	transcription, DNA-templated	83	290	3670	17846	0.00646226	16	126	1201	17846	0.0719175	54	171	3490	17846	0.00264973
GO:0006351	transcription, DNA-templated	83	290	3670	17846	0.00646226	16	126	1201	17846	0.0719175	54	171	3670	17846	0.00695743
GO:0006351	transcription, DNA-templated	83	290	3670	17846	0.00646226	16	126	1201	17846	0.0719175	24	171	1201	17846	0.00742951
GO:0006351	transcription, DNA-templated	83	290	3670	17846	0.00646226	18	126	1532	17846	0.114349	54	171	3670	17846	0.00695743
GO:0006351	transcription, DNA-templated	83	290	3670	17846	0.00646226	18	126	1532	17846	0.114349	31	171	1532	17846	0.00139799
GO:0006351	transcription, DNA-templated	83	290	3670	17846	0.00646226	18	126	1532	17846	0.114349	54	171	3490	17846	0.00264973
GO:0006351	transcription, DNA-templated	83	290	3670	17846	0.00646226	18	126	1532	17846	0.114349	54	171	3670	17846	0.00695743
GO:0006351	transcription, DNA-templated	83	290	3670	17846	0.00646226	18	126	1532	17846	0.114349	24	171	1201	17846	0.00742951
GO:0006351	transcription, DNA-templated	83	290	3670	17846	0.00646226	31	126	3490	17846	0.252676	54	171	3670	17846	0.00695743
GO:0006351	transcription, DNA-templated	83	290	3670	17846	0.00646226	31	126	3490	17846	0.252676	31	171	1532	17846	0.00139799
GO:0006351	transcription, DNA-templated	83	290	3670	17846	0.00646226	31	126	3490	17846	0.252676	54	171	3490	17846	0.00264973
GO:0006351	transcription, DNA-templated	83	290	3670	17846	0.00646226	31	126	3490	17846	0.252676	54	171	3670	17846	0.00695743
GO:0006351	transcription, DNA-templated	83	290	3670	17846	0.00646226	31	126	3490	17846	0.252676	24	171	1201	17846	0.00742951
GO:0006351	transcription, DNA-templated	83	290	3670	17846	0.00646226	32	126	3670	17846	0.266367	54	171	3670	17846	0.00695743
GO:0006351	transcription, DNA-templated	83	290	3670	17846	0.00646226	32	126	3670	17846	0.266367	31	171	1532	17846	0.00139799
GO:0006351	transcription, DNA-templated	83	290	3670	17846	0.00646226	32	126	3670	17846	0.266367	54	171	3490	17846	0.00264973
GO:0006351	transcription, DNA-templated	83	290	3670	17846	0.00646226	32	126	3670	17846	0.266367	54	171	3670	17846	0.00695743
GO:0006351	transcription, DNA-templated	83	290	3670	17846	0.00646226	32	126	3670	17846	0.266367	24	171	1201	17846	0.00742951
GO:0040017	positive regulation of locomotion	20	290	545	17846	0.00652933	7	126	545	17846	0.250764	14	171	545	17846	0.0103943
GO:0003009	skeletal muscle contraction	5	290	43	17846	0.0065737	1	126	43	17846	0.382403	4	171	43	17846	0.0101167
GO:0046113	nucleobase catabolic process	3	290	11	17846	0.0065737	2	126	11	17846	0.0290636	1	171	11	17846	0.275423
GO:1902065	response to L-glutamate	3	290	11	17846	0.0065737	1	126	11	17846	0.236073	2	171	11	17846	0.0376669
GO:0008285	negative regulation of cell population proliferation	23	290	671	17846	0.00661039	12	126	671	17846	0.0301061	12	171	671	17846	0.133144
GO:0030155	regulation of cell adhesion	23	290	671	17846	0.00661039	12	126	671	17846	0.0301061	13	171	671	17846	0.0762347
GO:0045670	regulation of osteoclast differentiation	6	290	65	17846	0.00663426	2	126	65	17846	0.240198	4	171	65	17846	0.0308132
GO:0007613	memory	8	290	117	17846	0.00667882	3	126	117	17846	0.193302	6	171	117	17846	0.0117225
GO:0007204	positive regulation of cytosolic calcium ion concentration	14	290	314	17846	0.00668519	8	126	314	17846	0.0216137	6	171	314	17846	0.256176
GO:0098655	cation transmembrane transport	30	290	980	17846	0.00668519	15	126	980	17846	0.0372286	16	171	980	17846	0.126485
GO:0010882	regulation of cardiac muscle contraction by calcium ion signaling	4	290	25	17846	0.00668519	2	126	25	17846	0.0835528	2	171	25	17846	0.118132
GO:0021952	central nervous system projection neuron axonogenesis	4	290	25	17846	0.00668519	1	126	25	17846	0.309095	3	171	25	17846	0.0181169
GO:0032925	regulation of activin receptor signaling pathway	4	290	25	17846	0.00668519	2	126	25	17846	0.0835528	3	171	25	17846	0.0181169
GO:0055074	calcium ion homeostasis	18	290	467	17846	0.00672349	12	126	467	17846	0.00312789	7	171	467	17846	0.329815
GO:0043009	chordate embryonic development	22	290	631	17846	0.00678368	8	126	631	17846	0.240198	14	171	631	17846	0.028245
GO:0006936	muscle contraction	15	290	352	17846	0.00681632	7	126	352	17846	0.080722	8	171	352	17846	0.105554
GO:0051099	positive regulation of binding	10	290	179	17846	0.00713847	6	126	179	17846	0.0214302	5	171	179	17846	0.135076
GO:0043065	positive regulation of apoptotic process	22	290	635	17846	0.00732338	14	126	635	17846	0.00397623	8	171	635	17846	0.401748
GO:0048010	vascular endothelial growth factor receptor signaling pathway	7	290	92	17846	0.00750621	4	126	92	17846	0.0390891	4	171	92	17846	0.0732576
GO:0030318	melanocyte differentiation	4	290	26	17846	0.00764948	3	126	26	17846	0.0126953	1	171	26	17846	0.369456
GO:0032957	inositol trisphosphate metabolic process	4	290	26	17846	0.00764948	1	126	26	17846	0.313857	3	171	26	17846	0.0195139
GO:0060314	regulation of ryanodine-sensitive calcium-release channel activity	4	290	26	17846	0.00764948	2	126	26	17846	0.0875856	2	171	26	17846	0.123763
GO:0014009	glial cell proliferation	5	290	45	17846	0.00778799	2	126	45	17846	0.169313	3	171	45	17846	0.0604905
GO:0016049	cell growth	18	290	474	17846	0.00780789	10	126	474	17846	0.0234936	9	171	474	17846	0.1623
GO:0006476	protein deacetylation	7	290	93	17846	0.00790145	2	126	93	17846	0.290964	5	171	93	17846	0.0201152
GO:2000147	positive regulation of cell motility	19	290	515	17846	0.00790145	7	126	515	17846	0.235967	13	171	515	17846	0.0156752
GO:0043068	positive regulation of programmed cell death	22	290	640	17846	0.00795917	14	126	640	17846	0.0042123	8	171	640	17846	0.407216
GO:0032268	regulation of cellular protein metabolic process	63	290	2628	17846	0.00797063	24	126	2628	17846	0.264272	43	171	2628	17846	0.00419544
GO:1903522	regulation of blood circulation	13	290	285	17846	0.00803111	6	126	285	17846	0.0921925	7	171	285	17846	0.104879
GO:0014074	response to purine-containing compound	9	290	151	17846	0.00803111	3	126	151	17846	0.250764	6	171	151	17846	0.0299454
GO:0051147	regulation of muscle cell differentiation	9	290	151	17846	0.00803111	5	126	151	17846	0.0400729	4	171	151	17846	0.204834
GO:0086067	AV node cell to bundle of His cell communication	3	290	12	17846	0.00811521	2	126	12	17846	0.0320647	1	171	12	17846	0.283763
GO:0097090	presynaptic membrane organization	3	290	12	17846	0.00811521	2	126	12	17846	0.0320647	1	171	12	17846	0.283763
GO:2001171	positive regulation of ATP biosynthetic process	3	290	12	17846	0.00811521	1	126	12	17846	0.240198	2	171	12	17846	0.0429365
GO:0003008	system process	55	290	2217	17846	0.00819394	30	126	2217	17846	0.00588443	27	171	2217	17846	0.289707
GO:0032496	response to lipopolysaccharide	14	290	323	17846	0.00831657	8	126	323	17846	0.024645	7	171	323	17846	0.155345
GO:0051896	regulation of protein kinase B signaling	11	290	217	17846	0.00840639	4	126	217	17846	0.227716	8	171	217	17846	0.0140552
GO:0030111	regulation of Wnt signaling pathway	15	290	361	17846	0.00840639	10	126	361	17846	0.00506972	6	171	361	17846	0.306613
GO:0051246	regulation of protein metabolic process	66	290	2795	17846	0.00849302	26	126	2795	17846	0.240198	44	171	2795	17846	0.00696105
GO:2001259	positive regulation of cation channel activity	6	290	69	17846	0.00849844	2	126	69	17846	0.245622	4	171	69	17846	0.0352627
GO:0010942	positive regulation of cell death	23	290	688	17846	0.00859036	14	126	688	17846	0.00695957	9	171	688	17846	0.367309
GO:0010977	negative regulation of neuron projection development	9	290	153	17846	0.00859327	4	126	153	17846	0.118692	5	171	153	17846	0.0893224
GO:0034767	positive regulation of ion transmembrane transport	9	290	153	17846	0.00859327	2	126	153	17846	0.405412	7	171	153	17846	0.00955169
GO:0046718	viral entry into host cell	8	290	123	17846	0.00859327	2	126	123	17846	0.349188	6	171	123	17846	0.014063
GO:0019058	viral life cycle	14	290	325	17846	0.00864535	4	126	325	17846	0.334925	10	171	325	17846	0.0140552
GO:0048638	regulation of developmental growth	14	290	325	17846	0.00864535	6	126	325	17846	0.132703	8	171	325	17846	0.0789645
GO:0033554	cellular response to stress	51	290	2022	17846	0.00882732	20	126	2022	17846	0.236073	32	171	2022	17846	0.0271937
GO:0033043	regulation of organelle organization	36	290	1284	17846	0.00899555	17	126	1284	17846	0.0643022	19	171	1284	17846	0.1617
GO:0055085	transmembrane transport	44	290	1673	17846	0.00899717	21	126	1673	17846	0.0532753	24	171	1673	17846	0.135992
GO:0008347	glial cell migration	5	290	47	17846	0.00900156	1	126	47	17846	0.39688	4	171	47	17846	0.0129074
GO:0002027	regulation of heart rate	7	290	96	17846	0.00904053	4	126	96	17846	0.0422497	3	171	96	17846	0.221321
GO:0060070	canonical Wnt signaling pathway	14	290	328	17846	0.00932734	7	126	328	17846	0.0641641	8	171	328	17846	0.0816387
GO:0051101	regulation of DNA binding	8	290	125	17846	0.00937183	4	126	125	17846	0.0787157	4	171	125	17846	0.145062
GO:0032270	positive regulation of cellular protein metabolic process	42	290	1579	17846	0.00942524	15	126	1579	17846	0.2936	31	171	1579	17846	0.00213684
GO:0051057	positive regulation of small GTPase mediated signal transduction	6	290	71	17846	0.00958262	3	126	71	17846	0.086168	4	171	71	17846	0.0379779
GO:0044271	cellular nitrogen compound biosynthetic process	104	290	4906	17846	0.00958262	41	126	4906	17846	0.276287	67	171	4906	17846	0.00845287
GO:0007528	neuromuscular junction development	5	290	48	17846	0.00970667	3	126	48	17846	0.0421693	2	171	48	17846	0.245747
GO:0060324	face development	5	290	48	17846	0.00970667	3	126	48	17846	0.0421693	2	171	48	17846	0.245747
GO:0007049	cell cycle	47	290	1831	17846	0.00970667	25	126	1831	17846	0.0143818	24	171	1831	17846	0.233185
GO:0098771	inorganic ion homeostasis	24	290	740	17846	0.00970667	12	126	740	17846	0.0506687	13	171	740	17846	0.125558
GO:0048863	stem cell differentiation	12	290	257	17846	0.00970667	5	126	257	17846	0.158074	7	171	257	17846	0.0742425
GO:0051704	multi-organism process	70	290	3028	17846	0.00974244	30	126	3028	17846	0.140679	43	171	3028	17846	0.034247
GO:0065003	protein-containing complex assembly	48	290	1882	17846	0.00974244	24	126	1882	17846	0.0312934	26	171	1882	17846	0.153406
GO:0050872	white fat cell differentiation	3	290	13	17846	0.0097681	1	126	13	17846	0.246391	3	171	13	17846	0.00419544
GO:0061577	calcium ion transmembrane transport via high voltage-gated calcium channel	3	290	13	17846	0.0097681	2	126	13	17846	0.0359897	1	171	13	17846	0.290612
GO:0098703		3	290	13	17846	0.0097681	NA	NA	NA	NA	NA	13	17846	0.000230373	0.00419544	CACNA2D1/FYN/SLC8A3
GO:0030316	osteoclast differentiation	7	290	98	17846	0.00988881	2	126	98	17846	0.298474	5	171	98	17846	0.0242097
GO:0032870	cellular response to hormone stimulus	23	290	699	17846	0.0100413	9	126	699	17846	0.215471	14	171	699	17846	0.0529037
GO:0001508	action potential	8	290	127	17846	0.0100628	4	126	127	17846	0.0809019	4	171	127	17846	0.149207
GO:0045860	positive regulation of protein kinase activity	19	290	530	17846	0.0101009	7	126	530	17846	0.240435	15	171	530	17846	0.00362673
GO:0051272	positive regulation of cellular component movement	19	290	530	17846	0.0101009	7	126	530	17846	0.240435	13	171	530	17846	0.0189249
GO:0072503	cellular divalent inorganic cation homeostasis	18	290	490	17846	0.0103144	12	126	490	17846	0.00424316	7	171	490	17846	0.350696
GO:0051591	response to cAMP	7	290	99	17846	0.0103328	2	126	99	17846	0.302701	5	171	99	17846	0.0250496
GO:1903530	regulation of secretion by cell	24	290	745	17846	0.0103328	12	126	745	17846	0.0523472	12	171	745	17846	0.199711
GO:0098900	regulation of action potential	5	290	49	17846	0.0103328	2	126	49	17846	0.185917	3	171	49	17846	0.071864
GO:0099172	presynapse organization	5	290	49	17846	0.0103328	2	126	49	17846	0.185917	3	171	49	17846	0.071864
GO:1904645	response to amyloid-beta	5	290	49	17846	0.0103328	1	126	49	17846	0.405412	4	171	49	17846	0.0142314
GO:0044249	cellular biosynthetic process	124	290	6078	17846	0.0103428	50	126	6078	17846	0.262902	78	171	6078	17846	0.0132476
GO:0021799	cerebral cortex radially oriented cell migration	4	290	29	17846	0.0103994	1	126	29	17846	0.328934	3	171	29	17846	0.025032
GO:0090075	relaxation of muscle	4	290	29	17846	0.0103994	3	126	29	17846	0.0164375	1	171	29	17846	0.389162
GO:0040008	regulation of growth	22	290	659	17846	0.0104122	10	126	659	17846	0.100986	13	171	659	17846	0.0699377
GO:1900006	positive regulation of dendrite development	6	290	73	17846	0.0105189	1	126	73	17846	0.486972	5	171	73	17846	0.0094182
GO:0019538	protein metabolic process	119	290	5794	17846	0.0108254	47	126	5794	17846	0.291402	77	171	5794	17846	0.00621686
GO:0031032	actomyosin structure organization	10	290	193	17846	0.0110636	5	126	193	17846	0.0788065	5	171	193	17846	0.16002
GO:0006366	transcription by RNA polymerase II	66	290	2834	17846	0.0111562	28	126	2834	17846	0.163155	41	171	2834	17846	0.0327094
GO:0051050	positive regulation of transport	29	290	976	17846	0.0111888	5	126	976	17846	0.842163	24	171	976	17846	0.000643505
GO:0043170	macromolecule metabolic process	178	290	9366	17846	0.0112298	73	126	9366	17846	0.278834	112	171	9366	17846	0.00599541
GO:0060548	negative regulation of cell death	29	290	977	17846	0.0113107	9	126	977	17846	0.377276	22	171	977	17846	0.00338949
GO:2001237	negative regulation of extrinsic apoptotic signaling pathway	7	290	101	17846	0.0113107	3	126	101	17846	0.155146	5	171	101	17846	0.026916
GO:0034220	ion transmembrane transport	36	290	1307	17846	0.011321	18	126	1307	17846	0.0422497	19	171	1307	17846	0.176361
GO:0031401	positive regulation of protein modification process	34	290	1212	17846	0.0114007	12	126	1212	17846	0.296008	26	171	1212	17846	0.00210415
GO:0001775	cell activation	39	290	1454	17846	0.0115156	17	126	1454	17846	0.129997	24	171	1454	17846	0.0452137
GO:0086019	cell-cell signaling involved in cardiac conduction	4	290	30	17846	0.0115385	2	126	30	17846	0.102572	2	171	30	17846	0.147086
GO:0099068	postsynapse assembly	4	290	30	17846	0.0115385	3	126	30	17846	0.0176402	1	171	30	17846	0.394095
GO:0048729	tissue morphogenesis	22	290	666	17846	0.0115982	11	126	666	17846	0.0589567	12	171	666	17846	0.129113
GO:1902656		3	290	14	17846	0.0115996	NA	NA	NA	NA	NA	14	17846	0.00029114	0.00508221	CACNA2D1/FYN/SLC8A3
GO:0030001	metal ion transport	28	290	934	17846	0.0116493	13	126	934	17846	0.0896769	15	171	934	17846	0.152171
GO:0016192	vesicle-mediated transport	53	290	2160	17846	0.0117015	24	126	2160	17846	0.0921925	31	171	2160	17846	0.0806426
GO:0007422	peripheral nervous system development	6	290	75	17846	0.0117098	3	126	75	17846	0.0930612	3	171	75	17846	0.152525
GO:0021536	diencephalon development	6	290	75	17846	0.0117098	3	126	75	17846	0.0930612	4	171	75	17846	0.0435807
GO:0031324	negative regulation of cellular metabolic process	60	290	2526	17846	0.011831	28	126	2526	17846	0.0666866	34	171	2526	17846	0.118726
GO:0043069	negative regulation of programmed cell death	27	290	890	17846	0.0118428	9	126	890	17846	0.324769	20	171	890	17846	0.00573
GO:0071216	cellular response to biotic stimulus	11	290	230	17846	0.0118484	5	126	230	17846	0.120516	6	171	230	17846	0.118108
GO:0070997	neuron death	14	290	341	17846	0.0121958	7	126	341	17846	0.0728778	8	171	341	17846	0.0939975
GO:0051046	regulation of secretion	25	290	802	17846	0.0121958	13	126	802	17846	0.0402357	13	171	802	17846	0.175911
GO:0000278	mitotic cell cycle	29	290	984	17846	0.0121958	15	126	984	17846	0.0383392	16	171	984	17846	0.129867
GO:0035601	protein deacylation	7	290	103	17846	0.0122624	2	126	103	17846	0.311859	5	171	103	17846	0.0285107
GO:0140352	export from cell	41	290	1560	17846	0.0123002	17	126	1560	17846	0.187865	25	171	1560	17846	0.0529037
GO:0001101	response to acid chemical	14	290	342	17846	0.0124231	5	126	342	17846	0.251925	9	171	342	17846	0.043542
GO:0044260	cellular macromolecule metabolic process	161	290	8336	17846	0.0125219	65	126	8336	17846	0.302701	102	171	8336	17846	0.0068556
GO:0007009	plasma membrane organization	7	290	104	17846	0.0128285	3	126	104	17846	0.162399	4	171	104	17846	0.0960785
GO:0051963	regulation of synapse assembly	7	290	104	17846	0.0128285	3	126	104	17846	0.162399	4	171	104	17846	0.0960785
GO:0098732	macromolecule deacylation	7	290	104	17846	0.0128285	2	126	104	17846	0.313857	5	171	104	17846	0.0293118
GO:0050801	ion homeostasis	25	290	806	17846	0.0128627	12	126	806	17846	0.0779797	14	171	806	17846	0.116927
GO:0016575	histone deacetylation	6	290	77	17846	0.0130603	1	126	77	17846	0.500868	5	171	77	17846	0.0112295
GO:0050657	nucleic acid transport	10	290	199	17846	0.0130808	4	126	199	17846	0.198921	7	171	199	17846	0.0283655
GO:0050658	RNA transport	10	290	199	17846	0.0130808	4	126	199	17846	0.198921	7	171	199	17846	0.0283655
GO:0008284	positive regulation of cell population proliferation	27	290	898	17846	0.0130808	11	126	898	17846	0.199397	18	171	898	17846	0.0238223
GO:0032940	secretion by cell	40	290	1518	17846	0.0131785	17	126	1518	17846	0.1656	24	171	1518	17846	0.0658349
GO:0046483	heterocycle metabolic process	120	290	5892	17846	0.0132683	48	126	5892	17846	0.28357	76	171	5892	17846	0.0138336
GO:0034764	positive regulation of transmembrane transport	10	290	200	17846	0.0134618	2	126	200	17846	0.494586	8	171	200	17846	0.00961227
GO:0001889	liver development	8	290	135	17846	0.0134618	2	126	135	17846	0.373165	6	171	135	17846	0.0195895
GO:1902850	microtubule cytoskeleton organization involved in mitosis	8	290	135	17846	0.0134618	5	126	135	17846	0.0296124	4	171	135	17846	0.166309
GO:0060047	heart contraction	12	290	271	17846	0.0135233	5	126	271	17846	0.177932	7	171	271	17846	0.0880279
GO:0050806	positive regulation of synaptic transmission	9	290	167	17846	0.0135233	6	126	167	17846	0.0175673	3	171	167	17846	0.367367
GO:0002467		3	290	15	17846	0.0135233	3	126	15	17846	0.00371443	NA	NA	NA	NA	NA
GO:0010092	specification of animal organ identity	3	290	15	17846	0.0135233	2	126	15	17846	0.042426	2	171	15	17846	0.0588899
GO:1901841	regulation of high voltage-gated calcium channel activity	3	290	15	17846	0.0135233	2	126	15	17846	0.042426	1	171	15	17846	0.306613
GO:0061448	connective tissue development	12	290	272	17846	0.0138373	4	126	272	17846	0.278834	8	171	272	17846	0.0378673
GO:0051291	protein heterooligomerization	7	290	106	17846	0.0138373	4	126	106	17846	0.0541039	3	171	106	17846	0.255563
GO:0030260	entry into host cell	8	290	136	17846	0.0138373	2	126	136	17846	0.375577	6	171	136	17846	0.0200643
GO:0034605	cellular response to heat	8	290	136	17846	0.0138373	5	126	136	17846	0.0300549	3	171	136	17846	0.312554
GO:0044409	entry into host	8	290	136	17846	0.0138373	2	126	136	17846	0.375577	6	171	136	17846	0.0200643
GO:0046683	response to organophosphorus	8	290	136	17846	0.0138373	2	126	136	17846	0.375577	6	171	136	17846	0.0200643
GO:0001505	regulation of neurotransmitter levels	14	290	348	17846	0.0139509	10	126	348	17846	0.00422911	4	171	348	17846	0.517479
GO:0051236	establishment of RNA localization	10	290	202	17846	0.0141415	4	126	202	17846	0.203788	7	171	202	17846	0.0299454
GO:0071560	cellular response to transforming growth factor beta stimulus	11	290	237	17846	0.0141475	7	126	237	17846	0.019893	4	171	237	17846	0.35294
GO:0072507	divalent inorganic cation homeostasis	18	290	510	17846	0.0142341	12	126	510	17846	0.00534378	7	171	510	17846	0.369456
GO:0070509	calcium ion import	6	290	79	17846	0.0142448	3	126	79	17846	0.100986	3	171	79	17846	0.163995
GO:1900034	regulation of cellular response to heat	6	290	79	17846	0.0142448	3	126	79	17846	0.100986	3	171	79	17846	0.163995
GO:0002376	immune system process	72	290	3196	17846	0.0142448	28	126	3196	17846	0.278292	47	171	3196	17846	0.0142314
GO:0048639	positive regulation of developmental growth	9	290	169	17846	0.0143051	4	126	169	17846	0.146413	5	171	169	17846	0.117819
GO:0044267	cellular protein metabolic process	108	290	5215	17846	0.0144982	43	126	5215	17846	0.284141	70	171	5215	17846	0.00930206
GO:0042327	positive regulation of phosphorylation	30	290	1047	17846	0.0145597	9	126	1047	17846	0.425703	24	171	1047	17846	0.00156763
GO:0048568	embryonic organ development	16	290	430	17846	0.0147394	6	126	430	17846	0.245155	11	171	430	17846	0.0272903
GO:1901215	negative regulation of neuron death	10	290	204	17846	0.014948	5	126	204	17846	0.0900918	6	171	204	17846	0.0816387
GO:0055080	cation homeostasis	23	290	729	17846	0.0149901	12	126	729	17846	0.0463061	12	171	729	17846	0.184175
GO:0046173	polyol biosynthetic process	6	290	80	17846	0.0150098	1	126	80	17846	0.510707	5	171	80	17846	0.0126902
GO:0055023	positive regulation of cardiac muscle tissue growth	4	290	33	17846	0.0150428	2	126	33	17846	0.116466	2	171	33	17846	0.16261
GO:0071320	cellular response to cAMP	5	290	55	17846	0.0151977	1	126	55	17846	0.425809	4	171	55	17846	0.0195139
GO:0071398	cellular response to fatty acid	5	290	55	17846	0.0151977	2	126	55	17846	0.210022	3	171	55	17846	0.0880279
GO:0086065	cell communication involved in cardiac conduction	5	290	55	17846	0.0151977	3	126	55	17846	0.0549543	2	171	55	17846	0.275423
GO:0008016	regulation of heart contraction	11	290	240	17846	0.0151977	5	126	240	17846	0.132703	6	171	240	17846	0.133148
GO:0051247	positive regulation of protein metabolic process	43	290	1685	17846	0.0152518	16	126	1685	17846	0.288393	31	171	1685	17846	0.00510027
GO:0009059	macromolecule biosynthetic process	105	290	5057	17846	0.0156764	42	126	5057	17846	0.278013	67	171	5057	17846	0.0153927
GO:0071871		3	290	16	17846	0.0156764	3	126	16	17846	0.0042123	NA	NA	NA	NA	NA
GO:0048732	gland development	16	290	434	17846	0.0158533	5	126	434	17846	0.332367	12	171	434	17846	0.0124513
GO:0043491	protein kinase B signaling	11	290	242	17846	0.0160816	4	126	242	17846	0.250764	8	171	242	17846	0.0229243
GO:0050879	multicellular organismal movement	5	290	56	17846	0.0162333	1	126	56	17846	0.427443	4	171	56	17846	0.0201643
GO:0050881	musculoskeletal movement	5	290	56	17846	0.0162333	1	126	56	17846	0.427443	4	171	56	17846	0.0201643
GO:0097120		5	290	56	17846	0.0162333	NA	NA	NA	NA	NA	56	17846	0.000196029	0.00380799	ARHGAP44/GPHN/KIF5C/NETO1/RELN
GO:0050790	regulation of catalytic activity	55	290	2308	17846	0.0162333	22	126	2308	17846	0.246391	37	171	2308	17846	0.0126902
GO:0061387	regulation of extent of cell growth	7	290	110	17846	0.0162333	2	126	110	17846	0.327588	5	171	110	17846	0.0342488
GO:0043933	protein-containing complex subunit organization	53	290	2204	17846	0.0162333	27	126	2204	17846	0.0300549	28	171	2204	17846	0.236402
GO:0006811	ion transport	44	290	1743	17846	0.0163032	22	126	1743	17846	0.043654	23	171	1743	17846	0.235981
GO:0071559	response to transforming growth factor beta	11	290	243	17846	0.0163889	7	126	243	17846	0.0214302	4	171	243	17846	0.360532
GO:1904064	positive regulation of cation transmembrane transport	8	290	141	17846	0.0164264	2	126	141	17846	0.382403	6	171	141	17846	0.0230798
GO:0055001	muscle cell development	9	290	174	17846	0.0167089	5	126	174	17846	0.0601204	4	171	174	17846	0.265403
GO:0072358	cardiovascular system development	22	290	694	17846	0.0170223	14	126	694	17846	0.00730819	9	171	694	17846	0.370534
GO:0061337	cardiac conduction	8	290	142	17846	0.0170837	4	126	142	17846	0.100986	4	171	142	17846	0.18321
GO:0043066	negative regulation of apoptotic process	26	290	875	17846	0.0171054	9	126	875	17846	0.313745	19	171	875	17846	0.0100686
GO:0009408	response to heat	9	290	175	17846	0.0172574	5	126	175	17846	0.0610974	4	171	175	17846	0.266712
GO:0007389	pattern specification process	16	290	439	17846	0.0173123	8	126	439	17846	0.0815076	9	171	439	17846	0.125007
GO:0055065	metal ion homeostasis	21	290	652	17846	0.0175199	12	126	652	17846	0.0257114	10	171	652	17846	0.275423
GO:0006139	nucleobase-containing compound metabolic process	116	290	5715	17846	0.0175799	47	126	5715	17846	0.27534	73	171	5715	17846	0.0207734
GO:0009612	response to mechanical stimulus	10	290	210	17846	0.0175799	3	126	210	17846	0.328934	7	171	210	17846	0.0343042
GO:0044089	positive regulation of cellular component biogenesis	18	290	524	17846	0.0178315	6	126	524	17846	0.313857	12	171	524	17846	0.037641
GO:0021955	central nervous system neuron axonogenesis	4	290	35	17846	0.0178315	1	126	35	17846	0.35187	3	171	35	17846	0.0364073
GO:0071354	cellular response to interleukin-6	4	290	35	17846	0.0178315	1	126	35	17846	0.35187	3	171	35	17846	0.0364073
GO:1901385	regulation of voltage-gated calcium channel activity	4	290	35	17846	0.0178315	2	126	35	17846	0.124192	2	171	35	17846	0.17325
GO:0046903	secretion	42	290	1653	17846	0.0178954	18	126	1653	17846	0.174306	25	171	1653	17846	0.0847484
GO:0042693	muscle cell fate commitment	3	290	17	17846	0.0180259	2	126	17	17846	0.0511399	2	171	17	17846	0.0708364
GO:0070542	response to fatty acid	6	290	84	17846	0.0181639	2	126	84	17846	0.274895	4	171	84	17846	0.0584166
GO:0008015	blood circulation	18	290	526	17846	0.0184123	7	126	526	17846	0.240198	11	171	526	17846	0.0762347
GO:0055007	cardiac muscle cell differentiation	7	290	114	17846	0.0191857	3	126	114	17846	0.185917	4	171	114	17846	0.119363
GO:0014068	positive regulation of phosphatidylinositol 3-kinase signaling	6	290	85	17846	0.0191905	1	126	85	17846	0.52588	5	171	85	17846	0.015185
GO:0050931	pigment cell differentiation	4	290	36	17846	0.0195253	3	126	36	17846	0.0244727	1	171	36	17846	0.42305
GO:0086010	membrane depolarization during action potential	4	290	36	17846	0.0195253	2	126	36	17846	0.129081	2	171	36	17846	0.178978
GO:2000725	regulation of cardiac muscle cell differentiation	4	290	36	17846	0.0195253	2	126	36	17846	0.129081	2	171	36	17846	0.178978
GO:0009991	response to extracellular stimulus	18	290	530	17846	0.0197703	5	126	530	17846	0.425329	13	171	530	17846	0.0189249
GO:0002761	regulation of myeloid leukocyte differentiation	7	290	115	17846	0.0199613	3	126	115	17846	0.188025	4	171	115	17846	0.121497
GO:0051149	positive regulation of muscle cell differentiation	6	290	86	17846	0.020162	3	126	86	17846	0.117814	3	171	86	17846	0.186859
GO:0048762	mesenchymal cell differentiation	10	290	215	17846	0.0202818	4	126	215	17846	0.227716	7	171	215	17846	0.0376669
GO:0006812	cation transport	33	290	1221	17846	0.020391	17	126	1221	17846	0.0462335	17	171	1221	17846	0.245755
GO:1903827	regulation of cellular protein localization	18	290	532	17846	0.020391	5	126	532	17846	0.425809	14	171	532	17846	0.00893815
GO:0019932	second-messenger-mediated signaling	16	290	448	17846	0.020391	10	126	448	17846	0.0184645	6	171	448	17846	0.39942
GO:0009617	response to bacterium	22	290	707	17846	0.020391	12	126	707	17846	0.0397996	11	171	707	17846	0.247444
GO:0046649	lymphocyte activation	23	290	753	17846	0.0207199	11	126	753	17846	0.099038	14	171	753	17846	0.0806426
GO:0060348	bone development	10	290	216	17846	0.0207425	6	126	216	17846	0.0399146	4	171	216	17846	0.322497
GO:0035994		3	290	18	17846	0.0207425	NA	NA	NA	NA	NA	18	17846	0.000634523	0.00907433	DMD/NFKBIA/TTN
GO:2001169	regulation of ATP biosynthetic process	3	290	18	17846	0.0207425	1	126	18	17846	0.274895	2	171	18	17846	0.0762347
GO:0071704	organic substance metabolic process	200	290	10898	17846	0.0210435	82	126	10898	17846	0.338181	125	171	10898	17846	0.0088387
GO:0014037	Schwann cell differentiation	4	290	37	17846	0.0210822	2	126	37	17846	0.132703	2	171	37	17846	0.184519
GO:0060421	positive regulation of heart growth	4	290	37	17846	0.0210822	2	126	37	17846	0.132703	2	171	37	17846	0.184519
GO:2000249	regulation of actin cytoskeleton reorganization	4	290	37	17846	0.0210822	3	126	37	17846	0.0257114	1	171	37	17846	0.428275
GO:1904018	positive regulation of vasculature development	9	290	182	17846	0.021265	6	126	182	17846	0.0223447	3	171	182	17846	0.396156
GO:0051493	regulation of cytoskeleton organization	18	290	535	17846	0.021265	7	126	535	17846	0.245622	11	171	535	17846	0.0826393
GO:0001558	regulation of cell growth	15	290	410	17846	0.0214442	8	126	410	17846	0.064156	8	171	410	17846	0.17325
GO:0003170	heart valve development	5	290	61	17846	0.0219548	3	126	61	17846	0.0663063	2	171	61	17846	0.290612
GO:0048598	embryonic morphogenesis	19	290	580	17846	0.0219548	11	126	580	17846	0.0296124	9	171	580	17846	0.283763
GO:0110020	regulation of actomyosin structure organization	6	290	88	17846	0.0219667	3	126	88	17846	0.12184	3	171	88	17846	0.193804
GO:0008360	regulation of cell shape	8	290	150	17846	0.0224332	4	126	150	17846	0.113488	4	171	150	17846	0.201602
GO:0097435	supramolecular fiber organization	21	290	670	17846	0.0226705	10	126	670	17846	0.108267	12	171	670	17846	0.13219
GO:0051640	organelle localization	20	290	626	17846	0.0227477	12	126	626	17846	0.0208461	12	171	626	17846	0.095188
GO:0086091	regulation of heart rate by cardiac conduction	4	290	38	17846	0.0229119	2	126	38	17846	0.137389	2	171	38	17846	0.191244
GO:0051345	positive regulation of hydrolase activity	23	290	761	17846	0.0229552	8	126	761	17846	0.316489	16	171	761	17846	0.0254793
GO:0009880	embryonic pattern specification	5	290	62	17846	0.023284	2	126	62	17846	0.232218	4	171	62	17846	0.0272903
GO:0080135	regulation of cellular response to stress	22	290	717	17846	0.0233578	8	126	717	17846	0.287308	15	171	717	17846	0.0327283
GO:2000251	positive regulation of actin cytoskeleton reorganization	3	290	19	17846	0.0236406	2	126	19	17846	0.0599309	1	171	19	17846	0.33296
GO:2000727	positive regulation of cardiac muscle cell differentiation	3	290	19	17846	0.0236406	2	126	19	17846	0.0599309	1	171	19	17846	0.33296
GO:0050900	leukocyte migration	17	290	499	17846	0.0237259	5	126	499	17846	0.393043	12	171	499	17846	0.0287609
GO:0001934	positive regulation of protein phosphorylation	28	290	996	17846	0.0237259	9	126	996	17846	0.389324	22	171	996	17846	0.00409484
GO:0070661	leukocyte proliferation	12	290	296	17846	0.0237758	6	126	296	17846	0.101878	8	171	296	17846	0.0543422
GO:0051017	actin filament bundle assembly	8	290	152	17846	0.023885	5	126	152	17846	0.0406711	3	171	152	17846	0.344141
GO:0019637	organophosphate metabolic process	29	290	1046	17846	0.0244308	11	126	1046	17846	0.276287	18	171	1046	17846	0.0721831
GO:0070741	response to interleukin-6	4	290	39	17846	0.0247573	1	126	39	17846	0.36841	3	171	39	17846	0.0452137
GO:1901021	positive regulation of calcium ion transmembrane transporter activity	4	290	39	17846	0.0247573	2	126	39	17846	0.142256	2	171	39	17846	0.196853
GO:0051209	release of sequestered calcium ion into cytosol	7	290	121	17846	0.0250424	5	126	121	17846	0.0213744	2	171	121	17846	0.446221
GO:0043549	regulation of kinase activity	25	290	860	17846	0.0251253	8	126	860	17846	0.382403	21	171	860	17846	0.00187121
GO:0032103	positive regulation of response to external stimulus	20	290	633	17846	0.025144	8	126	633	17846	0.240198	13	171	633	17846	0.0554795
GO:0090087	regulation of peptide transport	22	290	725	17846	0.0261225	7	126	725	17846	0.376486	15	171	725	17846	0.0346078
GO:0046579	positive regulation of Ras protein signal transduction	5	290	64	17846	0.0261305	3	126	64	17846	0.0719175	3	171	64	17846	0.117819
GO:0035249	synaptic transmission, glutamatergic	6	290	92	17846	0.0264175	5	126	92	17846	0.00850709	1	171	92	17846	0.644717
GO:0035249	synaptic transmission, glutamatergic	6	290	92	17846	0.0264175	5	126	92	17846	0.00850709	1	171	32	17846	0.401748
GO:0035249	synaptic transmission, glutamatergic	6	290	92	17846	0.0264175	5	126	92	17846	0.00850709	1	171	69	17846	0.561943
GO:0035249	synaptic transmission, glutamatergic	6	290	92	17846	0.0264175	5	126	92	17846	0.00850709	1	171	92	17846	0.644717
GO:0035249	synaptic transmission, glutamatergic	6	290	92	17846	0.0264175	5	126	92	17846	0.00850709	1	171	92	17846	0.644717
GO:0035249	synaptic transmission, glutamatergic	6	290	92	17846	0.0264175	5	126	92	17846	0.00850709	1	171	32	17846	0.401748
GO:0035249	synaptic transmission, glutamatergic	6	290	92	17846	0.0264175	5	126	92	17846	0.00850709	1	171	69	17846	0.561943
GO:0035249	synaptic transmission, glutamatergic	6	290	92	17846	0.0264175	5	126	92	17846	0.00850709	1	171	92	17846	0.644717
GO:0035249	synaptic transmission, glutamatergic	6	290	92	17846	0.0264175	4	126	69	17846	0.0197331	1	171	92	17846	0.644717
GO:0035249	synaptic transmission, glutamatergic	6	290	92	17846	0.0264175	4	126	69	17846	0.0197331	1	171	32	17846	0.401748
GO:0035249	synaptic transmission, glutamatergic	6	290	92	17846	0.0264175	4	126	69	17846	0.0197331	1	171	69	17846	0.561943
GO:0035249	synaptic transmission, glutamatergic	6	290	92	17846	0.0264175	4	126	69	17846	0.0197331	1	171	92	17846	0.644717
GO:0035249	synaptic transmission, glutamatergic	6	290	92	17846	0.0264175	1	126	32	17846	0.338181	1	171	92	17846	0.644717
GO:0035249	synaptic transmission, glutamatergic	6	290	92	17846	0.0264175	1	126	32	17846	0.338181	1	171	32	17846	0.401748
GO:0035249	synaptic transmission, glutamatergic	6	290	92	17846	0.0264175	1	126	32	17846	0.338181	1	171	69	17846	0.561943
GO:0035249	synaptic transmission, glutamatergic	6	290	92	17846	0.0264175	1	126	32	17846	0.338181	1	171	92	17846	0.644717
GO:0000070	mitotic sister chromatid segregation	8	290	155	17846	0.0264175	4	126	155	17846	0.121626	5	171	155	17846	0.0926048
GO:0051028	mRNA transport	8	290	155	17846	0.0264175	3	126	155	17846	0.254788	5	171	155	17846	0.0926048
GO:0061572	actin filament bundle organization	8	290	155	17846	0.0264175	5	126	155	17846	0.042426	3	171	155	17846	0.347716
GO:0038179		4	290	40	17846	0.0267155	NA	NA	NA	NA	NA	40	17846	0.000568299	0.00837633	BCAR1/CYFIP2/MAGI2/NGF
GO:0010881	regulation of cardiac muscle contraction by regulation of the release of sequestered calcium ion	3	290	20	17846	0.0267155	1	126	20	17846	0.28357	2	171	20	17846	0.0875876
GO:0044346	fibroblast apoptotic process	3	290	20	17846	0.0267155	2	126	20	17846	0.064156	1	171	20	17846	0.338339
GO:0002062	chondrocyte differentiation	7	290	123	17846	0.0268909	2	126	123	17846	0.349188	5	171	123	17846	0.047746
GO:0051283	negative regulation of sequestering of calcium ion	7	290	123	17846	0.0268909	5	126	123	17846	0.0218999	2	171	123	17846	0.451797
GO:0034612	response to tumor necrosis factor	12	290	302	17846	0.0271163	4	126	302	17846	0.313143	8	171	302	17846	0.0588899
GO:0032880	regulation of protein localization	28	290	1008	17846	0.0271163	8	126	1008	17846	0.50006	21	171	1008	17846	0.00930072
GO:0003002	regionalization	13	290	342	17846	0.0274116	6	126	342	17846	0.154834	8	171	342	17846	0.0947956
GO:0032729	positive regulation of interferon-gamma production	5	290	65	17846	0.0274116	3	126	65	17846	0.0743871	2	171	65	17846	0.300205
GO:0061097	regulation of protein tyrosine kinase activity	6	290	93	17846	0.0274242	1	126	93	17846	0.550394	6	171	93	17846	0.0048491
GO:1901564	organonitrogen compound metabolic process	132	290	6748	17846	0.0275149	51	126	6748	17846	0.408039	86	171	6748	17846	0.00835697
GO:0001944	vasculature development	21	290	685	17846	0.0277087	14	126	685	17846	0.00669772	8	171	685	17846	0.455897
GO:0019221	cytokine-mediated signaling pathway	23	290	776	17846	0.0277087	7	126	776	17846	0.416502	17	171	776	17846	0.0147028
GO:1901360	organic cyclic compound metabolic process	122	290	6157	17846	0.0277241	50	126	6157	17846	0.282248	76	171	6157	17846	0.0351262
GO:0051056	regulation of small GTPase mediated signal transduction	13	290	343	17846	0.0278365	7	126	343	17846	0.0746468	8	171	343	17846	0.0958809
GO:0051338	regulation of transferase activity	27	290	964	17846	0.028088	9	126	964	17846	0.36841	22	171	964	17846	0.00296005
GO:0017145	stem cell division	4	290	41	17846	0.0285313	2	126	41	17846	0.15297	2	171	41	17846	0.206386
GO:0050873	brown fat cell differentiation	4	290	41	17846	0.0285313	1	126	41	17846	0.376486	3	171	41	17846	0.0504916
GO:0051668	localization within membrane	6	290	94	17846	0.0285313	2	126	94	17846	0.291402	4	171	94	17846	0.0765392
GO:0051282	regulation of sequestering of calcium ion	7	290	125	17846	0.028748	5	126	125	17846	0.0231838	2	171	125	17846	0.457509
GO:0051965	positive regulation of synapse assembly	5	290	66	17846	0.0287706	1	126	66	17846	0.464145	4	171	66	17846	0.0324843
GO:0000819	sister chromatid segregation	9	290	193	17846	0.0289944	5	126	193	17846	0.0788065	5	171	193	17846	0.16002
GO:0006725	cellular aromatic compound metabolic process	118	290	5932	17846	0.029154	48	126	5932	17846	0.291402	74	171	5932	17846	0.0327283
GO:0044238	primary metabolic process	193	290	10524	17846	0.0296985	78	126	10524	17846	0.39688	121	171	10524	17846	0.0114078
GO:0030038	contractile actin filament bundle assembly	6	290	95	17846	0.0297509	3	126	95	17846	0.137903	3	171	95	17846	0.21743
GO:0043149	stress fiber assembly	6	290	95	17846	0.0297509	3	126	95	17846	0.137903	3	171	95	17846	0.21743
GO:0140014	mitotic nuclear division	11	290	269	17846	0.0306176	5	126	269	17846	0.174114	7	171	269	17846	0.0863365
GO:0045859	regulation of protein kinase activity	23	290	784	17846	0.0306652	8	126	784	17846	0.330569	19	171	784	17846	0.00375332
GO:0099504	synaptic vesicle cycle	9	290	195	17846	0.0306938	6	126	195	17846	0.0290636	3	171	195	17846	0.418549
GO:0030098	lymphocyte differentiation	13	290	349	17846	0.0314635	6	126	349	17846	0.162647	8	171	349	17846	0.101703
GO:0055002	striated muscle cell development	8	290	161	17846	0.0317336	4	126	161	17846	0.131206	4	171	161	17846	0.230979
GO:0051223	regulation of protein transport	21	290	695	17846	0.0317571	6	126	695	17846	0.460496	15	171	695	17846	0.0267873
GO:0051208	sequestering of calcium ion	7	290	128	17846	0.0321165	5	126	128	17846	0.0248643	2	171	128	17846	0.462986
GO:0043434	response to peptide hormone	15	290	433	17846	0.0323514	4	126	433	17846	0.459055	11	171	433	17846	0.0283655
GO:1903047	mitotic cell cycle process	24	290	835	17846	0.0324976	12	126	835	17846	0.0903082	14	171	835	17846	0.137877
GO:0043270	positive regulation of ion transport	11	290	272	17846	0.0328139	2	126	272	17846	0.626867	9	171	272	17846	0.0145689
GO:0009112	nucleobase metabolic process	4	290	43	17846	0.0328599	2	126	43	17846	0.161095	2	171	43	17846	0.218616
GO:0021795	cerebral cortex cell migration	4	290	43	17846	0.0328599	1	126	43	17846	0.382403	3	171	43	17846	0.0554795
[truncated: 4,230 more rows]

## Sheet: ST4 Literature search
ST4 Literature support of HRGs in dendrite development term
[truncated: 49 more rows]

[truncated: 2 more sheets: ST5 eQTL, ST6 Blood samples of iPSC]
